# Supplementary material for: CO2-Assisted propane aromatization over phosphorus-modified Ga/ZSM-5 catalysts
Source: Royal Society of Chemistry journal article supplement (doi:10.1039/c9cy02589h), 2020-01-01
Supplement: c9cy02589h1.pdf [file c9cy02589h1.pdf]

## Supplementary Information

### CO<sub>2</sub>-assisted propane aromatization over phosphorous-modified Ga/ZSM-5 catalysts

Xiaoran Niu <sup>1,2,#</sup>, Xiaowa Nie <sup>2,3,#,\*</sup>, Chunhui Yang <sup>1,\*</sup>, Jingguang G. Chen <sup>2,4,\*</sup>

<sup>1</sup> *MIIT Key Laboratory of Critical Materials Technology for New Energy Conversion and Storage, School of Chemistry and Chemical Engineering, Harbin Institute of Technology, 150001 Harbin, China*

<sup>2</sup> *Department of Chemical Engineering, Columbia University, New York, NY 10027, USA*

<sup>3</sup> *State Key Laboratory of Fine Chemicals, PSU-DUT Joint Center for Energy Research, School of Chemical Engineering, Dalian University of Technology, Dalian, 116024, China*

<sup>4</sup> *Chemistry Division, Brookhaven National Laboratory, Upton, NY 11973, USA*

# Authors contributed equally to this work

\*Correspondence should be addressed to niexiaowa@dlut.edu.cn, yangchh@hit.edu.cn and jgchen@columbia.edu

#### ■ Propane conversion over HZSM-5

On HZSM-5, the cracking products (41.4% CH<sub>4</sub> and 30.1% C<sub>2</sub>) dominated the products distribution, and only a small amount of propene (10.3%) and liquid aromatics (16.5%) were obtained, as shown in **Table 1**. These results indicated that the C-C bond scission was more facile than C-H bond activation of propane molecule catalyzed by the Brønsted acid site of HZSM-5. To gain insight into the mechanism and kinetics of propane conversion over HZSM-5, DFT studies were performed on propane cracking and dehydrogenation.

As shown in **Figure S7**, the propane molecule was adsorbed above the Brønsted acid site of HZSM-5, and simultaneously interacted with the framework O atom. The H<sub>zeolite</sub>-C and H-O<sub>zeolite</sub> interatomic distances in propane adsorption state were 2.50 and 2.38 Å, respectively, and the adsorption energy was calculated to be -0.65 eV. Catalyzed by the Brønsted acid site, one of the C-C bonds in propane was activated to cleave, resulting in the formation of an ethoxide (C<sub>2</sub>H<sub>5</sub>O) species and a CH<sub>4</sub> molecule. In the transition state, the C-C bond length was elongated to 2.06 from 1.53 Å in the adsorbed state, generating a C<sub>2</sub>H<sub>5</sub> carbonium species; while the H<sub>zeolite</sub>-C distance was calculated to be 1.19 Å, showing the tendency of forming CH<sub>4</sub> molecule. Then, the formed CH<sub>4</sub> desorbed from the zeolite acid site, with the C<sub>2</sub>H<sub>5</sub>O species retained for subsequent dehydrogenation. Finally, an ethylene molecule was produced via H

transfer from  $\text{C}_2\text{H}_5\text{O}$  to the framework O of ZSM-5. The C-H and  $\text{H-O}_{\text{zeolite}}$  distances were 1.29 and 2.11 Å, respectively, in the transition state configuration. Ethylene adsorbed at the Brønsted acid site through H- $\pi$  interaction and the calculated H-C distances were 2.33 and 2.18 Å, respectively. The energy diagram of propane cracking to produce methane and ethylene over HZSM-5 was plotted in **Figure S8**, in which the formation of  $\text{CH}_4$  had an activation barrier of 1.62 eV while ethylene formation from the dehydrogenation of  $\text{C}_2\text{H}_5\text{O}$  species needed to overcome a barrier of 1.43 eV. The desorption energy of ethylene was 0.87 eV.

For comparison, the dehydrogenation of propane to propene over HZSM-5 was examined, and the optimized structures of all states involved in the path are illustrated in **Figure S9**. Instead of activating the C-C bond, one of the C-H bonds in propane molecule was activated by the interaction of Brønsted acid site. A  $\text{H}_2$  molecule was produced in the first step from one H of  $\text{C}_3\text{H}_8$  with the Brønsted acid proton, concurrently generating a  $\text{C}_3\text{H}_7\text{O}$  species bound to the ZSM-5 framework. The C-H bond in the transition state of  $\text{H}_2$  formation step was activated to 1.88 from 1.10 Å in the adsorbed state while the  $\text{H}_{\text{zeolite}}\text{-O}_{\text{zeolite}}$  distance was elongated to 1.91 Å, and the H-H bond length was optimized to 0.87 Å. Once the  $\text{C}_3\text{H}_7\text{O}$  species was formed, it went through a dehydrogenation step to produce a propene molecule, concerted with the regeneration of the Brønsted acid site of HZSM-5. The C-H and  $\text{H-O}_{\text{zeolite}}$  distances were 1.14 and 1.76 Å, respectively in the transition state, with the  $\text{C}_3\text{H}_6\cdots\text{H}$  species moved upward relative to the framework O, as shown in **Figure S9**. In propene adsorption state via the H- $\pi$  interaction, the  $\text{H}_{\text{zeolite}}\text{-C}$  distances were calculated to be 1.96 and 2.52 Å, respectively, resulting in an adsorption energy of -1.32 eV. As illustrated in **Figure S8**, the  $\text{H}_2$  formation step had a higher barrier (2.11 eV) than that (0.40 eV) of the dehydrogenation of  $\text{C}_3\text{H}_7\text{O}$  species, indicating that the C-H bond activation of propane by the Brønsted acid site proceeded slowly over HZSM-5.

Comparing the energy diagrams between propane cracking and dehydrogenation over HZSM-5, the cracking reaction was found to be kinetically more favorable due to lower barriers, and methane would be the dominate product, as evidenced in **Figure S8**. These DFT calculations are consistent with the experimental results given in **Table 1** in the manuscript.

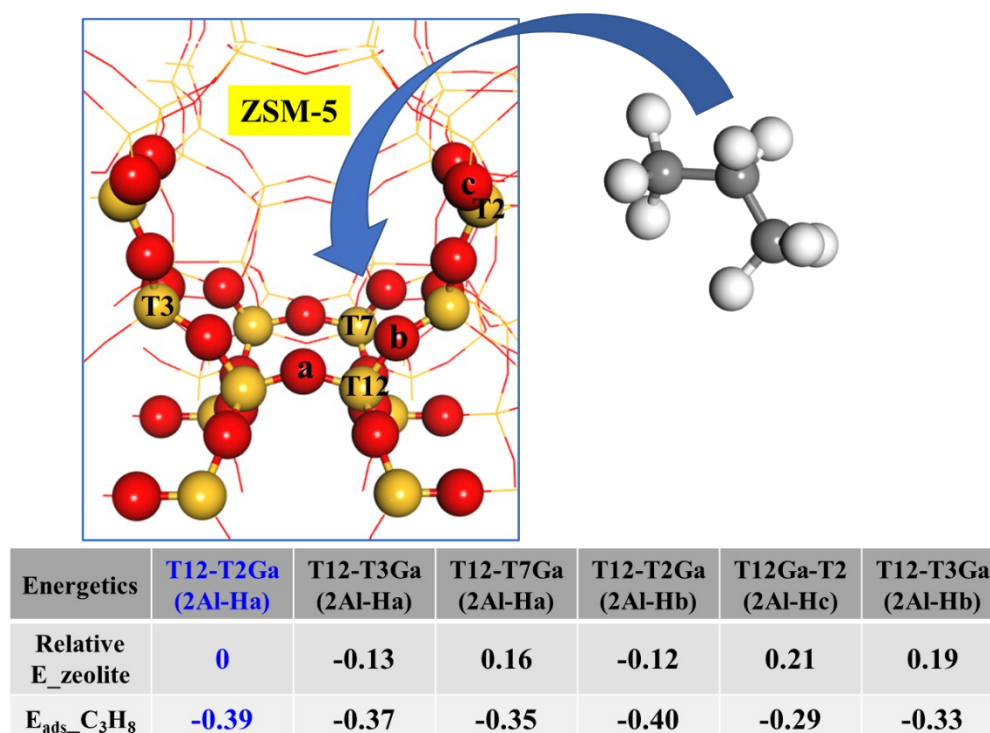

**Figure S1.** Relative stabilities of Ga/ZSM-5 catalysts with different Al substitution T sites and different Ga, H locations. Adsorption energies of C<sub>3</sub>H<sub>8</sub> on these different Ga/ZSM-5 catalysts. T12-T2Ga (2Al-Ha) was the model used in this work. (Yellow: Si, Red: O, Grey: C, White: H).

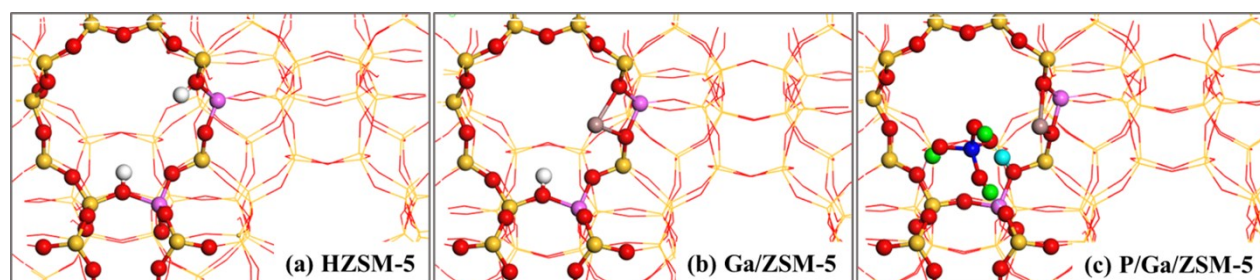

**Figure S2.** Optimized structures of (a) HZSM-5, (b) Ga/ZSM-5 and (a) P/Ga/ZSM-5 (Yellow: Si, Pink: Al, Brown: Ga, Red: O, White: H, Bright green: H of H<sub>3</sub>PO<sub>4</sub>, Bright blue: H of ZSM-5, Dark blue: P).

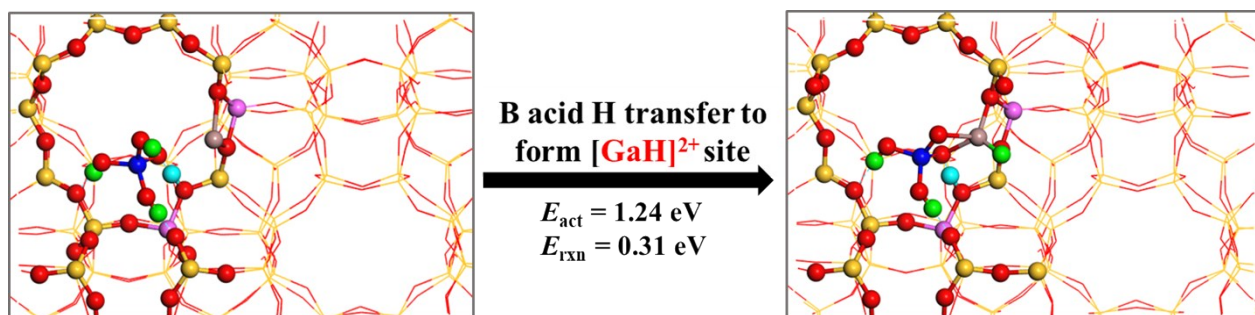

**Figure S3.** Transfer of the Brønsted acid proton to form new  $[\text{GaH}]^{2+}$  active site for propane dehydrogenation to propene over P/Ga/ZSM-5 (Yellow: Si, Pink: Al, Brown: Ga, Red: O, Bright green: H of  $\text{H}_3\text{PO}_4$ , Bright blue: H of ZSM-5, Dark blue: P).

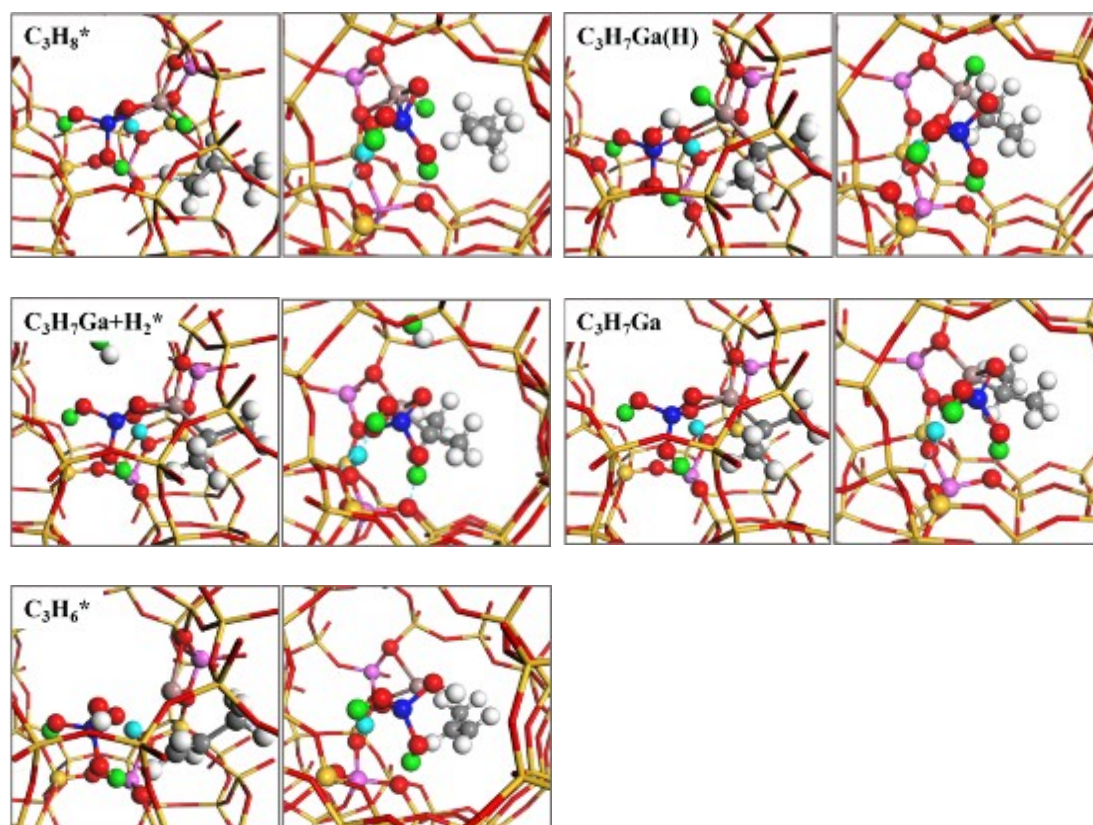

**Figure S4.** Optimized structures of reactant, intermediates, and product associated with propane dehydrogenation to propene over P/Ga/ZSM-5 (Yellow: Si, Pink: Al, Brown: Ga, Red: O, Grey: C, White: H, Bright green: H of  $\text{H}_3\text{PO}_4$ , Bright blue: H of ZSM-5, Dark blue: P).



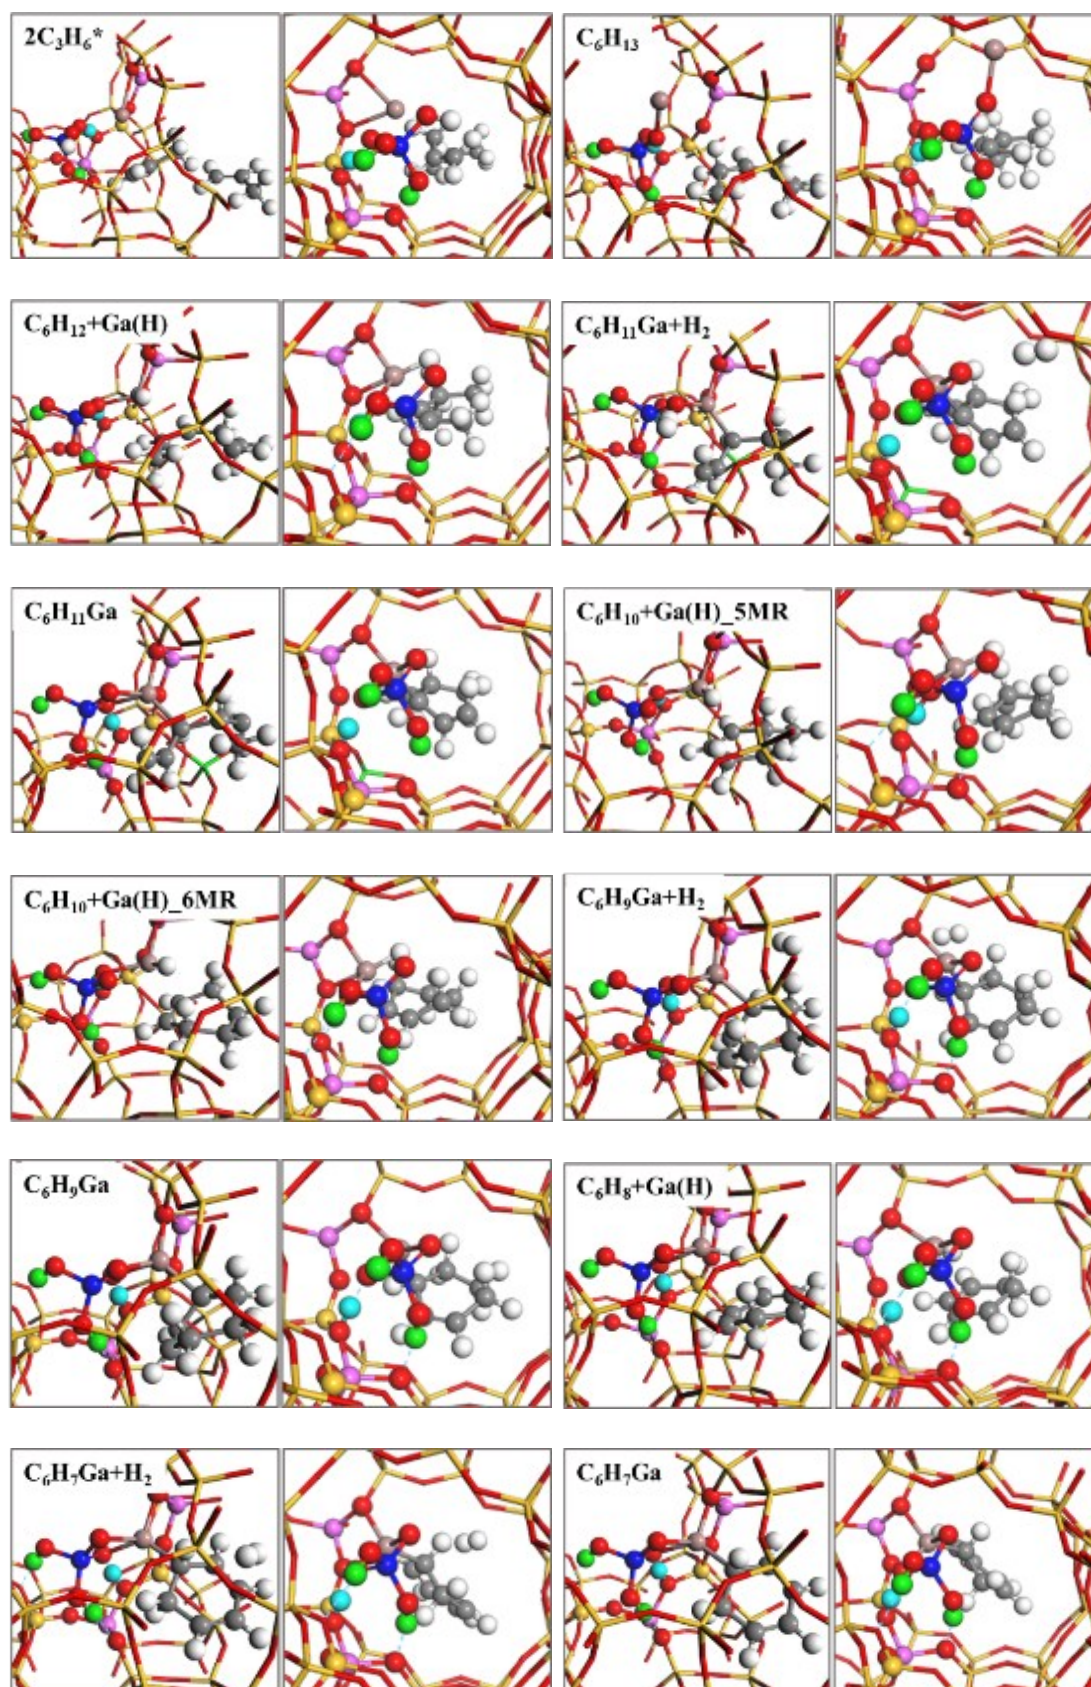



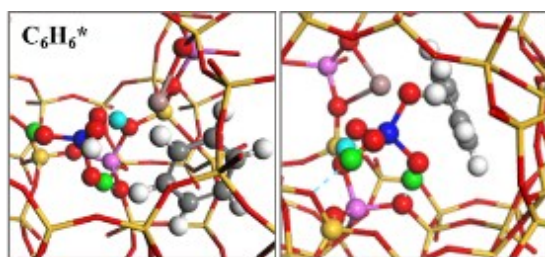

**Figure S5.** Optimized structures of reactant, intermediates, and product associated with propene aromatization to benzene over P/Ga/ZSM-5 (Yellow: Si, Pink: Al, Brown: Ga, Red: O, Grey: C, White: H, Bright green: H of H<sub>3</sub>PO<sub>4</sub>, Bright blue: H of ZSM-5, Dark blue: P).

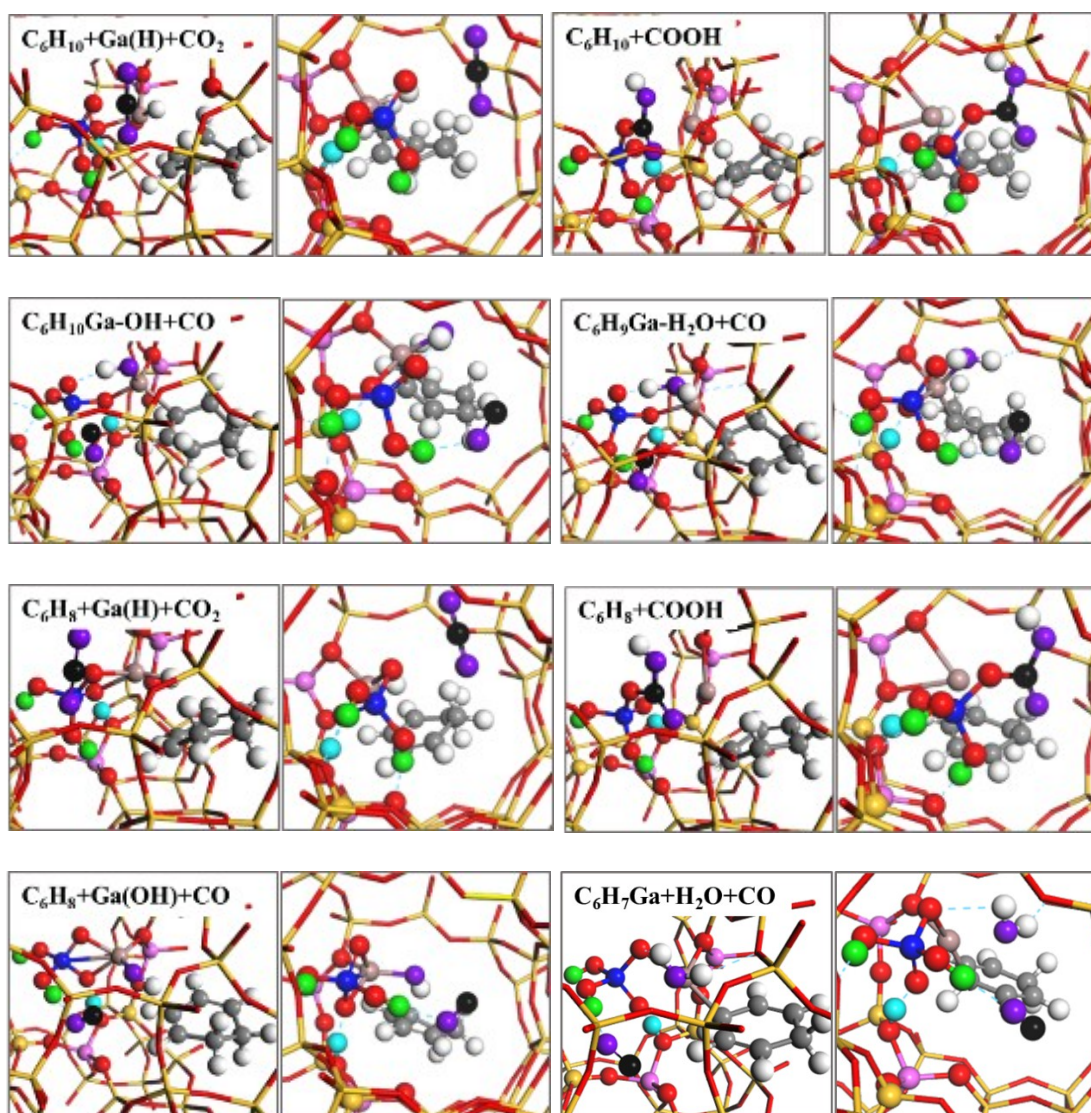

**Figure S6.** Optimized structures of reactant, intermediates and product associated with dehydrogenation of C<sub>6</sub>H<sub>10</sub>+Ga(H) and C<sub>6</sub>H<sub>8</sub>+Ga(H) species in benzene production over P/Ga/ZSM-5 in the presence of CO<sub>2</sub>. (Yellow: Si, Pink: Al, Brown: Ga, Red: O, Grey: C, White: H, Bright green: H of H<sub>3</sub>PO<sub>4</sub>, Bright blue: H of ZSM-5, Dark blue: P, Black: C of CO<sub>2</sub>, Purple: O of CO<sub>2</sub>).

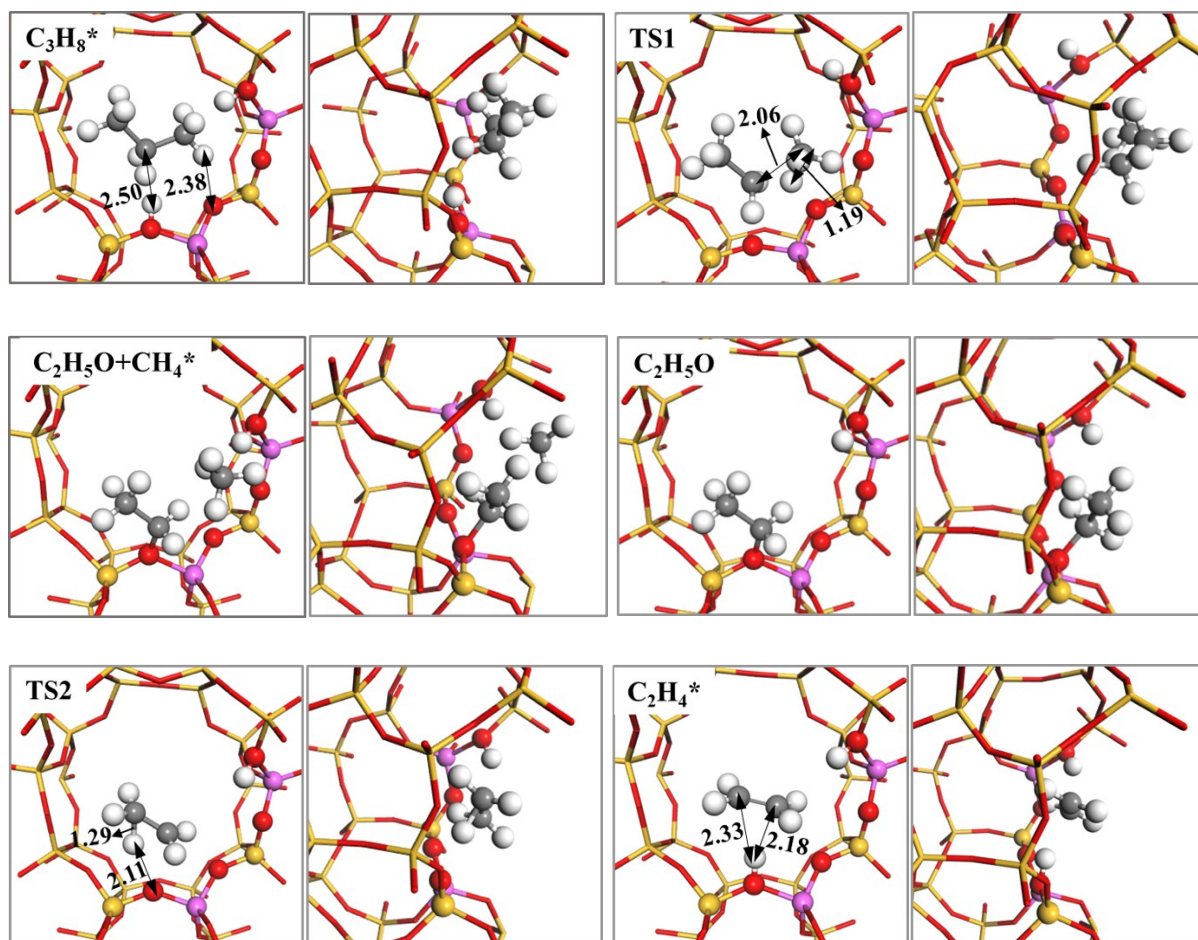

**Figure S7.** Optimized structures of reactant, intermediates, transition states, and product associated with propane cracking to methane and ethylene over HZSM-5 (Yellow: Si, Pink: Al, Red: O, White: H, Grey: C).



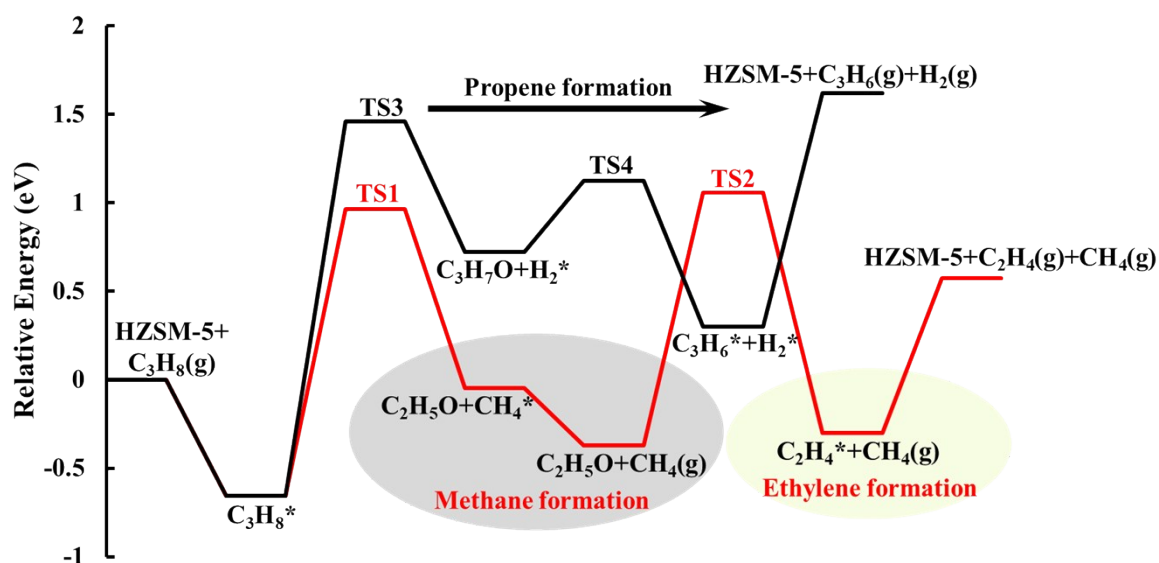

**Figure S8.** Energy diagrams of propane cracking to methane and ethylene as well as propane dehydrogenation to propene over HZSM-5. (The optimized structures of all states involved in the two conversion pathways are provided in **Figure S6** and **Figure S8**, respectively).

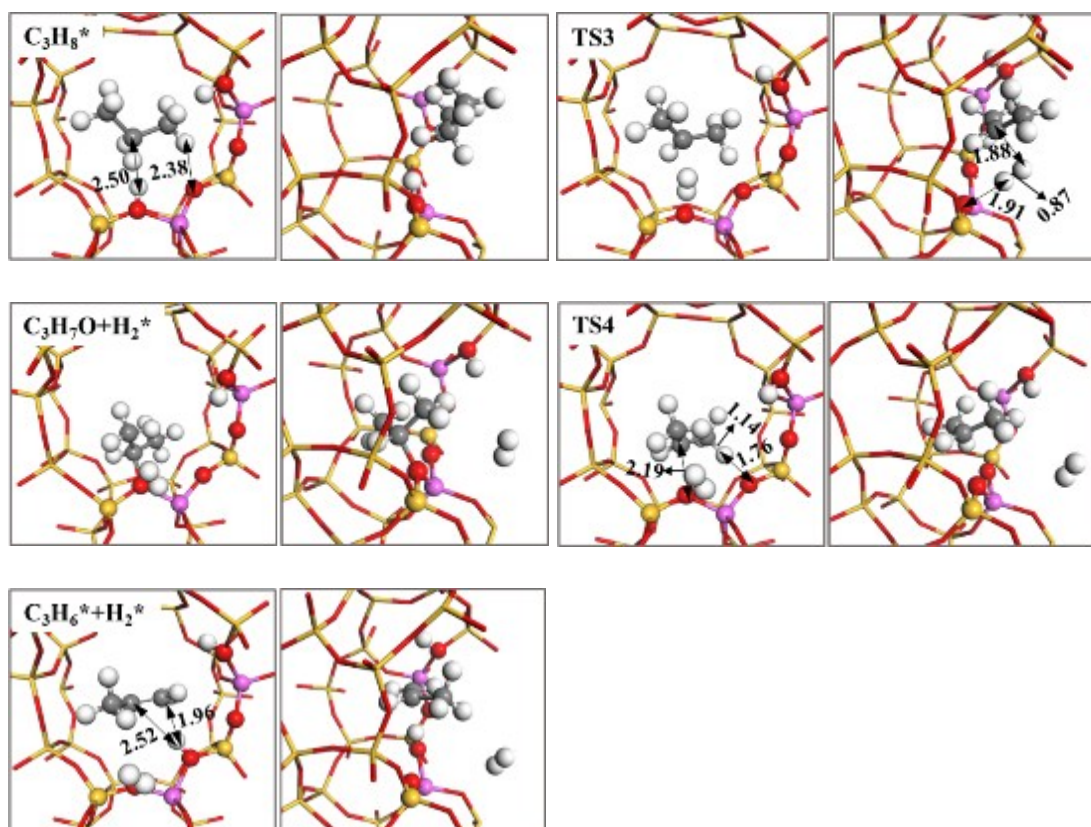

**Figure S9.** Optimized structures of reactant, intermediate, transition states, and product associated with propane dehydrogenation to propene reaction over HZSM-5 (Yellow: Si, Pink: Al, Red: O, White: H, Grey: C).



**Table S1.** TGA results of spent catalysts normalized by propane conversion.

| Catalyst   | Treatment                       | Weight loss/% |
|------------|---------------------------------|---------------|
| P/Ga/ZSM-5 | C <sub>3</sub> -CO <sub>2</sub> | 10.0          |
|            | C <sub>3</sub> -Ar              | 10.3          |
| Ga/ZSM-5   | C <sub>3</sub> -CO <sub>2</sub> | 41.3          |
|            | C <sub>3</sub> -Ar              | 30.5          |

Note: The spent catalysts were those underwent 14 hours on stream.

**Table S2.** Structure files in fractional coordinates for all computed structures.

| <b>a) structures involved in propane dehydrogenation to propene over P/Ga/ZSM-5 (states shown in Fig. 4)</b> |         |         |         |
|--------------------------------------------------------------------------------------------------------------|---------|---------|---------|
| <b>P/Ga/ZSM-5 (Brønsted acid site)</b>                                                                       |         |         |         |
| SI2                                                                                                          | 0.42228 | 0.05905 | 0.64956 |
| SI3                                                                                                          | 0.30639 | 0.03057 | 0.79768 |
| SI4                                                                                                          | 0.28048 | 0.05785 | 0.01897 |
| SI5                                                                                                          | 0.12157 | 0.06398 | 0.01352 |
| SI6                                                                                                          | 0.06697 | 0.02994 | 0.80187 |
| SI7                                                                                                          | 0.18234 | 0.06125 | 0.66829 |
| SI8                                                                                                          | 0.42115 | 0.82742 | 0.67445 |
| SI9                                                                                                          | 0.30364 | 0.87129 | 0.81013 |
| SI10                                                                                                         | 0.26748 | 0.83066 | 0.02887 |
| SI11                                                                                                         | 0.11273 | 0.82748 | 0.01753 |
| SI12                                                                                                         | 0.06541 | 0.87221 | 0.80325 |
| SI13                                                                                                         | 0.18187 | 0.82753 | 0.67467 |
| SI14                                                                                                         | 0.07722 | 0.94227 | 0.15369 |
| SI15                                                                                                         | 0.19466 | 0.97059 | 0.29831 |
| SI16                                                                                                         | 0.21856 | 0.93985 | 0.52093 |
| SI17                                                                                                         | 0.37889 | 0.93352 | 0.516   |
| SI18                                                                                                         | 0.43417 | 0.96903 | 0.30559 |
| SI19                                                                                                         | 0.31953 | 0.93915 | 0.16874 |
| SI20                                                                                                         | 0.08243 | 0.17333 | 0.16741 |
| SI21                                                                                                         | 0.19597 | 0.13    | 0.30959 |
| SI22                                                                                                         | 0.23272 | 0.17019 | 0.52592 |
| SI23                                                                                                         | 0.38738 | 0.17369 | 0.51018 |
| SI24                                                                                                         | 0.43568 | 0.12715 | 0.29844 |
| SI25                                                                                                         | 0.31648 | 0.17023 | 0.17337 |
| SI26                                                                                                         | 0.58017 | 0.55826 | 0.34812 |
| SI27                                                                                                         | 0.69011 | 0.53408 | 0.19178 |

|      |         |         |         |
|------|---------|---------|---------|
| SI28 | 0.71714 | 0.55892 | 0.97472 |
| SI29 | 0.87558 | 0.56607 | 0.98371 |
| SI30 | 0.93163 | 0.53077 | 0.19384 |
| SI31 | 0.81295 | 0.55559 | 0.32272 |
| SI32 | 0.57867 | 0.32923 | 0.3273  |
| SI33 | 0.69452 | 0.3765  | 0.18811 |
| SI34 | 0.73031 | 0.32852 | 0.97256 |
| SI35 | 0.88471 | 0.32738 | 0.9845  |
| SI36 | 0.93667 | 0.37254 | 0.19483 |
| SI37 | 0.92454 | 0.44272 | 0.84963 |
| SI38 | 0.78018 | 0.43867 | 0.4804  |
| SI39 | 0.62016 | 0.43288 | 0.48884 |
| SI40 | 0.56382 | 0.4692  | 0.70006 |
| SI41 | 0.67698 | 0.43615 | 0.83337 |
| SI42 | 0.91784 | 0.67565 | 0.82978 |
| SI43 | 0.8024  | 0.63778 | 0.69164 |
| SI44 | 0.76499 | 0.66677 | 0.4722  |
| SI45 | 0.61011 | 0.67246 | 0.48782 |
| SI46 | 0.56185 | 0.62696 | 0.70064 |
| SI47 | 0.68123 | 0.67557 | 0.82205 |
| SI48 | 0.57959 | 0.94211 | 0.35625 |
| SI49 | 0.69272 | 0.96666 | 0.20581 |
| SI50 | 0.7218  | 0.94028 | 0.98651 |
| SI51 | 0.88046 | 0.93592 | 0.99278 |
| SI52 | 0.93306 | 0.96882 | 0.20195 |
| SI53 | 0.8168  | 0.94155 | 0.34062 |
| SI54 | 0.57829 | 0.17384 | 0.32741 |
| SI55 | 0.69551 | 0.12292 | 0.19436 |
| SI56 | 0.73445 | 0.16849 | 0.97594 |
| SI57 | 0.88872 | 0.17317 | 0.98056 |
| SI58 | 0.9384  | 0.12639 | 0.19192 |
| SI59 | 0.81956 | 0.16553 | 0.32317 |
| SI60 | 0.92358 | 0.05469 | 0.85219 |
| SI61 | 0.80322 | 0.02432 | 0.70696 |
| SI62 | 0.78292 | 0.06265 | 0.4871  |
| SI63 | 0.62182 | 0.07094 | 0.48788 |
| SI64 | 0.56769 | 0.03242 | 0.69846 |
| SI65 | 0.68022 | 0.05733 | 0.84187 |
| SI66 | 0.92028 | 0.82795 | 0.83372 |
| SI67 | 0.80367 | 0.86429 | 0.68761 |
| SI68 | 0.76783 | 0.82498 | 0.47064 |
| SI69 | 0.61351 | 0.82619 | 0.49193 |
| SI70 | 0.56543 | 0.87488 | 0.70146 |
| SI71 | 0.683   | 0.83021 | 0.82847 |

|      |         |         |         |
|------|---------|---------|---------|
| SI72 | 0.41921 | 0.44235 | 0.64911 |
| SI73 | 0.30603 | 0.46948 | 0.79774 |
| SI74 | 0.28364 | 0.44173 | 0.02119 |
| SI75 | 0.1255  | 0.43598 | 0.01356 |
| SI76 | 0.07254 | 0.47146 | 0.80381 |
| SI77 | 0.18428 | 0.44156 | 0.66384 |
| SI78 | 0.41975 | 0.67354 | 0.67293 |
| SI79 | 0.30231 | 0.62806 | 0.80694 |
| SI80 | 0.26651 | 0.67012 | 0.02543 |
| SI81 | 0.11187 | 0.67406 | 0.01464 |
| SI82 | 0.06315 | 0.62946 | 0.80353 |
| SI83 | 0.17985 | 0.66983 | 0.67228 |
| SI84 | 0.07596 | 0.55686 | 0.14747 |
| SI85 | 0.19387 | 0.52862 | 0.29287 |
| SI86 | 0.21899 | 0.5619  | 0.51297 |
| SI87 | 0.37903 | 0.56879 | 0.51168 |
| SI88 | 0.43523 | 0.53187 | 0.30229 |
| SI89 | 0.32068 | 0.56114 | 0.16616 |
| SI90 | 0.08291 | 0.32673 | 0.16493 |
| SI91 | 0.19573 | 0.36938 | 0.30864 |
| SI92 | 0.23235 | 0.33044 | 0.52625 |
| SI93 | 0.38692 | 0.32785 | 0.51147 |
| SI94 | 0.43451 | 0.37437 | 0.29859 |
| SI95 | 0.31706 | 0.32803 | 0.17347 |
| O96  | 0.35845 | 0.06796 | 0.72328 |
| O97  | 0.31685 | 0.05829 | 0.91049 |
| O98  | 0.20064 | 0.0474  | 0.00569 |
| O99  | 0.08892 | 0.06895 | 0.90323 |
| O100 | 0.10549 | 0.06165 | 0.70622 |
| O101 | 0.23009 | 0.04653 | 0.76407 |
| O102 | 0.36146 | 0.82762 | 0.75632 |
| O103 | 0.30558 | 0.85537 | 0.92849 |
| O104 | 0.18963 | 0.85393 | 0.02313 |
| O105 | 0.08667 | 0.83166 | 0.90334 |
| O106 | 0.10461 | 0.83976 | 0.70815 |
| O107 | 0.23043 | 0.8515  | 0.76591 |
| O108 | 0.31943 | 0.95015 | 0.79039 |
| O109 | 0.08586 | 0.95082 | 0.81437 |
| O110 | 0.43187 | 0.12706 | 0.58385 |
| O111 | 0.41348 | 0.99588 | 0.57415 |
| O112 | 0.39644 | 0.86355 | 0.5721  |
| O113 | 0.1998  | 0.13466 | 0.62281 |
| O114 | 0.19144 | 0.00369 | 0.58391 |
| O115 | 0.19777 | 0.86948 | 0.57352 |



|      |         |         |         |
|------|---------|---------|---------|
| O116 | 0.98765 | 0.03986 | 0.78134 |
| O117 | 0.98539 | 0.86542 | 0.78631 |
| O118 | 0.14223 | 0.93309 | 0.22482 |
| O119 | 0.18476 | 0.94238 | 0.41085 |
| O120 | 0.29899 | 0.9452  | 0.51248 |
| O121 | 0.40841 | 0.92885 | 0.40377 |
| O122 | 0.39634 | 0.9402  | 0.20721 |
| O123 | 0.27084 | 0.95525 | 0.26324 |
| O124 | 0.14048 | 0.17432 | 0.25175 |
| O125 | 0.19122 | 0.14771 | 0.42739 |
| O126 | 0.31025 | 0.14734 | 0.51286 |
| O127 | 0.41555 | 0.17059 | 0.39677 |
| O128 | 0.39382 | 0.15436 | 0.20231 |
| O129 | 0.27026 | 0.14864 | 0.2686  |
| O130 | 0.18037 | 0.05092 | 0.29174 |
| O131 | 0.41825 | 0.0487  | 0.31959 |
| O132 | 0.06661 | 0.87378 | 0.08946 |
| O133 | 0.08523 | 0.00501 | 0.07704 |
| O134 | 0.10963 | 0.13591 | 0.06759 |
| O135 | 0.30318 | 0.86498 | 0.12479 |
| O136 | 0.31025 | 0.99552 | 0.08253 |
| O137 | 0.29522 | 0.12886 | 0.07402 |
| O138 | 0.51361 | 0.95705 | 0.28956 |
| O139 | 0.51479 | 0.13657 | 0.27472 |
| O140 | 0.64259 | 0.57107 | 0.27332 |
| O141 | 0.67966 | 0.56712 | 0.08211 |
| O142 | 0.79688 | 0.54916 | 0.99208 |
| O143 | 0.90853 | 0.57107 | 0.09424 |
| O144 | 0.89115 | 0.55799 | 0.29091 |
| O145 | 0.7678  | 0.54633 | 0.22314 |
| O146 | 0.64    | 0.33224 | 0.24956 |
| O147 | 0.69239 | 0.34899 | 0.07441 |
| O148 | 0.80804 | 0.35409 | 0.97599 |
| O149 | 0.90983 | 0.32943 | 0.09978 |
| O150 | 0.9028  | 0.34179 | 0.29598 |
| O151 | 0.76764 | 0.36888 | 0.23589 |
| O152 | 0.67108 | 0.45488 | 0.1908  |
| O153 | 0.91719 | 0.45094 | 0.17843 |
| O154 | 0.5669  | 0.62689 | 0.4108  |
| O155 | 0.59413 | 0.49752 | 0.42641 |
| O156 | 0.59928 | 0.3638  | 0.43298 |
| O157 | 0.79499 | 0.62491 | 0.37892 |
| O158 | 0.80094 | 0.49063 | 0.39403 |
| O159 | 0.8052  | 0.36207 | 0.44372 |

|      |         |         |         |
|------|---------|---------|---------|
| O160 | 0.01036 | 0.5445  | 0.21622 |
| O161 | 0.01735 | 0.36618 | 0.20579 |
| O162 | 0.87042 | 0.43411 | 0.76049 |
| O163 | 0.82138 | 0.45365 | 0.58158 |
| O164 | 0.7009  | 0.43749 | 0.49746 |
| O165 | 0.58749 | 0.43079 | 0.59894 |
| O166 | 0.59886 | 0.43846 | 0.79878 |
| O167 | 0.72393 | 0.44845 | 0.73843 |
| O168 | 0.86193 | 0.68185 | 0.74295 |
| O169 | 0.80807 | 0.6485  | 0.571   |
| O170 | 0.6871  | 0.64581 | 0.48945 |
| O171 | 0.57839 | 0.66765 | 0.59867 |
| O172 | 0.60415 | 0.65899 | 0.79236 |
| O173 | 0.72925 | 0.66753 | 0.7246  |
| O174 | 0.81133 | 0.5613  | 0.72486 |
| O175 | 0.58147 | 0.54853 | 0.68659 |
| O176 | 0.93232 | 0.37472 | 0.9159  |
| O177 | 0.91221 | 0.50582 | 0.92297 |
| O178 | 0.88858 | 0.6371  | 0.92755 |
| O179 | 0.69115 | 0.3619  | 0.87976 |
| O180 | 0.68786 | 0.49279 | 0.92017 |
| O181 | 0.70489 | 0.62703 | 0.91183 |
| O182 | 0.48413 | 0.45876 | 0.7163  |
| O183 | 0.48247 | 0.6348  | 0.72482 |
| O184 | 0.64207 | 0.9286  | 0.28146 |
| O185 | 0.68929 | 0.93129 | 0.09685 |
| O186 | 0.80152 | 0.95432 | 0.99374 |
| O187 | 0.90733 | 0.92564 | 0.10615 |
| O188 | 0.89359 | 0.94667 | 0.30266 |
| O189 | 0.76881 | 0.96106 | 0.24711 |
| O190 | 0.6424  | 0.16956 | 0.25358 |
| O191 | 0.6982  | 0.14797 | 0.07977 |
| O192 | 0.81233 | 0.14506 | 0.98183 |
| O193 | 0.91964 | 0.16832 | 0.09208 |
| O194 | 0.89644 | 0.1562  | 0.28562 |
| O195 | 0.76907 | 0.12732 | 0.24655 |
| O196 | 0.6708  | 0.04524 | 0.19883 |
| O197 | 0.92009 | 0.0477  | 0.1768  |
| O198 | 0.56756 | 0.87517 | 0.42338 |
| O199 | 0.59351 | 0.00499 | 0.43076 |
| O200 | 0.59509 | 0.13857 | 0.43392 |
| O201 | 0.80197 | 0.86566 | 0.37869 |
| O202 | 0.80512 | 0.99362 | 0.43259 |
| O203 | 0.81749 | 0.12846 | 0.43418 |

|      |         |         |         |
|------|---------|---------|---------|
| O204 | 0.01175 | 0.95455 | 0.22286 |
| O205 | 0.01767 | 0.13524 | 0.21424 |
| O206 | 0.85658 | 0.05538 | 0.78468 |
| O207 | 0.81099 | 0.06291 | 0.60061 |
| O208 | 0.70273 | 0.07004 | 0.48366 |
| O209 | 0.59614 | 0.07345 | 0.60244 |
| O210 | 0.60425 | 0.05704 | 0.80016 |
| O211 | 0.72821 | 0.03608 | 0.74896 |
| O212 | 0.86177 | 0.8276  | 0.75063 |
| O213 | 0.80913 | 0.83953 | 0.57273 |
| O214 | 0.69107 | 0.85076 | 0.48522 |
| O215 | 0.58818 | 0.82909 | 0.60697 |
| O216 | 0.60668 | 0.85156 | 0.80026 |
| O217 | 0.73028 | 0.84497 | 0.73152 |
| O218 | 0.81597 | 0.94474 | 0.69308 |
| O219 | 0.58136 | 0.95316 | 0.67715 |
| O220 | 0.9326  | 0.1281  | 0.90369 |
| O221 | 0.92034 | 0.99745 | 0.93922 |
| O222 | 0.89418 | 0.8663  | 0.93346 |
| O223 | 0.69831 | 0.13184 | 0.88222 |
| O224 | 0.68662 | 0.00428 | 0.93329 |
| O225 | 0.70909 | 0.87228 | 0.92401 |
| O226 | 0.48885 | 0.04719 | 0.71596 |
| O227 | 0.48588 | 0.86545 | 0.7217  |
| O228 | 0.35595 | 0.43008 | 0.72283 |
| O229 | 0.31497 | 0.44    | 0.90956 |
| O230 | 0.20386 | 0.45599 | 0.01789 |
| O231 | 0.10181 | 0.4298  | 0.89808 |
| O232 | 0.10685 | 0.44715 | 0.69953 |
| O233 | 0.22946 | 0.45654 | 0.76208 |
| O234 | 0.357   | 0.67356 | 0.74952 |
| O235 | 0.3044  | 0.64721 | 0.92411 |
| O236 | 0.18866 | 0.64723 | 0.01812 |
| O237 | 0.08523 | 0.67305 | 0.90037 |
| O238 | 0.10248 | 0.65797 | 0.70577 |
| O239 | 0.22804 | 0.64241 | 0.76191 |
| O240 | 0.32199 | 0.54946 | 0.79239 |
| O241 | 0.08364 | 0.55125 | 0.82208 |
| O242 | 0.43197 | 0.37425 | 0.58472 |
| O243 | 0.40544 | 0.50399 | 0.57289 |
| O244 | 0.39831 | 0.63769 | 0.56899 |
| O245 | 0.19707 | 0.36598 | 0.62209 |
| O246 | 0.19921 | 0.49509 | 0.57582 |
| O247 | 0.19384 | 0.6293  | 0.56929 |



|      |          |         |         |
|------|----------|---------|---------|
| O248 | 0.99415  | 0.45432 | 0.78857 |
| O249 | 0.98319  | 0.63601 | 0.78585 |
| O250 | 0.14131  | 0.56477 | 0.21816 |
| O251 | 0.18274  | 0.55801 | 0.40468 |
| O252 | 0.29895  | 0.56366 | 0.49837 |
| O253 | 0.41454  | 0.5713  | 0.40354 |
| O254 | 0.39631  | 0.56523 | 0.20837 |
| O255 | 0.27007  | 0.54346 | 0.25779 |
| O256 | 0.13893  | 0.32571 | 0.25246 |
| O257 | 0.19135  | 0.35262 | 0.42691 |
| O258 | 0.30969  | 0.3542  | 0.51605 |
| O259 | 0.41386  | 0.3323  | 0.3978  |
| O260 | 0.39431  | 0.34322 | 0.20351 |
| O261 | 0.26974  | 0.35003 | 0.26743 |
| O262 | 0.1801   | 0.44824 | 0.2895  |
| O263 | 0.41479  | 0.45296 | 0.31354 |
| O264 | 0.06605  | 0.62594 | 0.08434 |
| O265 | 0.08295  | 0.49424 | 0.06976 |
| O266 | 0.11262  | 0.36356 | 0.06594 |
| O267 | 0.30155  | 0.63376 | 0.11987 |
| O268 | 0.3185   | 0.50276 | 0.08166 |
| O269 | 0.29747  | 0.36972 | 0.07364 |
| O270 | 0.51459  | 0.54029 | 0.28205 |
| O271 | 0.51411  | 0.36714 | 0.2789  |
| O272 | 0.44005  | 0.75045 | 0.64764 |
| O273 | 0.19405  | 0.74864 | 0.65071 |
| O274 | 0.2728   | 0.7502  | 0.04117 |
| O275 | 0.10769  | 0.75042 | 0.05634 |
| O276 | 0.06352  | 0.24993 | 0.13681 |
| O277 | 0.30664  | 0.2492  | 0.14849 |
| O278 | 0.22706  | 0.25036 | 0.54276 |
| O279 | 0.39152  | 0.25066 | 0.54943 |
| O280 | 0.56001  | 0.25148 | 0.34977 |
| O281 | 0.80202  | 0.24288 | 0.33804 |
| O282 | 0.72903  | 0.24805 | 0.95751 |
| O283 | 0.89093  | 0.25075 | 0.94385 |
| O284 | 0.93922  | 0.75122 | 0.86374 |
| O285 | 0.6858   | 0.75229 | 0.86184 |
| O286 | 0.77034  | 0.74582 | 0.44386 |
| O287 | 0.60637  | 0.74998 | 0.45065 |
| O288 | 0.97353  | 0.27806 | 0.42596 |
| O289 | 0.92483  | 0.18282 | 0.53597 |
| O290 | 0.8827   | 0.30423 | 0.55715 |
| O291 | -0.00055 | 0.26578 | 0.60792 |

|            |         |         |         |
|------------|---------|---------|---------|
| GA29       | 0.93106 | 0.4247  | 0.60883 |
| H293       | 0.94579 | 0.30406 | 0.37349 |
| H294       | 0.83645 | 0.33458 | 0.4964  |
| H295       | 0.88328 | 0.16567 | 0.50369 |
| H296       | 0.03831 | 0.29043 | 0.58386 |
| AL29       | 0.81689 | 0.32685 | 0.31879 |
| AL29       | 0.80153 | 0.47651 | 0.70654 |
| P299       | 0.94115 | 0.25938 | 0.52848 |
| <b>TS0</b> |         |         |         |
| SI2        | 0.42292 | 0.05919 | 0.64914 |
| SI3        | 0.30668 | 0.03046 | 0.79705 |
| SI4        | 0.28087 | 0.05774 | 0.01863 |
| SI5        | 0.12191 | 0.06348 | 0.0135  |
| SI6        | 0.06718 | 0.0294  | 0.80164 |
| SI7        | 0.18223 | 0.06101 | 0.66762 |
| SI8        | 0.42124 | 0.82731 | 0.67473 |
| SI9        | 0.30346 | 0.87122 | 0.80969 |
| SI10       | 0.26734 | 0.83072 | 0.02868 |
| SI11       | 0.11269 | 0.82753 | 0.01761 |
| SI12       | 0.06537 | 0.87161 | 0.8029  |
| SI13       | 0.1818  | 0.82712 | 0.67441 |
| SI14       | 0.07718 | 0.94213 | 0.15392 |
| SI15       | 0.19492 | 0.97062 | 0.29795 |
| SI16       | 0.21858 | 0.93943 | 0.52091 |
| SI17       | 0.37908 | 0.93354 | 0.51629 |
| SI18       | 0.43436 | 0.96896 | 0.30563 |
| SI19       | 0.31998 | 0.9392  | 0.16819 |
| SI20       | 0.08298 | 0.17323 | 0.16675 |
| SI21       | 0.19636 | 0.12996 | 0.30926 |
| SI22       | 0.23251 | 0.1704  | 0.5258  |
| SI23       | 0.38704 | 0.17367 | 0.51004 |
| SI24       | 0.43591 | 0.12739 | 0.29835 |
| SI25       | 0.31684 | 0.17    | 0.17311 |
| SI26       | 0.58015 | 0.55925 | 0.34658 |
| SI27       | 0.6888  | 0.53328 | 0.1908  |
| SI28       | 0.71596 | 0.55849 | 0.97381 |
| SI29       | 0.874   | 0.56536 | 0.98037 |
| SI30       | 0.93211 | 0.53033 | 0.19081 |
| SI31       | 0.81286 | 0.55684 | 0.32012 |
| SI32       | 0.58059 | 0.32948 | 0.32726 |
| SI33       | 0.69402 | 0.376   | 0.18524 |
| SI34       | 0.73016 | 0.32813 | 0.97119 |
| SI35       | 0.88451 | 0.32654 | 0.98438 |

|      |         |         |         |
|------|---------|---------|---------|
| SI36 | 0.93729 | 0.37193 | 0.19495 |
| SI37 | 0.92522 | 0.44101 | 0.8469  |
| SI38 | 0.78166 | 0.43723 | 0.47522 |
| SI39 | 0.62278 | 0.43506 | 0.4879  |
| SI40 | 0.56411 | 0.46924 | 0.6985  |
| SI41 | 0.67784 | 0.4352  | 0.83088 |
| SI42 | 0.91772 | 0.67566 | 0.82782 |
| SI43 | 0.80369 | 0.63768 | 0.68774 |
| SI44 | 0.76468 | 0.66762 | 0.46898 |
| SI45 | 0.61002 | 0.67285 | 0.48648 |
| SI46 | 0.56208 | 0.62717 | 0.69993 |
| SI47 | 0.68206 | 0.67527 | 0.82006 |
| SI48 | 0.57959 | 0.94249 | 0.35831 |
| SI49 | 0.69372 | 0.96681 | 0.20932 |
| SI50 | 0.72177 | 0.93904 | 0.98984 |
| SI51 | 0.88066 | 0.93571 | 0.99434 |
| SI52 | 0.93295 | 0.96935 | 0.20351 |
| SI53 | 0.81805 | 0.94354 | 0.34552 |
| SI54 | 0.57842 | 0.17419 | 0.33047 |
| SI55 | 0.69629 | 0.12254 | 0.19785 |
| SI56 | 0.73445 | 0.16808 | 0.97883 |
| SI57 | 0.88874 | 0.1726  | 0.98156 |
| SI58 | 0.93886 | 0.12673 | 0.19265 |
| SI59 | 0.8204  | 0.16556 | 0.32536 |
| SI60 | 0.92382 | 0.054   | 0.85333 |
| SI61 | 0.80252 | 0.02427 | 0.70883 |
| SI62 | 0.78327 | 0.06492 | 0.48917 |
| SI63 | 0.62232 | 0.07132 | 0.48896 |
| SI64 | 0.5688  | 0.03195 | 0.69984 |
| SI65 | 0.67953 | 0.05537 | 0.84695 |
| SI66 | 0.92033 | 0.82809 | 0.83552 |
| SI67 | 0.80361 | 0.86535 | 0.68849 |
| SI68 | 0.76795 | 0.82532 | 0.47235 |
| SI69 | 0.61365 | 0.82657 | 0.49383 |
| SI70 | 0.56539 | 0.87422 | 0.70345 |
| SI71 | 0.68327 | 0.83065 | 0.82975 |
| SI72 | 0.41894 | 0.44221 | 0.64874 |
| SI73 | 0.30601 | 0.46936 | 0.79739 |
| SI74 | 0.28367 | 0.44134 | 0.02117 |
| SI75 | 0.12567 | 0.43604 | 0.01266 |
| SI76 | 0.07342 | 0.4719  | 0.80278 |
| SI77 | 0.18449 | 0.44249 | 0.66181 |
| SI78 | 0.42022 | 0.67346 | 0.67191 |
| SI79 | 0.30262 | 0.62757 | 0.80564 |



|      |         |         |         |
|------|---------|---------|---------|
| SI80 | 0.26639 | 0.67033 | 0.02413 |
| SI81 | 0.11194 | 0.67426 | 0.01362 |
| SI82 | 0.06336 | 0.6298  | 0.80287 |
| SI83 | 0.18005 | 0.66923 | 0.67073 |
| SI84 | 0.07594 | 0.55674 | 0.14552 |
| SI85 | 0.19403 | 0.52821 | 0.29079 |
| SI86 | 0.21898 | 0.56255 | 0.51064 |
| SI87 | 0.37915 | 0.56895 | 0.51094 |
| SI88 | 0.43533 | 0.53149 | 0.30122 |
| SI89 | 0.32112 | 0.56084 | 0.16431 |
| SI90 | 0.08345 | 0.32647 | 0.16397 |
| SI91 | 0.19634 | 0.36913 | 0.30806 |
| SI92 | 0.23204 | 0.33045 | 0.52585 |
| SI93 | 0.38662 | 0.32779 | 0.51082 |
| SI94 | 0.43536 | 0.37391 | 0.2983  |
| SI95 | 0.31781 | 0.32784 | 0.17367 |
| O96  | 0.35933 | 0.06767 | 0.7234  |
| O97  | 0.31674 | 0.05836 | 0.90983 |
| O98  | 0.201   | 0.04677 | 0.00642 |
| O99  | 0.08957 | 0.06802 | 0.90301 |
| O100 | 0.10546 | 0.06124 | 0.706   |
| O101 | 0.23048 | 0.04627 | 0.7629  |
| O102 | 0.361   | 0.82721 | 0.7557  |
| O103 | 0.30529 | 0.85504 | 0.92799 |
| O104 | 0.18952 | 0.85416 | 0.02318 |
| O105 | 0.08655 | 0.83152 | 0.90344 |
| O106 | 0.10442 | 0.83868 | 0.70802 |
| O107 | 0.23015 | 0.85184 | 0.76545 |
| O108 | 0.31976 | 0.94998 | 0.79024 |
| O109 | 0.08589 | 0.95018 | 0.81332 |
| O110 | 0.43201 | 0.12721 | 0.58341 |
| O111 | 0.41393 | 0.99596 | 0.57389 |
| O112 | 0.39733 | 0.86366 | 0.57217 |
| O113 | 0.1995  | 0.1343  | 0.62206 |
| O114 | 0.19097 | 0.00319 | 0.58347 |
| O115 | 0.19731 | 0.86899 | 0.57306 |
| O116 | 0.98772 | 0.03927 | 0.78215 |
| O117 | 0.98528 | 0.86464 | 0.78623 |
| O118 | 0.14228 | 0.93299 | 0.22488 |
| O119 | 0.18562 | 0.94194 | 0.41032 |
| O120 | 0.2991  | 0.9447  | 0.5141  |
| O121 | 0.40783 | 0.92906 | 0.40361 |
| O122 | 0.39671 | 0.93997 | 0.20719 |
| O123 | 0.27104 | 0.95569 | 0.26221 |

|      |         |         |         |
|------|---------|---------|---------|
| O124 | 0.14142 | 0.17436 | 0.2504  |
| O125 | 0.19145 | 0.14808 | 0.42677 |
| O126 | 0.31007 | 0.14706 | 0.51327 |
| O127 | 0.41488 | 0.17053 | 0.39646 |
| O128 | 0.39431 | 0.15429 | 0.20173 |
| O129 | 0.27086 | 0.14792 | 0.26831 |
| O130 | 0.18028 | 0.05086 | 0.29198 |
| O131 | 0.41897 | 0.04876 | 0.31895 |
| O132 | 0.06645 | 0.87364 | 0.08963 |
| O133 | 0.08527 | 0.00477 | 0.0772  |
| O134 | 0.10974 | 0.13555 | 0.06689 |
| O135 | 0.30338 | 0.86507 | 0.12428 |
| O136 | 0.31132 | 0.99551 | 0.08175 |
| O137 | 0.29556 | 0.12882 | 0.07354 |
| O138 | 0.51385 | 0.95659 | 0.2907  |
| O139 | 0.51508 | 0.13786 | 0.27592 |
| O140 | 0.64203 | 0.57233 | 0.27094 |
| O141 | 0.67753 | 0.56515 | 0.08044 |
| O142 | 0.79546 | 0.55056 | 0.99455 |
| O143 | 0.91121 | 0.56797 | 0.08768 |
| O144 | 0.89033 | 0.56011 | 0.28488 |
| O145 | 0.76659 | 0.54475 | 0.22236 |
| O146 | 0.64028 | 0.33049 | 0.24636 |
| O147 | 0.6902  | 0.35115 | 0.07002 |
| O148 | 0.80797 | 0.35363 | 0.97637 |
| O149 | 0.91136 | 0.32969 | 0.09828 |
| O150 | 0.90207 | 0.34139 | 0.29481 |
| O151 | 0.76814 | 0.3678  | 0.22891 |
| O152 | 0.66956 | 0.45414 | 0.19244 |
| O153 | 0.91771 | 0.4504  | 0.17873 |
| O154 | 0.56665 | 0.62803 | 0.40867 |
| O155 | 0.59593 | 0.49915 | 0.42523 |
| O156 | 0.60496 | 0.36578 | 0.43017 |
| O157 | 0.79428 | 0.62676 | 0.37436 |
| O158 | 0.80388 | 0.49415 | 0.39691 |
| O159 | 0.80228 | 0.36235 | 0.43753 |
| O160 | 0.01047 | 0.54467 | 0.2148  |
| O161 | 0.01793 | 0.36542 | 0.20644 |
| O162 | 0.87188 | 0.42995 | 0.75299 |
| O163 | 0.82608 | 0.44889 | 0.57931 |
| O164 | 0.70345 | 0.443   | 0.50189 |
| O165 | 0.58795 | 0.43191 | 0.59655 |
| O166 | 0.59997 | 0.43721 | 0.79589 |
| O167 | 0.72528 | 0.44808 | 0.73599 |

|      |         |         |         |
|------|---------|---------|---------|
| O168 | 0.86244 | 0.68212 | 0.73984 |
| O169 | 0.80835 | 0.64883 | 0.5673  |
| O170 | 0.68708 | 0.64616 | 0.48765 |
| O171 | 0.57825 | 0.66679 | 0.59706 |
| O172 | 0.6047  | 0.66059 | 0.79027 |
| O173 | 0.73005 | 0.66446 | 0.723   |
| O174 | 0.81513 | 0.5606  | 0.71836 |
| O175 | 0.58225 | 0.54865 | 0.68811 |
| O176 | 0.93128 | 0.3734  | 0.91296 |
| O177 | 0.90474 | 0.5042  | 0.91421 |
| O178 | 0.88724 | 0.63608 | 0.92393 |
| O179 | 0.6932  | 0.36089 | 0.87564 |
| O180 | 0.68904 | 0.49209 | 0.91706 |
| O181 | 0.70377 | 0.62646 | 0.91073 |
| O182 | 0.48453 | 0.45881 | 0.71474 |
| O183 | 0.48281 | 0.63481 | 0.72459 |
| O184 | 0.64256 | 0.92901 | 0.2845  |
| O185 | 0.69245 | 0.92914 | 0.10189 |
| O186 | 0.80159 | 0.95374 | 0.99148 |
| O187 | 0.90548 | 0.92608 | 0.10883 |
| O188 | 0.89442 | 0.94827 | 0.30555 |
| O189 | 0.7692  | 0.96328 | 0.25329 |
| O190 | 0.64324 | 0.16849 | 0.25839 |
| O191 | 0.69903 | 0.1497  | 0.08408 |
| O192 | 0.81232 | 0.14463 | 0.9839  |
| O193 | 0.92004 | 0.16881 | 0.0928  |
| O194 | 0.89686 | 0.15596 | 0.2863  |
| O195 | 0.7696  | 0.12527 | 0.25079 |
| O196 | 0.67095 | 0.04491 | 0.19813 |
| O197 | 0.9207  | 0.04805 | 0.17694 |
| O198 | 0.56755 | 0.87582 | 0.42606 |
| O199 | 0.59277 | 0.00561 | 0.43261 |
| O200 | 0.59297 | 0.1389  | 0.43783 |
| O201 | 0.80318 | 0.86753 | 0.3831  |
| O202 | 0.80789 | 0.99518 | 0.43848 |
| O203 | 0.81949 | 0.13014 | 0.4376  |
| O204 | 0.01167 | 0.95433 | 0.22298 |
| O205 | 0.01824 | 0.13552 | 0.21429 |
| O206 | 0.8567  | 0.05428 | 0.78614 |
| O207 | 0.8067  | 0.06645 | 0.6051  |
| O208 | 0.70308 | 0.07131 | 0.47875 |
| O209 | 0.60009 | 0.07245 | 0.60526 |
| O210 | 0.60411 | 0.05592 | 0.80301 |
| O211 | 0.72841 | 0.03207 | 0.75615 |

|      |         |         |         |
|------|---------|---------|---------|
| O212 | 0.86045 | 0.82929 | 0.75475 |
| O213 | 0.80884 | 0.83624 | 0.57584 |
| O214 | 0.69127 | 0.85121 | 0.48739 |
| O215 | 0.58843 | 0.82837 | 0.609   |
| O216 | 0.60637 | 0.85042 | 0.80241 |
| O217 | 0.7298  | 0.8492  | 0.73352 |
| O218 | 0.81729 | 0.94567 | 0.68731 |
| O219 | 0.58152 | 0.95244 | 0.6792  |
| O220 | 0.9325  | 0.12748 | 0.90477 |
| O221 | 0.92095 | 0.99694 | 0.94071 |
| O222 | 0.89626 | 0.86571 | 0.9369  |
| O223 | 0.69799 | 0.13003 | 0.88656 |
| O224 | 0.68418 | 0.00287 | 0.9395  |
| O225 | 0.7079  | 0.87099 | 0.92777 |
| O226 | 0.48997 | 0.04774 | 0.71463 |
| O227 | 0.48578 | 0.86499 | 0.72331 |
| O228 | 0.35639 | 0.42958 | 0.72355 |
| O229 | 0.31318 | 0.43848 | 0.90861 |
| O230 | 0.20388 | 0.4563  | 0.02059 |
| O231 | 0.10358 | 0.43008 | 0.89634 |
| O232 | 0.10718 | 0.44921 | 0.69778 |
| O233 | 0.22963 | 0.45875 | 0.75979 |
| O234 | 0.35696 | 0.67302 | 0.74742 |
| O235 | 0.30398 | 0.64883 | 0.92198 |
| O236 | 0.18861 | 0.6471  | 0.01676 |
| O237 | 0.08524 | 0.67391 | 0.89929 |
| O238 | 0.10275 | 0.65752 | 0.70483 |
| O239 | 0.22849 | 0.64011 | 0.7589  |
| O240 | 0.32369 | 0.54908 | 0.79453 |
| O241 | 0.08315 | 0.55167 | 0.82304 |
| O242 | 0.43177 | 0.37438 | 0.58393 |
| O243 | 0.40411 | 0.50411 | 0.57344 |
| O244 | 0.39989 | 0.63777 | 0.56737 |
| O245 | 0.19827 | 0.36693 | 0.62185 |
| O246 | 0.19956 | 0.49551 | 0.57299 |
| O247 | 0.1929  | 0.62982 | 0.56652 |
| O248 | 0.99468 | 0.45471 | 0.78909 |
| O249 | 0.98338 | 0.6364  | 0.7847  |
| O250 | 0.14154 | 0.56414 | 0.21563 |
| O251 | 0.18321 | 0.5586  | 0.40202 |
| O252 | 0.29905 | 0.56556 | 0.49708 |
| O253 | 0.41501 | 0.57027 | 0.40309 |
| O254 | 0.39644 | 0.56546 | 0.20776 |
| O255 | 0.2702  | 0.54263 | 0.25523 |

|      |         |         |         |
|------|---------|---------|---------|
| O256 | 0.14041 | 0.32537 | 0.25    |
| O257 | 0.19138 | 0.35227 | 0.42604 |
| O258 | 0.30955 | 0.35418 | 0.51458 |
| O259 | 0.41426 | 0.33218 | 0.39748 |
| O260 | 0.39542 | 0.34243 | 0.20307 |
| O261 | 0.27083 | 0.35047 | 0.26768 |
| O262 | 0.18003 | 0.44791 | 0.28872 |
| O263 | 0.41518 | 0.45254 | 0.31158 |
| O264 | 0.06595 | 0.62596 | 0.08277 |
| O265 | 0.08196 | 0.4942  | 0.06734 |
| O266 | 0.11183 | 0.36364 | 0.06434 |
| O267 | 0.30182 | 0.6333  | 0.11766 |
| O268 | 0.31995 | 0.5025  | 0.0796  |
| O269 | 0.29802 | 0.36955 | 0.07389 |
| O270 | 0.51471 | 0.54007 | 0.28118 |
| O271 | 0.51531 | 0.36731 | 0.28079 |
| O272 | 0.44045 | 0.75046 | 0.64747 |
| O273 | 0.19465 | 0.74821 | 0.65124 |
| O274 | 0.27238 | 0.75027 | 0.04156 |
| O275 | 0.10787 | 0.75038 | 0.05621 |
| O276 | 0.06411 | 0.24976 | 0.13556 |
| O277 | 0.30676 | 0.24905 | 0.14883 |
| O278 | 0.22772 | 0.25045 | 0.54301 |
| O279 | 0.39142 | 0.25068 | 0.54909 |
| O280 | 0.56144 | 0.25226 | 0.35284 |
| O281 | 0.80088 | 0.24269 | 0.33512 |
| O282 | 0.72876 | 0.24754 | 0.95794 |
| O283 | 0.89031 | 0.25006 | 0.94366 |
| O284 | 0.93838 | 0.75082 | 0.86378 |
| O285 | 0.68907 | 0.75199 | 0.85857 |
| O286 | 0.76983 | 0.74674 | 0.44175 |
| O287 | 0.60658 | 0.75068 | 0.45111 |
| O288 | 0.95605 | 0.26438 | 0.42442 |
| O289 | 0.92158 | 0.19147 | 0.56849 |
| O290 | 0.87827 | 0.31296 | 0.56118 |
| O291 | 0.99779 | 0.29061 | 0.60362 |
| GA29 | 0.91365 | 0.40745 | 0.61939 |
| H293 | 0.93833 | 0.29906 | 0.37355 |
| H294 | 0.84253 | 0.32742 | 0.50476 |
| H295 | 0.88956 | 0.16894 | 0.52295 |
| H296 | 0.98508 | 0.36838 | 0.60565 |
| AL29 | 0.81546 | 0.32683 | 0.31639 |
| AL29 | 0.80165 | 0.47689 | 0.70303 |
| P299 | 0.94222 | 0.2648  | 0.53854 |

**P/Ga/ZSM-5 ([GaH]<sup>2+</sup> site)**

|      |         |         |         |
|------|---------|---------|---------|
| SI2  | 0.42306 | 0.05921 | 0.64909 |
| SI3  | 0.30677 | 0.03046 | 0.79698 |
| SI4  | 0.28085 | 0.05765 | 0.01859 |
| SI5  | 0.12192 | 0.06314 | 0.01341 |
| SI6  | 0.06709 | 0.02913 | 0.80155 |
| SI7  | 0.18222 | 0.06081 | 0.6675  |
| SI8  | 0.42132 | 0.82727 | 0.6749  |
| SI9  | 0.30346 | 0.87122 | 0.80968 |
| SI10 | 0.26727 | 0.83078 | 0.02869 |
| SI11 | 0.11267 | 0.82749 | 0.01779 |
| SI12 | 0.06519 | 0.87117 | 0.80292 |
| SI13 | 0.18182 | 0.8269  | 0.67448 |
| SI14 | 0.07709 | 0.94201 | 0.15408 |
| SI15 | 0.19494 | 0.97053 | 0.29799 |
| SI16 | 0.21863 | 0.93915 | 0.52095 |
| SI17 | 0.37914 | 0.93348 | 0.5164  |
| SI18 | 0.43436 | 0.96892 | 0.30571 |
| SI19 | 0.32004 | 0.9392  | 0.16816 |
| SI20 | 0.0832  | 0.17307 | 0.16646 |
| SI21 | 0.19646 | 0.12986 | 0.30925 |
| SI22 | 0.23253 | 0.17039 | 0.52584 |
| SI23 | 0.38707 | 0.17372 | 0.51007 |
| SI24 | 0.4359  | 0.12732 | 0.29834 |
| SI25 | 0.31686 | 0.16987 | 0.17309 |
| SI26 | 0.57902 | 0.55972 | 0.34572 |
| SI27 | 0.68836 | 0.53334 | 0.19045 |
| SI28 | 0.71548 | 0.5583  | 0.97422 |
| SI29 | 0.87343 | 0.5632  | 0.97737 |
| SI30 | 0.93218 | 0.5292  | 0.18939 |
| SI31 | 0.81271 | 0.55804 | 0.31752 |
| SI32 | 0.58066 | 0.32932 | 0.32705 |
| SI33 | 0.69419 | 0.37577 | 0.18474 |
| SI34 | 0.73001 | 0.32771 | 0.97142 |
| SI35 | 0.8844  | 0.3263  | 0.98637 |
| SI36 | 0.93747 | 0.37074 | 0.19765 |
| SI37 | 0.92579 | 0.43844 | 0.84454 |
| SI38 | 0.77946 | 0.44142 | 0.47515 |
| SI39 | 0.62062 | 0.4358  | 0.48662 |
| SI40 | 0.56452 | 0.46935 | 0.69832 |
| SI41 | 0.67957 | 0.43496 | 0.8307  |
| SI42 | 0.91746 | 0.67483 | 0.8272  |
| SI43 | 0.80454 | 0.63491 | 0.68733 |



|      |         |         |         |
|------|---------|---------|---------|
| SI44 | 0.76471 | 0.66725 | 0.46897 |
| SI45 | 0.60995 | 0.67293 | 0.48592 |
| SI46 | 0.56232 | 0.62733 | 0.69959 |
| SI47 | 0.68268 | 0.67433 | 0.81942 |
| SI48 | 0.57956 | 0.94254 | 0.35864 |
| SI49 | 0.69402 | 0.96679 | 0.20998 |
| SI50 | 0.72172 | 0.93844 | 0.99022 |
| SI51 | 0.88069 | 0.93549 | 0.99456 |
| SI52 | 0.93284 | 0.96945 | 0.20414 |
| SI53 | 0.81821 | 0.94353 | 0.34653 |
| SI54 | 0.57843 | 0.17403 | 0.33078 |
| SI55 | 0.69667 | 0.1226  | 0.19842 |
| SI56 | 0.73453 | 0.16774 | 0.97922 |
| SI57 | 0.88874 | 0.17244 | 0.98209 |
| SI58 | 0.93897 | 0.12697 | 0.19341 |
| SI59 | 0.82075 | 0.16563 | 0.3266  |
| SI60 | 0.92383 | 0.05394 | 0.85366 |
| SI61 | 0.80254 | 0.02425 | 0.70917 |
| SI62 | 0.78333 | 0.06505 | 0.48968 |
| SI63 | 0.6224  | 0.0713  | 0.48923 |
| SI64 | 0.56901 | 0.03168 | 0.70008 |
| SI65 | 0.67952 | 0.05481 | 0.84754 |
| SI66 | 0.92014 | 0.82752 | 0.83602 |
| SI67 | 0.80367 | 0.8657  | 0.68875 |
| SI68 | 0.76792 | 0.82519 | 0.47301 |
| SI69 | 0.61369 | 0.8266  | 0.4941  |
| SI70 | 0.5655  | 0.87388 | 0.70394 |
| SI71 | 0.68353 | 0.83038 | 0.82968 |
| SI72 | 0.41939 | 0.44223 | 0.64925 |
| SI73 | 0.30626 | 0.46922 | 0.79734 |
| SI74 | 0.28378 | 0.4412  | 0.02124 |
| SI75 | 0.12598 | 0.43612 | 0.01258 |
| SI76 | 0.07436 | 0.47165 | 0.80258 |
| SI77 | 0.18496 | 0.44282 | 0.66079 |
| SI78 | 0.42048 | 0.6734  | 0.67175 |
| SI79 | 0.30278 | 0.62736 | 0.80531 |
| SI80 | 0.26623 | 0.67042 | 0.02374 |
| SI81 | 0.11181 | 0.67424 | 0.01346 |
| SI82 | 0.06337 | 0.62963 | 0.80276 |
| SI83 | 0.18015 | 0.66891 | 0.67036 |
| SI84 | 0.07565 | 0.55657 | 0.14481 |
| SI85 | 0.19386 | 0.52798 | 0.29004 |
| SI86 | 0.2192  | 0.56279 | 0.50972 |
| SI87 | 0.37943 | 0.56889 | 0.51102 |

|      |         |         |         |
|------|---------|---------|---------|
| SI88 | 0.43517 | 0.53162 | 0.30053 |
| SI89 | 0.32095 | 0.56073 | 0.16341 |
| SI90 | 0.08376 | 0.3262  | 0.16373 |
| SI91 | 0.19655 | 0.36893 | 0.30789 |
| SI92 | 0.23225 | 0.3304  | 0.52566 |
| SI93 | 0.38693 | 0.32793 | 0.51075 |
| SI94 | 0.4357  | 0.3738  | 0.29788 |
| SI95 | 0.31798 | 0.32769 | 0.17372 |
| O96  | 0.35954 | 0.06767 | 0.72351 |
| O97  | 0.31669 | 0.05842 | 0.90976 |
| O98  | 0.201   | 0.04644 | 0.00637 |
| O99  | 0.0896  | 0.06767 | 0.90292 |
| O100 | 0.10543 | 0.061   | 0.70594 |
| O101 | 0.23059 | 0.04629 | 0.76265 |
| O102 | 0.361   | 0.82719 | 0.75575 |
| O103 | 0.30519 | 0.85515 | 0.92801 |
| O104 | 0.18945 | 0.85431 | 0.02333 |
| O105 | 0.08659 | 0.83145 | 0.90361 |
| O106 | 0.10443 | 0.8384  | 0.70811 |
| O107 | 0.23015 | 0.8519  | 0.76539 |
| O108 | 0.31982 | 0.94999 | 0.79022 |
| O109 | 0.08541 | 0.94986 | 0.81305 |
| O110 | 0.43209 | 0.12725 | 0.58334 |
| O111 | 0.41396 | 0.99599 | 0.57381 |
| O112 | 0.39753 | 0.86369 | 0.57236 |
| O113 | 0.19919 | 0.13414 | 0.62178 |
| O114 | 0.19093 | 0.00295 | 0.58342 |
| O115 | 0.19725 | 0.86873 | 0.57304 |
| O116 | 0.98764 | 0.03942 | 0.78216 |
| O117 | 0.98516 | 0.86378 | 0.78634 |
| O118 | 0.14221 | 0.93294 | 0.22503 |
| O119 | 0.18575 | 0.94172 | 0.4103  |
| O120 | 0.29913 | 0.94451 | 0.51442 |
| O121 | 0.40774 | 0.929   | 0.40364 |
| O122 | 0.39675 | 0.93994 | 0.20721 |
| O123 | 0.27104 | 0.95577 | 0.2621  |
| O124 | 0.1416  | 0.17423 | 0.25016 |
| O125 | 0.19148 | 0.14819 | 0.4267  |
| O126 | 0.31009 | 0.14706 | 0.51359 |
| O127 | 0.4147  | 0.1705  | 0.39635 |
| O128 | 0.39434 | 0.15411 | 0.20157 |
| O129 | 0.27098 | 0.14773 | 0.2684  |
| O130 | 0.18021 | 0.05079 | 0.29222 |
| O131 | 0.41895 | 0.04871 | 0.31902 |

|      |         |         |         |
|------|---------|---------|---------|
| O132 | 0.06633 | 0.87348 | 0.08987 |
| O133 | 0.08518 | 0.00457 | 0.07722 |
| O134 | 0.10974 | 0.1352  | 0.06672 |
| O135 | 0.30338 | 0.86509 | 0.12428 |
| O136 | 0.31145 | 0.9955  | 0.08168 |
| O137 | 0.29534 | 0.12875 | 0.07358 |
| O138 | 0.51385 | 0.95655 | 0.29087 |
| O139 | 0.51511 | 0.1377  | 0.2761  |
| O140 | 0.642   | 0.57161 | 0.27185 |
| O141 | 0.67607 | 0.5648  | 0.08014 |
| O142 | 0.79493 | 0.55067 | 0.9959  |
| O143 | 0.91305 | 0.56329 | 0.08283 |
| O144 | 0.8898  | 0.56163 | 0.28088 |
| O145 | 0.76616 | 0.54626 | 0.22008 |
| O146 | 0.64119 | 0.33041 | 0.24752 |
| O147 | 0.68943 | 0.3504  | 0.06999 |
| O148 | 0.80784 | 0.35328 | 0.97754 |
| O149 | 0.9106  | 0.32892 | 0.10084 |
| O150 | 0.90286 | 0.34012 | 0.29816 |
| O151 | 0.76897 | 0.36726 | 0.2262  |
| O152 | 0.67018 | 0.45393 | 0.19268 |
| O153 | 0.91753 | 0.44913 | 0.18226 |
| O154 | 0.56631 | 0.62861 | 0.40785 |
| O155 | 0.59153 | 0.49906 | 0.42457 |
| O156 | 0.60413 | 0.36575 | 0.4302  |
| O157 | 0.79429 | 0.62739 | 0.37328 |
| O158 | 0.80325 | 0.49439 | 0.39241 |
| O159 | 0.79669 | 0.36414 | 0.43361 |
| O160 | 0.0103  | 0.54418 | 0.21411 |
| O161 | 0.01819 | 0.36453 | 0.20726 |
| O162 | 0.87613 | 0.4235  | 0.74665 |
| O163 | 0.82372 | 0.44837 | 0.5761  |
| O164 | 0.70092 | 0.44636 | 0.49789 |
| O165 | 0.58719 | 0.43185 | 0.596   |
| O166 | 0.60204 | 0.43731 | 0.79395 |
| O167 | 0.72938 | 0.4469  | 0.73881 |
| O168 | 0.86222 | 0.68109 | 0.73921 |
| O169 | 0.8081  | 0.64714 | 0.56688 |
| O170 | 0.68692 | 0.64604 | 0.48677 |
| O171 | 0.57822 | 0.66685 | 0.59653 |
| O172 | 0.60505 | 0.6608  | 0.78975 |
| O173 | 0.73054 | 0.66069 | 0.72317 |
| O174 | 0.81809 | 0.55809 | 0.71745 |
| O175 | 0.58232 | 0.5488  | 0.68758 |

|      |         |         |         |
|------|---------|---------|---------|
| O176 | 0.9317  | 0.37319 | 0.91571 |
| O177 | 0.90027 | 0.50243 | 0.90628 |
| O178 | 0.88742 | 0.63451 | 0.92302 |
| O179 | 0.69304 | 0.36038 | 0.87609 |
| O180 | 0.68906 | 0.49177 | 0.91745 |
| O181 | 0.70326 | 0.62653 | 0.91182 |
| O182 | 0.48498 | 0.45871 | 0.71548 |
| O183 | 0.4831  | 0.63499 | 0.7247  |
| O184 | 0.64261 | 0.92913 | 0.28495 |
| O185 | 0.69299 | 0.9289  | 0.1027  |
| O186 | 0.80156 | 0.95332 | 0.99092 |
| O187 | 0.9051  | 0.92642 | 0.10938 |
| O188 | 0.89456 | 0.94821 | 0.30633 |
| O189 | 0.76939 | 0.96345 | 0.25432 |
| O190 | 0.64345 | 0.16829 | 0.25909 |
| O191 | 0.6992  | 0.14965 | 0.08463 |
| O192 | 0.81242 | 0.14422 | 0.98429 |
| O193 | 0.92001 | 0.16868 | 0.09338 |
| O194 | 0.8974  | 0.15691 | 0.28728 |
| O195 | 0.77009 | 0.1259  | 0.25109 |
| O196 | 0.67149 | 0.04493 | 0.19861 |
| O197 | 0.92053 | 0.04831 | 0.17843 |
| O198 | 0.56753 | 0.87597 | 0.42659 |
| O199 | 0.59263 | 0.00572 | 0.43285 |
| O200 | 0.59286 | 0.13891 | 0.43832 |
| O201 | 0.80323 | 0.86749 | 0.38389 |
| O202 | 0.80824 | 0.99516 | 0.4396  |
| O203 | 0.81967 | 0.13005 | 0.43821 |
| O204 | 0.01161 | 0.95433 | 0.22311 |
| O205 | 0.01844 | 0.13567 | 0.21457 |
| O206 | 0.85672 | 0.05435 | 0.78643 |
| O207 | 0.80635 | 0.06706 | 0.60589 |
| O208 | 0.70313 | 0.07125 | 0.47847 |
| O209 | 0.60066 | 0.07219 | 0.60576 |
| O210 | 0.60415 | 0.05564 | 0.80341 |
| O211 | 0.72851 | 0.03134 | 0.75695 |
| O212 | 0.86005 | 0.82947 | 0.75565 |
| O213 | 0.80881 | 0.83611 | 0.57644 |
| O214 | 0.69129 | 0.8513  | 0.48775 |
| O215 | 0.58847 | 0.8282  | 0.60929 |
| O216 | 0.60643 | 0.84977 | 0.80281 |
| O217 | 0.72965 | 0.85077 | 0.73382 |
| O218 | 0.81796 | 0.94594 | 0.68656 |
| O219 | 0.58167 | 0.95213 | 0.67976 |

|      |         |         |         |
|------|---------|---------|---------|
| O220 | 0.93256 | 0.12739 | 0.90526 |
| O221 | 0.92099 | 0.99676 | 0.94085 |
| O222 | 0.89672 | 0.86538 | 0.93764 |
| O223 | 0.69806 | 0.12942 | 0.88724 |
| O224 | 0.68389 | 0.00219 | 0.94002 |
| O225 | 0.70756 | 0.87015 | 0.92869 |
| O226 | 0.49017 | 0.0477  | 0.71436 |
| O227 | 0.48584 | 0.86487 | 0.72373 |
| O228 | 0.35692 | 0.42933 | 0.72409 |
| O229 | 0.31251 | 0.43784 | 0.90833 |
| O230 | 0.20407 | 0.45651 | 0.02228 |
| O231 | 0.10549 | 0.43002 | 0.89567 |
| O232 | 0.10782 | 0.45005 | 0.69698 |
| O233 | 0.23013 | 0.45919 | 0.7586  |
| O234 | 0.35705 | 0.67279 | 0.74693 |
| O235 | 0.30371 | 0.64926 | 0.92139 |
| O236 | 0.18848 | 0.6471  | 0.0167  |
| O237 | 0.08526 | 0.67394 | 0.89905 |
| O238 | 0.10295 | 0.65709 | 0.70477 |
| O239 | 0.22874 | 0.6394  | 0.75802 |
| O240 | 0.32421 | 0.5489  | 0.79536 |
| O241 | 0.08273 | 0.55145 | 0.82367 |
| O242 | 0.43196 | 0.37448 | 0.58405 |
| O243 | 0.40409 | 0.50419 | 0.5742  |
| O244 | 0.40053 | 0.63775 | 0.56702 |
| O245 | 0.19844 | 0.36702 | 0.62148 |
| O246 | 0.2001  | 0.49541 | 0.57148 |
| O247 | 0.19274 | 0.62985 | 0.56578 |
| O248 | 0.99606 | 0.45246 | 0.78955 |
| O249 | 0.98354 | 0.63636 | 0.78418 |
| O250 | 0.14127 | 0.56368 | 0.21489 |
| O251 | 0.18358 | 0.55894 | 0.401   |
| O252 | 0.29933 | 0.56608 | 0.49685 |
| O253 | 0.41528 | 0.56968 | 0.40316 |
| O254 | 0.39591 | 0.5657  | 0.2077  |
| O255 | 0.2699  | 0.54205 | 0.25382 |
| O256 | 0.14095 | 0.32494 | 0.2494  |
| O257 | 0.19147 | 0.35187 | 0.4258  |
| O258 | 0.30974 | 0.35408 | 0.51424 |
| O259 | 0.41478 | 0.33241 | 0.3975  |
| O260 | 0.39561 | 0.34207 | 0.203   |
| O261 | 0.27114 | 0.35044 | 0.26783 |
| O262 | 0.17991 | 0.44765 | 0.28887 |
| O263 | 0.41571 | 0.45249 | 0.31077 |

|                                    |         |         |         |
|------------------------------------|---------|---------|---------|
| O264                               | 0.06575 | 0.62601 | 0.08258 |
| O265                               | 0.08163 | 0.49427 | 0.0661  |
| O266                               | 0.11164 | 0.36379 | 0.06419 |
| O267                               | 0.30174 | 0.63325 | 0.11701 |
| O268                               | 0.32065 | 0.5025  | 0.07848 |
| O269                               | 0.2982  | 0.36946 | 0.07404 |
| O270                               | 0.51415 | 0.54151 | 0.27863 |
| O271                               | 0.51557 | 0.36693 | 0.2796  |
| O272                               | 0.44051 | 0.75047 | 0.64746 |
| O273                               | 0.19477 | 0.74798 | 0.65156 |
| O274                               | 0.27221 | 0.75034 | 0.04149 |
| O275                               | 0.10788 | 0.75033 | 0.05625 |
| O276                               | 0.06452 | 0.24955 | 0.1348  |
| O277                               | 0.30673 | 0.24892 | 0.1489  |
| O278                               | 0.22766 | 0.25042 | 0.5433  |
| O279                               | 0.39155 | 0.25075 | 0.54893 |
| O280                               | 0.56144 | 0.25215 | 0.35262 |
| O281                               | 0.80113 | 0.24287 | 0.33733 |
| O282                               | 0.72897 | 0.24712 | 0.95803 |
| O283                               | 0.89031 | 0.25    | 0.94478 |
| O284                               | 0.93752 | 0.75006 | 0.86393 |
| O285                               | 0.69076 | 0.75145 | 0.85589 |
| O286                               | 0.76993 | 0.74656 | 0.44285 |
| O287                               | 0.60668 | 0.75085 | 0.45095 |
| O288                               | 0.96137 | 0.27027 | 0.44443 |
| O289                               | 0.92059 | 0.19953 | 0.58664 |
| O290                               | 0.87006 | 0.31914 | 0.55988 |
| O291                               | 0.97929 | 0.31051 | 0.6295  |
| GA29                               | 0.92084 | 0.3973  | 0.61989 |
| H293                               | 0.9425  | 0.30027 | 0.38957 |
| H294                               | 0.82568 | 0.33818 | 0.48977 |
| H295                               | 0.8947  | 0.17297 | 0.53777 |
| H296                               | 0.96707 | 0.44836 | 0.56706 |
| AL29                               | 0.81601 | 0.32613 | 0.3132  |
| AL29                               | 0.8054  | 0.47395 | 0.69958 |
| P299                               | 0.93505 | 0.27392 | 0.55433 |
| <b>C<sub>3</sub>H<sub>8</sub>*</b> |         |         |         |
| SI2                                | 0.42591 | 0.05796 | 0.64677 |
| SI3                                | 0.30832 | 0.027   | 0.79146 |
| SI4                                | 0.28295 | 0.05549 | 0.01448 |
| SI5                                | 0.12388 | 0.06081 | 0.0131  |
| SI6                                | 0.06951 | 0.02877 | 0.80235 |
| SI7                                | 0.18204 | 0.05606 | 0.6602  |



|      |         |         |         |
|------|---------|---------|---------|
| SI8  | 0.42229 | 0.82511 | 0.67527 |
| SI9  | 0.30631 | 0.86907 | 0.81066 |
| SI10 | 0.26929 | 0.82986 | 0.03029 |
| SI11 | 0.11502 | 0.82551 | 0.01777 |
| SI12 | 0.06647 | 0.87085 | 0.80422 |
| SI13 | 0.18359 | 0.82709 | 0.67571 |
| SI14 | 0.0782  | 0.94113 | 0.15175 |
| SI15 | 0.19796 | 0.97186 | 0.29631 |
| SI16 | 0.21998 | 0.93625 | 0.51719 |
| SI17 | 0.38026 | 0.93275 | 0.51679 |
| SI18 | 0.43554 | 0.96641 | 0.30734 |
| SI19 | 0.32331 | 0.94081 | 0.16339 |
| SI20 | 0.08564 | 0.17147 | 0.16784 |
| SI21 | 0.19984 | 0.13093 | 0.31187 |
| SI22 | 0.2356  | 0.17148 | 0.52978 |
| SI23 | 0.38975 | 0.17321 | 0.51035 |
| SI24 | 0.43831 | 0.12419 | 0.30043 |
| SI25 | 0.32099 | 0.1655  | 0.17109 |
| SI26 | 0.57604 | 0.5562  | 0.35433 |
| SI27 | 0.69294 | 0.52748 | 0.20471 |
| SI28 | 0.71334 | 0.55948 | 0.98909 |
| SI29 | 0.87258 | 0.56221 | 0.97895 |
| SI30 | 0.93214 | 0.52622 | 0.19035 |
| SI31 | 0.81969 | 0.55255 | 0.33407 |
| SI32 | 0.58215 | 0.32796 | 0.33362 |
| SI33 | 0.69737 | 0.37219 | 0.18965 |
| SI34 | 0.73021 | 0.32506 | 0.97657 |
| SI35 | 0.8845  | 0.32498 | 0.99403 |
| SI36 | 0.93837 | 0.3681  | 0.20307 |
| SI37 | 0.92588 | 0.43656 | 0.85103 |
| SI38 | 0.77632 | 0.43974 | 0.48426 |
| SI39 | 0.61788 | 0.4355  | 0.4905  |
| SI40 | 0.5681  | 0.46921 | 0.70375 |
| SI41 | 0.67369 | 0.44148 | 0.85389 |
| SI42 | 0.917   | 0.67499 | 0.8311  |
| SI43 | 0.80642 | 0.63266 | 0.69111 |
| SI44 | 0.76724 | 0.66697 | 0.47104 |
| SI45 | 0.61252 | 0.67201 | 0.4875  |
| SI46 | 0.56466 | 0.62698 | 0.70185 |
| SI47 | 0.68316 | 0.67031 | 0.82569 |
| SI48 | 0.58107 | 0.94206 | 0.36147 |
| SI49 | 0.6983  | 0.96734 | 0.21433 |
| SI50 | 0.72278 | 0.93378 | 0.99425 |
| SI51 | 0.88217 | 0.93493 | 0.99738 |

|      |         |         |         |
|------|---------|---------|---------|
| SI52 | 0.93395 | 0.96924 | 0.20803 |
| SI53 | 0.82207 | 0.94359 | 0.35425 |
| SI54 | 0.58035 | 0.17222 | 0.33646 |
| SI55 | 0.70007 | 0.1236  | 0.20209 |
| SI56 | 0.7353  | 0.16782 | 0.98211 |
| SI57 | 0.88969 | 0.17199 | 0.98593 |
| SI58 | 0.94081 | 0.12713 | 0.1982  |
| SI59 | 0.82331 | 0.16623 | 0.33183 |
| SI60 | 0.9254  | 0.05384 | 0.85715 |
| SI61 | 0.80319 | 0.02356 | 0.71314 |
| SI62 | 0.78441 | 0.06476 | 0.49387 |
| SI63 | 0.62396 | 0.06961 | 0.49286 |
| SI64 | 0.57123 | 0.02872 | 0.70354 |
| SI65 | 0.67973 | 0.05072 | 0.85472 |
| SI66 | 0.92237 | 0.82755 | 0.84056 |
| SI67 | 0.80411 | 0.86603 | 0.69412 |
| SI68 | 0.77052 | 0.8237  | 0.47845 |
| SI69 | 0.61609 | 0.82528 | 0.49657 |
| SI70 | 0.56657 | 0.87051 | 0.70697 |
| SI71 | 0.68415 | 0.82771 | 0.83367 |
| SI72 | 0.42349 | 0.44484 | 0.63871 |
| SI73 | 0.30502 | 0.47026 | 0.7885  |
| SI74 | 0.28607 | 0.432   | 0.00679 |
| SI75 | 0.12675 | 0.43176 | 0.0036  |
| SI76 | 0.0723  | 0.46877 | 0.79506 |
| SI77 | 0.18276 | 0.4472  | 0.64766 |
| SI78 | 0.4244  | 0.67063 | 0.66016 |
| SI79 | 0.30195 | 0.62717 | 0.79529 |
| SI80 | 0.27096 | 0.67261 | 0.01107 |
| SI81 | 0.11641 | 0.67165 | 0.00903 |
| SI82 | 0.0621  | 0.62782 | 0.79907 |
| SI83 | 0.17863 | 0.66808 | 0.66533 |
| SI84 | 0.07905 | 0.55207 | 0.13991 |
| SI85 | 0.20324 | 0.52649 | 0.28356 |
| SI86 | 0.22335 | 0.56828 | 0.50548 |
| SI87 | 0.38362 | 0.5697  | 0.50238 |
| SI88 | 0.4334  | 0.52968 | 0.29026 |
| SI89 | 0.3267  | 0.55482 | 0.13869 |
| SI90 | 0.08443 | 0.32573 | 0.15813 |
| SI91 | 0.2042  | 0.36614 | 0.30217 |
| SI92 | 0.23509 | 0.32798 | 0.52157 |
| SI93 | 0.38964 | 0.32722 | 0.50675 |
| SI94 | 0.43927 | 0.3717  | 0.29345 |
| SI95 | 0.32499 | 0.32384 | 0.16521 |

|      |         |         |         |
|------|---------|---------|---------|
| O96  | 0.36129 | 0.06523 | 0.71943 |
| O97  | 0.31263 | 0.05994 | 0.902   |
| O98  | 0.20284 | 0.0421  | 0.01301 |
| O99  | 0.09629 | 0.06897 | 0.90008 |
| O100 | 0.1063  | 0.05737 | 0.70313 |
| O101 | 0.23255 | 0.03596 | 0.75048 |
| O102 | 0.36184 | 0.82261 | 0.75604 |
| O103 | 0.30747 | 0.852   | 0.92869 |
| O104 | 0.19152 | 0.85324 | 0.02241 |
| O105 | 0.08765 | 0.8303  | 0.90428 |
| O106 | 0.10638 | 0.84006 | 0.70868 |
| O107 | 0.2324  | 0.85369 | 0.7651  |
| O108 | 0.32647 | 0.94731 | 0.79311 |
| O109 | 0.08591 | 0.94942 | 0.81747 |
| O110 | 0.4355  | 0.12683 | 0.58292 |
| O111 | 0.41781 | 0.99565 | 0.56937 |
| O112 | 0.39831 | 0.86374 | 0.57474 |
| O113 | 0.19995 | 0.13039 | 0.61925 |
| O114 | 0.18619 | 0.00094 | 0.57099 |
| O115 | 0.19929 | 0.86653 | 0.57214 |
| O116 | 0.98991 | 0.03996 | 0.78694 |
| O117 | 0.98665 | 0.86219 | 0.78612 |
| O118 | 0.14452 | 0.93783 | 0.22094 |
| O119 | 0.19299 | 0.93342 | 0.40298 |
| O120 | 0.30041 | 0.94573 | 0.51983 |
| O121 | 0.40602 | 0.92529 | 0.40254 |
| O122 | 0.3991  | 0.94047 | 0.20613 |
| O123 | 0.27325 | 0.96375 | 0.25288 |
| O124 | 0.14484 | 0.17344 | 0.25009 |
| O125 | 0.19664 | 0.15702 | 0.42599 |
| O126 | 0.31279 | 0.14697 | 0.51779 |
| O127 | 0.41491 | 0.16927 | 0.39536 |
| O128 | 0.39786 | 0.14749 | 0.20071 |
| O129 | 0.27382 | 0.14444 | 0.26551 |
| O130 | 0.18149 | 0.05147 | 0.30735 |
| O131 | 0.42193 | 0.04607 | 0.32511 |
| O132 | 0.0694  | 0.87013 | 0.09287 |
| O133 | 0.08314 | 0.00143 | 0.06989 |
| O134 | 0.11121 | 0.1318  | 0.06913 |
| O135 | 0.30452 | 0.86579 | 0.1253  |
| O136 | 0.31912 | 0.99314 | 0.07061 |
| O137 | 0.29872 | 0.12571 | 0.07088 |
| O138 | 0.51495 | 0.95317 | 0.29365 |
| O139 | 0.5178  | 0.13514 | 0.28095 |

|      |         |         |         |
|------|---------|---------|---------|
| O140 | 0.64397 | 0.55872 | 0.28905 |
| O141 | 0.68846 | 0.57235 | 0.10335 |
| O142 | 0.79364 | 0.54576 | 0.98578 |
| O143 | 0.90533 | 0.56273 | 0.0895  |
| O144 | 0.8947  | 0.55643 | 0.28848 |
| O145 | 0.76941 | 0.53096 | 0.24502 |
| O146 | 0.64716 | 0.331   | 0.26289 |
| O147 | 0.69111 | 0.33707 | 0.08067 |
| O148 | 0.80773 | 0.35141 | 0.98457 |
| O149 | 0.9092  | 0.32425 | 0.10938 |
| O150 | 0.905   | 0.34081 | 0.30644 |
| O151 | 0.77269 | 0.36827 | 0.23039 |
| O152 | 0.67225 | 0.45009 | 0.18275 |
| O153 | 0.91855 | 0.44608 | 0.18209 |
| O154 | 0.5673  | 0.62759 | 0.41159 |
| O155 | 0.57674 | 0.49622 | 0.43766 |
| O156 | 0.59856 | 0.36402 | 0.44023 |
| O157 | 0.80023 | 0.62528 | 0.37938 |
| O158 | 0.81766 | 0.49535 | 0.42199 |
| O159 | 0.79468 | 0.36329 | 0.43903 |
| O160 | 0.01137 | 0.54067 | 0.20396 |
| O161 | 0.01931 | 0.36124 | 0.20793 |
| O162 | 0.86867 | 0.42009 | 0.76313 |
| O163 | 0.80253 | 0.43468 | 0.59828 |
| O164 | 0.69714 | 0.45229 | 0.47436 |
| O165 | 0.60049 | 0.43027 | 0.6081  |
| O166 | 0.59845 | 0.43966 | 0.8069  |
| O167 | 0.7259  | 0.46681 | 0.7719  |
| O168 | 0.85979 | 0.68239 | 0.74606 |
| O169 | 0.80776 | 0.65058 | 0.5726  |
| O170 | 0.68936 | 0.64489 | 0.48477 |
| O171 | 0.58349 | 0.66652 | 0.59982 |
| O172 | 0.60519 | 0.66042 | 0.79431 |
| O173 | 0.73101 | 0.64814 | 0.73304 |
| O174 | 0.82863 | 0.55628 | 0.71056 |
| O175 | 0.58514 | 0.54858 | 0.69098 |
| O176 | 0.93236 | 0.37397 | 0.92739 |
| O177 | 0.90691 | 0.50396 | 0.91042 |
| O178 | 0.88772 | 0.63431 | 0.92737 |
| O179 | 0.69179 | 0.36525 | 0.88896 |
| O180 | 0.6742  | 0.49314 | 0.94903 |
| O181 | 0.69795 | 0.62654 | 0.92508 |
| O182 | 0.48788 | 0.45835 | 0.7087  |
| O183 | 0.48471 | 0.63457 | 0.72225 |

|      |         |          |         |
|------|---------|----------|---------|
| O184 | 0.64483 | 0.93188  | 0.28835 |
| O185 | 0.7     | 0.92605  | 0.10991 |
| O186 | 0.80255 | 0.94817  | 0.98496 |
| O187 | 0.90226 | 0.92811  | 0.11428 |
| O188 | 0.89797 | 0.94724  | 0.31179 |
| O189 | 0.77206 | 0.96441  | 0.26409 |
| O190 | 0.64606 | 0.16582  | 0.26653 |
| O191 | 0.70209 | 0.15626  | 0.0913  |
| O192 | 0.81317 | 0.14409  | 0.98724 |
| O193 | 0.92095 | 0.16746  | 0.09723 |
| O194 | 0.9     | 0.15782  | 0.2925  |
| O195 | 0.7732  | 0.12621  | 0.25573 |
| O196 | 0.67727 | 0.04524  | 0.19493 |
| O197 | 0.92215 | 0.04845  | 0.18544 |
| O198 | 0.57066 | 0.87507  | 0.42888 |
| O199 | 0.59138 | 0.00556  | 0.43611 |
| O200 | 0.59417 | 0.13833  | 0.44529 |
| O201 | 0.80742 | 0.8679   | 0.39299 |
| O202 | 0.81364 | 0.99557  | 0.44731 |
| O203 | 0.82092 | 0.13026  | 0.44361 |
| O204 | 0.01297 | 0.95291  | 0.22146 |
| O205 | 0.02055 | 0.13559  | 0.21757 |
| O206 | 0.85917 | 0.05285  | 0.7881  |
| O207 | 0.80358 | 0.06881  | 0.61166 |
| O208 | 0.70444 | 0.06815  | 0.47667 |
| O209 | 0.60549 | 0.06871  | 0.61058 |
| O210 | 0.60498 | 0.05223  | 0.8081  |
| O211 | 0.7305  | 0.02843  | 0.76574 |
| O212 | 0.85964 | 0.83212  | 0.76513 |
| O213 | 0.80909 | 0.83147  | 0.5847  |
| O214 | 0.69376 | 0.8499   | 0.49188 |
| O215 | 0.58987 | 0.82603  | 0.61123 |
| O216 | 0.60658 | 0.84445  | 0.80561 |
| O217 | 0.73005 | 0.85411  | 0.7409  |
| O218 | 0.81871 | 0.94607  | 0.68404 |
| O219 | 0.58325 | 0.94893  | 0.68482 |
| O220 | 0.93342 | 0.12745  | 0.90834 |
| O221 | 0.92163 | 0.9974   | 0.94534 |
| O222 | 0.90427 | 0.86516  | 0.94459 |
| O223 | 0.69701 | 0.12489  | 0.89684 |
| O224 | 0.68273 | -0.00319 | 0.94567 |
| O225 | 0.70448 | 0.86461  | 0.93715 |
| O226 | 0.49232 | 0.04592  | 0.71355 |
| O227 | 0.48672 | 0.86181  | 0.72565 |

|      |         |         |         |
|------|---------|---------|---------|
| O228 | 0.35789 | 0.43986 | 0.70916 |
| O229 | 0.30763 | 0.42583 | 0.89023 |
| O230 | 0.20611 | 0.44448 | 0.01893 |
| O231 | 0.10852 | 0.42871 | 0.88569 |
| O232 | 0.10607 | 0.45021 | 0.68829 |
| O233 | 0.23042 | 0.46524 | 0.7419  |
| O234 | 0.35525 | 0.66224 | 0.72137 |
| O235 | 0.30376 | 0.66748 | 0.90045 |
| O236 | 0.19385 | 0.64608 | 0.00778 |
| O237 | 0.08692 | 0.66986 | 0.89624 |
| O238 | 0.10161 | 0.65527 | 0.70054 |
| O239 | 0.22741 | 0.63208 | 0.74711 |
| O240 | 0.32128 | 0.54869 | 0.81328 |
| O241 | 0.07781 | 0.54865 | 0.81687 |
| O242 | 0.43431 | 0.37436 | 0.57963 |
| O243 | 0.41588 | 0.50422 | 0.55626 |
| O244 | 0.41615 | 0.63728 | 0.54986 |
| O245 | 0.19734 | 0.37234 | 0.60582 |
| O246 | 0.19367 | 0.50109 | 0.55829 |
| O247 | 0.19081 | 0.6352  | 0.55555 |
| O248 | 0.9943  | 0.44545 | 0.78775 |
| O249 | 0.98224 | 0.63747 | 0.78391 |
| O250 | 0.1418  | 0.5535  | 0.21597 |
| O251 | 0.20409 | 0.56772 | 0.38802 |
| O252 | 0.30363 | 0.56944 | 0.52112 |
| O253 | 0.40056 | 0.56943 | 0.38431 |
| O254 | 0.40084 | 0.55674 | 0.18706 |
| O255 | 0.27313 | 0.53918 | 0.22638 |
| O256 | 0.14642 | 0.33195 | 0.23509 |
| O257 | 0.19809 | 0.33586 | 0.4142  |
| O258 | 0.31228 | 0.35294 | 0.51064 |
| O259 | 0.4168  | 0.33081 | 0.39295 |
| O260 | 0.40215 | 0.33927 | 0.19643 |
| O261 | 0.27744 | 0.34861 | 0.25682 |
| O262 | 0.1949  | 0.44688 | 0.30466 |
| O263 | 0.41816 | 0.45003 | 0.30521 |
| O264 | 0.07306 | 0.62344 | 0.08193 |
| O265 | 0.08604 | 0.49263 | 0.057   |
| O266 | 0.10411 | 0.36081 | 0.05252 |
| O267 | 0.31287 | 0.62756 | 0.08928 |
| O268 | 0.32451 | 0.49609 | 0.05464 |
| O269 | 0.3066  | 0.36263 | 0.0622  |
| O270 | 0.51283 | 0.54423 | 0.28113 |
| O271 | 0.51963 | 0.3653  | 0.27864 |



|            |          |         |         |
|------------|----------|---------|---------|
| O272       | 0.44158  | 0.74918 | 0.64376 |
| O273       | 0.19529  | 0.74753 | 0.65741 |
| O274       | 0.27431  | 0.74973 | 0.04839 |
| O275       | 0.11166  | 0.74753 | 0.0526  |
| O276       | 0.06794  | 0.24771 | 0.13488 |
| O277       | 0.31389  | 0.24454 | 0.14571 |
| O278       | 0.23204  | 0.25048 | 0.55794 |
| O279       | 0.3953   | 0.25061 | 0.54701 |
| O280       | 0.56264  | 0.25043 | 0.35607 |
| O281       | 0.80282  | 0.24325 | 0.34251 |
| O282       | 0.72969  | 0.24575 | 0.9492  |
| O283       | 0.89141  | 0.24962 | 0.94893 |
| O284       | 0.93827  | 0.74978 | 0.86785 |
| O285       | 0.69579  | 0.74851 | 0.85293 |
| O286       | 0.77247  | 0.74605 | 0.44264 |
| O287       | 0.60915  | 0.74986 | 0.45211 |
| O288       | 0.95     | 0.26119 | 0.4627  |
| O289       | 0.91089  | 0.18831 | 0.60175 |
| O290       | 0.85275  | 0.30458 | 0.5734  |
| O291       | 0.9615   | 0.30165 | 0.64907 |
| GA29       | 0.90171  | 0.38453 | 0.63477 |
| H293       | 0.93846  | 0.29537 | 0.4101  |
| H294       | 0.81511  | 0.33219 | 0.49632 |
| H295       | 0.88532  | 0.16153 | 0.55248 |
| H296       | 0.93868  | 0.43512 | 0.56907 |
| H297       | 0.01034  | 0.48676 | 0.55329 |
| H298       | 0.96341  | 0.48608 | 0.44158 |
| H299       | 0.04025  | 0.3861  | 0.4563  |
| H300       | 0.10978  | 0.4408  | 0.45816 |
| H301       | 0.05948  | 0.43554 | 0.34992 |
| H302       | 0.04912  | 0.57169 | 0.37142 |
| H303       | 0.08336  | 0.57524 | 0.49382 |
| H304       | -0.00016 | 0.6003  | 0.47302 |
| AL30       | 0.81829  | 0.32654 | 0.31876 |
| AL30       | 0.80099  | 0.475   | 0.7156  |
| P307       | 0.92034  | 0.26352 | 0.57122 |
| C308       | 0.01429  | 0.4924  | 0.47167 |
| C309       | 0.05817  | 0.43583 | 0.43194 |
| C310       | 0.0382   | 0.5637  | 0.45077 |
| <b>TS1</b> |          |         |         |
| SI2        | 0.42433  | 0.05806 | 0.64757 |
| SI3        | 0.3061   | 0.02746 | 0.79362 |
| SI4        | 0.28061  | 0.05857 | 0.01421 |

|      |         |         |         |
|------|---------|---------|---------|
| SI5  | 0.12145 | 0.0627  | 0.01448 |
| SI6  | 0.06802 | 0.02893 | 0.80253 |
| SI7  | 0.1803  | 0.05721 | 0.66101 |
| SI8  | 0.42112 | 0.8264  | 0.67353 |
| SI9  | 0.3054  | 0.86902 | 0.8135  |
| SI10 | 0.26673 | 0.82919 | 0.0323  |
| SI11 | 0.11238 | 0.82697 | 0.01807 |
| SI12 | 0.06608 | 0.87157 | 0.80335 |
| SI13 | 0.18368 | 0.82801 | 0.67597 |
| SI14 | 0.07621 | 0.94216 | 0.15374 |
| SI15 | 0.19548 | 0.97242 | 0.29671 |
| SI16 | 0.2188  | 0.93863 | 0.51876 |
| SI17 | 0.37837 | 0.93442 | 0.51713 |
| SI18 | 0.43143 | 0.96867 | 0.30671 |
| SI19 | 0.3204  | 0.94324 | 0.16146 |
| SI20 | 0.08219 | 0.17216 | 0.16841 |
| SI21 | 0.19521 | 0.13039 | 0.31355 |
| SI22 | 0.23314 | 0.17214 | 0.52994 |
| SI23 | 0.38739 | 0.17414 | 0.5118  |
| SI24 | 0.43485 | 0.12651 | 0.30064 |
| SI25 | 0.31576 | 0.16749 | 0.17446 |
| SI26 | 0.57485 | 0.5574  | 0.35276 |
| SI27 | 0.68679 | 0.53049 | 0.19609 |
| SI28 | 0.71327 | 0.56257 | 0.98528 |
| SI29 | 0.87174 | 0.56769 | 0.98037 |
| SI30 | 0.93235 | 0.53007 | 0.18858 |
| SI31 | 0.81403 | 0.55322 | 0.32205 |
| SI32 | 0.5772  | 0.32832 | 0.33088 |
| SI33 | 0.69338 | 0.37481 | 0.18975 |
| SI34 | 0.72782 | 0.32468 | 0.97558 |
| SI35 | 0.88236 | 0.32665 | 0.98696 |
| SI36 | 0.93522 | 0.37146 | 0.1959  |
| SI37 | 0.92437 | 0.44245 | 0.85068 |
| SI38 | 0.77817 | 0.43778 | 0.47505 |
| SI39 | 0.61839 | 0.43414 | 0.48656 |
| SI40 | 0.57044 | 0.47062 | 0.70003 |
| SI41 | 0.67985 | 0.43911 | 0.84595 |
| SI42 | 0.91774 | 0.6759  | 0.82584 |
| SI43 | 0.80533 | 0.63435 | 0.68764 |
| SI44 | 0.76443 | 0.66658 | 0.46864 |
| SI45 | 0.60964 | 0.6737  | 0.48521 |
| SI46 | 0.56195 | 0.62818 | 0.69738 |
| SI47 | 0.68131 | 0.6726  | 0.81981 |
| SI48 | 0.57767 | 0.94248 | 0.36055 |

|      |         |         |         |
|------|---------|---------|---------|
| SI49 | 0.69331 | 0.96625 | 0.21294 |
| SI50 | 0.72168 | 0.93469 | 0.99272 |
| SI51 | 0.88121 | 0.93407 | 0.99544 |
| SI52 | 0.93197 | 0.96887 | 0.20415 |
| SI53 | 0.81878 | 0.9448  | 0.35209 |
| SI54 | 0.57747 | 0.17262 | 0.33216 |
| SI55 | 0.69479 | 0.12133 | 0.19783 |
| SI56 | 0.73424 | 0.16671 | 0.97923 |
| SI57 | 0.88914 | 0.17319 | 0.98126 |
| SI58 | 0.93856 | 0.12562 | 0.19125 |
| SI59 | 0.81833 | 0.16425 | 0.32409 |
| SI60 | 0.92362 | 0.05287 | 0.85505 |
| SI61 | 0.80231 | 0.02329 | 0.708   |
| SI62 | 0.78294 | 0.06677 | 0.49151 |
| SI63 | 0.62206 | 0.07077 | 0.49068 |
| SI64 | 0.56942 | 0.03015 | 0.7013  |
| SI65 | 0.67996 | 0.05082 | 0.84976 |
| SI66 | 0.92205 | 0.82875 | 0.83528 |
| SI67 | 0.80294 | 0.86631 | 0.68969 |
| SI68 | 0.76863 | 0.82337 | 0.47426 |
| SI69 | 0.6144  | 0.82633 | 0.49409 |
| SI70 | 0.56602 | 0.87227 | 0.70396 |
| SI71 | 0.68295 | 0.82965 | 0.83159 |
| SI72 | 0.42392 | 0.4443  | 0.64595 |
| SI73 | 0.30454 | 0.47284 | 0.79177 |
| SI74 | 0.2835  | 0.43465 | 0.01312 |
| SI75 | 0.12659 | 0.43448 | 0.0137  |
| SI76 | 0.07644 | 0.47447 | 0.80598 |
| SI77 | 0.18063 | 0.44771 | 0.65038 |
| SI78 | 0.42062 | 0.67226 | 0.66379 |
| SI79 | 0.30142 | 0.6296  | 0.80286 |
| SI80 | 0.26598 | 0.67228 | 0.01952 |
| SI81 | 0.1117  | 0.67434 | 0.01124 |
| SI82 | 0.06326 | 0.63161 | 0.80064 |
| SI83 | 0.17973 | 0.66999 | 0.66785 |
| SI84 | 0.07629 | 0.5557  | 0.14372 |
| SI85 | 0.19752 | 0.52757 | 0.28587 |
| SI86 | 0.21825 | 0.56565 | 0.50754 |
| SI87 | 0.37877 | 0.56739 | 0.50894 |
| SI88 | 0.43053 | 0.52983 | 0.29571 |
| SI89 | 0.32283 | 0.55401 | 0.14719 |
| SI90 | 0.0811  | 0.32601 | 0.16115 |
| SI91 | 0.19661 | 0.36947 | 0.30586 |
| SI92 | 0.23268 | 0.32953 | 0.52503 |

|      |         |         |         |
|------|---------|---------|---------|
| SI93 | 0.38705 | 0.32818 | 0.5109  |
| SI94 | 0.43432 | 0.37167 | 0.2955  |
| SI95 | 0.31756 | 0.32604 | 0.16887 |
| O96  | 0.3592  | 0.06329 | 0.71932 |
| O97  | 0.30972 | 0.06466 | 0.90144 |
| O98  | 0.20054 | 0.04499 | 0.0128  |
| O99  | 0.09232 | 0.0687  | 0.90207 |
| O100 | 0.1049  | 0.05976 | 0.70495 |
| O101 | 0.23073 | 0.03473 | 0.75018 |
| O102 | 0.36171 | 0.82541 | 0.75588 |
| O103 | 0.30605 | 0.8468  | 0.9297  |
| O104 | 0.18933 | 0.85341 | 0.02176 |
| O105 | 0.08533 | 0.83112 | 0.90438 |
| O106 | 0.10626 | 0.83911 | 0.70931 |
| O107 | 0.23185 | 0.85451 | 0.766   |
| O108 | 0.32425 | 0.94813 | 0.80339 |
| O109 | 0.08687 | 0.94993 | 0.81573 |
| O110 | 0.43247 | 0.12756 | 0.5849  |
| O111 | 0.41855 | 0.99605 | 0.56894 |
| O112 | 0.39635 | 0.86446 | 0.57283 |
| O113 | 0.19942 | 0.13169 | 0.62173 |
| O114 | 0.18273 | 0.00307 | 0.57012 |
| O115 | 0.19839 | 0.86883 | 0.57342 |
| O116 | 0.98828 | 0.03815 | 0.78543 |
| O117 | 0.98628 | 0.86504 | 0.78327 |
| O118 | 0.14203 | 0.93605 | 0.22372 |
| O119 | 0.19425 | 0.93407 | 0.40357 |
| O120 | 0.299   | 0.94961 | 0.52564 |
| O121 | 0.40074 | 0.92766 | 0.40128 |
| O122 | 0.39606 | 0.94271 | 0.20466 |
| O123 | 0.27015 | 0.96741 | 0.25    |
| O124 | 0.14115 | 0.17381 | 0.25116 |
| O125 | 0.19255 | 0.15673 | 0.42771 |
| O126 | 0.31029 | 0.14804 | 0.51595 |
| O127 | 0.41421 | 0.17085 | 0.39771 |
| O128 | 0.39342 | 0.15302 | 0.20351 |
| O129 | 0.26965 | 0.14198 | 0.26757 |
| O130 | 0.17551 | 0.05123 | 0.3086  |
| O131 | 0.41712 | 0.04836 | 0.32312 |
| O132 | 0.06684 | 0.87275 | 0.09138 |
| O133 | 0.08226 | 0.00407 | 0.07498 |
| O134 | 0.10865 | 0.13445 | 0.06842 |
| O135 | 0.30165 | 0.86786 | 0.12506 |
| O136 | 0.31666 | 0.99501 | 0.06781 |

|      |         |         |         |
|------|---------|---------|---------|
| O137 | 0.29638 | 0.12818 | 0.07241 |
| O138 | 0.5108  | 0.955   | 0.29507 |
| O139 | 0.51423 | 0.13541 | 0.27864 |
| O140 | 0.64056 | 0.56265 | 0.28307 |
| O141 | 0.67613 | 0.57204 | 0.09275 |
| O142 | 0.7934  | 0.55994 | 0.0041  |
| O143 | 0.91413 | 0.56625 | 0.08346 |
| O144 | 0.88986 | 0.56154 | 0.2805  |
| O145 | 0.76465 | 0.53805 | 0.229   |
| O146 | 0.64175 | 0.33281 | 0.25958 |
| O147 | 0.69186 | 0.33824 | 0.08158 |
| O148 | 0.8053  | 0.35161 | 0.97808 |
| O149 | 0.90707 | 0.32789 | 0.10219 |
| O150 | 0.9006  | 0.34162 | 0.2968  |
| O151 | 0.76706 | 0.37351 | 0.23733 |
| O152 | 0.66711 | 0.4521  | 0.18007 |
| O153 | 0.9171  | 0.45006 | 0.17911 |
| O154 | 0.56498 | 0.62884 | 0.40922 |
| O155 | 0.58107 | 0.49818 | 0.4362  |
| O156 | 0.59208 | 0.36447 | 0.43777 |
| O157 | 0.79379 | 0.62247 | 0.37709 |
| O158 | 0.8132  | 0.48917 | 0.39787 |
| O159 | 0.80131 | 0.3585  | 0.44187 |
| O160 | 0.01087 | 0.54372 | 0.21342 |
| O161 | 0.01571 | 0.36368 | 0.20616 |
| O162 | 0.87849 | 0.42717 | 0.74957 |
| O163 | 0.80922 | 0.44415 | 0.58308 |
| O164 | 0.69811 | 0.44249 | 0.46554 |
| O165 | 0.60252 | 0.43111 | 0.60482 |
| O166 | 0.60392 | 0.44502 | 0.80279 |
| O167 | 0.73355 | 0.45313 | 0.76074 |
| O168 | 0.86098 | 0.68299 | 0.74016 |
| O169 | 0.80724 | 0.64979 | 0.56809 |
| O170 | 0.68637 | 0.64637 | 0.48641 |
| O171 | 0.57813 | 0.66939 | 0.59602 |
| O172 | 0.60345 | 0.66169 | 0.78874 |
| O173 | 0.73015 | 0.65386 | 0.7268  |
| O174 | 0.82459 | 0.5583  | 0.71283 |
| O175 | 0.58368 | 0.55042 | 0.68302 |
| O176 | 0.92944 | 0.377   | 0.92192 |
| O177 | 0.89361 | 0.50489 | 0.91001 |
| O178 | 0.88835 | 0.63755 | 0.92376 |
| O179 | 0.68735 | 0.36277 | 0.88829 |
| O180 | 0.68787 | 0.49226 | 0.93812 |

|      |         |         |         |
|------|---------|---------|---------|
| O181 | 0.69692 | 0.62691 | 0.91651 |
| O182 | 0.49094 | 0.45632 | 0.7105  |
| O183 | 0.48216 | 0.63418 | 0.72016 |
| O184 | 0.63963 | 0.92913 | 0.28495 |
| O185 | 0.69695 | 0.92662 | 0.1073  |
| O186 | 0.80163 | 0.94824 | 0.98595 |
| O187 | 0.90237 | 0.92485 | 0.11168 |
| O188 | 0.89399 | 0.95038 | 0.30754 |
| O189 | 0.76678 | 0.96409 | 0.26373 |
| O190 | 0.64166 | 0.16691 | 0.25897 |
| O191 | 0.69867 | 0.15074 | 0.08525 |
| O192 | 0.81271 | 0.14561 | 0.98701 |
| O193 | 0.92272 | 0.16859 | 0.09098 |
| O194 | 0.89386 | 0.1528  | 0.28285 |
| O195 | 0.76747 | 0.12201 | 0.25204 |
| O196 | 0.66963 | 0.04357 | 0.19521 |
| O197 | 0.92159 | 0.04701 | 0.17304 |
| O198 | 0.56699 | 0.8764  | 0.42991 |
| O199 | 0.59091 | 0.00623 | 0.43344 |
| O200 | 0.59318 | 0.13893 | 0.4404  |
| O201 | 0.80675 | 0.86851 | 0.39099 |
| O202 | 0.81106 | 0.99688 | 0.44502 |
| O203 | 0.81677 | 0.1321  | 0.43786 |
| O204 | 0.01063 | 0.95293 | 0.22305 |
| O205 | 0.01753 | 0.1349  | 0.21702 |
| O206 | 0.85738 | 0.05057 | 0.78614 |
| O207 | 0.80482 | 0.07075 | 0.60868 |
| O208 | 0.70262 | 0.06909 | 0.47918 |
| O209 | 0.60115 | 0.07127 | 0.60757 |
| O210 | 0.60466 | 0.05278 | 0.80521 |
| O211 | 0.7291  | 0.02709 | 0.75943 |
| O212 | 0.85974 | 0.83316 | 0.75922 |
| O213 | 0.80605 | 0.82989 | 0.58157 |
| O214 | 0.69204 | 0.85061 | 0.48578 |
| O215 | 0.59087 | 0.8267  | 0.61016 |
| O216 | 0.60572 | 0.84809 | 0.80388 |
| O217 | 0.72964 | 0.85558 | 0.7395  |
| O218 | 0.81753 | 0.94618 | 0.67621 |
| O219 | 0.58163 | 0.95066 | 0.67985 |
| O220 | 0.93102 | 0.1277  | 0.90251 |
| O221 | 0.92025 | 0.99741 | 0.94467 |
| O222 | 0.90236 | 0.86495 | 0.93982 |
| O223 | 0.69942 | 0.12515 | 0.88914 |
| O224 | 0.68324 | 0.99815 | 0.94235 |



|      |         |         |         |
|------|---------|---------|---------|
| O225 | 0.70378 | 0.86559 | 0.93542 |
| O226 | 0.49059 | 0.0469  | 0.71504 |
| O227 | 0.48623 | 0.86292 | 0.72192 |
| O228 | 0.36081 | 0.43873 | 0.72152 |
| O229 | 0.29932 | 0.43008 | 0.89465 |
| O230 | 0.20481 | 0.44993 | 0.03515 |
| O231 | 0.11335 | 0.43319 | 0.89433 |
| O232 | 0.10599 | 0.44933 | 0.69908 |
| O233 | 0.23269 | 0.47077 | 0.73608 |
| O234 | 0.35497 | 0.66847 | 0.73398 |
| O235 | 0.30186 | 0.66529 | 0.91146 |
| O236 | 0.18862 | 0.64756 | 0.01042 |
| O237 | 0.08335 | 0.67599 | 0.89777 |
| O238 | 0.1022  | 0.6598  | 0.70235 |
| O239 | 0.22751 | 0.63563 | 0.75254 |
| O240 | 0.32242 | 0.55102 | 0.81468 |
| O241 | 0.08669 | 0.5545  | 0.82153 |
| O242 | 0.43213 | 0.37458 | 0.58401 |
| O243 | 0.41421 | 0.50515 | 0.56636 |
| O244 | 0.40431 | 0.63783 | 0.55639 |
| O245 | 0.1953  | 0.37207 | 0.61201 |
| O246 | 0.183   | 0.49946 | 0.55642 |
| O247 | 0.19093 | 0.63374 | 0.56035 |
| O248 | 0.99724 | 0.45857 | 0.80489 |
| O249 | 0.9831  | 0.63585 | 0.78234 |
| O250 | 0.14172 | 0.5615  | 0.2142  |
| O251 | 0.19814 | 0.56878 | 0.39044 |
| O252 | 0.29847 | 0.5597  | 0.52213 |
| O253 | 0.39956 | 0.56799 | 0.39239 |
| O254 | 0.39662 | 0.56028 | 0.19558 |
| O255 | 0.27047 | 0.53216 | 0.23422 |
| O256 | 0.13976 | 0.32956 | 0.24408 |
| O257 | 0.19498 | 0.34122 | 0.41918 |
| O258 | 0.30987 | 0.3547  | 0.5152  |
| O259 | 0.41381 | 0.33196 | 0.39695 |
| O260 | 0.39478 | 0.33854 | 0.20144 |
| O261 | 0.26969 | 0.35668 | 0.25649 |
| O262 | 0.17902 | 0.44919 | 0.3058  |
| O263 | 0.4141  | 0.45021 | 0.30676 |
| O264 | 0.06712 | 0.62483 | 0.08072 |
| O265 | 0.082   | 0.49314 | 0.06541 |
| O266 | 0.10526 | 0.36169 | 0.05793 |
| O267 | 0.30349 | 0.62653 | 0.10162 |
| O268 | 0.32559 | 0.49659 | 0.06072 |

|                                        |         |         |         |
|----------------------------------------|---------|---------|---------|
| O269                                   | 0.30327 | 0.363   | 0.06276 |
| O270                                   | 0.50999 | 0.54264 | 0.28408 |
| O271                                   | 0.51398 | 0.36435 | 0.27582 |
| O272                                   | 0.43973 | 0.74999 | 0.643   |
| O273                                   | 0.1972  | 0.74895 | 0.65485 |
| O274                                   | 0.27039 | 0.74955 | 0.05623 |
| O275                                   | 0.10775 | 0.74974 | 0.05656 |
| O276                                   | 0.06324 | 0.24852 | 0.13684 |
| O277                                   | 0.30333 | 0.2467  | 0.15408 |
| O278                                   | 0.22948 | 0.25131 | 0.55674 |
| O279                                   | 0.39212 | 0.25128 | 0.5501  |
| O280                                   | 0.5594  | 0.25049 | 0.35308 |
| O281                                   | 0.79735 | 0.24156 | 0.32591 |
| O282                                   | 0.72709 | 0.24513 | 0.95101 |
| O283                                   | 0.8909  | 0.25087 | 0.94361 |
| O284                                   | 0.93981 | 0.75101 | 0.85987 |
| O285                                   | 0.69275 | 0.75027 | 0.8507  |
| O286                                   | 0.77045 | 0.74553 | 0.43836 |
| O287                                   | 0.60678 | 0.75126 | 0.4485  |
| O288                                   | 0.93835 | 0.24884 | 0.413   |
| O289                                   | 0.94495 | 0.19022 | 0.57627 |
| O290                                   | 0.88781 | 0.30677 | 0.56777 |
| O291                                   | 0.01237 | 0.29689 | 0.55301 |
| GA29                                   | 0.93659 | 0.37055 | 0.65972 |
| H293                                   | 0.93053 | 0.28866 | 0.36494 |
| H294                                   | 0.83075 | 0.33645 | 0.49522 |
| H295                                   | 0.90851 | 0.16165 | 0.55158 |
| H296                                   | 0.9705  | 0.32783 | 0.74289 |
| H297                                   | 0.99995 | 0.36166 | 0.55371 |
| H298                                   | 0.92708 | 0.42052 | 0.48886 |
| H299                                   | 0.02991 | 0.37485 | 0.40778 |
| H300                                   | 0.08042 | 0.42683 | 0.48452 |
| H301                                   | 0.02471 | 0.46377 | 0.39704 |
| H302                                   | 0.96762 | 0.53476 | 0.50674 |
| H303                                   | 0.02539 | 0.51222 | 0.60121 |
| H304                                   | 0.9382  | 0.51209 | 0.62642 |
| AL30                                   | 0.81439 | 0.32533 | 0.3154  |
| AL30                                   | 0.80649 | 0.47419 | 0.70374 |
| P307                                   | 0.94665 | 0.26187 | 0.52646 |
| C308                                   | 0.97427 | 0.42798 | 0.5296  |
| C309                                   | 0.03096 | 0.42196 | 0.45011 |
| C310                                   | 0.97618 | 0.50038 | 0.57    |
| <b>C<sub>3</sub>H<sub>7</sub>Ga(H)</b> |         |         |         |

|      |         |         |         |
|------|---------|---------|---------|
| SI2  | 0.42318 | 0.05962 | 0.64936 |
| SI3  | 0.30634 | 0.03023 | 0.79652 |
| SI4  | 0.28054 | 0.0577  | 0.01844 |
| SI5  | 0.12139 | 0.06338 | 0.01481 |
| SI6  | 0.06722 | 0.02898 | 0.80252 |
| SI7  | 0.18131 | 0.06113 | 0.66667 |
| SI8  | 0.42081 | 0.82732 | 0.67535 |
| SI9  | 0.30346 | 0.87099 | 0.81087 |
| SI10 | 0.26678 | 0.8307  | 0.0298  |
| SI11 | 0.11237 | 0.82768 | 0.01844 |
| SI12 | 0.06548 | 0.87127 | 0.8035  |
| SI13 | 0.18202 | 0.82735 | 0.67502 |
| SI14 | 0.07649 | 0.94211 | 0.15473 |
| SI15 | 0.19443 | 0.97099 | 0.29802 |
| SI16 | 0.21835 | 0.93993 | 0.52111 |
| SI17 | 0.37873 | 0.93418 | 0.5173  |
| SI18 | 0.43332 | 0.96841 | 0.30604 |
| SI19 | 0.31965 | 0.93978 | 0.16743 |
| SI20 | 0.08225 | 0.1734  | 0.16742 |
| SI21 | 0.19561 | 0.12994 | 0.30993 |
| SI22 | 0.23194 | 0.17117 | 0.52646 |
| SI23 | 0.3866  | 0.17417 | 0.51031 |
| SI24 | 0.43512 | 0.12665 | 0.29877 |
| SI25 | 0.31627 | 0.16935 | 0.17378 |
| SI26 | 0.57764 | 0.55894 | 0.34859 |
| SI27 | 0.68888 | 0.53332 | 0.19302 |
| SI28 | 0.71296 | 0.56056 | 0.97927 |
| SI29 | 0.87145 | 0.56556 | 0.98234 |
| SI30 | 0.9315  | 0.53058 | 0.19264 |
| SI31 | 0.81274 | 0.55672 | 0.32037 |
| SI32 | 0.57712 | 0.32872 | 0.32692 |
| SI33 | 0.69491 | 0.37553 | 0.18899 |
| SI34 | 0.73026 | 0.32705 | 0.97348 |
| SI35 | 0.88507 | 0.32736 | 0.98351 |
| SI36 | 0.93711 | 0.37179 | 0.19619 |
| SI37 | 0.9247  | 0.44271 | 0.84743 |
| SI38 | 0.77773 | 0.4401  | 0.4755  |
| SI39 | 0.61695 | 0.43385 | 0.48564 |
| SI40 | 0.5659  | 0.46974 | 0.70004 |
| SI41 | 0.6786  | 0.43728 | 0.83831 |
| SI42 | 0.91783 | 0.67516 | 0.8292  |
| SI43 | 0.80444 | 0.63702 | 0.6901  |
| SI44 | 0.7639  | 0.66703 | 0.47129 |
| SI45 | 0.60928 | 0.67311 | 0.48667 |

|      |         |         |         |
|------|---------|---------|---------|
| SI46 | 0.56119 | 0.62774 | 0.69962 |
| SI47 | 0.68106 | 0.67524 | 0.82067 |
| SI48 | 0.57783 | 0.94267 | 0.36075 |
| SI49 | 0.69388 | 0.96715 | 0.21339 |
| SI50 | 0.72106 | 0.93794 | 0.99375 |
| SI51 | 0.88022 | 0.93506 | 0.99602 |
| SI52 | 0.93223 | 0.96905 | 0.20518 |
| SI53 | 0.81855 | 0.94347 | 0.35042 |
| SI54 | 0.57741 | 0.17315 | 0.33088 |
| SI55 | 0.69519 | 0.12251 | 0.19745 |
| SI56 | 0.73447 | 0.16787 | 0.97884 |
| SI57 | 0.88892 | 0.17292 | 0.98254 |
| SI58 | 0.93841 | 0.12634 | 0.19364 |
| SI59 | 0.81901 | 0.16442 | 0.32596 |
| SI60 | 0.92349 | 0.05337 | 0.85502 |
| SI61 | 0.80162 | 0.02314 | 0.71088 |
| SI62 | 0.7811  | 0.0635  | 0.49189 |
| SI63 | 0.62075 | 0.07089 | 0.49013 |
| SI64 | 0.56907 | 0.03173 | 0.70125 |
| SI65 | 0.67906 | 0.05309 | 0.85113 |
| SI66 | 0.92073 | 0.82779 | 0.83744 |
| SI67 | 0.80319 | 0.86538 | 0.69068 |
| SI68 | 0.76745 | 0.82427 | 0.47477 |
| SI69 | 0.61339 | 0.82659 | 0.49519 |
| SI70 | 0.5651  | 0.87402 | 0.70454 |
| SI71 | 0.68233 | 0.83095 | 0.83244 |
| SI72 | 0.41999 | 0.44268 | 0.6486  |
| SI73 | 0.30602 | 0.46947 | 0.79708 |
| SI74 | 0.28299 | 0.44026 | 0.0204  |
| SI75 | 0.12584 | 0.43657 | 0.01455 |
| SI76 | 0.07533 | 0.47527 | 0.80667 |
| SI77 | 0.18335 | 0.44367 | 0.66107 |
| SI78 | 0.4199  | 0.67339 | 0.67001 |
| SI79 | 0.30168 | 0.62771 | 0.80408 |
| SI80 | 0.26549 | 0.67083 | 0.02273 |
| SI81 | 0.11131 | 0.67514 | 0.01372 |
| SI82 | 0.06404 | 0.63155 | 0.80365 |
| SI83 | 0.17928 | 0.6697  | 0.66933 |
| SI84 | 0.07509 | 0.55722 | 0.14526 |
| SI85 | 0.19374 | 0.52823 | 0.28881 |
| SI86 | 0.21797 | 0.5633  | 0.50997 |
| SI87 | 0.37895 | 0.56889 | 0.51051 |
| SI88 | 0.43452 | 0.5319  | 0.29872 |
| SI89 | 0.32098 | 0.5595  | 0.16073 |

|      |         |         |         |
|------|---------|---------|---------|
| SI90 | 0.08302 | 0.32654 | 0.1641  |
| SI91 | 0.19518 | 0.36951 | 0.3081  |
| SI92 | 0.23161 | 0.33114 | 0.52591 |
| SI93 | 0.38636 | 0.32868 | 0.50968 |
| SI94 | 0.43424 | 0.37362 | 0.29516 |
| SI95 | 0.31579 | 0.32728 | 0.173   |
| O96  | 0.35945 | 0.06732 | 0.72352 |
| O97  | 0.31499 | 0.05947 | 0.90876 |
| O98  | 0.2005  | 0.0465  | 0.00938 |
| O99  | 0.09013 | 0.06762 | 0.90363 |
| O100 | 0.10488 | 0.06135 | 0.70662 |
| O101 | 0.23035 | 0.04519 | 0.76057 |
| O102 | 0.36086 | 0.82682 | 0.75684 |
| O103 | 0.30505 | 0.85447 | 0.92908 |
| O104 | 0.18912 | 0.85452 | 0.02372 |
| O105 | 0.0866  | 0.83128 | 0.90411 |
| O106 | 0.10456 | 0.83841 | 0.70858 |
| O107 | 0.23011 | 0.85212 | 0.76631 |
| O108 | 0.32003 | 0.9498  | 0.79193 |
| O109 | 0.08624 | 0.94984 | 0.81364 |
| O110 | 0.43157 | 0.12799 | 0.58413 |
| O111 | 0.41472 | 0.99649 | 0.57368 |
| O112 | 0.39646 | 0.86436 | 0.57356 |
| O113 | 0.19844 | 0.13485 | 0.62226 |
| O114 | 0.189   | 0.00413 | 0.58104 |
| O115 | 0.19742 | 0.86969 | 0.57407 |
| O116 | 0.98762 | 0.03858 | 0.78427 |
| O117 | 0.98538 | 0.86439 | 0.78705 |
| O118 | 0.14181 | 0.93304 | 0.22525 |
| O119 | 0.18667 | 0.94068 | 0.40966 |
| O120 | 0.29887 | 0.94659 | 0.51667 |
| O121 | 0.40643 | 0.92879 | 0.4041  |
| O122 | 0.39614 | 0.93953 | 0.20723 |
| O123 | 0.27055 | 0.95848 | 0.26036 |
| O124 | 0.14124 | 0.17458 | 0.25023 |
| O125 | 0.19112 | 0.14943 | 0.42698 |
| O126 | 0.30951 | 0.14787 | 0.51444 |
| O127 | 0.41422 | 0.17002 | 0.3967  |
| O128 | 0.39392 | 0.15444 | 0.2023  |
| O129 | 0.27041 | 0.14619 | 0.26859 |
| O130 | 0.17805 | 0.05097 | 0.29466 |
| O131 | 0.41759 | 0.04816 | 0.31896 |
| O132 | 0.06586 | 0.87395 | 0.08976 |
| O133 | 0.08415 | 0.00514 | 0.07862 |

|      |         |         |         |
|------|---------|---------|---------|
| O134 | 0.10849 | 0.13566 | 0.06729 |
| O135 | 0.30244 | 0.86538 | 0.12538 |
| O136 | 0.31232 | 0.99515 | 0.07936 |
| O137 | 0.29566 | 0.12851 | 0.07369 |
| O138 | 0.51271 | 0.95547 | 0.29133 |
| O139 | 0.51454 | 0.13563 | 0.27702 |
| O140 | 0.64317 | 0.56748 | 0.27911 |
| O141 | 0.675   | 0.56934 | 0.08621 |
| O142 | 0.79266 | 0.55479 | 0.99953 |
| O143 | 0.91053 | 0.56656 | 0.08842 |
| O144 | 0.89037 | 0.562   | 0.28613 |
| O145 | 0.7669  | 0.5462  | 0.22176 |
| O146 | 0.64104 | 0.33269 | 0.25402 |
| O147 | 0.69297 | 0.34479 | 0.07704 |
| O148 | 0.80804 | 0.35311 | 0.97584 |
| O149 | 0.91126 | 0.33139 | 0.09786 |
| O150 | 0.90319 | 0.33784 | 0.29498 |
| O151 | 0.76835 | 0.36904 | 0.23615 |
| O152 | 0.67135 | 0.45385 | 0.18719 |
| O153 | 0.91681 | 0.45038 | 0.18503 |
| O154 | 0.56599 | 0.62908 | 0.40789 |
| O155 | 0.5852  | 0.49871 | 0.42987 |
| O156 | 0.59243 | 0.3647  | 0.43355 |
| O157 | 0.79332 | 0.62523 | 0.3776  |
| O158 | 0.80424 | 0.49117 | 0.39131 |
| O159 | 0.80461 | 0.36239 | 0.44166 |
| O160 | 0.01004 | 0.54525 | 0.21539 |
| O161 | 0.01784 | 0.36601 | 0.20619 |
| O162 | 0.87797 | 0.43093 | 0.74733 |
| O163 | 0.81353 | 0.45199 | 0.57931 |
| O164 | 0.69761 | 0.43879 | 0.47773 |
| O165 | 0.59276 | 0.43164 | 0.60046 |
| O166 | 0.6016  | 0.43966 | 0.79848 |
| O167 | 0.73015 | 0.45128 | 0.74994 |
| O168 | 0.86276 | 0.68308 | 0.74121 |
| O169 | 0.80778 | 0.64946 | 0.56962 |
| O170 | 0.68611 | 0.64586 | 0.48976 |
| O171 | 0.57632 | 0.66727 | 0.59637 |
| O172 | 0.60372 | 0.66231 | 0.78892 |
| O173 | 0.73039 | 0.66292 | 0.72583 |
| O174 | 0.8184  | 0.56083 | 0.72112 |
| O175 | 0.58201 | 0.54947 | 0.68795 |
| O176 | 0.93191 | 0.37407 | 0.91191 |
| O177 | 0.8976  | 0.50217 | 0.91694 |

|      |         |         |         |
|------|---------|---------|---------|
| O178 | 0.88736 | 0.63557 | 0.92528 |
| O179 | 0.69037 | 0.36208 | 0.88289 |
| O180 | 0.68583 | 0.49225 | 0.9283  |
| O181 | 0.69956 | 0.62671 | 0.91291 |
| O182 | 0.48615 | 0.45797 | 0.71387 |
| O183 | 0.48182 | 0.63482 | 0.72454 |
| O184 | 0.6419  | 0.93069 | 0.28866 |
| O185 | 0.69499 | 0.92762 | 0.10748 |
| O186 | 0.801   | 0.95228 | 0.99009 |
| O187 | 0.90321 | 0.92584 | 0.11152 |
| O188 | 0.89431 | 0.94893 | 0.30813 |
| O189 | 0.76849 | 0.96492 | 0.26055 |
| O190 | 0.64216 | 0.16796 | 0.25861 |
| O191 | 0.69876 | 0.15073 | 0.08445 |
| O192 | 0.81249 | 0.14502 | 0.98507 |
| O193 | 0.91985 | 0.16899 | 0.0942  |
| O194 | 0.89537 | 0.15401 | 0.28758 |
| O195 | 0.76835 | 0.12535 | 0.25083 |
| O196 | 0.67064 | 0.04471 | 0.19706 |
| O197 | 0.92099 | 0.04766 | 0.177   |
| O198 | 0.56666 | 0.87589 | 0.42842 |
| O199 | 0.5878  | 0.00617 | 0.43553 |
| O200 | 0.59289 | 0.13925 | 0.43915 |
| O201 | 0.80423 | 0.8673  | 0.38755 |
| O202 | 0.80988 | 0.99445 | 0.44472 |
| O203 | 0.81611 | 0.12924 | 0.43867 |
| O204 | 0.01091 | 0.95353 | 0.22391 |
| O205 | 0.01761 | 0.13607 | 0.21615 |
| O206 | 0.85687 | 0.05309 | 0.78659 |
| O207 | 0.80145 | 0.06784 | 0.6089  |
| O208 | 0.70126 | 0.06749 | 0.47565 |
| O209 | 0.60141 | 0.07274 | 0.60763 |
| O210 | 0.60408 | 0.05421 | 0.8054  |
| O211 | 0.72862 | 0.02725 | 0.76275 |
| O212 | 0.86004 | 0.83048 | 0.75818 |
| O213 | 0.80706 | 0.83314 | 0.57979 |
| O214 | 0.69098 | 0.85139 | 0.48823 |
| O215 | 0.58872 | 0.82797 | 0.61066 |
| O216 | 0.60557 | 0.85059 | 0.80404 |
| O217 | 0.7296  | 0.85187 | 0.73815 |
| O218 | 0.81776 | 0.94558 | 0.68363 |
| O219 | 0.58095 | 0.95224 | 0.67946 |
| O220 | 0.93215 | 0.12719 | 0.90569 |
| O221 | 0.92035 | 0.99679 | 0.94312 |

|      |         |         |         |
|------|---------|---------|---------|
| O222 | 0.89797 | 0.86518 | 0.9398  |
| O223 | 0.69824 | 0.12817 | 0.88798 |
| O224 | 0.68233 | 0.00217 | 0.94595 |
| O225 | 0.70489 | 0.87004 | 0.93271 |
| O226 | 0.49035 | 0.04866 | 0.71479 |
| O227 | 0.48544 | 0.86479 | 0.72387 |
| O228 | 0.35748 | 0.43065 | 0.72389 |
| O229 | 0.31053 | 0.4359  | 0.90691 |
| O230 | 0.2037  | 0.45791 | 0.02423 |
| O231 | 0.10579 | 0.43114 | 0.89745 |
| O232 | 0.10658 | 0.4498  | 0.70078 |
| O233 | 0.23017 | 0.46042 | 0.75656 |
| O234 | 0.35547 | 0.67208 | 0.74317 |
| O235 | 0.30249 | 0.65252 | 0.91884 |
| O236 | 0.18778 | 0.64743 | 0.0159  |
| O237 | 0.0849  | 0.67699 | 0.89928 |
| O238 | 0.10192 | 0.65965 | 0.70443 |
| O239 | 0.22766 | 0.63835 | 0.75591 |
| O240 | 0.32359 | 0.54916 | 0.79886 |
| O241 | 0.08864 | 0.55471 | 0.825   |
| O242 | 0.4316  | 0.37499 | 0.58291 |
| O243 | 0.40511 | 0.50479 | 0.57364 |
| O244 | 0.40136 | 0.63817 | 0.56429 |
| O245 | 0.19665 | 0.36791 | 0.62099 |
| O246 | 0.1958  | 0.49632 | 0.57082 |
| O247 | 0.19067 | 0.63071 | 0.56427 |
| O248 | 0.99568 | 0.46344 | 0.79825 |
| O249 | 0.98376 | 0.63544 | 0.78715 |
| O250 | 0.14097 | 0.56473 | 0.21477 |
| O251 | 0.1849  | 0.55984 | 0.39956 |
| O252 | 0.29841 | 0.56544 | 0.50172 |
| O253 | 0.41233 | 0.56919 | 0.40094 |
| O254 | 0.39571 | 0.5658  | 0.20535 |
| O255 | 0.26968 | 0.54036 | 0.25073 |
| O256 | 0.13943 | 0.3251  | 0.25087 |
| O257 | 0.19083 | 0.35253 | 0.42609 |
| O258 | 0.30909 | 0.35492 | 0.5147  |
| O259 | 0.41362 | 0.33326 | 0.39606 |
| O260 | 0.39329 | 0.34215 | 0.2012  |
| O261 | 0.26953 | 0.35106 | 0.26716 |
| O262 | 0.178   | 0.44815 | 0.28906 |
| O263 | 0.4158  | 0.4526  | 0.308   |
| O264 | 0.06516 | 0.626   | 0.08142 |
| O265 | 0.08075 | 0.49401 | 0.06819 |



|      |         |         |         |
|------|---------|---------|---------|
| O266 | 0.11212 | 0.36368 | 0.06487 |
| O267 | 0.30125 | 0.63159 | 0.11371 |
| O268 | 0.322   | 0.50062 | 0.07673 |
| O269 | 0.29561 | 0.36798 | 0.07256 |
| O270 | 0.51359 | 0.54284 | 0.2784  |
| O271 | 0.51343 | 0.36474 | 0.27317 |
| O272 | 0.43989 | 0.75067 | 0.64693 |
| O273 | 0.19544 | 0.74856 | 0.65134 |
| O274 | 0.27151 | 0.75034 | 0.04418 |
| O275 | 0.10763 | 0.75079 | 0.05834 |
| O276 | 0.06336 | 0.24989 | 0.13585 |
| O277 | 0.30489 | 0.24827 | 0.1502  |
| O278 | 0.22713 | 0.25125 | 0.54429 |
| O279 | 0.39114 | 0.25149 | 0.54776 |
| O280 | 0.5592  | 0.25103 | 0.35049 |
| O281 | 0.80096 | 0.24188 | 0.33853 |
| O282 | 0.72906 | 0.24684 | 0.95466 |
| O283 | 0.89166 | 0.25034 | 0.9446  |
| O284 | 0.93884 | 0.75044 | 0.86493 |
| O285 | 0.68893 | 0.75207 | 0.85855 |
| O286 | 0.76863 | 0.74606 | 0.44205 |
| O287 | 0.60648 | 0.75101 | 0.4515  |
| O288 | 0.95838 | 0.25429 | 0.42072 |
| O289 | 0.90313 | 0.1901  | 0.56251 |
| O290 | 0.89719 | 0.31954 | 0.55906 |
| O291 | 1.00538 | 0.25494 | 0.59507 |
| GA29 | 0.94199 | 0.40115 | 0.63343 |
| H293 | 0.93998 | 0.28916 | 0.37148 |
| H294 | 0.83791 | 0.34339 | 0.49309 |
| H295 | 0.87022 | 0.16942 | 0.51522 |
| H296 | 0.98539 | 0.35084 | 0.7023  |
| H297 | 1.00579 | 0.29127 | 0.6475  |
| H298 | 0.92465 | 0.464   | 0.47338 |
| H299 | 1.01004 | 0.37684 | 0.43377 |
| H300 | 0.06973 | 0.41732 | 0.51071 |
| H301 | 0.04135 | 0.4567  | 0.39985 |
| H302 | 0.00087 | 0.56259 | 0.4846  |
| H303 | 0.03337 | 0.53323 | 0.59947 |
| H304 | 0.94844 | 0.55929 | 0.59168 |
| AL30 | 0.81709 | 0.32536 | 0.31765 |
| AL30 | 0.80522 | 0.47642 | 0.7026  |
| P307 | 0.93912 | 0.25656 | 0.53317 |
| C308 | 0.96929 | 0.46159 | 0.52112 |
| C309 | 0.02535 | 0.42583 | 0.46406 |

|            |         |         |         |
|------------|---------|---------|---------|
| C310       | 0.98864 | 0.53289 | 0.55183 |
| <b>TS2</b> |         |         |         |
| SI2        | 0.42407 | 0.05806 | 0.64834 |
| SI3        | 0.30564 | 0.0283  | 0.7945  |
| SI4        | 0.28034 | 0.05982 | 0.01515 |
| SI5        | 0.12093 | 0.06383 | 0.01482 |
| SI6        | 0.06751 | 0.02898 | 0.80269 |
| SI7        | 0.17993 | 0.05768 | 0.66113 |
| SI8        | 0.42055 | 0.82694 | 0.67347 |
| SI9        | 0.30439 | 0.8699  | 0.81341 |
| SI10       | 0.26637 | 0.82934 | 0.03207 |
| SI11       | 0.11193 | 0.8273  | 0.01855 |
| SI12       | 0.06502 | 0.87128 | 0.80389 |
| SI13       | 0.18274 | 0.82854 | 0.67661 |
| SI14       | 0.07594 | 0.94288 | 0.15383 |
| SI15       | 0.19523 | 0.97241 | 0.29702 |
| SI16       | 0.21832 | 0.93865 | 0.51903 |
| SI17       | 0.37816 | 0.9344  | 0.51699 |
| SI18       | 0.43136 | 0.96926 | 0.30617 |
| SI19       | 0.32006 | 0.94355 | 0.16143 |
| SI20       | 0.0815  | 0.17278 | 0.1688  |
| SI21       | 0.1952  | 0.13053 | 0.31338 |
| SI22       | 0.23253 | 0.17264 | 0.52991 |
| SI23       | 0.38699 | 0.17435 | 0.51277 |
| SI24       | 0.43512 | 0.12746 | 0.3013  |
| SI25       | 0.316   | 0.16848 | 0.17541 |
| SI26       | 0.57694 | 0.55851 | 0.34936 |
| SI27       | 0.68717 | 0.53104 | 0.19313 |
| SI28       | 0.71387 | 0.56047 | 0.97972 |
| SI29       | 0.87204 | 0.56528 | 0.98019 |
| SI30       | 0.93222 | 0.53061 | 0.19009 |
| SI31       | 0.81282 | 0.55561 | 0.31971 |
| SI32       | 0.57864 | 0.32846 | 0.32964 |
| SI33       | 0.69375 | 0.37429 | 0.1885  |
| SI34       | 0.72998 | 0.32566 | 0.97353 |
| SI35       | 0.8846  | 0.3264  | 0.98438 |
| SI36       | 0.93677 | 0.37204 | 0.19646 |
| SI37       | 0.92439 | 0.44124 | 0.84721 |
| SI38       | 0.78067 | 0.43859 | 0.47584 |
| SI39       | 0.61991 | 0.43534 | 0.48805 |
| SI40       | 0.56722 | 0.47016 | 0.70142 |
| SI41       | 0.67976 | 0.43611 | 0.83818 |
| SI42       | 0.91824 | 0.67462 | 0.82528 |

|      |         |         |         |
|------|---------|---------|---------|
| SI43 | 0.80399 | 0.63522 | 0.68756 |
| SI44 | 0.76352 | 0.66674 | 0.46899 |
| SI45 | 0.60888 | 0.67323 | 0.48499 |
| SI46 | 0.56121 | 0.628   | 0.69847 |
| SI47 | 0.68086 | 0.67409 | 0.81943 |
| SI48 | 0.5765  | 0.94258 | 0.36234 |
| SI49 | 0.69344 | 0.96675 | 0.21594 |
| SI50 | 0.72044 | 0.93525 | 0.99594 |
| SI51 | 0.88016 | 0.9332  | 0.99648 |
| SI52 | 0.93152 | 0.96899 | 0.20542 |
| SI53 | 0.81902 | 0.94431 | 0.35388 |
| SI54 | 0.57782 | 0.17318 | 0.33475 |
| SI55 | 0.69526 | 0.12187 | 0.20022 |
| SI56 | 0.73404 | 0.16681 | 0.98127 |
| SI57 | 0.88842 | 0.17222 | 0.985   |
| SI58 | 0.93788 | 0.12585 | 0.19535 |
| SI59 | 0.81875 | 0.1639  | 0.32775 |
| SI60 | 0.92326 | 0.05293 | 0.85674 |
| SI61 | 0.80146 | 0.02336 | 0.71221 |
| SI62 | 0.78119 | 0.0648  | 0.49381 |
| SI63 | 0.6209  | 0.07003 | 0.49223 |
| SI64 | 0.56949 | 0.03007 | 0.70312 |
| SI65 | 0.6789  | 0.05112 | 0.85403 |
| SI66 | 0.92099 | 0.82749 | 0.83746 |
| SI67 | 0.80226 | 0.86639 | 0.69293 |
| SI68 | 0.76746 | 0.82402 | 0.47668 |
| SI69 | 0.61323 | 0.82632 | 0.49547 |
| SI70 | 0.56505 | 0.87235 | 0.70523 |
| SI71 | 0.68163 | 0.83012 | 0.83415 |
| SI72 | 0.42209 | 0.4442  | 0.64729 |
| SI73 | 0.30459 | 0.47255 | 0.79395 |
| SI74 | 0.283   | 0.43628 | 0.01572 |
| SI75 | 0.12549 | 0.43481 | 0.01398 |
| SI76 | 0.0754  | 0.47539 | 0.80614 |
| SI77 | 0.18116 | 0.44788 | 0.65448 |
| SI78 | 0.41995 | 0.67297 | 0.6667  |
| SI79 | 0.30203 | 0.62952 | 0.80531 |
| SI80 | 0.26536 | 0.67191 | 0.02267 |
| SI81 | 0.11113 | 0.67488 | 0.01183 |
| SI82 | 0.06428 | 0.63192 | 0.8011  |
| SI83 | 0.18095 | 0.67035 | 0.66932 |
| SI84 | 0.07573 | 0.55627 | 0.14398 |
| SI85 | 0.19582 | 0.52822 | 0.28736 |
| SI86 | 0.21835 | 0.56575 | 0.50794 |

|      |         |         |         |
|------|---------|---------|---------|
| SI87 | 0.3794  | 0.56805 | 0.50918 |
| SI88 | 0.43257 | 0.53029 | 0.29717 |
| SI89 | 0.32206 | 0.55533 | 0.15281 |
| SI90 | 0.08187 | 0.32653 | 0.16361 |
| SI91 | 0.19604 | 0.37    | 0.30818 |
| SI92 | 0.23249 | 0.33054 | 0.52718 |
| SI93 | 0.38701 | 0.32829 | 0.51196 |
| SI94 | 0.4346  | 0.37224 | 0.29722 |
| SI95 | 0.31698 | 0.32712 | 0.17205 |
| O96  | 0.35921 | 0.06366 | 0.7205  |
| O97  | 0.30915 | 0.06569 | 0.90218 |
| O98  | 0.20021 | 0.04699 | 0.01471 |
| O99  | 0.09272 | 0.06855 | 0.90187 |
| O100 | 0.10446 | 0.05935 | 0.70487 |
| O101 | 0.23045 | 0.03566 | 0.75052 |
| O102 | 0.36023 | 0.82664 | 0.75422 |
| O103 | 0.30539 | 0.8464  | 0.92905 |
| O104 | 0.18895 | 0.85356 | 0.02231 |
| O105 | 0.08515 | 0.83108 | 0.90476 |
| O106 | 0.10511 | 0.83886 | 0.70963 |
| O107 | 0.23059 | 0.8562  | 0.76628 |
| O108 | 0.32357 | 0.94897 | 0.80498 |
| O109 | 0.08543 | 0.94972 | 0.81571 |
| O110 | 0.43206 | 0.1275  | 0.5855  |
| O111 | 0.4178  | 0.99588 | 0.57014 |
| O112 | 0.39695 | 0.86416 | 0.57142 |
| O113 | 0.19868 | 0.13219 | 0.62163 |
| O114 | 0.18309 | 0.00352 | 0.57033 |
| O115 | 0.19716 | 0.86909 | 0.57374 |
| O116 | 0.9878  | 0.0389  | 0.78667 |
| O117 | 0.9851  | 0.86391 | 0.78528 |
| O118 | 0.14169 | 0.93629 | 0.22384 |
| O119 | 0.19356 | 0.9342  | 0.40394 |
| O120 | 0.29866 | 0.94869 | 0.52562 |
| O121 | 0.40064 | 0.92872 | 0.40111 |
| O122 | 0.39581 | 0.94329 | 0.20432 |
| O123 | 0.26996 | 0.96677 | 0.25068 |
| O124 | 0.14127 | 0.17349 | 0.25019 |
| O125 | 0.19232 | 0.15705 | 0.42741 |
| O126 | 0.30982 | 0.14852 | 0.51662 |
| O127 | 0.41401 | 0.17113 | 0.39877 |
| O128 | 0.39377 | 0.15439 | 0.20439 |
| O129 | 0.2698  | 0.1422  | 0.26792 |
| O130 | 0.17575 | 0.05132 | 0.30861 |

|      |         |         |         |
|------|---------|---------|---------|
| O131 | 0.41776 | 0.04907 | 0.32236 |
| O132 | 0.0664  | 0.87362 | 0.0911  |
| O133 | 0.08208 | 0.00509 | 0.07571 |
| O134 | 0.10675 | 0.1358  | 0.06745 |
| O135 | 0.30176 | 0.86825 | 0.1242  |
| O136 | 0.31585 | 0.99583 | 0.06849 |
| O137 | 0.29719 | 0.12933 | 0.07298 |
| O138 | 0.51065 | 0.95473 | 0.29442 |
| O139 | 0.51455 | 0.13693 | 0.27992 |
| O140 | 0.64142 | 0.56679 | 0.27761 |
| O141 | 0.6747  | 0.5671  | 0.08592 |
| O142 | 0.79338 | 0.5593  | 0.00275 |
| O143 | 0.91368 | 0.56546 | 0.08397 |
| O144 | 0.88942 | 0.56288 | 0.28135 |
| O145 | 0.76516 | 0.5412  | 0.22431 |
| O146 | 0.64081 | 0.33021 | 0.25323 |
| O147 | 0.69221 | 0.34349 | 0.07661 |
| O148 | 0.80756 | 0.35221 | 0.97678 |
| O149 | 0.91136 | 0.33111 | 0.09827 |
| O150 | 0.90203 | 0.33964 | 0.29518 |
| O151 | 0.76729 | 0.37015 | 0.23588 |
| O152 | 0.66793 | 0.45201 | 0.18701 |
| O153 | 0.91694 | 0.45064 | 0.18316 |
| O154 | 0.56508 | 0.62939 | 0.40655 |
| O155 | 0.58727 | 0.49978 | 0.43244 |
| O156 | 0.59803 | 0.36618 | 0.43361 |
| O157 | 0.79244 | 0.6247  | 0.37494 |
| O158 | 0.80889 | 0.4916  | 0.39556 |
| O159 | 0.80312 | 0.36054 | 0.44037 |
| O160 | 0.01061 | 0.54511 | 0.21465 |
| O161 | 0.01742 | 0.36614 | 0.20795 |
| O162 | 0.87748 | 0.42878 | 0.74688 |
| O163 | 0.81966 | 0.44587 | 0.58047 |
| O164 | 0.70091 | 0.44313 | 0.48422 |
| O165 | 0.59491 | 0.43171 | 0.60247 |
| O166 | 0.60238 | 0.44112 | 0.80114 |
| O167 | 0.72941 | 0.44835 | 0.74632 |
| O168 | 0.86192 | 0.68157 | 0.73876 |
| O169 | 0.80703 | 0.64781 | 0.56722 |
| O170 | 0.68568 | 0.64592 | 0.48713 |
| O171 | 0.57653 | 0.66698 | 0.59494 |
| O172 | 0.60312 | 0.66365 | 0.78764 |
| O173 | 0.72966 | 0.65876 | 0.72484 |
| O174 | 0.81888 | 0.55867 | 0.71634 |

|      |         |         |         |
|------|---------|---------|---------|
| O175 | 0.58304 | 0.54988 | 0.6886  |
| O176 | 0.93118 | 0.37289 | 0.91199 |
| O177 | 0.89282 | 0.50025 | 0.91361 |
| O178 | 0.88937 | 0.63405 | 0.92132 |
| O179 | 0.69056 | 0.3608  | 0.88238 |
| O180 | 0.69163 | 0.49084 | 0.92721 |
| O181 | 0.69725 | 0.62559 | 0.91271 |
| O182 | 0.48763 | 0.45762 | 0.7149  |
| O183 | 0.4816  | 0.6343  | 0.72187 |
| O184 | 0.63993 | 0.93053 | 0.28909 |
| O185 | 0.69663 | 0.92637 | 0.11089 |
| O186 | 0.80054 | 0.94753 | 0.98756 |
| O187 | 0.90173 | 0.92532 | 0.11277 |
| O188 | 0.89412 | 0.94937 | 0.30896 |
| O189 | 0.76712 | 0.96466 | 0.26597 |
| O190 | 0.64252 | 0.16707 | 0.26258 |
| O191 | 0.69865 | 0.15144 | 0.08775 |
| O192 | 0.81208 | 0.14401 | 0.98757 |
| O193 | 0.91914 | 0.16958 | 0.09689 |
| O194 | 0.89509 | 0.1523  | 0.29005 |
| O195 | 0.76839 | 0.12305 | 0.25362 |
| O196 | 0.6703  | 0.04413 | 0.19747 |
| O197 | 0.92033 | 0.04741 | 0.17616 |
| O198 | 0.56584 | 0.87592 | 0.43051 |
| O199 | 0.58715 | 0.00605 | 0.43687 |
| O200 | 0.59258 | 0.13871 | 0.44278 |
| O201 | 0.80589 | 0.86816 | 0.39252 |
| O202 | 0.81175 | 0.99612 | 0.44733 |
| O203 | 0.81511 | 0.13134 | 0.44185 |
| O204 | 0.01035 | 0.95354 | 0.22319 |
| O205 | 0.01721 | 0.13501 | 0.21773 |
| O206 | 0.857   | 0.05319 | 0.78759 |
| O207 | 0.80012 | 0.06917 | 0.61147 |
| O208 | 0.70121 | 0.06623 | 0.47634 |
| O209 | 0.60237 | 0.07116 | 0.61005 |
| O210 | 0.60399 | 0.05222 | 0.80783 |
| O211 | 0.72893 | 0.02586 | 0.76589 |
| O212 | 0.8586  | 0.83148 | 0.7614  |
| O213 | 0.80486 | 0.83129 | 0.58382 |
| O214 | 0.69079 | 0.85109 | 0.48764 |
| O215 | 0.58936 | 0.82655 | 0.61134 |
| O216 | 0.60443 | 0.84753 | 0.80503 |
| O217 | 0.72879 | 0.85572 | 0.74234 |
| O218 | 0.8182  | 0.94617 | 0.68229 |

|      |         |         |         |
|------|---------|---------|---------|
| O219 | 0.58164 | 0.95058 | 0.68145 |
| O220 | 0.93201 | 0.12609 | 0.90932 |
| O221 | 0.91918 | 0.99555 | 0.94357 |
| O222 | 0.90095 | 0.86342 | 0.94215 |
| O223 | 0.69759 | 0.12618 | 0.89158 |
| O224 | 0.68207 | 0.9998  | 0.94839 |
| O225 | 0.70107 | 0.86699 | 0.93768 |
| O226 | 0.49062 | 0.04703 | 0.71526 |
| O227 | 0.48515 | 0.86387 | 0.72289 |
| O228 | 0.35787 | 0.43673 | 0.72036 |
| O229 | 0.30321 | 0.43174 | 0.89873 |
| O230 | 0.20382 | 0.45235 | 0.03059 |
| O231 | 0.10881 | 0.43216 | 0.89556 |
| O232 | 0.10558 | 0.45048 | 0.69962 |
| O233 | 0.23081 | 0.46987 | 0.74423 |
| O234 | 0.3553  | 0.67078 | 0.73902 |
| O235 | 0.30233 | 0.66187 | 0.91606 |
| O236 | 0.18793 | 0.64786 | 0.01238 |
| O237 | 0.08385 | 0.67708 | 0.8977  |
| O238 | 0.1033  | 0.65932 | 0.70246 |
| O239 | 0.22818 | 0.63648 | 0.75513 |
| O240 | 0.32409 | 0.55096 | 0.81143 |
| O241 | 0.08765 | 0.55501 | 0.82396 |
| O242 | 0.43224 | 0.37498 | 0.58471 |
| O243 | 0.41273 | 0.50546 | 0.56846 |
| O244 | 0.40194 | 0.63829 | 0.56023 |
| O245 | 0.1967  | 0.37227 | 0.61655 |
| O246 | 0.18626 | 0.49984 | 0.5614  |
| O247 | 0.19362 | 0.63432 | 0.56212 |
| O248 | 0.99576 | 0.46235 | 0.80127 |
| O249 | 0.98427 | 0.63621 | 0.78133 |
| O250 | 0.14187 | 0.5627  | 0.21301 |
| O251 | 0.19259 | 0.56781 | 0.39321 |
| O252 | 0.29893 | 0.55988 | 0.51311 |
| O253 | 0.40568 | 0.56974 | 0.39524 |
| O254 | 0.39651 | 0.5613  | 0.19909 |
| O255 | 0.27048 | 0.53418 | 0.24139 |
| O256 | 0.14065 | 0.32793 | 0.24655 |
| O257 | 0.19356 | 0.34483 | 0.42301 |
| O258 | 0.30989 | 0.35483 | 0.51583 |
| O259 | 0.41402 | 0.332   | 0.39811 |
| O260 | 0.39454 | 0.34014 | 0.20277 |
| O261 | 0.26997 | 0.35663 | 0.2616  |
| O262 | 0.17735 | 0.44937 | 0.30239 |

|      |         |         |         |
|------|---------|---------|---------|
| O263 | 0.41502 | 0.45097 | 0.3096  |
| O264 | 0.06606 | 0.62497 | 0.07994 |
| O265 | 0.08094 | 0.49303 | 0.06689 |
| O266 | 0.10726 | 0.36189 | 0.06068 |
| O267 | 0.30188 | 0.62778 | 0.10775 |
| O268 | 0.32384 | 0.49789 | 0.06646 |
| O269 | 0.30077 | 0.36467 | 0.06704 |
| O270 | 0.51212 | 0.54111 | 0.28187 |
| O271 | 0.51426 | 0.36446 | 0.27772 |
| O272 | 0.43976 | 0.75037 | 0.64462 |
| O273 | 0.19742 | 0.74954 | 0.65665 |
| O274 | 0.26989 | 0.74978 | 0.05619 |
| O275 | 0.10675 | 0.75019 | 0.05764 |
| O276 | 0.06223 | 0.24942 | 0.13909 |
| O277 | 0.30332 | 0.24777 | 0.15595 |
| O278 | 0.22894 | 0.25187 | 0.55619 |
| O279 | 0.39208 | 0.25143 | 0.55143 |
| O280 | 0.56068 | 0.25123 | 0.35636 |
| O281 | 0.79942 | 0.24142 | 0.33328 |
| O282 | 0.72869 | 0.24552 | 0.95452 |
| O283 | 0.89085 | 0.24938 | 0.94575 |
| O284 | 0.93869 | 0.74966 | 0.86186 |
| O285 | 0.69183 | 0.75089 | 0.85528 |
| O286 | 0.76925 | 0.74604 | 0.44187 |
| O287 | 0.60621 | 0.75113 | 0.45025 |
| O288 | 0.95212 | 0.25271 | 0.42435 |
| O289 | 0.9082  | 0.19179 | 0.57426 |
| O290 | 0.89091 | 0.31933 | 0.56022 |
| O291 | 0.00527 | 0.27086 | 0.59794 |
| GA29 | 0.9257  | 0.40389 | 0.61882 |
| H293 | 0.93889 | 0.28992 | 0.37685 |
| H294 | 0.83631 | 0.33905 | 0.49256 |
| H295 | 0.87516 | 0.17169 | 0.52787 |
| H296 | 0.97934 | 0.35566 | 0.70857 |
| H297 | 0.9922  | 0.32149 | 0.66912 |
| H298 | 0.92784 | 0.46667 | 0.46253 |
| H299 | 0.01546 | 0.37996 | 0.43299 |
| H300 | 0.07006 | 0.42046 | 0.51763 |
| H301 | 0.047   | 0.46089 | 0.40463 |
| H302 | 0.9982  | 0.56647 | 0.49096 |
| H303 | 0.02838 | 0.5334  | 0.60516 |
| H304 | 0.943   | 0.55722 | 0.59386 |
| AL30 | 0.81627 | 0.32484 | 0.31553 |
| AL30 | 0.80465 | 0.47448 | 0.7027  |



|                                                    |         |         |         |
|----------------------------------------------------|---------|---------|---------|
| P307                                               | 0.94189 | 0.25926 | 0.53999 |
| C308                                               | 0.96936 | 0.46326 | 0.51642 |
| C309                                               | 0.02845 | 0.42881 | 0.46587 |
| C310                                               | 0.9852  | 0.53374 | 0.55459 |
| <b>C<sub>3</sub>H<sub>7</sub>Ga+H<sub>2</sub>*</b> |         |         |         |
| SI2                                                | 0.42441 | 0.05737 | 0.64869 |
| SI3                                                | 0.30479 | 0.02743 | 0.79368 |
| SI4                                                | 0.28105 | 0.06061 | 0.0147  |
| SI5                                                | 0.12148 | 0.06376 | 0.01526 |
| SI6                                                | 0.06804 | 0.02969 | 0.80278 |
| SI7                                                | 0.17939 | 0.05649 | 0.65862 |
| SI8                                                | 0.42044 | 0.82656 | 0.67342 |
| SI9                                                | 0.30365 | 0.86919 | 0.81355 |
| SI10                                               | 0.26591 | 0.82917 | 0.03262 |
| SI11                                               | 0.11151 | 0.8273  | 0.01844 |
| SI12                                               | 0.06418 | 0.87151 | 0.80364 |
| SI13                                               | 0.18195 | 0.82836 | 0.67637 |
| SI14                                               | 0.07577 | 0.94311 | 0.15362 |
| SI15                                               | 0.19597 | 0.97298 | 0.29657 |
| SI16                                               | 0.21862 | 0.93771 | 0.51841 |
| SI17                                               | 0.37818 | 0.93441 | 0.51724 |
| SI18                                               | 0.43118 | 0.96944 | 0.30651 |
| SI19                                               | 0.3207  | 0.94481 | 0.15929 |
| SI20                                               | 0.08151 | 0.17252 | 0.16957 |
| SI21                                               | 0.19621 | 0.13044 | 0.31356 |
| SI22                                               | 0.23357 | 0.17277 | 0.53029 |
| SI23                                               | 0.38803 | 0.17432 | 0.51429 |
| SI24                                               | 0.43624 | 0.12783 | 0.30244 |
| SI25                                               | 0.31718 | 0.1682  | 0.17565 |
| SI26                                               | 0.57478 | 0.56062 | 0.34443 |
| SI27                                               | 0.68668 | 0.53147 | 0.18879 |
| SI28                                               | 0.714   | 0.55778 | 0.97475 |
| SI29                                               | 0.87228 | 0.56157 | 0.9726  |
| SI30                                               | 0.93191 | 0.52946 | 0.18605 |
| SI31                                               | 0.81274 | 0.56007 | 0.31227 |
| SI32                                               | 0.58043 | 0.32923 | 0.32848 |
| SI33                                               | 0.69379 | 0.37314 | 0.18267 |
| SI34                                               | 0.72775 | 0.32442 | 0.97157 |
| SI35                                               | 0.88196 | 0.32623 | 0.98614 |
| SI36                                               | 0.93596 | 0.37109 | 0.19948 |
| SI37                                               | 0.92356 | 0.43712 | 0.8384  |
| SI38                                               | 0.77667 | 0.44503 | 0.46705 |
| SI39                                               | 0.61761 | 0.43977 | 0.48344 |

|      |         |         |         |
|------|---------|---------|---------|
| SI40 | 0.56786 | 0.47075 | 0.69937 |
| SI41 | 0.68039 | 0.43375 | 0.83374 |
| SI42 | 0.91703 | 0.67434 | 0.8235  |
| SI43 | 0.80382 | 0.63486 | 0.68508 |
| SI44 | 0.76399 | 0.66731 | 0.46706 |
| SI45 | 0.60945 | 0.67381 | 0.48188 |
| SI46 | 0.56208 | 0.62821 | 0.69649 |
| SI47 | 0.68151 | 0.67362 | 0.81631 |
| SI48 | 0.57694 | 0.94322 | 0.36348 |
| SI49 | 0.69465 | 0.96686 | 0.21824 |
| SI50 | 0.72075 | 0.93342 | 0.99728 |
| SI51 | 0.88054 | 0.93278 | 0.99807 |
| SI52 | 0.9311  | 0.97009 | 0.20811 |
| SI53 | 0.81988 | 0.94486 | 0.35791 |
| SI54 | 0.57886 | 0.17395 | 0.33811 |
| SI55 | 0.69718 | 0.12249 | 0.20439 |
| SI56 | 0.73335 | 0.16588 | 0.98468 |
| SI57 | 0.88707 | 0.17174 | 0.98977 |
| SI58 | 0.9377  | 0.12729 | 0.20035 |
| SI59 | 0.81981 | 0.16554 | 0.33311 |
| SI60 | 0.92361 | 0.05365 | 0.86    |
| SI61 | 0.80194 | 0.02407 | 0.71514 |
| SI62 | 0.7822  | 0.06603 | 0.49694 |
| SI63 | 0.62159 | 0.07073 | 0.49426 |
| SI64 | 0.56947 | 0.0287  | 0.70464 |
| SI65 | 0.6784  | 0.04988 | 0.85621 |
| SI66 | 0.92083 | 0.82708 | 0.8402  |
| SI67 | 0.80171 | 0.86729 | 0.69676 |
| SI68 | 0.76791 | 0.82479 | 0.48044 |
| SI69 | 0.61381 | 0.82696 | 0.49736 |
| SI70 | 0.56503 | 0.87097 | 0.70717 |
| SI71 | 0.68142 | 0.82914 | 0.83652 |
| SI72 | 0.42246 | 0.44574 | 0.64643 |
| SI73 | 0.30353 | 0.47367 | 0.79386 |
| SI74 | 0.28243 | 0.43382 | 0.01328 |
| SI75 | 0.12469 | 0.43331 | 0.01135 |
| SI76 | 0.07471 | 0.47181 | 0.80191 |
| SI77 | 0.18201 | 0.44898 | 0.65004 |
| SI78 | 0.42058 | 0.67208 | 0.66451 |
| SI79 | 0.30175 | 0.63006 | 0.80577 |
| SI80 | 0.26502 | 0.67301 | 0.02088 |
| SI81 | 0.11068 | 0.67431 | 0.00977 |
| SI82 | 0.06229 | 0.62987 | 0.79924 |
| SI83 | 0.18048 | 0.66964 | 0.66922 |

|      |         |         |         |
|------|---------|---------|---------|
| SI84 | 0.07577 | 0.55519 | 0.14177 |
| SI85 | 0.19621 | 0.52765 | 0.28668 |
| SI86 | 0.21909 | 0.56683 | 0.5059  |
| SI87 | 0.37986 | 0.56814 | 0.50663 |
| SI88 | 0.43136 | 0.53067 | 0.29343 |
| SI89 | 0.32082 | 0.55381 | 0.14771 |
| SI90 | 0.08079 | 0.32671 | 0.16315 |
| SI91 | 0.19677 | 0.36999 | 0.30767 |
| SI92 | 0.23369 | 0.32977 | 0.52568 |
| SI93 | 0.38842 | 0.32837 | 0.51228 |
| SI94 | 0.43644 | 0.37214 | 0.29706 |
| SI95 | 0.31805 | 0.32695 | 0.17216 |
| O96  | 0.35919 | 0.06197 | 0.72022 |
| O97  | 0.30626 | 0.06677 | 0.89991 |
| O98  | 0.20091 | 0.04787 | 0.01998 |
| O99  | 0.09629 | 0.0686  | 0.90068 |
| O100 | 0.10412 | 0.05894 | 0.70336 |
| O101 | 0.23031 | 0.03345 | 0.74679 |
| O102 | 0.35939 | 0.8266  | 0.75299 |
| O103 | 0.30452 | 0.84402 | 0.92845 |
| O104 | 0.18854 | 0.85355 | 0.0227  |
| O105 | 0.08476 | 0.83181 | 0.90471 |
| O106 | 0.10437 | 0.83936 | 0.70924 |
| O107 | 0.22993 | 0.85641 | 0.76565 |
| O108 | 0.32286 | 0.94841 | 0.80809 |
| O109 | 0.08401 | 0.95007 | 0.81536 |
| O110 | 0.43279 | 0.1275  | 0.58755 |
| O111 | 0.41852 | 0.99614 | 0.5687  |
| O112 | 0.39816 | 0.86426 | 0.57103 |
| O113 | 0.19829 | 0.13112 | 0.61963 |
| O114 | 0.1815  | 0.0025  | 0.56739 |
| O115 | 0.19668 | 0.86824 | 0.57286 |
| O116 | 0.98837 | 0.04162 | 0.78953 |
| O117 | 0.9843  | 0.86314 | 0.78551 |
| O118 | 0.14141 | 0.93772 | 0.22414 |
| O119 | 0.1969  | 0.93269 | 0.40194 |
| O120 | 0.29875 | 0.94839 | 0.52958 |
| O121 | 0.39863 | 0.92908 | 0.40042 |
| O122 | 0.39606 | 0.94412 | 0.20389 |
| O123 | 0.26976 | 0.96961 | 0.24653 |
| O124 | 0.14233 | 0.17283 | 0.24932 |
| O125 | 0.19422 | 0.15923 | 0.42641 |
| O126 | 0.31082 | 0.14846 | 0.51832 |
| O127 | 0.41475 | 0.17104 | 0.4002  |

|      |         |         |         |
|------|---------|---------|---------|
| O128 | 0.39496 | 0.15495 | 0.20554 |
| O129 | 0.27062 | 0.14002 | 0.26652 |
| O130 | 0.17594 | 0.05136 | 0.31328 |
| O131 | 0.41866 | 0.04941 | 0.32268 |
| O132 | 0.06643 | 0.8731  | 0.09251 |
| O133 | 0.08187 | 0.0043  | 0.07353 |
| O134 | 0.10503 | 0.13536 | 0.06749 |
| O135 | 0.30186 | 0.86942 | 0.12299 |
| O136 | 0.31811 | 0.99637 | 0.06519 |
| O137 | 0.29984 | 0.12994 | 0.0718  |
| O138 | 0.51043 | 0.95423 | 0.29655 |
| O139 | 0.51576 | 0.13787 | 0.28223 |
| O140 | 0.63993 | 0.56572 | 0.27342 |
| O141 | 0.67385 | 0.5656  | 0.08014 |
| O142 | 0.79376 | 0.55503 | 0.997   |
| O143 | 0.9152  | 0.55764 | 0.07502 |
| O144 | 0.88872 | 0.56781 | 0.2716  |
| O145 | 0.76414 | 0.54641 | 0.21794 |
| O146 | 0.6429  | 0.33004 | 0.25255 |
| O147 | 0.68543 | 0.34402 | 0.07019 |
| O148 | 0.80477 | 0.35159 | 0.98167 |
| O149 | 0.91188 | 0.3329  | 0.09805 |
| O150 | 0.9009  | 0.33746 | 0.29731 |
| O151 | 0.76938 | 0.36501 | 0.22087 |
| O152 | 0.67077 | 0.45169 | 0.18598 |
| O153 | 0.9156  | 0.44979 | 0.1908  |
| O154 | 0.56574 | 0.63223 | 0.40071 |
| O155 | 0.57986 | 0.5017  | 0.42858 |
| O156 | 0.59979 | 0.36886 | 0.43076 |
| O157 | 0.79328 | 0.6283  | 0.37042 |
| O158 | 0.80886 | 0.49491 | 0.38569 |
| O159 | 0.79256 | 0.36602 | 0.43049 |
| O160 | 0.01016 | 0.54384 | 0.21105 |
| O161 | 0.01668 | 0.36507 | 0.21105 |
| O162 | 0.87796 | 0.42602 | 0.73568 |
| O163 | 0.81583 | 0.45222 | 0.57141 |
| O164 | 0.69735 | 0.45528 | 0.47616 |
| O165 | 0.59423 | 0.43391 | 0.59839 |
| O166 | 0.603   | 0.43851 | 0.79676 |
| O167 | 0.7303  | 0.44736 | 0.7427  |
| O168 | 0.86077 | 0.68222 | 0.73694 |
| O169 | 0.80747 | 0.64589 | 0.56431 |
| O170 | 0.6861  | 0.64601 | 0.48348 |
| O171 | 0.57659 | 0.66531 | 0.59119 |

|      |         |         |         |
|------|---------|---------|---------|
| O172 | 0.60347 | 0.66568 | 0.78458 |
| O173 | 0.72922 | 0.65907 | 0.7202  |
| O174 | 0.81882 | 0.55865 | 0.71616 |
| O175 | 0.5853  | 0.55035 | 0.69032 |
| O176 | 0.92581 | 0.37109 | 0.90822 |
| O177 | 0.89376 | 0.49983 | 0.89948 |
| O178 | 0.88862 | 0.63259 | 0.91887 |
| O179 | 0.69202 | 0.35798 | 0.87577 |
| O180 | 0.69114 | 0.48775 | 0.92404 |
| O181 | 0.69813 | 0.62266 | 0.90666 |
| O182 | 0.48809 | 0.46001 | 0.71339 |
| O183 | 0.48244 | 0.63387 | 0.71982 |
| O184 | 0.63986 | 0.93062 | 0.28935 |
| O185 | 0.69867 | 0.92652 | 0.11323 |
| O186 | 0.8008  | 0.9453  | 0.98553 |
| O187 | 0.90028 | 0.92726 | 0.11533 |
| O188 | 0.89489 | 0.94948 | 0.31224 |
| O189 | 0.76774 | 0.96441 | 0.27    |
| O190 | 0.64446 | 0.16671 | 0.26818 |
| O191 | 0.69867 | 0.15298 | 0.09232 |
| O192 | 0.8112  | 0.14219 | 0.99111 |
| O193 | 0.91773 | 0.17028 | 0.1017  |
| O194 | 0.89694 | 0.15592 | 0.29588 |
| O195 | 0.77076 | 0.12457 | 0.25642 |
| O196 | 0.67271 | 0.0446  | 0.20004 |
| O197 | 0.91907 | 0.04894 | 0.18242 |
| O198 | 0.56655 | 0.87739 | 0.43357 |
| O199 | 0.58851 | 0.00762 | 0.43582 |
| O200 | 0.59245 | 0.13983 | 0.44688 |
| O201 | 0.80721 | 0.86887 | 0.39724 |
| O202 | 0.81244 | 0.99687 | 0.45103 |
| O203 | 0.81666 | 0.13181 | 0.4456  |
| O204 | 0.01019 | 0.95455 | 0.22273 |
| O205 | 0.01749 | 0.13526 | 0.22021 |
| O206 | 0.85751 | 0.05413 | 0.79041 |
| O207 | 0.80155 | 0.07028 | 0.61474 |
| O208 | 0.70209 | 0.06767 | 0.47981 |
| O209 | 0.60247 | 0.06981 | 0.61183 |
| O210 | 0.60368 | 0.05107 | 0.80943 |
| O211 | 0.72918 | 0.0267  | 0.76784 |
| O212 | 0.857   | 0.83245 | 0.7671  |
| O213 | 0.80462 | 0.83135 | 0.58825 |
| O214 | 0.69127 | 0.85214 | 0.49055 |
| O215 | 0.58947 | 0.82538 | 0.61306 |

|      |         |          |         |
|------|---------|----------|---------|
| O216 | 0.60402 | 0.84581  | 0.80723 |
| O217 | 0.72796 | 0.85763  | 0.74575 |
| O218 | 0.81854 | 0.94687  | 0.68497 |
| O219 | 0.58185 | 0.94919  | 0.68351 |
| O220 | 0.93186 | 0.12607  | 0.91488 |
| O221 | 0.91962 | 0.99501  | 0.94479 |
| O222 | 0.90353 | 0.86272  | 0.94633 |
| O223 | 0.69602 | 0.12433  | 0.89691 |
| O224 | 0.68161 | -0.00298 | 0.94857 |
| O225 | 0.70016 | 0.86435  | 0.94179 |
| O226 | 0.49052 | 0.04554  | 0.71623 |
| O227 | 0.485   | 0.86274  | 0.7242  |
| O228 | 0.35848 | 0.44084  | 0.72014 |
| O229 | 0.29969 | 0.42889  | 0.89511 |
| O230 | 0.20321 | 0.44763  | 0.0321  |
| O231 | 0.1105  | 0.43112  | 0.89212 |
| O232 | 0.10665 | 0.45063  | 0.69511 |
| O233 | 0.2313  | 0.47294  | 0.73917 |
| O234 | 0.35555 | 0.66767  | 0.73578 |
| O235 | 0.30226 | 0.66706  | 0.91355 |
| O236 | 0.18787 | 0.64834  | 0.00869 |
| O237 | 0.08216 | 0.67448  | 0.89632 |
| O238 | 0.10307 | 0.65675  | 0.70187 |
| O239 | 0.22808 | 0.63619  | 0.75479 |
| O240 | 0.32183 | 0.55138  | 0.81996 |
| O241 | 0.08159 | 0.55189  | 0.82197 |
| O242 | 0.4318  | 0.375    | 0.5875  |
| O243 | 0.41376 | 0.50508  | 0.56416 |
| O244 | 0.40419 | 0.6381   | 0.55692 |
| O245 | 0.19851 | 0.37328  | 0.61351 |
| O246 | 0.18598 | 0.50021  | 0.5559  |
| O247 | 0.19362 | 0.63469  | 0.56131 |
| O248 | 0.99673 | 0.45129  | 0.793   |
| O249 | 0.98276 | 0.63664  | 0.77746 |
| O250 | 0.14103 | 0.56022  | 0.2127  |
| O251 | 0.19574 | 0.57046  | 0.38998 |
| O252 | 0.2995  | 0.56073  | 0.51506 |
| O253 | 0.40316 | 0.5697   | 0.39118 |
| O254 | 0.39494 | 0.55965  | 0.19454 |
| O255 | 0.26952 | 0.53157  | 0.23589 |
| O256 | 0.14155 | 0.33005  | 0.24273 |
| O257 | 0.19453 | 0.34092  | 0.4207  |
| O258 | 0.31096 | 0.35397  | 0.5127  |
| O259 | 0.41751 | 0.33286  | 0.39961 |

|      |          |         |         |
|------|----------|---------|---------|
| O260 | 0.39548  | 0.3389  | 0.20433 |
| O261 | 0.27058  | 0.35838 | 0.25967 |
| O262 | 0.17819  | 0.44947 | 0.30883 |
| O263 | 0.41673  | 0.45091 | 0.3077  |
| O264 | 0.06683  | 0.6248  | 0.08001 |
| O265 | 0.0814   | 0.49312 | 0.06273 |
| O266 | 0.10265  | 0.36141 | 0.05796 |
| O267 | 0.30125  | 0.62663 | 0.10345 |
| O268 | 0.32274  | 0.49705 | 0.06041 |
| O269 | 0.30352  | 0.3634  | 0.06562 |
| O270 | 0.51002  | 0.54535 | 0.27597 |
| O271 | 0.5159   | 0.36442 | 0.27553 |
| O272 | 0.43925  | 0.74996 | 0.64436 |
| O273 | 0.19598  | 0.74914 | 0.65775 |
| O274 | 0.26885  | 0.74991 | 0.05971 |
| O275 | 0.10597  | 0.74974 | 0.05505 |
| O276 | 0.06213  | 0.24913 | 0.14056 |
| O277 | 0.30331  | 0.24754 | 0.15843 |
| O278 | 0.22994  | 0.25171 | 0.55893 |
| O279 | 0.39326  | 0.25156 | 0.55208 |
| O280 | 0.56241  | 0.25241 | 0.35798 |
| O281 | 0.79881  | 0.2426  | 0.33999 |
| O282 | 0.72815  | 0.24406 | 0.95488 |
| O283 | 0.88791  | 0.24866 | 0.95004 |
| O284 | 0.93769  | 0.74881 | 0.86246 |
| O285 | 0.69352  | 0.74977 | 0.8547  |
| O286 | 0.76959  | 0.74718 | 0.44459 |
| O287 | 0.60731  | 0.75232 | 0.45021 |
| O288 | 0.95387  | 0.2627  | 0.44556 |
| O289 | 0.9204   | 0.20628 | 0.60406 |
| O290 | 0.86716  | 0.32222 | 0.55774 |
| O291 | -0.0203  | 0.3193  | 0.61918 |
| GA29 | 0.92177  | 0.40511 | 0.60485 |
| H293 | 0.93821  | 0.29338 | 0.38979 |
| H294 | 0.82118  | 0.34099 | 0.48771 |
| H295 | 0.89509  | 0.17498 | 0.56164 |
| H296 | 0.99735  | 0.2389  | 0.82525 |
| H297 | 1.01087  | 0.25906 | 0.78227 |
| H298 | 0.92562  | 0.47313 | 0.45222 |
| H299 | 0.01512  | 0.38931 | 0.41981 |
| H300 | 0.0659   | 0.42466 | 0.51452 |
| H301 | 0.04808  | 0.47126 | 0.40452 |
| H302 | -0.00428 | 0.57187 | 0.4931  |
| H303 | 0.0207   | 0.53516 | 0.60763 |

|                                     |         |         |         |
|-------------------------------------|---------|---------|---------|
| H304                                | 0.936   | 0.55967 | 0.5894  |
| AL30                                | 0.81391 | 0.32527 | 0.31239 |
| AL30                                | 0.80439 | 0.47482 | 0.6967  |
| P307                                | 0.93183 | 0.27739 | 0.55588 |
| C308                                | 0.96572 | 0.46817 | 0.50812 |
| C309                                | 0.02684 | 0.43608 | 0.45968 |
| C310                                | 0.97985 | 0.53726 | 0.55297 |
| <b>C<sub>3</sub>H<sub>7</sub>Ga</b> |         |         |         |
| SI2                                 | 0.42376 | 0.05896 | 0.64862 |
| SI3                                 | 0.30642 | 0.02938 | 0.79536 |
| SI4                                 | 0.28056 | 0.0585  | 0.01693 |
| SI5                                 | 0.12122 | 0.06309 | 0.01434 |
| SI6                                 | 0.06703 | 0.02908 | 0.80206 |
| SI7                                 | 0.18078 | 0.05917 | 0.66408 |
| SI8                                 | 0.42076 | 0.82726 | 0.67504 |
| SI9                                 | 0.304   | 0.87051 | 0.81201 |
| SI10                                | 0.26654 | 0.83035 | 0.03104 |
| SI11                                | 0.11218 | 0.82738 | 0.01812 |
| SI12                                | 0.06501 | 0.87103 | 0.80308 |
| SI13                                | 0.18241 | 0.82715 | 0.67607 |
| SI14                                | 0.07618 | 0.94201 | 0.154   |
| SI15                                | 0.19453 | 0.97108 | 0.29771 |
| SI16                                | 0.21803 | 0.9385  | 0.52016 |
| SI17                                | 0.37831 | 0.93423 | 0.51705 |
| SI18                                | 0.43287 | 0.96884 | 0.30649 |
| SI19                                | 0.3199  | 0.9414  | 0.16534 |
| SI20                                | 0.08238 | 0.17291 | 0.1678  |
| SI21                                | 0.19574 | 0.12978 | 0.3112  |
| SI22                                | 0.23273 | 0.17152 | 0.52768 |
| SI23                                | 0.38727 | 0.17427 | 0.51125 |
| SI24                                | 0.43578 | 0.1271  | 0.30005 |
| SI25                                | 0.31657 | 0.16852 | 0.17458 |
| SI26                                | 0.57682 | 0.55924 | 0.34664 |
| SI27                                | 0.68833 | 0.53177 | 0.19098 |
| SI28                                | 0.71461 | 0.55886 | 0.97704 |
| SI29                                | 0.87296 | 0.56211 | 0.97587 |
| SI30                                | 0.93243 | 0.52946 | 0.18911 |
| SI31                                | 0.81318 | 0.5587  | 0.31602 |
| SI32                                | 0.57988 | 0.32888 | 0.32804 |
| SI33                                | 0.69466 | 0.37383 | 0.18428 |
| SI34                                | 0.72891 | 0.32531 | 0.97183 |
| SI35                                | 0.88343 | 0.32631 | 0.98589 |
| SI36                                | 0.93692 | 0.37073 | 0.1991  |



|      |         |         |         |
|------|---------|---------|---------|
| SI37 | 0.92459 | 0.43792 | 0.84088 |
| SI38 | 0.77698 | 0.44263 | 0.47083 |
| SI39 | 0.6174  | 0.43699 | 0.48583 |
| SI40 | 0.56594 | 0.46978 | 0.70012 |
| SI41 | 0.67943 | 0.43548 | 0.83521 |
| SI42 | 0.91723 | 0.67441 | 0.8262  |
| SI43 | 0.80466 | 0.63455 | 0.68662 |
| SI44 | 0.76425 | 0.66728 | 0.46864 |
| SI45 | 0.60965 | 0.67311 | 0.48485 |
| SI46 | 0.56185 | 0.62773 | 0.6988  |
| SI47 | 0.68233 | 0.67348 | 0.81844 |
| SI48 | 0.57784 | 0.94273 | 0.36155 |
| SI49 | 0.69453 | 0.96704 | 0.21492 |
| SI50 | 0.72076 | 0.93533 | 0.99465 |
| SI51 | 0.88032 | 0.93402 | 0.99638 |
| SI52 | 0.93184 | 0.96959 | 0.20625 |
| SI53 | 0.81931 | 0.9443  | 0.3531  |
| SI54 | 0.57847 | 0.17344 | 0.33361 |
| SI55 | 0.69685 | 0.12258 | 0.20035 |
| SI56 | 0.73433 | 0.16651 | 0.98064 |
| SI57 | 0.88839 | 0.17201 | 0.98521 |
| SI58 | 0.93831 | 0.12707 | 0.19668 |
| SI59 | 0.81998 | 0.16541 | 0.32962 |
| SI60 | 0.92339 | 0.05347 | 0.85637 |
| SI61 | 0.80196 | 0.0237  | 0.71184 |
| SI62 | 0.78228 | 0.0653  | 0.49324 |
| SI63 | 0.62172 | 0.07056 | 0.49151 |
| SI64 | 0.5695  | 0.03045 | 0.70202 |
| SI65 | 0.67895 | 0.05116 | 0.85242 |
| SI66 | 0.92067 | 0.82721 | 0.83828 |
| SI67 | 0.80287 | 0.86665 | 0.69263 |
| SI68 | 0.76762 | 0.82474 | 0.47675 |
| SI69 | 0.61345 | 0.82652 | 0.49549 |
| SI70 | 0.56526 | 0.87274 | 0.7052  |
| SI71 | 0.68235 | 0.82996 | 0.83307 |
| SI72 | 0.42073 | 0.44334 | 0.64797 |
| SI73 | 0.30636 | 0.47045 | 0.79691 |
| SI74 | 0.28326 | 0.43813 | 0.01856 |
| SI75 | 0.12567 | 0.43538 | 0.01293 |
| SI76 | 0.0744  | 0.47177 | 0.80335 |
| SI77 | 0.18462 | 0.44554 | 0.65826 |
| SI78 | 0.42064 | 0.67332 | 0.66813 |
| SI79 | 0.30266 | 0.62796 | 0.80456 |
| SI80 | 0.26538 | 0.67138 | 0.022   |

|      |         |         |         |
|------|---------|---------|---------|
| SI81 | 0.11115 | 0.67436 | 0.01149 |
| SI82 | 0.06278 | 0.62969 | 0.80146 |
| SI83 | 0.18028 | 0.66865 | 0.6698  |
| SI84 | 0.07567 | 0.55646 | 0.14351 |
| SI85 | 0.19446 | 0.52787 | 0.28772 |
| SI86 | 0.21899 | 0.56461 | 0.50792 |
| SI87 | 0.38017 | 0.56899 | 0.50893 |
| SI88 | 0.43436 | 0.53142 | 0.29649 |
| SI89 | 0.32103 | 0.55776 | 0.1572  |
| SI90 | 0.08286 | 0.32615 | 0.16441 |
| SI91 | 0.19575 | 0.3693  | 0.30873 |
| SI92 | 0.23289 | 0.33082 | 0.52649 |
| SI93 | 0.38751 | 0.32846 | 0.51012 |
| SI94 | 0.43593 | 0.37297 | 0.29579 |
| SI95 | 0.31687 | 0.32693 | 0.17397 |
| O96  | 0.3596  | 0.06609 | 0.72206 |
| O97  | 0.31294 | 0.06196 | 0.90594 |
| O98  | 0.20047 | 0.04655 | 0.01079 |
| O99  | 0.09109 | 0.06773 | 0.90253 |
| O100 | 0.1047  | 0.0607  | 0.70563 |
| O101 | 0.23053 | 0.04066 | 0.75608 |
| O102 | 0.36073 | 0.82628 | 0.75642 |
| O103 | 0.30517 | 0.85181 | 0.92951 |
| O104 | 0.18892 | 0.85428 | 0.02345 |
| O105 | 0.08613 | 0.83149 | 0.90401 |
| O106 | 0.1048  | 0.83825 | 0.70877 |
| O107 | 0.2304  | 0.85373 | 0.7664  |
| O108 | 0.32224 | 0.9493  | 0.79653 |
| O109 | 0.08506 | 0.94974 | 0.81323 |
| O110 | 0.43234 | 0.12782 | 0.58454 |
| O111 | 0.41561 | 0.99651 | 0.57156 |
| O112 | 0.39645 | 0.86454 | 0.57341 |
| O113 | 0.19892 | 0.13312 | 0.62146 |
| O114 | 0.18588 | 0.00292 | 0.57664 |
| O115 | 0.19769 | 0.86831 | 0.57394 |
| O116 | 0.98739 | 0.03935 | 0.78499 |
| O117 | 0.98504 | 0.86311 | 0.78592 |
| O118 | 0.14177 | 0.93408 | 0.22418 |
| O119 | 0.18887 | 0.93681 | 0.4072  |
| O120 | 0.29849 | 0.94724 | 0.51991 |
| O121 | 0.40412 | 0.92844 | 0.4028  |
| O122 | 0.39612 | 0.94161 | 0.20628 |
| O123 | 0.27035 | 0.96181 | 0.25687 |
| O124 | 0.14188 | 0.174   | 0.24977 |

|      |         |         |         |
|------|---------|---------|---------|
| O125 | 0.19193 | 0.15241 | 0.42702 |
| O126 | 0.31019 | 0.148   | 0.51535 |
| O127 | 0.41435 | 0.17085 | 0.39733 |
| O128 | 0.39429 | 0.15367 | 0.203   |
| O129 | 0.2706  | 0.14361 | 0.26826 |
| O130 | 0.17671 | 0.05075 | 0.30098 |
| O131 | 0.4185  | 0.04868 | 0.32141 |
| O132 | 0.06591 | 0.87308 | 0.09064 |
| O133 | 0.08345 | 0.00429 | 0.07635 |
| O134 | 0.10785 | 0.13502 | 0.06741 |
| O135 | 0.30218 | 0.86656 | 0.12541 |
| O136 | 0.31368 | 0.9953  | 0.07496 |
| O137 | 0.2963  | 0.12882 | 0.07326 |
| O138 | 0.51225 | 0.95531 | 0.29306 |
| O139 | 0.51515 | 0.13713 | 0.2788  |
| O140 | 0.64267 | 0.56591 | 0.27719 |
| O141 | 0.67537 | 0.56694 | 0.08313 |
| O142 | 0.79438 | 0.55278 | 0.99772 |
| O143 | 0.91446 | 0.56004 | 0.07979 |
| O144 | 0.88984 | 0.56522 | 0.27772 |
| O145 | 0.76612 | 0.5454  | 0.21972 |
| O146 | 0.64287 | 0.33105 | 0.25311 |
| O147 | 0.68799 | 0.34385 | 0.07211 |
| O148 | 0.80633 | 0.352   | 0.97934 |
| O149 | 0.91136 | 0.3316  | 0.09918 |
| O150 | 0.90229 | 0.33795 | 0.298   |
| O151 | 0.76994 | 0.3666  | 0.22412 |
| O152 | 0.67114 | 0.45227 | 0.18603 |
| O153 | 0.91703 | 0.44951 | 0.18914 |
| O154 | 0.56631 | 0.62987 | 0.40512 |
| O155 | 0.58183 | 0.49946 | 0.42925 |
| O156 | 0.59865 | 0.36658 | 0.43222 |
| O157 | 0.7934  | 0.62734 | 0.37276 |
| O158 | 0.80707 | 0.49409 | 0.38993 |
| O159 | 0.7945  | 0.36445 | 0.43261 |
| O160 | 0.01066 | 0.54457 | 0.21386 |
| O161 | 0.01774 | 0.36472 | 0.20861 |
| O162 | 0.87726 | 0.42499 | 0.7404  |
| O163 | 0.8169  | 0.44982 | 0.57457 |
| O164 | 0.69754 | 0.45059 | 0.48225 |
| O165 | 0.59194 | 0.43193 | 0.59983 |
| O166 | 0.602   | 0.43902 | 0.79785 |
| O167 | 0.72968 | 0.44909 | 0.74454 |
| O168 | 0.86134 | 0.6818  | 0.73917 |

|      |         |         |         |
|------|---------|---------|---------|
| O169 | 0.8081  | 0.64732 | 0.56621 |
| O170 | 0.68652 | 0.64599 | 0.48682 |
| O171 | 0.57718 | 0.66632 | 0.59482 |
| O172 | 0.60442 | 0.66229 | 0.78822 |
| O173 | 0.72996 | 0.65796 | 0.72261 |
| O174 | 0.82038 | 0.55813 | 0.7158  |
| O175 | 0.58257 | 0.54937 | 0.68846 |
| O176 | 0.92896 | 0.37215 | 0.91123 |
| O177 | 0.89692 | 0.5009  | 0.90337 |
| O178 | 0.88821 | 0.63334 | 0.92188 |
| O179 | 0.69173 | 0.3601  | 0.8783  |
| O180 | 0.68883 | 0.49053 | 0.92448 |
| O181 | 0.70099 | 0.62549 | 0.9115  |
| O182 | 0.48628 | 0.45834 | 0.71479 |
| O183 | 0.48251 | 0.63522 | 0.72355 |
| O184 | 0.64149 | 0.93066 | 0.28869 |
| O185 | 0.69637 | 0.92701 | 0.10944 |
| O186 | 0.80076 | 0.94874 | 0.98746 |
| O187 | 0.90208 | 0.92684 | 0.11264 |
| O188 | 0.89485 | 0.9488  | 0.30963 |
| O189 | 0.76868 | 0.96459 | 0.26344 |
| O190 | 0.64345 | 0.1674  | 0.26205 |
| O191 | 0.69933 | 0.15151 | 0.08745 |
| O192 | 0.81226 | 0.1432  | 0.98679 |
| O193 | 0.91911 | 0.16929 | 0.09703 |
| O194 | 0.89684 | 0.15593 | 0.29133 |
| O195 | 0.77013 | 0.1252  | 0.2533  |
| O196 | 0.67207 | 0.04474 | 0.1981  |
| O197 | 0.92023 | 0.04845 | 0.18018 |
| O198 | 0.56657 | 0.87599 | 0.42935 |
| O199 | 0.5888  | 0.00609 | 0.43617 |
| O200 | 0.59291 | 0.13892 | 0.44171 |
| O201 | 0.80534 | 0.86826 | 0.39126 |
| O202 | 0.81129 | 0.99586 | 0.44664 |
| O203 | 0.81731 | 0.13078 | 0.44168 |
| O204 | 0.0107  | 0.95382 | 0.22312 |
| O205 | 0.0179  | 0.13586 | 0.21736 |
| O206 | 0.85679 | 0.05403 | 0.78795 |
| O207 | 0.80219 | 0.06928 | 0.61083 |
| O208 | 0.70216 | 0.06768 | 0.47713 |
| O209 | 0.60229 | 0.07156 | 0.60902 |
| O210 | 0.60398 | 0.05279 | 0.80663 |
| O211 | 0.72887 | 0.02649 | 0.76371 |
| O212 | 0.85867 | 0.83118 | 0.76146 |

|      |         |          |         |
|------|---------|----------|---------|
| O213 | 0.80607 | 0.83254  | 0.58296 |
| O214 | 0.69096 | 0.85161  | 0.48885 |
| O215 | 0.58874 | 0.82688  | 0.61097 |
| O216 | 0.60513 | 0.84785  | 0.80458 |
| O217 | 0.72908 | 0.85571  | 0.74082 |
| O218 | 0.81912 | 0.94645  | 0.68327 |
| O219 | 0.58178 | 0.95092  | 0.68082 |
| O220 | 0.93249 | 0.12654  | 0.90911 |
| O221 | 0.91974 | 0.99595  | 0.94297 |
| O222 | 0.9006  | 0.86396  | 0.94236 |
| O223 | 0.69771 | 0.12586  | 0.89117 |
| O224 | 0.68191 | -0.00091 | 0.94581 |
| O225 | 0.70264 | 0.86659  | 0.93658 |
| O226 | 0.49063 | 0.04729  | 0.71446 |
| O227 | 0.48541 | 0.86445  | 0.72392 |
| O228 | 0.3575  | 0.43262  | 0.72214 |
| O229 | 0.30891 | 0.43288  | 0.9041  |
| O230 | 0.20385 | 0.45505  | 0.02453 |
| O231 | 0.10632 | 0.42995  | 0.89553 |
| O232 | 0.10802 | 0.45022  | 0.69783 |
| O233 | 0.23102 | 0.46529  | 0.753   |
| O234 | 0.35568 | 0.6709   | 0.74005 |
| O235 | 0.30303 | 0.65718  | 0.9171  |
| O236 | 0.18792 | 0.64739  | 0.01237 |
| O237 | 0.08369 | 0.67473  | 0.89753 |
| O238 | 0.10298 | 0.65656  | 0.70359 |
| O239 | 0.22858 | 0.63581  | 0.75525 |
| O240 | 0.32559 | 0.54957  | 0.80634 |
| O241 | 0.08239 | 0.5517   | 0.824   |
| O242 | 0.43227 | 0.37512  | 0.58357 |
| O243 | 0.40761 | 0.5052   | 0.57172 |
| O244 | 0.40331 | 0.63838  | 0.56171 |
| O245 | 0.19959 | 0.36964  | 0.62079 |
| O246 | 0.19491 | 0.49723  | 0.56611 |
| O247 | 0.19226 | 0.63201  | 0.56298 |
| O248 | 0.99622 | 0.45262  | 0.79005 |
| O249 | 0.98307 | 0.63623  | 0.78143 |
| O250 | 0.14169 | 0.56344  | 0.21276 |
| O251 | 0.18741 | 0.5631   | 0.39641 |
| O252 | 0.29959 | 0.56526  | 0.50296 |
| O253 | 0.4117  | 0.56911  | 0.39816 |
| O254 | 0.39557 | 0.56422  | 0.2023  |
| O255 | 0.27013 | 0.5373   | 0.24701 |
| O256 | 0.14046 | 0.32547  | 0.24951 |

|      |          |         |         |
|------|----------|---------|---------|
| O257 | 0.19169  | 0.34988 | 0.42595 |
| O258 | 0.31024  | 0.35449 | 0.51302 |
| O259 | 0.4155   | 0.33291 | 0.39694 |
| O260 | 0.39463  | 0.34098 | 0.20239 |
| O261 | 0.27029  | 0.35261 | 0.26669 |
| O262 | 0.1776   | 0.44818 | 0.29379 |
| O263 | 0.41701  | 0.45193 | 0.30723 |
| O264 | 0.06573  | 0.62558 | 0.08072 |
| O265 | 0.08118  | 0.49373 | 0.06558 |
| O266 | 0.11026  | 0.36312 | 0.06398 |
| O267 | 0.30086  | 0.62991 | 0.11099 |
| O268 | 0.32247  | 0.49959 | 0.07207 |
| O269 | 0.29772  | 0.36663 | 0.07206 |
| O270 | 0.51316  | 0.54372 | 0.2756  |
| O271 | 0.51548  | 0.36466 | 0.27546 |
| O272 | 0.44007  | 0.7508  | 0.64591 |
| O273 | 0.19593  | 0.74798 | 0.65552 |
| O274 | 0.27058  | 0.75022 | 0.04923 |
| O275 | 0.10736  | 0.75004 | 0.05583 |
| O276 | 0.0636   | 0.24939 | 0.13641 |
| O277 | 0.30486  | 0.24775 | 0.1536  |
| O278 | 0.22839  | 0.25129 | 0.54891 |
| O279 | 0.39214  | 0.25149 | 0.54919 |
| O280 | 0.56149  | 0.25164 | 0.35437 |
| O281 | 0.79975  | 0.24255 | 0.33806 |
| O282 | 0.72872  | 0.2451  | 0.95344 |
| O283 | 0.88988  | 0.24935 | 0.94712 |
| O284 | 0.9377   | 0.74933 | 0.86366 |
| O285 | 0.69252  | 0.75063 | 0.8534  |
| O286 | 0.76933  | 0.74673 | 0.44292 |
| O287 | 0.60676  | 0.75119 | 0.45082 |
| O288 | 0.95436  | 0.26306 | 0.44708 |
| O289 | 0.91869  | 0.20214 | 0.60073 |
| O290 | 0.86708  | 0.32004 | 0.56102 |
| O291 | -0.02133 | 0.31428 | 0.62515 |
| GA29 | 0.92269  | 0.40185 | 0.61087 |
| H293 | 0.93869  | 0.29426 | 0.39188 |
| H294 | 0.82296  | 0.33906 | 0.49023 |
| H295 | 0.89341  | 0.17261 | 0.55536 |
| H296 | 0.92804  | 0.46699 | 0.45583 |
| H297 | 0.01696  | 0.3805  | 0.42822 |
| H298 | 0.06846  | 0.41897 | 0.51898 |
| H299 | 0.04944  | 0.46191 | 0.40603 |
| H300 | -0.00031 | 0.5651  | 0.49037 |

|            |         |         |         |
|------------|---------|---------|---------|
| H301       | 0.02605 | 0.5305  | 0.60568 |
| H302       | 0.94152 | 0.55636 | 0.58981 |
| AL30       | 0.8153  | 0.32551 | 0.3133  |
| AL30       | 0.80468 | 0.47428 | 0.69878 |
| P305       | 0.93137 | 0.27462 | 0.55793 |
| C306       | 0.96823 | 0.46245 | 0.51175 |
| C307       | 0.02882 | 0.42857 | 0.46426 |
| C308       | 0.9842  | 0.53226 | 0.55268 |
| <b>TS3</b> |         |         |         |
| SI2        | 0.42379 | 0.05806 | 0.64801 |
| SI3        | 0.30573 | 0.02821 | 0.79432 |
| SI4        | 0.28016 | 0.05896 | 0.01516 |
| SI5        | 0.12091 | 0.06337 | 0.01449 |
| SI6        | 0.06707 | 0.02933 | 0.80286 |
| SI7        | 0.1798  | 0.0573  | 0.66189 |
| SI8        | 0.42038 | 0.82677 | 0.67399 |
| SI9        | 0.30421 | 0.8697  | 0.81298 |
| SI10       | 0.26633 | 0.82942 | 0.03194 |
| SI11       | 0.11182 | 0.82689 | 0.01808 |
| SI12       | 0.06486 | 0.87175 | 0.80384 |
| SI13       | 0.18222 | 0.82796 | 0.67651 |
| SI14       | 0.07586 | 0.9425  | 0.15349 |
| SI15       | 0.19505 | 0.97231 | 0.29727 |
| SI16       | 0.21796 | 0.93798 | 0.51919 |
| SI17       | 0.37788 | 0.93408 | 0.51698 |
| SI18       | 0.43179 | 0.96863 | 0.30654 |
| SI19       | 0.32002 | 0.94288 | 0.16247 |
| SI20       | 0.08163 | 0.17249 | 0.16863 |
| SI21       | 0.1953  | 0.13086 | 0.31316 |
| SI22       | 0.23274 | 0.17203 | 0.52979 |
| SI23       | 0.38709 | 0.17388 | 0.51164 |
| SI24       | 0.4353  | 0.1267  | 0.30055 |
| SI25       | 0.31618 | 0.16813 | 0.17458 |
| SI26       | 0.57729 | 0.55791 | 0.34946 |
| SI27       | 0.68973 | 0.5311  | 0.19467 |
| SI28       | 0.71532 | 0.55897 | 0.97904 |
| SI29       | 0.87427 | 0.56616 | 0.9827  |
| SI30       | 0.93103 | 0.53133 | 0.19162 |
| SI31       | 0.81397 | 0.55401 | 0.32594 |
| SI32       | 0.57837 | 0.32839 | 0.32975 |
| SI33       | 0.69337 | 0.37477 | 0.18716 |
| SI34       | 0.7289  | 0.32596 | 0.97286 |
| SI35       | 0.88323 | 0.32581 | 0.98761 |

|      |         |         |         |
|------|---------|---------|---------|
| SI36 | 0.93507 | 0.37315 | 0.19527 |
| SI37 | 0.92373 | 0.44109 | 0.85361 |
| SI38 | 0.77788 | 0.43807 | 0.48243 |
| SI39 | 0.61721 | 0.43434 | 0.48972 |
| SI40 | 0.56391 | 0.46911 | 0.70321 |
| SI41 | 0.67452 | 0.43764 | 0.84063 |
| SI42 | 0.91658 | 0.67569 | 0.82744 |
| SI43 | 0.80349 | 0.63629 | 0.68902 |
| SI44 | 0.76448 | 0.6668  | 0.47015 |
| SI45 | 0.60977 | 0.67229 | 0.48707 |
| SI46 | 0.56133 | 0.62704 | 0.70101 |
| SI47 | 0.68131 | 0.6736  | 0.82071 |
| SI48 | 0.57721 | 0.94239 | 0.36232 |
| SI49 | 0.69418 | 0.9674  | 0.21558 |
| SI50 | 0.72039 | 0.93564 | 0.99541 |
| SI51 | 0.87994 | 0.93386 | 0.99703 |
| SI52 | 0.93141 | 0.96882 | 0.20626 |
| SI53 | 0.81912 | 0.94438 | 0.35413 |
| SI54 | 0.57786 | 0.17291 | 0.33393 |
| SI55 | 0.69625 | 0.12307 | 0.19991 |
| SI56 | 0.73353 | 0.1674  | 0.98042 |
| SI57 | 0.88793 | 0.17215 | 0.98491 |
| SI58 | 0.93781 | 0.12585 | 0.19586 |
| SI59 | 0.81979 | 0.16556 | 0.32887 |
| SI60 | 0.92299 | 0.053   | 0.85691 |
| SI61 | 0.80122 | 0.02347 | 0.71168 |
| SI62 | 0.78199 | 0.06574 | 0.49342 |
| SI63 | 0.62132 | 0.07009 | 0.49219 |
| SI64 | 0.56917 | 0.03021 | 0.70271 |
| SI65 | 0.67853 | 0.05143 | 0.85319 |
| SI66 | 0.92085 | 0.82813 | 0.83801 |
| SI67 | 0.80201 | 0.86613 | 0.69292 |
| SI68 | 0.76754 | 0.82393 | 0.47692 |
| SI69 | 0.61327 | 0.82578 | 0.4959  |
| SI70 | 0.56482 | 0.8725  | 0.70542 |
| SI71 | 0.68142 | 0.82975 | 0.83441 |
| SI72 | 0.41996 | 0.44388 | 0.64564 |
| SI73 | 0.30346 | 0.47196 | 0.79306 |
| SI74 | 0.2823  | 0.43624 | 0.01426 |
| SI75 | 0.12415 | 0.43414 | 0.01102 |
| SI76 | 0.07138 | 0.47106 | 0.80185 |
| SI77 | 0.181   | 0.447   | 0.65453 |
| SI78 | 0.42013 | 0.67281 | 0.66702 |
| SI79 | 0.30159 | 0.62897 | 0.80459 |



|      |         |         |         |
|------|---------|---------|---------|
| SI80 | 0.26555 | 0.67159 | 0.02213 |
| SI81 | 0.11109 | 0.67375 | 0.01124 |
| SI82 | 0.06148 | 0.6293  | 0.80086 |
| SI83 | 0.17927 | 0.66922 | 0.67034 |
| SI84 | 0.07555 | 0.55524 | 0.14341 |
| SI85 | 0.19591 | 0.52744 | 0.28789 |
| SI86 | 0.21827 | 0.56565 | 0.50799 |
| SI87 | 0.37951 | 0.56844 | 0.50792 |
| SI88 | 0.43296 | 0.5308  | 0.29635 |
| SI89 | 0.32165 | 0.55537 | 0.15267 |
| SI90 | 0.08087 | 0.32633 | 0.16263 |
| SI91 | 0.19602 | 0.3687  | 0.30803 |
| SI92 | 0.23277 | 0.32962 | 0.52682 |
| SI93 | 0.38707 | 0.32779 | 0.51074 |
| SI94 | 0.43485 | 0.37266 | 0.29671 |
| SI95 | 0.3172  | 0.32683 | 0.17107 |
| O96  | 0.35893 | 0.06413 | 0.72023 |
| O97  | 0.31001 | 0.0645  | 0.90274 |
| O98  | 0.20007 | 0.04592 | 0.01278 |
| O99  | 0.09185 | 0.06907 | 0.9021  |
| O100 | 0.10422 | 0.05973 | 0.70518 |
| O101 | 0.23022 | 0.03619 | 0.75182 |
| O102 | 0.36027 | 0.82591 | 0.75517 |
| O103 | 0.30516 | 0.84783 | 0.9293  |
| O104 | 0.18878 | 0.8532  | 0.0227  |
| O105 | 0.08538 | 0.83112 | 0.90415 |
| O106 | 0.10473 | 0.8397  | 0.7091  |
| O107 | 0.23048 | 0.85507 | 0.76609 |
| O108 | 0.32333 | 0.94867 | 0.80236 |
| O109 | 0.08529 | 0.95017 | 0.81622 |
| O110 | 0.43217 | 0.12719 | 0.58452 |
| O111 | 0.41711 | 0.99572 | 0.57025 |
| O112 | 0.39622 | 0.86406 | 0.57231 |
| O113 | 0.19878 | 0.13146 | 0.6212  |
| O114 | 0.18285 | 0.00221 | 0.5724  |
| O115 | 0.1976  | 0.86787 | 0.57328 |
| O116 | 0.98737 | 0.03907 | 0.78631 |
| O117 | 0.98494 | 0.86454 | 0.78569 |
| O118 | 0.14171 | 0.93647 | 0.22349 |
| O119 | 0.19216 | 0.93451 | 0.4045  |
| O120 | 0.29829 | 0.94837 | 0.52407 |
| O121 | 0.40124 | 0.92801 | 0.40154 |
| O122 | 0.39592 | 0.94263 | 0.20487 |
| O123 | 0.27007 | 0.96567 | 0.2522  |

|      |         |         |         |
|------|---------|---------|---------|
| O124 | 0.14105 | 0.17386 | 0.25065 |
| O125 | 0.19218 | 0.15695 | 0.42744 |
| O126 | 0.30993 | 0.14794 | 0.51586 |
| O127 | 0.41392 | 0.17074 | 0.39757 |
| O128 | 0.39377 | 0.15295 | 0.20335 |
| O129 | 0.26979 | 0.1435  | 0.26791 |
| O130 | 0.1764  | 0.05152 | 0.30788 |
| O131 | 0.41798 | 0.04843 | 0.32261 |
| O132 | 0.06643 | 0.87294 | 0.0913  |
| O133 | 0.08197 | 0.00445 | 0.07488 |
| O134 | 0.10785 | 0.1352  | 0.06811 |
| O135 | 0.30163 | 0.86767 | 0.12479 |
| O136 | 0.31537 | 0.99537 | 0.06985 |
| O137 | 0.29613 | 0.12867 | 0.07297 |
| O138 | 0.51113 | 0.95451 | 0.29472 |
| O139 | 0.51468 | 0.13634 | 0.27915 |
| O140 | 0.64249 | 0.56569 | 0.27867 |
| O141 | 0.68197 | 0.57029 | 0.08887 |
| O142 | 0.79562 | 0.54858 | 0.99009 |
| O143 | 0.90654 | 0.57268 | 0.09375 |
| O144 | 0.89161 | 0.55752 | 0.29049 |
| O145 | 0.76736 | 0.53834 | 0.22984 |
| O146 | 0.64107 | 0.33169 | 0.25452 |
| O147 | 0.69044 | 0.34268 | 0.07601 |
| O148 | 0.80646 | 0.35196 | 0.97859 |
| O149 | 0.90749 | 0.32781 | 0.10329 |
| O150 | 0.9006  | 0.34611 | 0.29801 |
| O151 | 0.76705 | 0.37084 | 0.23414 |
| O152 | 0.66856 | 0.45284 | 0.18321 |
| O153 | 0.91723 | 0.45158 | 0.17468 |
| O154 | 0.5662  | 0.62824 | 0.40858 |
| O155 | 0.5851  | 0.49801 | 0.43134 |
| O156 | 0.59648 | 0.36476 | 0.43527 |
| O157 | 0.79427 | 0.625   | 0.37628 |
| O158 | 0.80801 | 0.49238 | 0.40535 |
| O159 | 0.80063 | 0.36131 | 0.44311 |
| O160 | 0.01002 | 0.5447  | 0.2134  |
| O161 | 0.01574 | 0.36521 | 0.20684 |
| O162 | 0.86663 | 0.43041 | 0.76853 |
| O163 | 0.81476 | 0.44544 | 0.58889 |
| O164 | 0.69806 | 0.443   | 0.48763 |
| O165 | 0.59056 | 0.43087 | 0.60335 |
| O166 | 0.59684 | 0.43831 | 0.80363 |
| O167 | 0.72139 | 0.45621 | 0.74792 |

|      |         |         |         |
|------|---------|---------|---------|
| O168 | 0.86021 | 0.68365 | 0.74129 |
| O169 | 0.80805 | 0.64841 | 0.56854 |
| O170 | 0.68675 | 0.64546 | 0.488   |
| O171 | 0.57809 | 0.66573 | 0.59756 |
| O172 | 0.60335 | 0.6613  | 0.79136 |
| O173 | 0.72865 | 0.66014 | 0.72381 |
| O174 | 0.81871 | 0.56013 | 0.71914 |
| O175 | 0.58147 | 0.54851 | 0.69124 |
| O176 | 0.93167 | 0.3739  | 0.92149 |
| O177 | 0.91193 | 0.50549 | 0.9246  |
| O178 | 0.8871  | 0.63641 | 0.92451 |
| O179 | 0.69074 | 0.36235 | 0.88148 |
| O180 | 0.683   | 0.49152 | 0.93195 |
| O181 | 0.70158 | 0.6253  | 0.91277 |
| O182 | 0.48393 | 0.45852 | 0.71571 |
| O183 | 0.48169 | 0.63499 | 0.72354 |
| O184 | 0.64064 | 0.93123 | 0.28878 |
| O185 | 0.69645 | 0.92709 | 0.11035 |
| O186 | 0.80043 | 0.94856 | 0.98758 |
| O187 | 0.90137 | 0.9256  | 0.11329 |
| O188 | 0.89454 | 0.94861 | 0.30998 |
| O189 | 0.76802 | 0.96474 | 0.26509 |
| O190 | 0.64273 | 0.16743 | 0.26218 |
| O191 | 0.69845 | 0.15252 | 0.08725 |
| O192 | 0.81149 | 0.14427 | 0.98676 |
| O193 | 0.91886 | 0.16853 | 0.09652 |
| O194 | 0.89617 | 0.15357 | 0.29072 |
| O195 | 0.76938 | 0.12603 | 0.25268 |
| O196 | 0.67198 | 0.04505 | 0.19759 |
| O197 | 0.91975 | 0.04734 | 0.17844 |
| O198 | 0.56655 | 0.87525 | 0.42953 |
| O199 | 0.58802 | 0.00561 | 0.43729 |
| O200 | 0.59262 | 0.13841 | 0.44196 |
| O201 | 0.80536 | 0.86828 | 0.39249 |
| O202 | 0.8116  | 0.9963  | 0.4473  |
| O203 | 0.81575 | 0.13152 | 0.44111 |
| O204 | 0.01037 | 0.95333 | 0.22293 |
| O205 | 0.0174  | 0.13448 | 0.21697 |
| O206 | 0.85672 | 0.05259 | 0.78783 |
| O207 | 0.80182 | 0.06961 | 0.61119 |
| O208 | 0.70172 | 0.06693 | 0.47774 |
| O209 | 0.60199 | 0.07139 | 0.60976 |
| O210 | 0.60352 | 0.05245 | 0.80745 |
| O211 | 0.72845 | 0.02687 | 0.76445 |

|      |         |          |         |
|------|---------|----------|---------|
| O212 | 0.85865 | 0.83206  | 0.7617  |
| O213 | 0.80536 | 0.83125  | 0.58373 |
| O214 | 0.69081 | 0.85056  | 0.48858 |
| O215 | 0.58878 | 0.82667  | 0.61145 |
| O216 | 0.60435 | 0.8478   | 0.80517 |
| O217 | 0.72863 | 0.85422  | 0.74197 |
| O218 | 0.81703 | 0.94607  | 0.68211 |
| O219 | 0.58135 | 0.95069  | 0.68129 |
| O220 | 0.93148 | 0.12648  | 0.90843 |
| O221 | 0.9194  | 0.99612  | 0.94445 |
| O222 | 0.90066 | 0.86418  | 0.94246 |
| O223 | 0.69702 | 0.12633  | 0.89128 |
| O224 | 0.68179 | -0.00028 | 0.94703 |
| O225 | 0.70164 | 0.86718  | 0.9372  |
| O226 | 0.49026 | 0.04701  | 0.71497 |
| O227 | 0.48491 | 0.86392  | 0.72322 |
| O228 | 0.3545  | 0.43601  | 0.71617 |
| O229 | 0.30454 | 0.43138  | 0.89804 |
| O230 | 0.20274 | 0.45152  | 0.02534 |
| O231 | 0.10572 | 0.43023  | 0.89328 |
| O232 | 0.10458 | 0.44928  | 0.6957  |
| O233 | 0.22859 | 0.46908  | 0.7467  |
| O234 | 0.35459 | 0.67026  | 0.73777 |
| O235 | 0.30268 | 0.66055  | 0.91584 |
| O236 | 0.18813 | 0.64746  | 0.01201 |
| O237 | 0.08333 | 0.67336  | 0.89745 |
| O238 | 0.10173 | 0.65658  | 0.70297 |
| O239 | 0.22726 | 0.63616  | 0.75591 |
| O240 | 0.32347 | 0.55033  | 0.80931 |
| O241 | 0.08057 | 0.55105  | 0.82115 |
| O242 | 0.4317  | 0.37445  | 0.58425 |
| O243 | 0.41148 | 0.50456  | 0.56563 |
| O244 | 0.40338 | 0.63774  | 0.56037 |
| O245 | 0.1975  | 0.37171  | 0.61622 |
| O246 | 0.18755 | 0.49889  | 0.56128 |
| O247 | 0.19212 | 0.63334  | 0.56297 |
| O248 | 0.99307 | 0.45159  | 0.79168 |
| O249 | 0.98164 | 0.63636  | 0.78187 |
| O250 | 0.14144 | 0.56058  | 0.2132  |
| O251 | 0.19159 | 0.56725  | 0.39361 |
| O252 | 0.29887 | 0.56181  | 0.51203 |
| O253 | 0.4056  | 0.5707   | 0.39385 |
| O254 | 0.39647 | 0.56055  | 0.1977  |
| O255 | 0.2705  | 0.53447  | 0.24208 |

|      |         |         |         |
|------|---------|---------|---------|
| O256 | 0.13907 | 0.32857 | 0.24668 |
| O257 | 0.19314 | 0.34293 | 0.42275 |
| O258 | 0.30985 | 0.35411 | 0.51376 |
| O259 | 0.41429 | 0.33185 | 0.39711 |
| O260 | 0.39444 | 0.34121 | 0.20207 |
| O261 | 0.26952 | 0.35418 | 0.26132 |
| O262 | 0.17885 | 0.44843 | 0.30407 |
| O263 | 0.4158  | 0.45144 | 0.31013 |
| O264 | 0.0664  | 0.62462 | 0.08105 |
| O265 | 0.08069 | 0.49276 | 0.06513 |
| O266 | 0.10656 | 0.36173 | 0.06015 |
| O267 | 0.30178 | 0.62812 | 0.10832 |
| O268 | 0.32188 | 0.49834 | 0.06579 |
| O269 | 0.29996 | 0.36513 | 0.06713 |
| O270 | 0.51237 | 0.54263 | 0.28074 |
| O271 | 0.51441 | 0.36467 | 0.27696 |
| O272 | 0.43959 | 0.75027 | 0.64475 |
| O273 | 0.19506 | 0.74854 | 0.6574  |
| O274 | 0.27023 | 0.74967 | 0.05432 |
| O275 | 0.10643 | 0.74945 | 0.05543 |
| O276 | 0.06221 | 0.24899 | 0.13823 |
| O277 | 0.30494 | 0.24744 | 0.15344 |
| O278 | 0.2292  | 0.25117 | 0.5569  |
| O279 | 0.3921  | 0.25097 | 0.55015 |
| O280 | 0.56025 | 0.25095 | 0.35465 |
| O281 | 0.80172 | 0.24343 | 0.33471 |
| O282 | 0.72775 | 0.24591 | 0.95227 |
| O283 | 0.89023 | 0.24944 | 0.94641 |
| O284 | 0.93881 | 0.75046 | 0.86301 |
| O285 | 0.69064 | 0.75058 | 0.85695 |
| O286 | 0.7696  | 0.74598 | 0.44208 |
| O287 | 0.60629 | 0.7502  | 0.45217 |
| O288 | 0.95679 | 0.25926 | 0.41408 |
| O289 | 0.94459 | 0.1982  | 0.57717 |
| O290 | 0.88577 | 0.31218 | 0.55397 |
| O291 | 1.01124 | 0.30483 | 0.57406 |
| GA29 | 0.92072 | 0.41045 | 0.61965 |
| H293 | 0.93778 | 0.2949  | 0.3671  |
| H294 | 0.83478 | 0.33601 | 0.49355 |
| H295 | 0.9074  | 0.17142 | 0.55059 |
| H296 | 0.94321 | 0.45055 | 0.43409 |
| H297 | 0.03528 | 0.37806 | 0.39192 |
| H298 | 0.02813 | 0.35583 | 0.52099 |
| H299 | 0.09125 | 0.42316 | 0.47948 |

|                                    |         |         |         |
|------------------------------------|---------|---------|---------|
| H300                               | 0.01362 | 0.5587  | 0.45181 |
| H301                               | 0.04448 | 0.5275  | 0.5676  |
| H302                               | 0.95755 | 0.54752 | 0.55257 |
| AL30                               | 0.81495 | 0.32751 | 0.31763 |
| AL30                               | 0.80041 | 0.47603 | 0.71146 |
| P305                               | 0.94945 | 0.27053 | 0.52926 |
| C306                               | 0.99031 | 0.45703 | 0.47519 |
| C307                               | 0.04032 | 0.40914 | 0.45919 |
| C308                               | 1.00185 | 0.52586 | 0.51626 |
| <b>C<sub>3</sub>H<sub>6</sub>*</b> |         |         |         |
| SI2                                | 0.42338 | 0.0582  | 0.64809 |
| SI3                                | 0.30567 | 0.02839 | 0.79436 |
| SI4                                | 0.27966 | 0.05822 | 0.01543 |
| SI5                                | 0.1206  | 0.06285 | 0.01452 |
| SI6                                | 0.06671 | 0.02947 | 0.80323 |
| SI7                                | 0.17962 | 0.05756 | 0.66254 |
| SI8                                | 0.42017 | 0.82683 | 0.67446 |
| SI9                                | 0.30418 | 0.86999 | 0.81294 |
| SI10                               | 0.26633 | 0.82949 | 0.03179 |
| SI11                               | 0.11182 | 0.82645 | 0.01851 |
| SI12                               | 0.06484 | 0.87206 | 0.80456 |
| SI13                               | 0.18202 | 0.82824 | 0.67663 |
| SI14                               | 0.07568 | 0.94218 | 0.15354 |
| SI15                               | 0.19486 | 0.97257 | 0.29734 |
| SI16                               | 0.21761 | 0.93841 | 0.51918 |
| SI17                               | 0.37754 | 0.934   | 0.51709 |
| SI18                               | 0.43176 | 0.96821 | 0.3066  |
| SI19                               | 0.31973 | 0.94234 | 0.16312 |
| SI20                               | 0.08157 | 0.17257 | 0.1685  |
| SI21                               | 0.19497 | 0.13143 | 0.3132  |
| SI22                               | 0.23255 | 0.17191 | 0.52989 |
| SI23                               | 0.38691 | 0.17381 | 0.51125 |
| SI24                               | 0.43487 | 0.12631 | 0.30008 |
| SI25                               | 0.31579 | 0.16822 | 0.17405 |
| SI26                               | 0.57888 | 0.55712 | 0.35048 |
| SI27                               | 0.69106 | 0.53118 | 0.19547 |
| SI28                               | 0.71704 | 0.55916 | 0.97862 |
| SI29                               | 0.87571 | 0.56709 | 0.98654 |
| SI30                               | 0.93023 | 0.531   | 0.19485 |
| SI31                               | 0.81421 | 0.55232 | 0.32988 |
| SI32                               | 0.57857 | 0.32861 | 0.33064 |
| SI33                               | 0.69478 | 0.37479 | 0.18988 |
| SI34                               | 0.72976 | 0.32668 | 0.97384 |

|      |         |         |         |
|------|---------|---------|---------|
| SI35 | 0.88397 | 0.32625 | 0.98982 |
| SI36 | 0.93533 | 0.3726  | 0.19672 |
| SI37 | 0.92466 | 0.44299 | 0.86115 |
| SI38 | 0.78056 | 0.4365  | 0.48882 |
| SI39 | 0.61944 | 0.43284 | 0.49174 |
| SI40 | 0.56368 | 0.46876 | 0.70373 |
| SI41 | 0.67544 | 0.43829 | 0.84016 |
| SI42 | 0.91678 | 0.67613 | 0.83015 |
| SI43 | 0.80311 | 0.63683 | 0.69125 |
| SI44 | 0.76454 | 0.6665  | 0.4721  |
| SI45 | 0.6098  | 0.6717  | 0.48884 |
| SI46 | 0.56112 | 0.62683 | 0.7024  |
| SI47 | 0.68112 | 0.6739  | 0.82258 |
| SI48 | 0.57691 | 0.94193 | 0.3621  |
| SI49 | 0.69352 | 0.96733 | 0.2146  |
| SI50 | 0.72004 | 0.9368  | 0.99493 |
| SI51 | 0.87936 | 0.93467 | 0.99674 |
| SI52 | 0.93142 | 0.96833 | 0.20595 |
| SI53 | 0.8183  | 0.94333 | 0.35213 |
| SI54 | 0.57713 | 0.17309 | 0.33284 |
| SI55 | 0.69502 | 0.1231  | 0.1982  |
| SI56 | 0.7333  | 0.16809 | 0.97936 |
| SI57 | 0.8879  | 0.17266 | 0.98409 |
| SI58 | 0.93784 | 0.12547 | 0.19503 |
| SI59 | 0.81908 | 0.16488 | 0.32671 |
| SI60 | 0.92243 | 0.05318 | 0.85593 |
| SI61 | 0.80056 | 0.02278 | 0.71095 |
| SI62 | 0.78052 | 0.06387 | 0.4924  |
| SI63 | 0.62019 | 0.07007 | 0.49121 |
| SI64 | 0.56881 | 0.03067 | 0.70214 |
| SI65 | 0.67826 | 0.05215 | 0.85242 |
| SI66 | 0.92055 | 0.82852 | 0.83739 |
| SI67 | 0.80205 | 0.86513 | 0.69136 |
| SI68 | 0.76709 | 0.82325 | 0.47539 |
| SI69 | 0.61299 | 0.82523 | 0.49572 |
| SI70 | 0.56464 | 0.87306 | 0.70493 |
| SI71 | 0.68133 | 0.83    | 0.83388 |
| SI72 | 0.42014 | 0.44344 | 0.64613 |
| SI73 | 0.3032  | 0.4712  | 0.79232 |
| SI74 | 0.28324 | 0.43693 | 0.01465 |
| SI75 | 0.12531 | 0.4344  | 0.01156 |
| SI76 | 0.0718  | 0.47176 | 0.80314 |
| SI77 | 0.17997 | 0.44659 | 0.65459 |
| SI78 | 0.42008 | 0.67295 | 0.66772 |

|      |         |         |         |
|------|---------|---------|---------|
| SI79 | 0.30101 | 0.62871 | 0.80361 |
| SI80 | 0.26613 | 0.67116 | 0.02215 |
| SI81 | 0.11161 | 0.67323 | 0.01173 |
| SI82 | 0.0617  | 0.6299  | 0.80095 |
| SI83 | 0.17873 | 0.6697  | 0.66978 |
| SI84 | 0.07533 | 0.55484 | 0.1441  |
| SI85 | 0.19631 | 0.52742 | 0.28789 |
| SI86 | 0.21844 | 0.56566 | 0.50873 |
| SI87 | 0.37967 | 0.56828 | 0.50914 |
| SI88 | 0.43323 | 0.53034 | 0.2979  |
| SI89 | 0.32271 | 0.55586 | 0.15316 |
| SI90 | 0.08138 | 0.32627 | 0.16109 |
| SI91 | 0.19643 | 0.36826 | 0.30676 |
| SI92 | 0.23248 | 0.32963 | 0.52606 |
| SI93 | 0.38685 | 0.32775 | 0.51088 |
| SI94 | 0.43471 | 0.37263 | 0.29712 |
| SI95 | 0.31795 | 0.32665 | 0.1702  |
| O96  | 0.35857 | 0.06489 | 0.72037 |
| O97  | 0.31018 | 0.06381 | 0.90338 |
| O98  | 0.19963 | 0.04485 | 0.01178 |
| O99  | 0.09103 | 0.06955 | 0.90248 |
| O100 | 0.104   | 0.06009 | 0.70568 |
| O101 | 0.23    | 0.03682 | 0.75256 |
| O102 | 0.3604  | 0.82577 | 0.75623 |
| O103 | 0.30509 | 0.84961 | 0.9298  |
| O104 | 0.1887  | 0.85299 | 0.02292 |
| O105 | 0.0852  | 0.83116 | 0.90468 |
| O106 | 0.10462 | 0.84014 | 0.70963 |
| O107 | 0.2305  | 0.8549  | 0.76629 |
| O108 | 0.3233  | 0.94885 | 0.80034 |
| O109 | 0.0855  | 0.95049 | 0.81697 |
| O110 | 0.43194 | 0.12713 | 0.58411 |
| O111 | 0.41648 | 0.9957  | 0.57071 |
| O112 | 0.39531 | 0.8641  | 0.57305 |
| O113 | 0.19825 | 0.13189 | 0.62164 |
| O114 | 0.18298 | 0.00278 | 0.57282 |
| O115 | 0.19731 | 0.86851 | 0.57367 |
| O116 | 0.98707 | 0.03898 | 0.78595 |
| O117 | 0.98489 | 0.86546 | 0.78652 |
| O118 | 0.1417  | 0.93686 | 0.22323 |
| O119 | 0.19107 | 0.93522 | 0.40484 |
| O120 | 0.29795 | 0.94863 | 0.52268 |
| O121 | 0.40168 | 0.9277  | 0.40202 |
| O122 | 0.39567 | 0.94208 | 0.20523 |



|      |         |         |         |
|------|---------|---------|---------|
| O123 | 0.27004 | 0.96532 | 0.25315 |
| O124 | 0.14022 | 0.17445 | 0.2518  |
| O125 | 0.19137 | 0.15679 | 0.42803 |
| O126 | 0.3096  | 0.148   | 0.51564 |
| O127 | 0.41359 | 0.17044 | 0.39714 |
| O128 | 0.39315 | 0.15215 | 0.2029  |
| O129 | 0.26931 | 0.14536 | 0.2684  |
| O130 | 0.17676 | 0.052   | 0.30699 |
| O131 | 0.41793 | 0.04803 | 0.32263 |
| O132 | 0.06643 | 0.87241 | 0.09197 |
| O133 | 0.08134 | 0.00398 | 0.0745  |
| O134 | 0.10857 | 0.13452 | 0.06913 |
| O135 | 0.30121 | 0.86715 | 0.12561 |
| O136 | 0.31491 | 0.99488 | 0.07059 |
| O137 | 0.29479 | 0.12799 | 0.07356 |
| O138 | 0.51104 | 0.95403 | 0.29402 |
| O139 | 0.51411 | 0.13633 | 0.278   |
| O140 | 0.64244 | 0.56678 | 0.27692 |
| O141 | 0.68492 | 0.57001 | 0.0893  |
| O142 | 0.79735 | 0.54719 | 0.98662 |
| O143 | 0.90322 | 0.57426 | 0.10032 |
| O144 | 0.89208 | 0.55581 | 0.29556 |
| O145 | 0.76824 | 0.5378  | 0.23263 |
| O146 | 0.64114 | 0.33187 | 0.25522 |
| O147 | 0.69328 | 0.34238 | 0.07893 |
| O148 | 0.80739 | 0.35218 | 0.97809 |
| O149 | 0.9054  | 0.32661 | 0.10693 |
| O150 | 0.90313 | 0.34385 | 0.30057 |
| O151 | 0.76773 | 0.37062 | 0.23957 |
| O152 | 0.66991 | 0.4528  | 0.18467 |
| O153 | 0.91663 | 0.45104 | 0.17714 |
| O154 | 0.56664 | 0.62687 | 0.41078 |
| O155 | 0.59074 | 0.49717 | 0.43098 |
| O156 | 0.59718 | 0.36379 | 0.43669 |
| O157 | 0.79455 | 0.62337 | 0.37995 |
| O158 | 0.80681 | 0.49031 | 0.4079  |
| O159 | 0.80376 | 0.35972 | 0.44717 |
| O160 | 0.00948 | 0.54473 | 0.21309 |
| O161 | 0.01613 | 0.36525 | 0.20368 |
| O162 | 0.86531 | 0.4335  | 0.78209 |
| O163 | 0.8192  | 0.44462 | 0.59264 |
| O164 | 0.70039 | 0.43795 | 0.49505 |
| O165 | 0.5894  | 0.43048 | 0.60352 |
| O166 | 0.59753 | 0.43844 | 0.8036  |

|      |         |         |         |
|------|---------|---------|---------|
| O167 | 0.72253 | 0.45567 | 0.74743 |
| O168 | 0.85966 | 0.68366 | 0.74529 |
| O169 | 0.80822 | 0.6506  | 0.57113 |
| O170 | 0.68682 | 0.64516 | 0.49026 |
| O171 | 0.57807 | 0.66619 | 0.59948 |
| O172 | 0.60335 | 0.65974 | 0.79362 |
| O173 | 0.72836 | 0.66182 | 0.72531 |
| O174 | 0.81753 | 0.56058 | 0.72005 |
| O175 | 0.58041 | 0.54825 | 0.69072 |
| O176 | 0.93412 | 0.37539 | 0.92862 |
| O177 | 0.91852 | 0.50768 | 0.93375 |
| O178 | 0.88868 | 0.63758 | 0.9288  |
| O179 | 0.69065 | 0.36347 | 0.88402 |
| O180 | 0.68291 | 0.49301 | 0.93068 |
| O181 | 0.70329 | 0.6266  | 0.91475 |
| O182 | 0.4837  | 0.45757 | 0.71721 |
| O183 | 0.4815  | 0.63549 | 0.72505 |
| O184 | 0.64073 | 0.93134 | 0.28913 |
| O185 | 0.6948  | 0.92725 | 0.10919 |
| O186 | 0.8     | 0.95073 | 0.98987 |
| O187 | 0.90202 | 0.92531 | 0.11236 |
| O188 | 0.89402 | 0.94802 | 0.30927 |
| O189 | 0.76785 | 0.96475 | 0.2627  |
| O190 | 0.64198 | 0.16764 | 0.26092 |
| O191 | 0.69753 | 0.15215 | 0.08551 |
| O192 | 0.8113  | 0.14525 | 0.98667 |
| O193 | 0.91904 | 0.16775 | 0.09553 |
| O194 | 0.89576 | 0.15331 | 0.28983 |
| O195 | 0.7684  | 0.12642 | 0.25082 |
| O196 | 0.67116 | 0.04503 | 0.19715 |
| O197 | 0.91979 | 0.04694 | 0.17862 |
| O198 | 0.5664  | 0.8746  | 0.42884 |
| O199 | 0.58689 | 0.00524 | 0.43734 |
| O200 | 0.59173 | 0.13832 | 0.44075 |
| O201 | 0.80414 | 0.8672  | 0.38954 |
| O202 | 0.81003 | 0.99472 | 0.44603 |
| O203 | 0.81574 | 0.12939 | 0.43918 |
| O204 | 0.01032 | 0.953   | 0.22334 |
| O205 | 0.01723 | 0.1346  | 0.21678 |
| O206 | 0.85631 | 0.05206 | 0.78649 |
| O207 | 0.80037 | 0.06831 | 0.60972 |
| O208 | 0.70063 | 0.06697 | 0.47539 |
| O209 | 0.60149 | 0.07187 | 0.60897 |
| O210 | 0.60323 | 0.05313 | 0.80671 |

|      |         |         |         |
|------|---------|---------|---------|
| O211 | 0.7279  | 0.02672 | 0.76386 |
| O212 | 0.8595  | 0.83137 | 0.7589  |
| O213 | 0.80574 | 0.83148 | 0.58135 |
| O214 | 0.69049 | 0.85005 | 0.48814 |
| O215 | 0.58853 | 0.82698 | 0.61126 |
| O216 | 0.60453 | 0.8493  | 0.80478 |
| O217 | 0.72888 | 0.85185 | 0.74033 |
| O218 | 0.81607 | 0.94536 | 0.6819  |
| O219 | 0.58096 | 0.95124 | 0.68021 |
| O220 | 0.93057 | 0.12703 | 0.90641 |
| O221 | 0.91901 | 0.9969  | 0.94437 |
| O222 | 0.89832 | 0.8652  | 0.94046 |
| O223 | 0.69737 | 0.12713 | 0.88947 |
| O224 | 0.68135 | 0.00095 | 0.94687 |
| O225 | 0.70288 | 0.86866 | 0.93507 |
| O226 | 0.48989 | 0.04728 | 0.71493 |
| O227 | 0.48476 | 0.86433 | 0.72299 |
| O228 | 0.3542  | 0.435   | 0.71561 |
| O229 | 0.30528 | 0.43204 | 0.89838 |
| O230 | 0.20377 | 0.45238 | 0.02643 |
| O231 | 0.10752 | 0.43124 | 0.89359 |
| O232 | 0.10356 | 0.44865 | 0.69624 |
| O233 | 0.2281  | 0.46636 | 0.74716 |
| O234 | 0.35411 | 0.67053 | 0.73766 |
| O235 | 0.30253 | 0.65888 | 0.91565 |
| O236 | 0.18866 | 0.64691 | 0.01393 |
| O237 | 0.08465 | 0.6735  | 0.89754 |
| O238 | 0.10115 | 0.65755 | 0.70251 |
| O239 | 0.22655 | 0.63682 | 0.75577 |
| O240 | 0.32251 | 0.54994 | 0.8059  |
| O241 | 0.08157 | 0.55174 | 0.82035 |
| O242 | 0.43187 | 0.37426 | 0.58388 |
| O243 | 0.412   | 0.50445 | 0.56659 |
| O244 | 0.40377 | 0.63763 | 0.56111 |
| O245 | 0.19491 | 0.37127 | 0.61394 |
| O246 | 0.18752 | 0.49935 | 0.56295 |
| O247 | 0.19198 | 0.63365 | 0.56264 |
| O248 | 0.99346 | 0.4521  | 0.79584 |
| O249 | 0.98173 | 0.63689 | 0.78389 |
| O250 | 0.14102 | 0.56044 | 0.21443 |
| O251 | 0.19246 | 0.56661 | 0.39409 |
| O252 | 0.29904 | 0.56161 | 0.51413 |
| O253 | 0.40527 | 0.57038 | 0.39485 |
| O254 | 0.39746 | 0.5606  | 0.1989  |

|      |         |         |         |
|------|---------|---------|---------|
| O255 | 0.27074 | 0.53536 | 0.24158 |
| O256 | 0.1392  | 0.3283  | 0.24581 |
| O257 | 0.19341 | 0.34179 | 0.42134 |
| O258 | 0.30952 | 0.35413 | 0.51518 |
| O259 | 0.41331 | 0.33144 | 0.3969  |
| O260 | 0.39511 | 0.34087 | 0.20185 |
| O261 | 0.26995 | 0.35293 | 0.26071 |
| O262 | 0.18059 | 0.44806 | 0.303   |
| O263 | 0.41474 | 0.45114 | 0.31078 |
| O264 | 0.06655 | 0.62395 | 0.08071 |
| O265 | 0.08118 | 0.49204 | 0.06645 |
| O266 | 0.10828 | 0.3613  | 0.05902 |
| O267 | 0.30344 | 0.62877 | 0.10852 |
| O268 | 0.32314 | 0.49882 | 0.06619 |
| O269 | 0.30082 | 0.3656  | 0.06685 |
| O270 | 0.51298 | 0.54057 | 0.28441 |
| O271 | 0.51447 | 0.36543 | 0.27894 |
| O272 | 0.43946 | 0.75042 | 0.6451  |
| O273 | 0.1948  | 0.74897 | 0.65658 |
| O274 | 0.27089 | 0.74962 | 0.05226 |
| O275 | 0.10685 | 0.74902 | 0.05587 |
| O276 | 0.06249 | 0.24886 | 0.13682 |
| O277 | 0.30578 | 0.24738 | 0.15082 |
| O278 | 0.22796 | 0.25115 | 0.55685 |
| O279 | 0.39159 | 0.25082 | 0.55002 |
| O280 | 0.55967 | 0.25102 | 0.35389 |
| O281 | 0.80285 | 0.24277 | 0.33747 |
| O282 | 0.72758 | 0.24664 | 0.9523  |
| O283 | 0.89137 | 0.25016 | 0.94699 |
| O284 | 0.93917 | 0.75132 | 0.86415 |
| O285 | 0.68838 | 0.7511  | 0.85916 |
| O286 | 0.76892 | 0.74531 | 0.44097 |
| O287 | 0.60586 | 0.74947 | 0.45289 |
| O288 | 0.97126 | 0.26071 | 0.41004 |
| O289 | 0.92914 | 0.17355 | 0.53641 |
| O290 | 0.88868 | 0.29602 | 0.54911 |
| O291 | 0.00712 | 0.26209 | 0.59065 |
| GA29 | 0.93833 | 0.4027  | 0.62412 |
| H293 | 0.94549 | 0.29441 | 0.36611 |
| H294 | 0.83486 | 0.33239 | 0.49492 |
| H295 | 0.88659 | 0.15707 | 0.506   |
| H296 | 0.95571 | 0.46168 | 0.39378 |
| H297 | 0.03705 | 0.37082 | 0.40059 |
| H298 | 0.0496  | 0.26682 | 0.55574 |

|      |         |         |         |
|------|---------|---------|---------|
| H299 | 0.0904  | 0.42059 | 0.48651 |
| H300 | 0.01265 | 0.57457 | 0.43648 |
| H301 | 0.05214 | 0.53446 | 0.5404  |
| H302 | 0.96346 | 0.54574 | 0.53654 |
| AL30 | 0.81712 | 0.32702 | 0.32067 |
| AL30 | 0.80294 | 0.47537 | 0.71419 |
| P305 | 0.94504 | 0.24957 | 0.5189  |
| C306 | 1.00082 | 0.46777 | 0.43915 |
| C307 | 0.0446  | 0.41695 | 0.44291 |
| C308 | 0.00811 | 0.53364 | 0.4915  |

**b) structures involved in propene aromatization to benzene over P/Ga/ZSM-5 (states shown in Fig. 5)**

**2C<sub>3</sub>H<sub>6</sub>\***

|      |         |         |         |
|------|---------|---------|---------|
| SI2  | 0.42397 | 0.05648 | 0.64701 |
| SI3  | 0.30551 | 0.02673 | 0.7935  |
| SI4  | 0.27945 | 0.05782 | 0.01356 |
| SI5  | 0.12057 | 0.06201 | 0.01433 |
| SI6  | 0.06723 | 0.02811 | 0.80358 |
| SI7  | 0.17929 | 0.05546 | 0.66025 |
| SI8  | 0.42041 | 0.82601 | 0.67365 |
| SI9  | 0.30416 | 0.86835 | 0.81336 |
| SI10 | 0.26575 | 0.82813 | 0.03264 |
| SI11 | 0.11131 | 0.82516 | 0.01938 |
| SI12 | 0.06491 | 0.87095 | 0.80553 |
| SI13 | 0.18173 | 0.82759 | 0.67577 |
| SI14 | 0.07527 | 0.94178 | 0.15312 |
| SI15 | 0.19532 | 0.97256 | 0.29595 |
| SI16 | 0.21755 | 0.93722 | 0.51779 |
| SI17 | 0.37717 | 0.93289 | 0.51673 |
| SI18 | 0.43076 | 0.96737 | 0.30695 |
| SI19 | 0.32011 | 0.94299 | 0.16011 |
| SI20 | 0.08146 | 0.17166 | 0.16879 |
| SI21 | 0.19468 | 0.13084 | 0.31412 |
| SI22 | 0.23254 | 0.17137 | 0.53098 |
| SI23 | 0.38696 | 0.1731  | 0.51196 |
| SI24 | 0.43415 | 0.12506 | 0.30099 |
| SI25 | 0.31541 | 0.1667  | 0.17393 |
| SI26 | 0.57778 | 0.55544 | 0.35105 |
| SI27 | 0.68904 | 0.53037 | 0.19449 |
| SI28 | 0.71649 | 0.55825 | 0.97745 |
| SI29 | 0.87471 | 0.56592 | 0.98525 |
| SI30 | 0.92791 | 0.5268  | 0.19124 |
| SI31 | 0.81307 | 0.54973 | 0.33024 |

|      |         |         |         |
|------|---------|---------|---------|
| SI32 | 0.57768 | 0.32783 | 0.33049 |
| SI33 | 0.69396 | 0.37426 | 0.19033 |
| SI34 | 0.72957 | 0.3257  | 0.97399 |
| SI35 | 0.88349 | 0.32441 | 0.98933 |
| SI36 | 0.93371 | 0.37002 | 0.1943  |
| SI37 | 0.92538 | 0.44172 | 0.86282 |
| SI38 | 0.78041 | 0.43449 | 0.49184 |
| SI39 | 0.61957 | 0.43066 | 0.49234 |
| SI40 | 0.56304 | 0.46824 | 0.70312 |
| SI41 | 0.67462 | 0.4375  | 0.84015 |
| SI42 | 0.91616 | 0.67503 | 0.83001 |
| SI43 | 0.80351 | 0.63484 | 0.69066 |
| SI44 | 0.76613 | 0.665   | 0.47056 |
| SI45 | 0.61107 | 0.67038 | 0.48792 |
| SI46 | 0.56241 | 0.62606 | 0.70187 |
| SI47 | 0.68173 | 0.67284 | 0.82172 |
| SI48 | 0.57678 | 0.94127 | 0.36216 |
| SI49 | 0.69353 | 0.96661 | 0.21445 |
| SI50 | 0.72    | 0.93544 | 0.99456 |
| SI51 | 0.87946 | 0.93353 | 0.99675 |
| SI52 | 0.93106 | 0.96822 | 0.20613 |
| SI53 | 0.81845 | 0.94268 | 0.35296 |
| SI54 | 0.57639 | 0.17221 | 0.33235 |
| SI55 | 0.69459 | 0.12254 | 0.19755 |
| SI56 | 0.73311 | 0.16733 | 0.9787  |
| SI57 | 0.88782 | 0.17165 | 0.98216 |
| SI58 | 0.93747 | 0.12541 | 0.19386 |
| SI59 | 0.81854 | 0.16496 | 0.32569 |
| SI60 | 0.92261 | 0.05175 | 0.85517 |
| SI61 | 0.80075 | 0.02204 | 0.70957 |
| SI62 | 0.78086 | 0.06387 | 0.4918  |
| SI63 | 0.62058 | 0.06978 | 0.4906  |
| SI64 | 0.56952 | 0.02936 | 0.70119 |
| SI65 | 0.6786  | 0.05095 | 0.85194 |
| SI66 | 0.92064 | 0.8277  | 0.83788 |
| SI67 | 0.80208 | 0.8648  | 0.69115 |
| SI68 | 0.7682  | 0.82175 | 0.47552 |
| SI69 | 0.61379 | 0.82385 | 0.49473 |
| SI70 | 0.56522 | 0.87186 | 0.70359 |
| SI71 | 0.6814  | 0.82927 | 0.83314 |
| SI72 | 0.41982 | 0.4443  | 0.64495 |
| SI73 | 0.30152 | 0.47216 | 0.79131 |
| SI74 | 0.28388 | 0.43397 | 0.01179 |
| SI75 | 0.12617 | 0.4324  | 0.00963 |

|      |         |         |         |
|------|---------|---------|---------|
| SI76 | 0.07263 | 0.47033 | 0.80235 |
| SI77 | 0.17917 | 0.44713 | 0.6509  |
| SI78 | 0.42088 | 0.67175 | 0.66603 |
| SI79 | 0.30028 | 0.62902 | 0.80314 |
| SI80 | 0.26586 | 0.67129 | 0.02139 |
| SI81 | 0.11123 | 0.67181 | 0.01394 |
| SI82 | 0.06128 | 0.62862 | 0.80223 |
| SI83 | 0.17751 | 0.66906 | 0.66879 |
| SI84 | 0.07447 | 0.5519  | 0.14315 |
| SI85 | 0.19707 | 0.52609 | 0.28709 |
| SI86 | 0.21786 | 0.56603 | 0.50802 |
| SI87 | 0.37843 | 0.5681  | 0.50881 |
| SI88 | 0.43001 | 0.52843 | 0.29845 |
| SI89 | 0.32314 | 0.55344 | 0.14751 |
| SI90 | 0.08052 | 0.32577 | 0.15976 |
| SI91 | 0.19679 | 0.36724 | 0.30661 |
| SI92 | 0.2324  | 0.32825 | 0.52563 |
| SI93 | 0.38697 | 0.32675 | 0.51217 |
| SI94 | 0.434   | 0.37142 | 0.29845 |
| SI95 | 0.31855 | 0.32517 | 0.16897 |
| O96  | 0.35921 | 0.06189 | 0.71949 |
| O97  | 0.30794 | 0.06514 | 0.90051 |
| O98  | 0.1995  | 0.04332 | 0.01281 |
| O99  | 0.09191 | 0.06937 | 0.90171 |
| O100 | 0.10408 | 0.05771 | 0.70493 |
| O101 | 0.23053 | 0.0332  | 0.74825 |
| O102 | 0.36086 | 0.82532 | 0.75574 |
| O103 | 0.30403 | 0.84496 | 0.92897 |
| O104 | 0.18819 | 0.8519  | 0.02366 |
| O105 | 0.08493 | 0.82943 | 0.90529 |
| O106 | 0.10466 | 0.83966 | 0.71012 |
| O107 | 0.23097 | 0.85453 | 0.76418 |
| O108 | 0.32333 | 0.94753 | 0.80562 |
| O109 | 0.08586 | 0.94926 | 0.81944 |
| O110 | 0.43199 | 0.12586 | 0.58398 |
| O111 | 0.41749 | 0.99444 | 0.56857 |
| O112 | 0.39541 | 0.86288 | 0.57202 |
| O113 | 0.19753 | 0.1304  | 0.62126 |
| O114 | 0.18136 | 0.00191 | 0.5686  |
| O115 | 0.19603 | 0.8676  | 0.57212 |
| O116 | 0.98762 | 0.03736 | 0.78609 |
| O117 | 0.98502 | 0.86451 | 0.78681 |
| O118 | 0.14141 | 0.93724 | 0.22269 |
| O119 | 0.19418 | 0.93306 | 0.40196 |

|      |         |         |         |
|------|---------|---------|---------|
| O120 | 0.29775 | 0.94794 | 0.52616 |
| O121 | 0.39901 | 0.92614 | 0.4006  |
| O122 | 0.39562 | 0.94277 | 0.20395 |
| O123 | 0.26966 | 0.96778 | 0.2481  |
| O124 | 0.13971 | 0.17358 | 0.25271 |
| O125 | 0.1917  | 0.1575  | 0.42838 |
| O126 | 0.30958 | 0.14749 | 0.51703 |
| O127 | 0.41288 | 0.16998 | 0.39737 |
| O128 | 0.39258 | 0.15005 | 0.20316 |
| O129 | 0.26877 | 0.14373 | 0.26799 |
| O130 | 0.17615 | 0.05141 | 0.31024 |
| O131 | 0.41714 | 0.04702 | 0.32521 |
| O132 | 0.06616 | 0.8716  | 0.09256 |
| O133 | 0.08048 | 0.00313 | 0.07311 |
| O134 | 0.10874 | 0.13346 | 0.06968 |
| O135 | 0.3014  | 0.86752 | 0.1242  |
| O136 | 0.3166  | 0.99436 | 0.06584 |
| O137 | 0.29445 | 0.12713 | 0.07289 |
| O138 | 0.51007 | 0.95298 | 0.29584 |
| O139 | 0.51341 | 0.13457 | 0.27865 |
| O140 | 0.6387  | 0.56646 | 0.27301 |
| O141 | 0.68527 | 0.56951 | 0.08847 |
| O142 | 0.79667 | 0.54454 | 0.98323 |
| O143 | 0.90045 | 0.57293 | 0.10008 |
| O144 | 0.89055 | 0.54853 | 0.29404 |
| O145 | 0.76549 | 0.53642 | 0.23462 |
| O146 | 0.63998 | 0.33114 | 0.25468 |
| O147 | 0.69435 | 0.34044 | 0.08029 |
| O148 | 0.80724 | 0.35113 | 0.97697 |
| O149 | 0.90378 | 0.32178 | 0.10701 |
| O150 | 0.90222 | 0.34345 | 0.29974 |
| O151 | 0.76622 | 0.3715  | 0.24256 |
| O152 | 0.66811 | 0.45192 | 0.18259 |
| O153 | 0.91382 | 0.44745 | 0.16919 |
| O154 | 0.5663  | 0.62483 | 0.41275 |
| O155 | 0.59407 | 0.49533 | 0.42934 |
| O156 | 0.5969  | 0.36185 | 0.43709 |
| O157 | 0.79759 | 0.62251 | 0.37863 |
| O158 | 0.80331 | 0.4898  | 0.41098 |
| O159 | 0.80506 | 0.3586  | 0.44858 |
| O160 | 0.00747 | 0.53903 | 0.20841 |
| O161 | 0.01464 | 0.36395 | 0.20185 |
| O162 | 0.86591 | 0.43184 | 0.78417 |
| O163 | 0.82023 | 0.44271 | 0.59455 |



|      |         |         |         |
|------|---------|---------|---------|
| O164 | 0.70037 | 0.4333  | 0.50071 |
| O165 | 0.58699 | 0.42955 | 0.60246 |
| O166 | 0.59706 | 0.43672 | 0.80195 |
| O167 | 0.72305 | 0.4545  | 0.74885 |
| O168 | 0.85951 | 0.68255 | 0.74439 |
| O169 | 0.80843 | 0.64827 | 0.57051 |
| O170 | 0.68806 | 0.6438  | 0.48586 |
| O171 | 0.5812  | 0.66556 | 0.59981 |
| O172 | 0.60366 | 0.65895 | 0.79412 |
| O173 | 0.72841 | 0.6591  | 0.72434 |
| O174 | 0.81866 | 0.55889 | 0.72028 |
| O175 | 0.58149 | 0.54738 | 0.69056 |
| O176 | 0.93444 | 0.37475 | 0.93195 |
| O177 | 0.91941 | 0.50752 | 0.93334 |
| O178 | 0.88718 | 0.63688 | 0.92852 |
| O179 | 0.68958 | 0.36313 | 0.88573 |
| O180 | 0.68029 | 0.49318 | 0.9297  |
| O181 | 0.70382 | 0.62646 | 0.91489 |
| O182 | 0.48285 | 0.45885 | 0.71696 |
| O183 | 0.4826  | 0.63459 | 0.72288 |
| O184 | 0.63992 | 0.93085 | 0.28789 |
| O185 | 0.69549 | 0.92638 | 0.10921 |
| O186 | 0.80002 | 0.94871 | 0.98829 |
| O187 | 0.90142 | 0.9252  | 0.1128  |
| O188 | 0.89402 | 0.94783 | 0.30963 |
| O189 | 0.7674  | 0.96363 | 0.26406 |
| O190 | 0.64106 | 0.16667 | 0.26003 |
| O191 | 0.6973  | 0.15181 | 0.08499 |
| O192 | 0.81115 | 0.14447 | 0.98601 |
| O193 | 0.91974 | 0.16675 | 0.09309 |
| O194 | 0.89512 | 0.15488 | 0.2873  |
| O195 | 0.76783 | 0.126   | 0.25052 |
| O196 | 0.6714  | 0.04428 | 0.19612 |
| O197 | 0.9189  | 0.04684 | 0.17924 |
| O198 | 0.56715 | 0.87372 | 0.42875 |
| O199 | 0.5875  | 0.00474 | 0.43686 |
| O200 | 0.59156 | 0.13802 | 0.44058 |
| O201 | 0.80551 | 0.86645 | 0.3908  |
| O202 | 0.81006 | 0.99425 | 0.44656 |
| O203 | 0.81683 | 0.12875 | 0.43783 |
| O204 | 0.01005 | 0.95303 | 0.22304 |
| O205 | 0.01684 | 0.13386 | 0.21651 |
| O206 | 0.85692 | 0.05032 | 0.78508 |
| O207 | 0.8003  | 0.06857 | 0.6093  |

|      |         |          |         |
|------|---------|----------|---------|
| O208 | 0.70101 | 0.06746  | 0.47416 |
| O209 | 0.60222 | 0.07106  | 0.60851 |
| O210 | 0.6036  | 0.05166  | 0.80607 |
| O211 | 0.72841 | 0.02574  | 0.76349 |
| O212 | 0.85914 | 0.83186  | 0.76031 |
| O213 | 0.80593 | 0.82945  | 0.58232 |
| O214 | 0.69141 | 0.84828  | 0.48711 |
| O215 | 0.5894  | 0.82551  | 0.61037 |
| O216 | 0.60442 | 0.84781  | 0.80391 |
| O217 | 0.72879 | 0.85289  | 0.7404  |
| O218 | 0.81605 | 0.94487  | 0.67869 |
| O219 | 0.58197 | 0.94999  | 0.67888 |
| O220 | 0.93035 | 0.12592  | 0.90452 |
| O221 | 0.9188  | 0.99589  | 0.94411 |
| O222 | 0.89953 | 0.86384  | 0.94192 |
| O223 | 0.69722 | 0.12604  | 0.88912 |
| O224 | 0.68165 | -0.00022 | 0.94644 |
| O225 | 0.70181 | 0.86725  | 0.93546 |
| O226 | 0.49054 | 0.04572  | 0.71372 |
| O227 | 0.48522 | 0.86363  | 0.7211  |
| O228 | 0.35331 | 0.43859  | 0.7134  |
| O229 | 0.30188 | 0.42876  | 0.8939  |
| O230 | 0.20461 | 0.44815  | 0.02889 |
| O231 | 0.1109  | 0.42998  | 0.89082 |
| O232 | 0.10311 | 0.4481   | 0.69418 |
| O233 | 0.22752 | 0.46942  | 0.74199 |
| O234 | 0.35484 | 0.66759  | 0.73552 |
| O235 | 0.30003 | 0.66423  | 0.91206 |
| O236 | 0.18855 | 0.64593  | 0.01599 |
| O237 | 0.08418 | 0.67125  | 0.89979 |
| O238 | 0.10048 | 0.65761  | 0.70442 |
| O239 | 0.22665 | 0.63557  | 0.75231 |
| O240 | 0.32043 | 0.55013  | 0.81381 |
| O241 | 0.08152 | 0.55038  | 0.8198  |
| O242 | 0.43101 | 0.37385  | 0.58567 |
| O243 | 0.41309 | 0.50389  | 0.56249 |
| O244 | 0.40565 | 0.63715  | 0.55843 |
| O245 | 0.19494 | 0.37167  | 0.61157 |
| O246 | 0.18506 | 0.49893  | 0.55764 |
| O247 | 0.1885  | 0.6332   | 0.5609  |
| O248 | 0.99454 | 0.44942  | 0.7981  |
| O249 | 0.98128 | 0.63534  | 0.78532 |
| O250 | 0.13828 | 0.55635  | 0.21734 |
| O251 | 0.19767 | 0.56847  | 0.39084 |

|      |         |         |         |
|------|---------|---------|---------|
| O252 | 0.29812 | 0.56246 | 0.52307 |
| O253 | 0.39839 | 0.56967 | 0.3919  |
| O254 | 0.39711 | 0.55727 | 0.19632 |
| O255 | 0.26912 | 0.53312 | 0.23306 |
| O256 | 0.13843 | 0.33021 | 0.24403 |
| O257 | 0.19422 | 0.33723 | 0.41939 |
| O258 | 0.30948 | 0.35262 | 0.51474 |
| O259 | 0.41404 | 0.3299  | 0.39851 |
| O260 | 0.39537 | 0.33859 | 0.20314 |
| O261 | 0.26946 | 0.3528  | 0.25715 |
| O262 | 0.18291 | 0.44737 | 0.31005 |
| O263 | 0.41148 | 0.44928 | 0.31231 |
| O264 | 0.06653 | 0.62265 | 0.08369 |
| O265 | 0.08257 | 0.49134 | 0.06228 |
| O266 | 0.10625 | 0.35981 | 0.05629 |
| O267 | 0.30595 | 0.62669 | 0.10227 |
| O268 | 0.32444 | 0.49666 | 0.06008 |
| O269 | 0.30408 | 0.36326 | 0.06392 |
| O270 | 0.50999 | 0.53829 | 0.29002 |
| O271 | 0.51393 | 0.36619 | 0.28018 |
| O272 | 0.43951 | 0.74952 | 0.64475 |
| O273 | 0.1941  | 0.74828 | 0.65544 |
| O274 | 0.26985 | 0.74872 | 0.05746 |
| O275 | 0.10621 | 0.74785 | 0.05719 |
| O276 | 0.06268 | 0.24793 | 0.13708 |
| O277 | 0.30562 | 0.24589 | 0.15105 |
| O278 | 0.22779 | 0.25032 | 0.56011 |
| O279 | 0.39202 | 0.2499  | 0.55171 |
| O280 | 0.55814 | 0.25014 | 0.35211 |
| O281 | 0.80119 | 0.24256 | 0.33717 |
| O282 | 0.72725 | 0.2458  | 0.95102 |
| O283 | 0.89099 | 0.24898 | 0.94391 |
| O284 | 0.93876 | 0.75025 | 0.86344 |
| O285 | 0.68994 | 0.7503  | 0.85638 |
| O286 | 0.77105 | 0.74398 | 0.44043 |
| O287 | 0.60658 | 0.74812 | 0.45157 |
| O288 | 0.97169 | 0.25994 | 0.40665 |
| O289 | 0.93204 | 0.17173 | 0.53226 |
| O290 | 0.89107 | 0.29434 | 0.54864 |
| O291 | 0.0089  | 0.26196 | 0.58737 |
| GA29 | 0.94004 | 0.39973 | 0.62576 |
| H293 | 0.9457  | 0.29429 | 0.36428 |
| H294 | 0.83665 | 0.33135 | 0.49537 |
| H295 | 0.89005 | 0.15486 | 0.50071 |

|                                    |          |         |         |
|------------------------------------|----------|---------|---------|
| H296                               | 0.95467  | 0.46873 | 0.39952 |
| H297                               | 0.0361   | 0.37757 | 0.39275 |
| H298                               | 0.05244  | 0.24942 | 0.56048 |
| H299                               | 0.08827  | 0.41997 | 0.48791 |
| H300                               | 0.00902  | 0.5779  | 0.46523 |
| H301                               | 0.04878  | 0.52964 | 0.56052 |
| H302                               | 0.96003  | 0.54006 | 0.55755 |
| H303                               | 0.99374  | 0.77608 | 0.41535 |
| H304                               | 0.11401  | 0.7423  | 0.4549  |
| H305                               | 0.92458  | 0.68205 | 0.35765 |
| H306                               | 0.00087  | 0.63459 | 0.32269 |
| H307                               | 0.11085  | 0.7697  | 0.32958 |
| H308                               | 0.11192  | 0.68184 | 0.35674 |
| AL30                               | 0.81636  | 0.32681 | 0.32143 |
| AL31                               | 0.80375  | 0.47363 | 0.71589 |
| P311                               | 0.94699  | 0.24821 | 0.51601 |
| C312                               | -0.00095 | 0.471   | 0.44712 |
| C313                               | 0.04293  | 0.42018 | 0.44288 |
| C314                               | 0.0051   | 0.53218 | 0.51125 |
| C315                               | 0.01757  | 0.73081 | 0.38516 |
| C316                               | 0.97897  | 0.68021 | 0.35407 |
| C317                               | 0.09226  | 0.73076 | 0.38125 |
| <b>C<sub>6</sub>H<sub>13</sub></b> |          |         |         |
| SI2                                | 0.42615  | 0.0561  | 0.64477 |
| SI3                                | 0.30656  | 0.02563 | 0.78931 |
| SI4                                | 0.28176  | 0.05862 | 0.01051 |
| SI5                                | 0.12226  | 0.06192 | 0.0123  |
| SI6                                | 0.06996  | 0.0268  | 0.80023 |
| SI7                                | 0.18053  | 0.05406 | 0.65466 |
| SI8                                | 0.42163  | 0.82538 | 0.6715  |
| SI9                                | 0.30555  | 0.86766 | 0.81107 |
| SI10                               | 0.26729  | 0.82812 | 0.03043 |
| SI11                               | 0.11292  | 0.82496 | 0.0155  |
| SI12                               | 0.0665   | 0.86954 | 0.80091 |
| SI13                               | 0.18397  | 0.82669 | 0.67303 |
| SI14                               | 0.07672  | 0.94103 | 0.1503  |
| SI15                               | 0.19661  | 0.97177 | 0.293   |
| SI16                               | 0.21953  | 0.93611 | 0.51458 |
| SI17                               | 0.3787   | 0.93289 | 0.51505 |
| SI18                               | 0.43162  | 0.96774 | 0.30504 |
| SI19                               | 0.32155  | 0.94402 | 0.15648 |
| SI20                               | 0.08303  | 0.17159 | 0.16603 |
| SI21                               | 0.19685  | 0.12873 | 0.3101  |

|      |         |         |         |
|------|---------|---------|---------|
| SI22 | 0.23453 | 0.17063 | 0.52682 |
| SI23 | 0.38881 | 0.17268 | 0.51001 |
| SI24 | 0.43647 | 0.12545 | 0.29902 |
| SI25 | 0.31766 | 0.16579 | 0.17164 |
| SI26 | 0.5788  | 0.55564 | 0.34423 |
| SI27 | 0.6905  | 0.52964 | 0.18726 |
| SI28 | 0.7197  | 0.55681 | 0.97188 |
| SI29 | 0.87861 | 0.56274 | 0.97623 |
| SI30 | 0.93061 | 0.52644 | 0.18592 |
| SI31 | 0.81291 | 0.55034 | 0.32119 |
| SI32 | 0.58029 | 0.32724 | 0.32526 |
| SI33 | 0.6956  | 0.37332 | 0.18184 |
| SI34 | 0.73296 | 0.32546 | 0.96848 |
| SI35 | 0.88753 | 0.32405 | 0.9863  |
| SI36 | 0.93618 | 0.36901 | 0.19424 |
| SI37 | 0.92525 | 0.43852 | 0.85028 |
| SI38 | 0.77908 | 0.43431 | 0.48251 |
| SI39 | 0.61864 | 0.43196 | 0.48672 |
| SI40 | 0.5656  | 0.46642 | 0.70085 |
| SI41 | 0.67919 | 0.43731 | 0.8332  |
| SI42 | 0.91742 | 0.67517 | 0.82204 |
| SI43 | 0.80635 | 0.63326 | 0.68356 |
| SI44 | 0.7664  | 0.66418 | 0.46431 |
| SI45 | 0.61162 | 0.66961 | 0.48296 |
| SI46 | 0.56474 | 0.62464 | 0.69865 |
| SI47 | 0.68551 | 0.67137 | 0.81534 |
| SI48 | 0.57824 | 0.94106 | 0.35951 |
| SI49 | 0.69562 | 0.96569 | 0.2118  |
| SI50 | 0.72188 | 0.93312 | 0.99189 |
| SI51 | 0.88164 | 0.93349 | 0.99458 |
| SI52 | 0.93234 | 0.96837 | 0.20532 |
| SI53 | 0.82025 | 0.94253 | 0.35247 |
| SI54 | 0.57904 | 0.17134 | 0.33069 |
| SI55 | 0.69805 | 0.12168 | 0.1958  |
| SI56 | 0.73575 | 0.16718 | 0.9772  |
| SI57 | 0.89045 | 0.17083 | 0.97978 |
| SI58 | 0.93968 | 0.12603 | 0.19348 |
| SI59 | 0.82052 | 0.16618 | 0.32351 |
| SI60 | 0.92461 | 0.0513  | 0.85228 |
| SI61 | 0.80227 | 0.02215 | 0.70614 |
| SI62 | 0.78288 | 0.06495 | 0.48899 |
| SI63 | 0.62265 | 0.06936 | 0.48856 |
| SI64 | 0.57163 | 0.02835 | 0.69978 |
| SI65 | 0.68059 | 0.04993 | 0.85078 |

|      |         |         |         |
|------|---------|---------|---------|
| SI66 | 0.9223  | 0.82791 | 0.8358  |
| SI67 | 0.80271 | 0.8655  | 0.68959 |
| SI68 | 0.76957 | 0.82116 | 0.47521 |
| SI69 | 0.61499 | 0.82344 | 0.49296 |
| SI70 | 0.56628 | 0.87054 | 0.70245 |
| SI71 | 0.68284 | 0.828   | 0.83055 |
| SI72 | 0.42358 | 0.44437 | 0.64285 |
| SI73 | 0.30465 | 0.472   | 0.79171 |
| SI74 | 0.28565 | 0.4314  | 0.00754 |
| SI75 | 0.12623 | 0.43216 | 0.00619 |
| SI76 | 0.07036 | 0.46881 | 0.79556 |
| SI77 | 0.18392 | 0.44562 | 0.65188 |
| SI78 | 0.42439 | 0.67055 | 0.6629  |
| SI79 | 0.30383 | 0.62875 | 0.80346 |
| SI80 | 0.26857 | 0.67217 | 0.01707 |
| SI81 | 0.11359 | 0.67139 | 0.00868 |
| SI82 | 0.06221 | 0.62826 | 0.79651 |
| SI83 | 0.18274 | 0.66808 | 0.66909 |
| SI84 | 0.07777 | 0.55293 | 0.14434 |
| SI85 | 0.19998 | 0.52606 | 0.28755 |
| SI86 | 0.22693 | 0.564   | 0.50907 |
| SI87 | 0.38667 | 0.56683 | 0.50505 |
| SI88 | 0.43308 | 0.52832 | 0.29149 |
| SI89 | 0.32372 | 0.55206 | 0.1427  |
| SI90 | 0.08208 | 0.32607 | 0.15977 |
| SI91 | 0.19796 | 0.36782 | 0.30704 |
| SI92 | 0.23418 | 0.32748 | 0.5248  |
| SI93 | 0.38866 | 0.32661 | 0.51057 |
| SI94 | 0.43655 | 0.37056 | 0.29532 |
| SI95 | 0.31878 | 0.32452 | 0.16983 |
| O96  | 0.3611  | 0.06086 | 0.71685 |
| O97  | 0.30674 | 0.06486 | 0.89563 |
| O98  | 0.20161 | 0.04549 | 0.01563 |
| O99  | 0.09621 | 0.06743 | 0.89796 |
| O100 | 0.1058  | 0.05732 | 0.70141 |
| O101 | 0.23225 | 0.03062 | 0.74136 |
| O102 | 0.36152 | 0.82409 | 0.75276 |
| O103 | 0.3057  | 0.844   | 0.92656 |
| O104 | 0.18972 | 0.85176 | 0.01997 |
| O105 | 0.08623 | 0.82884 | 0.90153 |
| O106 | 0.10638 | 0.8375  | 0.70615 |
| O107 | 0.23206 | 0.85446 | 0.76226 |
| O108 | 0.32512 | 0.94672 | 0.80365 |
| O109 | 0.08795 | 0.94775 | 0.81403 |

|      |         |         |         |
|------|---------|---------|---------|
| O110 | 0.43395 | 0.12576 | 0.58246 |
| O111 | 0.41992 | 0.99418 | 0.56596 |
| O112 | 0.3971  | 0.86269 | 0.5699  |
| O113 | 0.19893 | 0.12886 | 0.61588 |
| O114 | 0.18106 | 0.00024 | 0.56326 |
| O115 | 0.19829 | 0.86639 | 0.56922 |
| O116 | 0.99027 | 0.03674 | 0.7847  |
| O117 | 0.98662 | 0.86307 | 0.78178 |
| O118 | 0.14254 | 0.93581 | 0.22052 |
| O119 | 0.19827 | 0.93088 | 0.39796 |
| O120 | 0.29937 | 0.94826 | 0.5267  |
| O121 | 0.39911 | 0.92656 | 0.39828 |
| O122 | 0.39663 | 0.94328 | 0.2018  |
| O123 | 0.27031 | 0.96986 | 0.24267 |
| O124 | 0.14369 | 0.17199 | 0.24595 |
| O125 | 0.1952  | 0.15778 | 0.42286 |
| O126 | 0.31166 | 0.14633 | 0.51449 |
| O127 | 0.41533 | 0.17011 | 0.39569 |
| O128 | 0.39518 | 0.15156 | 0.20153 |
| O129 | 0.27114 | 0.13745 | 0.2625  |
| O130 | 0.17553 | 0.04985 | 0.31034 |
| O131 | 0.41838 | 0.04748 | 0.32261 |
| O132 | 0.06756 | 0.87103 | 0.08893 |
| O133 | 0.08256 | 0.00249 | 0.07046 |
| O134 | 0.10666 | 0.13377 | 0.06432 |
| O135 | 0.30242 | 0.86843 | 0.12142 |
| O136 | 0.31937 | 0.9948  | 0.06129 |
| O137 | 0.29991 | 0.12818 | 0.06738 |
| O138 | 0.51082 | 0.95267 | 0.29476 |
| O139 | 0.51582 | 0.13399 | 0.27689 |
| O140 | 0.64192 | 0.56472 | 0.26941 |
| O141 | 0.68612 | 0.56916 | 0.08143 |
| O142 | 0.80002 | 0.54337 | 0.97936 |
| O143 | 0.9061  | 0.57036 | 0.09065 |
| O144 | 0.89151 | 0.54982 | 0.28712 |
| O145 | 0.76782 | 0.53712 | 0.22339 |
| O146 | 0.64259 | 0.33083 | 0.24935 |
| O147 | 0.69241 | 0.34134 | 0.0703  |
| O148 | 0.81077 | 0.34955 | 0.97981 |
| O149 | 0.91158 | 0.32179 | 0.1022  |
| O150 | 0.90174 | 0.34333 | 0.29741 |
| O151 | 0.76921 | 0.36894 | 0.22856 |
| O152 | 0.66993 | 0.45126 | 0.17636 |
| O153 | 0.91784 | 0.44683 | 0.16721 |

|      |         |         |         |
|------|---------|---------|---------|
| O154 | 0.56788 | 0.62584 | 0.40443 |
| O155 | 0.5887  | 0.49557 | 0.42475 |
| O156 | 0.59758 | 0.36249 | 0.4315  |
| O157 | 0.79711 | 0.62355 | 0.36956 |
| O158 | 0.80288 | 0.49147 | 0.402   |
| O159 | 0.80182 | 0.36057 | 0.44059 |
| O160 | 0.00968 | 0.541   | 0.20838 |
| O161 | 0.01725 | 0.36399 | 0.20587 |
| O162 | 0.862   | 0.42875 | 0.78101 |
| O163 | 0.81855 | 0.44791 | 0.58358 |
| O164 | 0.69863 | 0.4392  | 0.49177 |
| O165 | 0.58692 | 0.42918 | 0.5977  |
| O166 | 0.60085 | 0.43407 | 0.79808 |
| O167 | 0.72403 | 0.45963 | 0.74069 |
| O168 | 0.86111 | 0.68368 | 0.73583 |
| O169 | 0.8105  | 0.64537 | 0.56235 |
| O170 | 0.68876 | 0.64317 | 0.4814  |
| O171 | 0.58136 | 0.66259 | 0.59432 |
| O172 | 0.60723 | 0.65871 | 0.78856 |
| O173 | 0.73105 | 0.65676 | 0.71689 |
| O174 | 0.8257  | 0.55847 | 0.71409 |
| O175 | 0.58312 | 0.54591 | 0.68955 |
| O176 | 0.93694 | 0.37221 | 0.92174 |
| O177 | 0.92285 | 0.50465 | 0.92269 |
| O178 | 0.89073 | 0.6338  | 0.91881 |
| O179 | 0.69832 | 0.36277 | 0.8751  |
| O180 | 0.68395 | 0.49111 | 0.92559 |
| O181 | 0.70807 | 0.62469 | 0.90779 |
| O182 | 0.48545 | 0.45678 | 0.71785 |
| O183 | 0.48544 | 0.63477 | 0.72298 |
| O184 | 0.64051 | 0.93067 | 0.28361 |
| O185 | 0.69896 | 0.92464 | 0.10728 |
| O186 | 0.80196 | 0.9456  | 0.98248 |
| O187 | 0.90176 | 0.9266  | 0.11141 |
| O188 | 0.89575 | 0.94643 | 0.30841 |
| O189 | 0.76867 | 0.96231 | 0.26384 |
| O190 | 0.64419 | 0.16425 | 0.25986 |
| O191 | 0.70052 | 0.15319 | 0.08437 |
| O192 | 0.81386 | 0.14386 | 0.98403 |
| O193 | 0.92345 | 0.16485 | 0.08968 |
| O194 | 0.89754 | 0.15792 | 0.28509 |
| O195 | 0.77131 | 0.12423 | 0.24869 |
| O196 | 0.67479 | 0.0434  | 0.19102 |
| O197 | 0.92054 | 0.04737 | 0.1817  |



|      |         |         |         |
|------|---------|---------|---------|
| O198 | 0.56902 | 0.87362 | 0.42652 |
| O199 | 0.58992 | 0.00446 | 0.43385 |
| O200 | 0.59283 | 0.13765 | 0.4398  |
| O201 | 0.8075  | 0.86667 | 0.3923  |
| O202 | 0.81267 | 0.99524 | 0.44459 |
| O203 | 0.81871 | 0.12989 | 0.43569 |
| O204 | 0.01139 | 0.95228 | 0.21989 |
| O205 | 0.01909 | 0.13432 | 0.21651 |
| O206 | 0.8596  | 0.0489  | 0.78118 |
| O207 | 0.8015  | 0.06956 | 0.60697 |
| O208 | 0.70297 | 0.0675  | 0.47124 |
| O209 | 0.60469 | 0.06924 | 0.60665 |
| O210 | 0.60569 | 0.05114 | 0.80447 |
| O211 | 0.73063 | 0.02572 | 0.76198 |
| O212 | 0.85915 | 0.83429 | 0.76175 |
| O213 | 0.80691 | 0.8273  | 0.58275 |
| O214 | 0.69278 | 0.84761 | 0.48655 |
| O215 | 0.58988 | 0.82473 | 0.60826 |
| O216 | 0.60534 | 0.84496 | 0.80214 |
| O217 | 0.72919 | 0.85531 | 0.73879 |
| O218 | 0.81682 | 0.94516 | 0.67278 |
| O219 | 0.58364 | 0.94871 | 0.67919 |
| O220 | 0.93249 | 0.12636 | 0.89926 |
| O221 | 0.92007 | 0.99697 | 0.94309 |
| O222 | 0.9052  | 0.86432 | 0.94122 |
| O223 | 0.69917 | 0.12455 | 0.8897  |
| O224 | 0.68353 | 0.99742 | 0.9437  |
| O225 | 0.70233 | 0.86453 | 0.93453 |
| O226 | 0.49266 | 0.04519 | 0.71159 |
| O227 | 0.48616 | 0.86293 | 0.71991 |
| O228 | 0.35515 | 0.444   | 0.7076  |
| O229 | 0.3082  | 0.42521 | 0.89113 |
| O230 | 0.20581 | 0.44546 | 0.01696 |
| O231 | 0.10535 | 0.4301  | 0.88904 |
| O232 | 0.10669 | 0.44865 | 0.69025 |
| O233 | 0.22946 | 0.46792 | 0.7462  |
| O234 | 0.35675 | 0.66317 | 0.72848 |
| O235 | 0.30627 | 0.66771 | 0.90972 |
| O236 | 0.19135 | 0.64699 | 0.00524 |
| O237 | 0.08313 | 0.66934 | 0.89637 |
| O238 | 0.10487 | 0.65577 | 0.70069 |
| O239 | 0.22899 | 0.63595 | 0.75677 |
| O240 | 0.32098 | 0.54971 | 0.82027 |
| O241 | 0.07734 | 0.54908 | 0.81378 |

|      |         |         |         |
|------|---------|---------|---------|
| O242 | 0.43164 | 0.37242 | 0.58701 |
| O243 | 0.42242 | 0.5027  | 0.55739 |
| O244 | 0.41371 | 0.63623 | 0.55383 |
| O245 | 0.19889 | 0.36964 | 0.61443 |
| O246 | 0.19449 | 0.49638 | 0.55795 |
| O247 | 0.19824 | 0.6313  | 0.56304 |
| O248 | 0.99359 | 0.44493 | 0.78208 |
| O249 | 0.98332 | 0.63892 | 0.7723  |
| O250 | 0.13954 | 0.55862 | 0.22274 |
| O251 | 0.20619 | 0.56734 | 0.39197 |
| O252 | 0.30681 | 0.56044 | 0.52355 |
| O253 | 0.40337 | 0.56889 | 0.38713 |
| O254 | 0.39749 | 0.55692 | 0.19133 |
| O255 | 0.26995 | 0.53077 | 0.22805 |
| O256 | 0.14132 | 0.33027 | 0.24192 |
| O257 | 0.19454 | 0.33864 | 0.42012 |
| O258 | 0.31105 | 0.35218 | 0.51105 |
| O259 | 0.41745 | 0.3315  | 0.39797 |
| O260 | 0.3959  | 0.33668 | 0.20265 |
| O261 | 0.27109 | 0.35462 | 0.25817 |
| O262 | 0.18236 | 0.44793 | 0.31027 |
| O263 | 0.41565 | 0.44909 | 0.30609 |
| O264 | 0.0713  | 0.62283 | 0.08254 |
| O265 | 0.08728 | 0.4919  | 0.0649  |
| O266 | 0.106   | 0.36027 | 0.05509 |
| O267 | 0.30573 | 0.62525 | 0.09802 |
| O268 | 0.32467 | 0.49503 | 0.05598 |
| O269 | 0.30398 | 0.36166 | 0.06392 |
| O270 | 0.51243 | 0.54053 | 0.27832 |
| O271 | 0.51581 | 0.3636  | 0.27359 |
| O272 | 0.44075 | 0.74894 | 0.64284 |
| O273 | 0.19757 | 0.7474  | 0.65391 |
| O274 | 0.27157 | 0.74884 | 0.05711 |
| O275 | 0.10834 | 0.74734 | 0.05215 |
| O276 | 0.06448 | 0.24826 | 0.13616 |
| O277 | 0.30416 | 0.24519 | 0.15466 |
| O278 | 0.23045 | 0.24926 | 0.55739 |
| O279 | 0.39322 | 0.24956 | 0.54924 |
| O280 | 0.56155 | 0.24953 | 0.3485  |
| O281 | 0.80055 | 0.24299 | 0.33169 |
| O282 | 0.73103 | 0.24522 | 0.94678 |
| O283 | 0.89508 | 0.24811 | 0.94104 |
| O284 | 0.93862 | 0.74985 | 0.85989 |
| O285 | 0.6945  | 0.74891 | 0.84946 |

|                                          |         |         |         |
|------------------------------------------|---------|---------|---------|
| O286                                     | 0.7724  | 0.74373 | 0.43815 |
| O287                                     | 0.60769 | 0.7479  | 0.44928 |
| O288                                     | 0.96168 | 0.27069 | 0.43535 |
| O289                                     | 0.92522 | 0.17733 | 0.55373 |
| O290                                     | 0.86582 | 0.28975 | 0.56251 |
| O291                                     | 0.98618 | 0.27609 | 0.61956 |
| GA29                                     | 0.01749 | 0.26256 | 0.76008 |
| H293                                     | 0.93775 | 0.29882 | 0.38266 |
| H294                                     | 0.83895 | 0.31982 | 0.51156 |
| H295                                     | 0.88754 | 0.15852 | 0.51439 |
| H296                                     | 0.97079 | 0.59174 | 0.58398 |
| H297                                     | 0.08098 | 0.53762 | 0.55739 |
| H298                                     | 0.0839  | 0.62009 | 0.50737 |
| H299                                     | 0.07592 | 0.55065 | 0.42574 |
| H300                                     | 0.97695 | 0.62833 | 0.36442 |
| H301                                     | 0.98602 | 0.6827  | 0.47034 |
| H302                                     | 0.90745 | 0.64389 | 0.44444 |
| H303                                     | 0.92218 | 0.42127 | 0.45278 |
| H304                                     | 0.03778 | 0.43202 | 0.37211 |
| H305                                     | 0.8925  | 0.52421 | 0.51147 |
| H306                                     | 0.95369 | 0.43047 | 0.56841 |
| H307                                     | 0.03276 | 0.36627 | 0.46071 |
| H308                                     | 0.07446 | 0.44155 | 0.49226 |
| AL30                                     | 0.81468 | 0.32816 | 0.31917 |
| AL31                                     | 0.80616 | 0.47294 | 0.70634 |
| P311                                     | 0.93381 | 0.2557  | 0.54237 |
| C312                                     | 0.98631 | 0.57703 | 0.5058  |
| C313                                     | 0.06122 | 0.57043 | 0.49895 |
| C314                                     | 0.96151 | 0.63729 | 0.44191 |
| C315                                     | 0.96479 | 0.4471  | 0.48938 |
| C316                                     | 0.94615 | 0.51693 | 0.49844 |
| C317                                     | 0.03168 | 0.42102 | 0.45198 |
| <b>C<sub>6</sub>H<sub>12</sub>+Ga(H)</b> |         |         |         |
| SI2                                      | 0.42612 | 0.055   | 0.6446  |
| SI3                                      | 0.30634 | 0.02498 | 0.78902 |
| SI4                                      | 0.28162 | 0.05909 | 0.00972 |
| SI5                                      | 0.1223  | 0.06172 | 0.01204 |
| SI6                                      | 0.07035 | 0.02579 | 0.79994 |
| SI7                                      | 0.18077 | 0.05261 | 0.65307 |
| SI8                                      | 0.42197 | 0.8248  | 0.67079 |
| SI9                                      | 0.30566 | 0.86768 | 0.81077 |
| SI10                                     | 0.26793 | 0.82781 | 0.02988 |
| SI11                                     | 0.11361 | 0.82465 | 0.01601 |

|      |         |         |         |
|------|---------|---------|---------|
| SI12 | 0.06652 | 0.86832 | 0.80186 |
| SI13 | 0.18413 | 0.8269  | 0.67313 |
| SI14 | 0.07714 | 0.94094 | 0.15017 |
| SI15 | 0.19756 | 0.97128 | 0.2923  |
| SI16 | 0.22013 | 0.93504 | 0.51329 |
| SI17 | 0.37948 | 0.93164 | 0.51413 |
| SI18 | 0.43173 | 0.968   | 0.30403 |
| SI19 | 0.32215 | 0.94467 | 0.15438 |
| SI20 | 0.08269 | 0.17071 | 0.16594 |
| SI21 | 0.19696 | 0.12815 | 0.3105  |
| SI22 | 0.23427 | 0.17022 | 0.52745 |
| SI23 | 0.38853 | 0.1721  | 0.51095 |
| SI24 | 0.4361  | 0.12582 | 0.29971 |
| SI25 | 0.31762 | 0.16572 | 0.17136 |
| SI26 | 0.57838 | 0.5544  | 0.34838 |
| SI27 | 0.68635 | 0.52845 | 0.18939 |
| SI28 | 0.71491 | 0.55758 | 0.97599 |
| SI29 | 0.87337 | 0.56315 | 0.97804 |
| SI30 | 0.93114 | 0.52682 | 0.18607 |
| SI31 | 0.81068 | 0.55018 | 0.31894 |
| SI32 | 0.58115 | 0.32675 | 0.32838 |
| SI33 | 0.69399 | 0.37259 | 0.18389 |
| SI34 | 0.7314  | 0.32359 | 0.97041 |
| SI35 | 0.88545 | 0.3228  | 0.98342 |
| SI36 | 0.93655 | 0.3689  | 0.19266 |
| SI37 | 0.92702 | 0.43813 | 0.84782 |
| SI38 | 0.78017 | 0.43125 | 0.47776 |
| SI39 | 0.62176 | 0.43141 | 0.49117 |
| SI40 | 0.56496 | 0.46662 | 0.70162 |
| SI41 | 0.67898 | 0.43427 | 0.83539 |
| SI42 | 0.91826 | 0.67287 | 0.82267 |
| SI43 | 0.80535 | 0.63333 | 0.68248 |
| SI44 | 0.76342 | 0.66429 | 0.46332 |
| SI45 | 0.60874 | 0.66976 | 0.48337 |
| SI46 | 0.56314 | 0.62448 | 0.69877 |
| SI47 | 0.68355 | 0.67159 | 0.81697 |
| SI48 | 0.57735 | 0.94036 | 0.35951 |
| SI49 | 0.69434 | 0.96451 | 0.21248 |
| SI50 | 0.72161 | 0.93276 | 0.99269 |
| SI51 | 0.88135 | 0.93175 | 0.99362 |
| SI52 | 0.93283 | 0.96691 | 0.20297 |
| SI53 | 0.82001 | 0.94242 | 0.35071 |
| SI54 | 0.57882 | 0.17132 | 0.33239 |
| SI55 | 0.69608 | 0.11983 | 0.1966  |

|      |         |         |         |
|------|---------|---------|---------|
| SI56 | 0.73506 | 0.16488 | 0.97861 |
| SI57 | 0.88936 | 0.16935 | 0.98067 |
| SI58 | 0.93942 | 0.12416 | 0.19195 |
| SI59 | 0.81936 | 0.16357 | 0.32184 |
| SI60 | 0.92484 | 0.05021 | 0.85202 |
| SI61 | 0.80251 | 0.02105 | 0.70594 |
| SI62 | 0.78221 | 0.06398 | 0.48859 |
| SI63 | 0.62219 | 0.06812 | 0.48875 |
| SI64 | 0.57151 | 0.02759 | 0.69984 |
| SI65 | 0.68074 | 0.04895 | 0.85055 |
| SI66 | 0.92175 | 0.82615 | 0.8342  |
| SI67 | 0.80264 | 0.86433 | 0.68798 |
| SI68 | 0.76783 | 0.82096 | 0.47293 |
| SI69 | 0.61315 | 0.82308 | 0.4924  |
| SI70 | 0.56608 | 0.86999 | 0.70247 |
| SI71 | 0.68285 | 0.82798 | 0.83069 |
| SI72 | 0.42298 | 0.44358 | 0.64555 |
| SI73 | 0.30377 | 0.47223 | 0.79294 |
| SI74 | 0.28664 | 0.43223 | 0.01121 |
| SI75 | 0.12834 | 0.4324  | 0.01087 |
| SI76 | 0.07698 | 0.47214 | 0.80156 |
| SI77 | 0.18316 | 0.44563 | 0.65146 |
| SI78 | 0.4232  | 0.67007 | 0.66441 |
| SI79 | 0.30342 | 0.62891 | 0.80566 |
| SI80 | 0.26946 | 0.67197 | 0.02044 |
| SI81 | 0.1148  | 0.67185 | 0.01192 |
| SI82 | 0.06543 | 0.62972 | 0.80009 |
| SI83 | 0.18325 | 0.66878 | 0.67038 |
| SI84 | 0.07775 | 0.55299 | 0.14598 |
| SI85 | 0.2005  | 0.52599 | 0.28832 |
| SI86 | 0.22582 | 0.56354 | 0.50976 |
| SI87 | 0.38546 | 0.56576 | 0.50742 |
| SI88 | 0.4325  | 0.52611 | 0.29487 |
| SI89 | 0.32516 | 0.55228 | 0.14504 |
| SI90 | 0.08276 | 0.32532 | 0.16071 |
| SI91 | 0.1987  | 0.36759 | 0.30788 |
| SI92 | 0.23391 | 0.32698 | 0.52624 |
| SI93 | 0.38835 | 0.3257  | 0.5136  |
| SI94 | 0.43629 | 0.36933 | 0.29884 |
| SI95 | 0.31998 | 0.32412 | 0.17103 |
| O96  | 0.36123 | 0.05989 | 0.71676 |
| O97  | 0.30498 | 0.06573 | 0.89412 |
| O98  | 0.2017  | 0.04559 | 0.01791 |
| O99  | 0.09779 | 0.06626 | 0.89705 |

|      |         |         |         |
|------|---------|---------|---------|
| O100 | 0.10618 | 0.054   | 0.69988 |
| O101 | 0.23267 | 0.02779 | 0.7389  |
| O102 | 0.36089 | 0.82451 | 0.75019 |
| O103 | 0.30617 | 0.84183 | 0.92525 |
| O104 | 0.19043 | 0.85164 | 0.01896 |
| O105 | 0.08623 | 0.82721 | 0.90227 |
| O106 | 0.10654 | 0.83671 | 0.70687 |
| O107 | 0.23202 | 0.85599 | 0.76176 |
| O108 | 0.32604 | 0.94661 | 0.80677 |
| O109 | 0.08722 | 0.94649 | 0.81576 |
| O110 | 0.43403 | 0.12451 | 0.582   |
| O111 | 0.42024 | 0.99292 | 0.56601 |
| O112 | 0.39937 | 0.86124 | 0.56752 |
| O113 | 0.19931 | 0.12768 | 0.61605 |
| O114 | 0.18216 | 0.00008 | 0.55984 |
| O115 | 0.19747 | 0.86605 | 0.56862 |
| O116 | 0.9907  | 0.03616 | 0.78507 |
| O117 | 0.98665 | 0.8613  | 0.7823  |
| O118 | 0.14307 | 0.93581 | 0.22003 |
| O119 | 0.20027 | 0.92916 | 0.39615 |
| O120 | 0.3001  | 0.94572 | 0.52707 |
| O121 | 0.39951 | 0.92643 | 0.39707 |
| O122 | 0.39706 | 0.94411 | 0.20037 |
| O123 | 0.27079 | 0.97044 | 0.24038 |
| O124 | 0.14327 | 0.17039 | 0.24591 |
| O125 | 0.1955  | 0.15792 | 0.42278 |
| O126 | 0.31153 | 0.1458  | 0.51483 |
| O127 | 0.41498 | 0.17037 | 0.39645 |
| O128 | 0.39508 | 0.15165 | 0.20193 |
| O129 | 0.27096 | 0.13726 | 0.26185 |
| O130 | 0.17645 | 0.04905 | 0.31205 |
| O131 | 0.41878 | 0.04765 | 0.32299 |
| O132 | 0.06812 | 0.87114 | 0.08845 |
| O133 | 0.08237 | 0.00256 | 0.07065 |
| O134 | 0.10587 | 0.13353 | 0.06363 |
| O135 | 0.30344 | 0.86898 | 0.11957 |
| O136 | 0.3202  | 0.99525 | 0.05904 |
| O137 | 0.30063 | 0.1284  | 0.06666 |
| O138 | 0.51092 | 0.95277 | 0.29298 |
| O139 | 0.51545 | 0.13512 | 0.27775 |
| O140 | 0.64019 | 0.56555 | 0.27215 |
| O141 | 0.6773  | 0.56635 | 0.08287 |
| O142 | 0.7947  | 0.55023 | 0.99392 |
| O143 | 0.91058 | 0.56764 | 0.08549 |

|      |         |         |         |
|------|---------|---------|---------|
| O144 | 0.88777 | 0.55282 | 0.28118 |
| O145 | 0.76419 | 0.53588 | 0.22266 |
| O146 | 0.64177 | 0.32796 | 0.24928 |
| O147 | 0.69198 | 0.34159 | 0.07195 |
| O148 | 0.80887 | 0.34992 | 0.9761  |
| O149 | 0.91141 | 0.32417 | 0.09805 |
| O150 | 0.90152 | 0.34137 | 0.29424 |
| O151 | 0.76781 | 0.36976 | 0.2302  |
| O152 | 0.66591 | 0.44981 | 0.18134 |
| O153 | 0.91816 | 0.44709 | 0.16953 |
| O154 | 0.56469 | 0.62462 | 0.40684 |
| O155 | 0.59499 | 0.49609 | 0.42948 |
| O156 | 0.60383 | 0.3627  | 0.4323  |
| O157 | 0.79291 | 0.62177 | 0.36991 |
| O158 | 0.80098 | 0.49007 | 0.40043 |
| O159 | 0.80109 | 0.35723 | 0.43783 |
| O160 | 0.00966 | 0.54174 | 0.21045 |
| O161 | 0.01731 | 0.36319 | 0.2052  |
| O162 | 0.87592 | 0.42733 | 0.75187 |
| O163 | 0.82505 | 0.44009 | 0.5817  |
| O164 | 0.70232 | 0.43822 | 0.50618 |
| O165 | 0.58689 | 0.42795 | 0.59977 |
| O166 | 0.60163 | 0.43506 | 0.79822 |
| O167 | 0.72801 | 0.45023 | 0.74367 |
| O168 | 0.86343 | 0.67951 | 0.73367 |
| O169 | 0.80691 | 0.64622 | 0.56219 |
| O170 | 0.68588 | 0.64347 | 0.4821  |
| O171 | 0.57888 | 0.66301 | 0.59488 |
| O172 | 0.60571 | 0.65953 | 0.78764 |
| O173 | 0.73117 | 0.6557  | 0.72123 |
| O174 | 0.82192 | 0.55666 | 0.7088  |
| O175 | 0.58333 | 0.54588 | 0.68924 |
| O176 | 0.93264 | 0.37029 | 0.91377 |
| O177 | 0.90253 | 0.49996 | 0.9154  |
| O178 | 0.88763 | 0.63237 | 0.91778 |
| O179 | 0.6941  | 0.3594  | 0.8778  |
| O180 | 0.68692 | 0.48983 | 0.92417 |
| O181 | 0.70232 | 0.62443 | 0.91073 |
| O182 | 0.4854  | 0.45637 | 0.71991 |
| O183 | 0.48388 | 0.63262 | 0.72367 |
| O184 | 0.64046 | 0.92855 | 0.28547 |
| O185 | 0.6976  | 0.92389 | 0.10757 |
| O186 | 0.80165 | 0.94522 | 0.98462 |
| O187 | 0.90291 | 0.9238  | 0.10982 |

|      |         |         |         |
|------|---------|---------|---------|
| O188 | 0.89524 | 0.9463  | 0.30595 |
| O189 | 0.76803 | 0.96216 | 0.26258 |
| O190 | 0.64358 | 0.16428 | 0.26057 |
| O191 | 0.69854 | 0.15014 | 0.08446 |
| O192 | 0.8129  | 0.14145 | 0.98655 |
| O193 | 0.92243 | 0.16585 | 0.09093 |
| O194 | 0.89586 | 0.15214 | 0.28466 |
| O195 | 0.76958 | 0.12119 | 0.24861 |
| O196 | 0.67163 | 0.0419  | 0.19327 |
| O197 | 0.92176 | 0.04548 | 0.17543 |
| O198 | 0.56668 | 0.87337 | 0.42713 |
| O199 | 0.58855 | 0.00383 | 0.43387 |
| O200 | 0.59295 | 0.13688 | 0.44073 |
| O201 | 0.80633 | 0.86671 | 0.39092 |
| O202 | 0.81333 | 0.99541 | 0.44265 |
| O203 | 0.81569 | 0.13071 | 0.43625 |
| O204 | 0.01171 | 0.9512  | 0.22002 |
| O205 | 0.01848 | 0.13362 | 0.21621 |
| O206 | 0.8599  | 0.04803 | 0.78039 |
| O207 | 0.8006  | 0.0682  | 0.60652 |
| O208 | 0.70232 | 0.06505 | 0.47063 |
| O209 | 0.60477 | 0.06849 | 0.60694 |
| O210 | 0.60581 | 0.05007 | 0.80445 |
| O211 | 0.73092 | 0.02425 | 0.7623  |
| O212 | 0.85973 | 0.83159 | 0.7576  |
| O213 | 0.80491 | 0.82651 | 0.58068 |
| O214 | 0.69091 | 0.84701 | 0.48415 |
| O215 | 0.58959 | 0.82388 | 0.60842 |
| O216 | 0.60542 | 0.84473 | 0.8021  |
| O217 | 0.72953 | 0.85424 | 0.73881 |
| O218 | 0.81708 | 0.94399 | 0.67239 |
| O219 | 0.58355 | 0.948   | 0.67864 |
| O220 | 0.93158 | 0.12408 | 0.90238 |
| O221 | 0.92007 | 0.99439 | 0.94108 |
| O222 | 0.9025  | 0.86219 | 0.93897 |
| O223 | 0.69915 | 0.12385 | 0.88882 |
| O224 | 0.68343 | 0.9971  | 0.94433 |
| O225 | 0.70244 | 0.86433 | 0.93457 |
| O226 | 0.49262 | 0.04442 | 0.7117  |
| O227 | 0.4861  | 0.86232 | 0.72058 |
| O228 | 0.35535 | 0.44243 | 0.71153 |
| O229 | 0.30523 | 0.42631 | 0.89333 |
| O230 | 0.20731 | 0.44635 | 0.02838 |
| O231 | 0.11253 | 0.43149 | 0.89209 |



|      |         |         |         |
|------|---------|---------|---------|
| O232 | 0.10675 | 0.44976 | 0.69326 |
| O233 | 0.22967 | 0.46928 | 0.74426 |
| O234 | 0.35608 | 0.66437 | 0.73119 |
| O235 | 0.30648 | 0.66676 | 0.91268 |
| O236 | 0.19227 | 0.64634 | 0.01033 |
| O237 | 0.0854  | 0.67233 | 0.89891 |
| O238 | 0.10511 | 0.65861 | 0.70254 |
| O239 | 0.22861 | 0.63662 | 0.75937 |
| O240 | 0.32139 | 0.54985 | 0.82028 |
| O241 | 0.08686 | 0.55211 | 0.81908 |
| O242 | 0.4318  | 0.3719  | 0.58928 |
| O243 | 0.42203 | 0.50238 | 0.56084 |
| O244 | 0.41139 | 0.63576 | 0.55566 |
| O245 | 0.19859 | 0.36975 | 0.61499 |
| O246 | 0.19234 | 0.49601 | 0.55685 |
| O247 | 0.19918 | 0.63104 | 0.56537 |
| O248 | 0.99826 | 0.45521 | 0.7985  |
| O249 | 0.98533 | 0.63527 | 0.78025 |
| O250 | 0.14038 | 0.55822 | 0.22253 |
| O251 | 0.20619 | 0.56785 | 0.39231 |
| O252 | 0.30578 | 0.55789 | 0.52468 |
| O253 | 0.40345 | 0.56757 | 0.38989 |
| O254 | 0.399   | 0.55633 | 0.19423 |
| O255 | 0.27091 | 0.53073 | 0.22949 |
| O256 | 0.14164 | 0.33004 | 0.24331 |
| O257 | 0.19544 | 0.33829 | 0.42069 |
| O258 | 0.31109 | 0.35176 | 0.51376 |
| O259 | 0.41757 | 0.33015 | 0.40118 |
| O260 | 0.39731 | 0.3345  | 0.20543 |
| O261 | 0.27181 | 0.35431 | 0.25862 |
| O262 | 0.18337 | 0.44775 | 0.31087 |
| O263 | 0.41303 | 0.44731 | 0.30825 |
| O264 | 0.07127 | 0.62259 | 0.08321 |
| O265 | 0.08616 | 0.49132 | 0.06682 |
| O266 | 0.10686 | 0.36001 | 0.05655 |
| O267 | 0.30779 | 0.62592 | 0.1014  |
| O268 | 0.32698 | 0.49593 | 0.0572  |
| O269 | 0.30714 | 0.36233 | 0.06541 |
| O270 | 0.51258 | 0.53464 | 0.28466 |
| O271 | 0.51633 | 0.36475 | 0.28059 |
| O272 | 0.44155 | 0.74798 | 0.64441 |
| O273 | 0.19933 | 0.74781 | 0.6547  |
| O274 | 0.27225 | 0.74893 | 0.05912 |
| O275 | 0.1098  | 0.74765 | 0.05593 |

|                                                     |         |         |         |
|-----------------------------------------------------|---------|---------|---------|
| O276                                                | 0.06467 | 0.24774 | 0.13748 |
| O277                                                | 0.30436 | 0.24518 | 0.15435 |
| O278                                                | 0.23088 | 0.24877 | 0.55825 |
| O279                                                | 0.3934  | 0.24863 | 0.55204 |
| O280                                                | 0.56196 | 0.24952 | 0.35339 |
| O281                                                | 0.79958 | 0.24079 | 0.32575 |
| O282                                                | 0.73008 | 0.24348 | 0.9507  |
| O283                                                | 0.89088 | 0.24654 | 0.94165 |
| O284                                                | 0.93794 | 0.74804 | 0.85919 |
| O285                                                | 0.69391 | 0.74877 | 0.85064 |
| O286                                                | 0.76994 | 0.74344 | 0.43543 |
| O287                                                | 0.60472 | 0.74763 | 0.44836 |
| O288                                                | 0.95052 | 0.2518  | 0.4225  |
| O289                                                | 0.90563 | 0.18724 | 0.56834 |
| O290                                                | 0.88639 | 0.31476 | 0.55943 |
| O291                                                | 1.0017  | 0.26813 | 0.6006  |
| GA29                                                | 0.91718 | 0.4038  | 0.61493 |
| H293                                                | 0.93823 | 0.29025 | 0.37692 |
| H294                                                | 0.84746 | 0.32397 | 0.50801 |
| H295                                                | 0.87352 | 0.16842 | 0.51897 |
| H296                                                | 0.97352 | 0.59802 | 0.5942  |
| H297                                                | 0.08148 | 0.5441  | 0.55725 |
| H298                                                | 0.08292 | 0.62711 | 0.50918 |
| H299                                                | 0.07093 | 0.55886 | 0.42671 |
| H300                                                | 0.97297 | 0.63601 | 0.37229 |
| H301                                                | 0.98497 | 0.69045 | 0.47669 |
| H302                                                | 0.90614 | 0.65184 | 0.4566  |
| H303                                                | 0.91932 | 0.43047 | 0.43257 |
| H304                                                | 0.04087 | 0.42881 | 0.36572 |
| H305                                                | 0.89063 | 0.53345 | 0.49633 |
| H306                                                | 0.99081 | 0.39018 | 0.64117 |
| H307                                                | 0.02663 | 0.37444 | 0.46761 |
| H308                                                | 0.0685  | 0.45148 | 0.48746 |
| AL30                                                | 0.81506 | 0.32549 | 0.31496 |
| AL31                                                | 0.80502 | 0.4728  | 0.70398 |
| P311                                                | 0.94273 | 0.25383 | 0.53925 |
| C312                                                | 0.98459 | 0.58479 | 0.51547 |
| C313                                                | 0.05934 | 0.57777 | 0.50181 |
| C314                                                | 0.96011 | 0.64428 | 0.45113 |
| C315                                                | 0.9613  | 0.46048 | 0.46186 |
| C316                                                | 0.94422 | 0.52354 | 0.49205 |
| C317                                                | 0.02803 | 0.42779 | 0.44567 |
| <b>C<sub>6</sub>H<sub>11</sub>Ga+H<sub>2</sub>*</b> |         |         |         |

|      |         |         |         |
|------|---------|---------|---------|
| SI2  | 0.42597 | 0.05411 | 0.6439  |
| SI3  | 0.3058  | 0.02418 | 0.78719 |
| SI4  | 0.28261 | 0.05819 | 0.00926 |
| SI5  | 0.12285 | 0.06053 | 0.01053 |
| SI6  | 0.0708  | 0.02542 | 0.79806 |
| SI7  | 0.18033 | 0.05109 | 0.65029 |
| SI8  | 0.42242 | 0.82396 | 0.67143 |
| SI9  | 0.30474 | 0.86648 | 0.80903 |
| SI10 | 0.26759 | 0.82651 | 0.02859 |
| SI11 | 0.113   | 0.82375 | 0.01614 |
| SI12 | 0.0658  | 0.8675  | 0.80107 |
| SI13 | 0.18299 | 0.82394 | 0.67325 |
| SI14 | 0.07683 | 0.94035 | 0.14944 |
| SI15 | 0.19775 | 0.96938 | 0.29327 |
| SI16 | 0.21991 | 0.93135 | 0.51333 |
| SI17 | 0.37949 | 0.93039 | 0.51366 |
| SI18 | 0.43176 | 0.96643 | 0.30349 |
| SI19 | 0.32208 | 0.94277 | 0.15391 |
| SI20 | 0.08216 | 0.16881 | 0.16457 |
| SI21 | 0.19853 | 0.12615 | 0.30827 |
| SI22 | 0.23635 | 0.16915 | 0.52447 |
| SI23 | 0.39068 | 0.17128 | 0.51003 |
| SI24 | 0.43789 | 0.12407 | 0.29907 |
| SI25 | 0.31967 | 0.16388 | 0.16989 |
| SI26 | 0.57416 | 0.55687 | 0.34511 |
| SI27 | 0.68817 | 0.5289  | 0.19161 |
| SI28 | 0.71287 | 0.55531 | 0.97845 |
| SI29 | 0.87204 | 0.55911 | 0.97099 |
| SI30 | 0.93223 | 0.5255  | 0.18276 |
| SI31 | 0.8147  | 0.55655 | 0.31455 |
| SI32 | 0.57968 | 0.32643 | 0.32597 |
| SI33 | 0.69546 | 0.37122 | 0.18254 |
| SI34 | 0.72895 | 0.32174 | 0.9712  |
| SI35 | 0.88337 | 0.32262 | 0.98168 |
| SI36 | 0.93715 | 0.36679 | 0.19403 |
| SI37 | 0.92362 | 0.43492 | 0.83613 |
| SI38 | 0.7734  | 0.44106 | 0.46538 |
| SI39 | 0.61474 | 0.43549 | 0.48078 |
| SI40 | 0.5693  | 0.46803 | 0.69827 |
| SI41 | 0.67764 | 0.43372 | 0.84038 |
| SI42 | 0.91619 | 0.672   | 0.82213 |
| SI43 | 0.80346 | 0.63426 | 0.68341 |
| SI44 | 0.76322 | 0.66683 | 0.46265 |
| SI45 | 0.60898 | 0.67114 | 0.4802  |

|      |         |         |         |
|------|---------|---------|---------|
| SI46 | 0.56407 | 0.62531 | 0.69687 |
| SI47 | 0.68189 | 0.67053 | 0.81903 |
| SI48 | 0.57782 | 0.94068 | 0.35991 |
| SI49 | 0.69547 | 0.96449 | 0.21475 |
| SI50 | 0.72217 | 0.93174 | 0.99392 |
| SI51 | 0.88164 | 0.9306  | 0.99473 |
| SI52 | 0.93197 | 0.96786 | 0.20421 |
| SI53 | 0.821   | 0.94321 | 0.35409 |
| SI54 | 0.58005 | 0.17067 | 0.33403 |
| SI55 | 0.69856 | 0.11974 | 0.20107 |
| SI56 | 0.73459 | 0.16354 | 0.98083 |
| SI57 | 0.88831 | 0.16872 | 0.98374 |
| SI58 | 0.93782 | 0.12514 | 0.19587 |
| SI59 | 0.82053 | 0.16358 | 0.33008 |
| SI60 | 0.92596 | 0.04988 | 0.85598 |
| SI61 | 0.80307 | 0.02111 | 0.71115 |
| SI62 | 0.78372 | 0.0641  | 0.49359 |
| SI63 | 0.62298 | 0.06822 | 0.49069 |
| SI64 | 0.57086 | 0.02565 | 0.70112 |
| SI65 | 0.67931 | 0.04803 | 0.85284 |
| SI66 | 0.9216  | 0.82456 | 0.83676 |
| SI67 | 0.80214 | 0.86382 | 0.69211 |
| SI68 | 0.76749 | 0.8229  | 0.47591 |
| SI69 | 0.61357 | 0.82448 | 0.49476 |
| SI70 | 0.56624 | 0.86826 | 0.70534 |
| SI71 | 0.68267 | 0.82602 | 0.83447 |
| SI72 | 0.42483 | 0.44367 | 0.63933 |
| SI73 | 0.30867 | 0.46866 | 0.79361 |
| SI74 | 0.28649 | 0.42982 | 0.00773 |
| SI75 | 0.12745 | 0.4298  | 0.00684 |
| SI76 | 0.0729  | 0.46695 | 0.79732 |
| SI77 | 0.18753 | 0.44271 | 0.65643 |
| SI78 | 0.42389 | 0.66892 | 0.66218 |
| SI79 | 0.30402 | 0.62576 | 0.80245 |
| SI80 | 0.26749 | 0.67028 | 0.01575 |
| SI81 | 0.11264 | 0.67057 | 0.00838 |
| SI82 | 0.0612  | 0.62554 | 0.79898 |
| SI83 | 0.18122 | 0.66515 | 0.67074 |
| SI84 | 0.07879 | 0.55127 | 0.14364 |
| SI85 | 0.19849 | 0.52336 | 0.28913 |
| SI86 | 0.22528 | 0.56299 | 0.51039 |
| SI87 | 0.38552 | 0.56771 | 0.50245 |
| SI88 | 0.4327  | 0.52846 | 0.28853 |
| SI89 | 0.32132 | 0.55096 | 0.14529 |

|      |         |         |         |
|------|---------|---------|---------|
| SI90 | 0.08391 | 0.32336 | 0.16179 |
| SI91 | 0.19836 | 0.36511 | 0.3087  |
| SI92 | 0.23704 | 0.32579 | 0.52673 |
| SI93 | 0.39129 | 0.32536 | 0.50837 |
| SI94 | 0.43727 | 0.36992 | 0.29228 |
| SI95 | 0.31843 | 0.32278 | 0.1701  |
| O96  | 0.36082 | 0.05939 | 0.71549 |
| O97  | 0.30485 | 0.06371 | 0.89316 |
| O98  | 0.2025  | 0.04685 | 0.02002 |
| O99  | 0.10062 | 0.06482 | 0.89451 |
| O100 | 0.10562 | 0.05395 | 0.69711 |
| O101 | 0.23205 | 0.0287  | 0.73763 |
| O102 | 0.36022 | 0.82338 | 0.74889 |
| O103 | 0.3055  | 0.84202 | 0.92414 |
| O104 | 0.18995 | 0.85042 | 0.01984 |
| O105 | 0.08608 | 0.82782 | 0.90234 |
| O106 | 0.10543 | 0.83497 | 0.7064  |
| O107 | 0.23098 | 0.85369 | 0.76124 |
| O108 | 0.32468 | 0.94548 | 0.80289 |
| O109 | 0.08654 | 0.94587 | 0.81206 |
| O110 | 0.43553 | 0.12412 | 0.58274 |
| O111 | 0.41902 | 0.99315 | 0.56367 |
| O112 | 0.40138 | 0.86093 | 0.56782 |
| O113 | 0.19882 | 0.12535 | 0.60934 |
| O114 | 0.18151 | -0.0039 | 0.56035 |
| O115 | 0.1974  | 0.86202 | 0.56802 |
| O116 | 0.99107 | 0.03763 | 0.78637 |
| O117 | 0.98581 | 0.86015 | 0.7834  |
| O118 | 0.14217 | 0.93621 | 0.2206  |
| O119 | 0.20033 | 0.92585 | 0.39594 |
| O120 | 0.29981 | 0.94257 | 0.52758 |
| O121 | 0.3989  | 0.9251  | 0.39633 |
| O122 | 0.39707 | 0.94255 | 0.19982 |
| O123 | 0.27053 | 0.96788 | 0.24007 |
| O124 | 0.14384 | 0.16633 | 0.24264 |
| O125 | 0.19869 | 0.15985 | 0.4182  |
| O126 | 0.31365 | 0.14461 | 0.51447 |
| O127 | 0.41677 | 0.16876 | 0.39554 |
| O128 | 0.39716 | 0.15067 | 0.20139 |
| O129 | 0.27212 | 0.13328 | 0.25773 |
| O130 | 0.17832 | 0.04721 | 0.31669 |
| O131 | 0.41915 | 0.04621 | 0.32179 |
| O132 | 0.06785 | 0.8695  | 0.09029 |
| O133 | 0.08341 | 0.00012 | 0.06699 |

|      |         |         |         |
|------|---------|---------|---------|
| O134 | 0.10316 | 0.13174 | 0.06128 |
| O135 | 0.30367 | 0.86704 | 0.11856 |
| O136 | 0.31999 | 0.9938  | 0.05904 |
| O137 | 0.30414 | 0.12768 | 0.06381 |
| O138 | 0.51104 | 0.95139 | 0.29341 |
| O139 | 0.5176  | 0.13265 | 0.2793  |
| O140 | 0.64169 | 0.56033 | 0.27897 |
| O141 | 0.67683 | 0.56765 | 0.0861  |
| O142 | 0.79349 | 0.54713 | 0.99141 |
| O143 | 0.91334 | 0.55784 | 0.07504 |
| O144 | 0.89058 | 0.56146 | 0.27236 |
| O145 | 0.7658  | 0.54203 | 0.2211  |
| O146 | 0.6449  | 0.33013 | 0.25569 |
| O147 | 0.68773 | 0.33872 | 0.07193 |
| O148 | 0.80627 | 0.34856 | 0.97877 |
| O149 | 0.9137  | 0.32736 | 0.09327 |
| O150 | 0.90263 | 0.33386 | 0.2919  |
| O151 | 0.77107 | 0.36468 | 0.22069 |
| O152 | 0.6718  | 0.44961 | 0.18019 |
| O153 | 0.91661 | 0.44562 | 0.18163 |
| O154 | 0.56415 | 0.62846 | 0.40149 |
| O155 | 0.57495 | 0.49767 | 0.42948 |
| O156 | 0.59332 | 0.36429 | 0.4319  |
| O157 | 0.79673 | 0.62617 | 0.37052 |
| O158 | 0.80964 | 0.49328 | 0.39107 |
| O159 | 0.79379 | 0.36319 | 0.42779 |
| O160 | 0.01072 | 0.53919 | 0.20689 |
| O161 | 0.01841 | 0.36247 | 0.20331 |
| O162 | 0.87353 | 0.424   | 0.73832 |
| O163 | 0.805   | 0.44655 | 0.57455 |
| O164 | 0.69369 | 0.44969 | 0.46099 |
| O165 | 0.59815 | 0.43109 | 0.59864 |
| O166 | 0.60142 | 0.43536 | 0.79767 |
| O167 | 0.72907 | 0.45389 | 0.75464 |
| O168 | 0.86042 | 0.68149 | 0.73542 |
| O169 | 0.80335 | 0.65075 | 0.56445 |
| O170 | 0.68566 | 0.64368 | 0.47599 |
| O171 | 0.57963 | 0.66278 | 0.59196 |
| O172 | 0.60406 | 0.66234 | 0.7867  |
| O173 | 0.72911 | 0.65473 | 0.72333 |
| O174 | 0.82187 | 0.55769 | 0.70747 |
| O175 | 0.58736 | 0.5475  | 0.68968 |
| O176 | 0.92745 | 0.36878 | 0.90544 |
| O177 | 0.89979 | 0.49902 | 0.89934 |

|      |         |         |         |
|------|---------|---------|---------|
| O178 | 0.88576 | 0.63061 | 0.91672 |
| O179 | 0.69185 | 0.35739 | 0.87822 |
| O180 | 0.68254 | 0.48603 | 0.93414 |
| O181 | 0.69857 | 0.62046 | 0.91027 |
| O182 | 0.48916 | 0.45811 | 0.70877 |
| O183 | 0.48445 | 0.63099 | 0.72089 |
| O184 | 0.64067 | 0.92786 | 0.28559 |
| O185 | 0.69998 | 0.92426 | 0.10971 |
| O186 | 0.80211 | 0.94452 | 0.98232 |
| O187 | 0.90131 | 0.92447 | 0.11191 |
| O188 | 0.89604 | 0.94683 | 0.30834 |
| O189 | 0.76854 | 0.96273 | 0.26663 |
| O190 | 0.64555 | 0.16423 | 0.26387 |
| O191 | 0.70134 | 0.15059 | 0.08935 |
| O192 | 0.81235 | 0.13925 | 0.9844  |
| O193 | 0.91817 | 0.16743 | 0.09631 |
| O194 | 0.89736 | 0.15402 | 0.2915  |
| O195 | 0.77155 | 0.12111 | 0.25487 |
| O196 | 0.67327 | 0.04208 | 0.19595 |
| O197 | 0.91925 | 0.04663 | 0.17874 |
| O198 | 0.56683 | 0.87526 | 0.43073 |
| O199 | 0.58986 | 0.00551 | 0.43129 |
| O200 | 0.59467 | 0.13779 | 0.44345 |
| O201 | 0.8073  | 0.86771 | 0.39431 |
| O202 | 0.8147  | 0.99575 | 0.44667 |
| O203 | 0.81735 | 0.13064 | 0.44326 |
| O204 | 0.01125 | 0.95292 | 0.21804 |
| O205 | 0.01759 | 0.13328 | 0.21625 |
| O206 | 0.86025 | 0.04861 | 0.78572 |
| O207 | 0.80374 | 0.06829 | 0.61142 |
| O208 | 0.70355 | 0.06463 | 0.47757 |
| O209 | 0.60339 | 0.06683 | 0.60805 |
| O210 | 0.60469 | 0.04879 | 0.80574 |
| O211 | 0.73072 | 0.02589 | 0.76467 |
| O212 | 0.85898 | 0.83063 | 0.76148 |
| O213 | 0.8046  | 0.82759 | 0.58373 |
| O214 | 0.69092 | 0.85011 | 0.48772 |
| O215 | 0.58949 | 0.8227  | 0.61059 |
| O216 | 0.60531 | 0.84257 | 0.80498 |
| O217 | 0.72906 | 0.8528  | 0.7425  |
| O218 | 0.81678 | 0.94377 | 0.67894 |
| O219 | 0.58426 | 0.94617 | 0.68135 |
| O220 | 0.93336 | 0.12281 | 0.90949 |
| O221 | 0.92208 | 0.99225 | 0.94228 |

|      |         |         |         |
|------|---------|---------|---------|
| O222 | 0.90333 | 0.86044 | 0.94228 |
| O223 | 0.69577 | 0.12254 | 0.89401 |
| O224 | 0.68272 | 0.99501 | 0.94493 |
| O225 | 0.70217 | 0.86265 | 0.93825 |
| O226 | 0.49168 | 0.04143 | 0.71189 |
| O227 | 0.48613 | 0.86108 | 0.72326 |
| O228 | 0.35892 | 0.43997 | 0.70938 |
| O229 | 0.315   | 0.4236  | 0.89439 |
| O230 | 0.20678 | 0.44535 | 0.00883 |
| O231 | 0.10188 | 0.42545 | 0.89196 |
| O232 | 0.11016 | 0.44666 | 0.69381 |
| O233 | 0.23249 | 0.46228 | 0.75289 |
| O234 | 0.35603 | 0.66172 | 0.72724 |
| O235 | 0.30656 | 0.66372 | 0.90966 |
| O236 | 0.19024 | 0.64656 | 0.00107 |
| O237 | 0.08039 | 0.66895 | 0.89735 |
| O238 | 0.1036  | 0.65327 | 0.70355 |
| O239 | 0.22892 | 0.63155 | 0.75601 |
| O240 | 0.32405 | 0.54723 | 0.81779 |
| O241 | 0.0791  | 0.54689 | 0.81916 |
| O242 | 0.43512 | 0.37227 | 0.58257 |
| O243 | 0.41824 | 0.50226 | 0.55553 |
| O244 | 0.41426 | 0.6362  | 0.55191 |
| O245 | 0.20258 | 0.36722 | 0.61741 |
| O246 | 0.20112 | 0.49433 | 0.56518 |
| O247 | 0.19407 | 0.62928 | 0.56351 |
| O248 | 0.99483 | 0.44633 | 0.78032 |
| O249 | 0.98176 | 0.63341 | 0.77675 |
| O250 | 0.141   | 0.55732 | 0.22052 |
| O251 | 0.20119 | 0.56268 | 0.39497 |
| O252 | 0.30561 | 0.56572 | 0.51804 |
| O253 | 0.40455 | 0.56848 | 0.38541 |
| O254 | 0.39598 | 0.55751 | 0.19005 |
| O255 | 0.27036 | 0.52937 | 0.23423 |
| O256 | 0.14126 | 0.32463 | 0.24758 |
| O257 | 0.19712 | 0.33807 | 0.4228  |
| O258 | 0.3138  | 0.35058 | 0.51156 |
| O259 | 0.41883 | 0.33054 | 0.39497 |
| O260 | 0.39585 | 0.33666 | 0.20006 |
| O261 | 0.27145 | 0.35201 | 0.25966 |
| O262 | 0.18081 | 0.44464 | 0.30634 |
| O263 | 0.41767 | 0.44874 | 0.30339 |
| O264 | 0.07155 | 0.6211  | 0.08209 |
| O265 | 0.08841 | 0.48973 | 0.06481 |



|      |          |         |         |
|------|----------|---------|---------|
| O266 | 0.11173  | 0.35832 | 0.06009 |
| O267 | 0.30132  | 0.62322 | 0.09967 |
| O268 | 0.32325  | 0.49318 | 0.06001 |
| O269 | 0.30127  | 0.35969 | 0.06504 |
| O270 | 0.51157  | 0.54274 | 0.27147 |
| O271 | 0.51651  | 0.36162 | 0.26922 |
| O272 | 0.44193  | 0.74721 | 0.64514 |
| O273 | 0.19731  | 0.74444 | 0.65808 |
| O274 | 0.27186  | 0.74714 | 0.05481 |
| O275 | 0.10817  | 0.74622 | 0.05303 |
| O276 | 0.065    | 0.24615 | 0.13686 |
| O277 | 0.30509  | 0.24328 | 0.15561 |
| O278 | 0.23368  | 0.24728 | 0.55793 |
| O279 | 0.3965   | 0.24848 | 0.54788 |
| O280 | 0.56187  | 0.24893 | 0.35136 |
| O281 | 0.79874  | 0.2404  | 0.33551 |
| O282 | 0.72931  | 0.24173 | 0.95105 |
| O283 | 0.88922  | 0.24552 | 0.94302 |
| O284 | 0.93786  | 0.74633 | 0.86068 |
| O285 | 0.69419  | 0.74697 | 0.85574 |
| O286 | 0.76783  | 0.74616 | 0.43593 |
| O287 | 0.60595  | 0.74968 | 0.44829 |
| O288 | 0.94756  | 0.25007 | 0.46434 |
| O289 | 0.90519  | 0.20071 | 0.62143 |
| O290 | 0.86112  | 0.31892 | 0.564   |
| O291 | -0.03074 | 0.31057 | 0.63844 |
| GA29 | 0.9207   | 0.39884 | 0.61373 |
| H293 | 0.94493  | 0.28501 | 0.41139 |
| H294 | 0.81895  | 0.33813 | 0.48717 |
| H295 | 0.88116  | 0.16892 | 0.578   |
| H296 | 0.99304  | 0.52883 | 0.62875 |
| H297 | 0.09047  | 0.50025 | 0.51565 |
| H298 | 0.07776  | 0.58818 | 0.53302 |
| H299 | 0.05289  | 0.54869 | 0.42008 |
| H300 | 0.94309  | 0.59693 | 0.43833 |
| H301 | 0.96027  | 0.63549 | 0.55535 |
| H302 | 0.89132  | 0.58002 | 0.54312 |
| H303 | 0.98755  | 0.43628 | 0.35841 |
| H304 | 0.06868  | 0.35125 | 0.39375 |
| H305 | 0.90901  | 0.47523 | 0.47373 |
| H306 | 0.11697  | 0.25073 | 0.65571 |
| H307 | 0.08174  | 0.26385 | 0.65686 |
| H308 | 0.05611  | 0.36015 | 0.53046 |
| AL30 | 0.81643  | 0.32294 | 0.3096  |

|                                      |         |         |         |
|--------------------------------------|---------|---------|---------|
| AL31                                 | 0.80144 | 0.47435 | 0.69722 |
| P311                                 | 0.92184 | 0.27002 | 0.57164 |
| C312                                 | 0.98798 | 0.52997 | 0.54686 |
| C313                                 | 0.05652 | 0.54202 | 0.50148 |
| C314                                 | 0.94283 | 0.58887 | 0.51969 |
| C315                                 | 0.9967  | 0.42276 | 0.43646 |
| C316                                 | 0.95633 | 0.46214 | 0.51019 |
| C317                                 | 0.04285 | 0.37596 | 0.455   |
| <b>C<sub>6</sub>H<sub>11</sub>Ga</b> |         |         |         |
| SI2                                  | 0.42627 | 0.05336 | 0.64322 |
| SI3                                  | 0.3064  | 0.02386 | 0.78745 |
| SI4                                  | 0.28203 | 0.05783 | 0.00842 |
| SI5                                  | 0.12259 | 0.05995 | 0.01047 |
| SI6                                  | 0.07047 | 0.02446 | 0.79877 |
| SI7                                  | 0.18066 | 0.05038 | 0.65098 |
| SI8                                  | 0.42257 | 0.82386 | 0.67171 |
| SI9                                  | 0.30536 | 0.86658 | 0.8099  |
| SI10                                 | 0.26723 | 0.82667 | 0.0293  |
| SI11                                 | 0.11294 | 0.82327 | 0.01647 |
| SI12                                 | 0.06619 | 0.86678 | 0.80179 |
| SI13                                 | 0.18373 | 0.82458 | 0.67303 |
| SI14                                 | 0.07655 | 0.93993 | 0.14934 |
| SI15                                 | 0.19747 | 0.96942 | 0.29247 |
| SI16                                 | 0.22013 | 0.93173 | 0.51261 |
| SI17                                 | 0.3795  | 0.92963 | 0.51356 |
| SI18                                 | 0.43149 | 0.9663  | 0.30378 |
| SI19                                 | 0.32201 | 0.94332 | 0.15351 |
| SI20                                 | 0.08267 | 0.16872 | 0.16487 |
| SI21                                 | 0.19775 | 0.12597 | 0.30954 |
| SI22                                 | 0.23556 | 0.16874 | 0.52618 |
| SI23                                 | 0.38994 | 0.17073 | 0.50986 |
| SI24                                 | 0.43651 | 0.12373 | 0.29883 |
| SI25                                 | 0.31824 | 0.16343 | 0.17014 |
| SI26                                 | 0.57464 | 0.55524 | 0.34783 |
| SI27                                 | 0.68742 | 0.52762 | 0.1927  |
| SI28                                 | 0.71384 | 0.55539 | 0.98039 |
| SI29                                 | 0.87274 | 0.55889 | 0.97252 |
| SI30                                 | 0.93191 | 0.52432 | 0.18358 |
| SI31                                 | 0.8137  | 0.55368 | 0.31665 |
| SI32                                 | 0.57918 | 0.32565 | 0.32653 |
| SI33                                 | 0.69458 | 0.3711  | 0.18335 |
| SI34                                 | 0.72917 | 0.32121 | 0.97171 |
| SI35                                 | 0.88349 | 0.3215  | 0.98154 |

|      |         |         |         |
|------|---------|---------|---------|
| SI36 | 0.9368  | 0.36552 | 0.19281 |
| SI37 | 0.92508 | 0.4344  | 0.83859 |
| SI38 | 0.77343 | 0.4382  | 0.46937 |
| SI39 | 0.61435 | 0.43294 | 0.48402 |
| SI40 | 0.56842 | 0.46685 | 0.70039 |
| SI41 | 0.67824 | 0.4341  | 0.84241 |
| SI42 | 0.91676 | 0.67136 | 0.82245 |
| SI43 | 0.80504 | 0.63237 | 0.68272 |
| SI44 | 0.76337 | 0.6654  | 0.46253 |
| SI45 | 0.60905 | 0.67025 | 0.48186 |
| SI46 | 0.5645  | 0.62437 | 0.69808 |
| SI47 | 0.68359 | 0.66922 | 0.8192  |
| SI48 | 0.57772 | 0.93992 | 0.35923 |
| SI49 | 0.69482 | 0.96334 | 0.21331 |
| SI50 | 0.72197 | 0.93117 | 0.99266 |
| SI51 | 0.8815  | 0.93039 | 0.99394 |
| SI52 | 0.93194 | 0.96745 | 0.20358 |
| SI53 | 0.82037 | 0.9423  | 0.35265 |
| SI54 | 0.57894 | 0.16984 | 0.33249 |
| SI55 | 0.69758 | 0.11863 | 0.19972 |
| SI56 | 0.73472 | 0.1629  | 0.98006 |
| SI57 | 0.88854 | 0.16806 | 0.98122 |
| SI58 | 0.93817 | 0.12489 | 0.19366 |
| SI59 | 0.81992 | 0.16315 | 0.32724 |
| SI60 | 0.92549 | 0.04906 | 0.85369 |
| SI61 | 0.80272 | 0.02034 | 0.70847 |
| SI62 | 0.78354 | 0.06407 | 0.49126 |
| SI63 | 0.62295 | 0.06794 | 0.48923 |
| SI64 | 0.57141 | 0.0256  | 0.69995 |
| SI65 | 0.67971 | 0.04761 | 0.85143 |
| SI66 | 0.92165 | 0.82417 | 0.83593 |
| SI67 | 0.80236 | 0.86316 | 0.69027 |
| SI68 | 0.76768 | 0.82154 | 0.4746  |
| SI69 | 0.61353 | 0.8235  | 0.49359 |
| SI70 | 0.56658 | 0.86824 | 0.70413 |
| SI71 | 0.683   | 0.82546 | 0.83266 |
| SI72 | 0.42442 | 0.44279 | 0.6435  |
| SI73 | 0.30817 | 0.4695  | 0.79683 |
| SI74 | 0.28734 | 0.43057 | 0.01141 |
| SI75 | 0.12866 | 0.43086 | 0.01018 |
| SI76 | 0.07456 | 0.46721 | 0.79954 |
| SI77 | 0.18827 | 0.44243 | 0.65871 |
| SI78 | 0.42473 | 0.66891 | 0.66446 |
| SI79 | 0.30428 | 0.62656 | 0.80435 |

|      |         |          |         |
|------|---------|----------|---------|
| SI80 | 0.26785 | 0.67069  | 0.01773 |
| SI81 | 0.1131  | 0.67011  | 0.01128 |
| SI82 | 0.06242 | 0.62597  | 0.80049 |
| SI83 | 0.1819  | 0.666    | 0.67166 |
| SI84 | 0.07844 | 0.55133  | 0.14712 |
| SI85 | 0.19896 | 0.52364  | 0.29099 |
| SI86 | 0.22626 | 0.56265  | 0.51294 |
| SI87 | 0.38643 | 0.56681  | 0.50615 |
| SI88 | 0.43272 | 0.52758  | 0.29142 |
| SI89 | 0.32242 | 0.55168  | 0.14702 |
| SI90 | 0.08428 | 0.3231   | 0.16208 |
| SI91 | 0.19802 | 0.36505  | 0.31063 |
| SI92 | 0.23662 | 0.32546  | 0.52828 |
| SI93 | 0.39114 | 0.3247   | 0.51106 |
| SI94 | 0.43711 | 0.36932  | 0.29463 |
| SI95 | 0.3182  | 0.32208  | 0.17249 |
| O96  | 0.36127 | 0.05874  | 0.71513 |
| O97  | 0.30506 | 0.06438  | 0.89269 |
| O98  | 0.20209 | 0.0447   | 0.0174  |
| O99  | 0.09888 | 0.06511  | 0.89511 |
| O100 | 0.10602 | 0.05216  | 0.69798 |
| O101 | 0.23271 | 0.02708  | 0.7374  |
| O102 | 0.36107 | 0.82337  | 0.75042 |
| O103 | 0.30509 | 0.84135  | 0.92461 |
| O104 | 0.18965 | 0.85063  | 0.02013 |
| O105 | 0.08627 | 0.8261   | 0.90237 |
| O106 | 0.10627 | 0.83541  | 0.70672 |
| O107 | 0.23194 | 0.85466  | 0.76047 |
| O108 | 0.32581 | 0.94548  | 0.80513 |
| O109 | 0.0865  | 0.94515  | 0.81511 |
| O110 | 0.43529 | 0.12289  | 0.58081 |
| O111 | 0.41974 | 0.9917   | 0.56412 |
| O112 | 0.40032 | 0.85987  | 0.56787 |
| O113 | 0.19867 | 0.12527  | 0.61207 |
| O114 | 0.1819  | -0.00331 | 0.5593  |
| O115 | 0.19742 | 0.86258  | 0.56754 |
| O116 | 0.99084 | 0.0361   | 0.7849  |
| O117 | 0.98633 | 0.85921  | 0.78305 |
| O118 | 0.14214 | 0.93549  | 0.22004 |
| O119 | 0.20069 | 0.92603  | 0.39521 |
| O120 | 0.29999 | 0.94289  | 0.52704 |
| O121 | 0.39906 | 0.92432  | 0.39629 |
| O122 | 0.39688 | 0.94291  | 0.19983 |
| O123 | 0.27021 | 0.96895  | 0.23903 |

|      |         |         |         |
|------|---------|---------|---------|
| O124 | 0.14332 | 0.16706 | 0.2447  |
| O125 | 0.1977  | 0.15844 | 0.42026 |
| O126 | 0.31289 | 0.14443 | 0.51555 |
| O127 | 0.41508 | 0.16893 | 0.39475 |
| O128 | 0.39578 | 0.14951 | 0.20064 |
| O129 | 0.27136 | 0.13344 | 0.25924 |
| O130 | 0.17714 | 0.04703 | 0.31564 |
| O131 | 0.41833 | 0.04591 | 0.32301 |
| O132 | 0.06734 | 0.86934 | 0.08956 |
| O133 | 0.08275 | 0.00006 | 0.06742 |
| O134 | 0.10493 | 0.13125 | 0.0625  |
| O135 | 0.30343 | 0.86756 | 0.11872 |
| O136 | 0.32038 | 0.99402 | 0.05821 |
| O137 | 0.30157 | 0.12741 | 0.06433 |
| O138 | 0.51082 | 0.95165 | 0.29341 |
| O139 | 0.51613 | 0.13225 | 0.27821 |
| O140 | 0.64169 | 0.55957 | 0.2806  |
| O141 | 0.67778 | 0.56794 | 0.08804 |
| O142 | 0.79433 | 0.54639 | 0.99331 |
| O143 | 0.91354 | 0.55888 | 0.07709 |
| O144 | 0.88966 | 0.5576  | 0.27474 |
| O145 | 0.76531 | 0.53755 | 0.22324 |
| O146 | 0.64443 | 0.32936 | 0.25628 |
| O147 | 0.68858 | 0.33759 | 0.07319 |
| O148 | 0.80659 | 0.34799 | 0.97821 |
| O149 | 0.91263 | 0.3244  | 0.09405 |
| O150 | 0.902   | 0.33362 | 0.29147 |
| O151 | 0.77002 | 0.36676 | 0.22318 |
| O152 | 0.66893 | 0.44888 | 0.17942 |
| O153 | 0.91687 | 0.44431 | 0.17768 |
| O154 | 0.56413 | 0.62667 | 0.40443 |
| O155 | 0.57644 | 0.49598 | 0.43193 |
| O156 | 0.59289 | 0.36234 | 0.43334 |
| O157 | 0.7956  | 0.62435 | 0.36969 |
| O158 | 0.80808 | 0.49221 | 0.39623 |
| O159 | 0.79471 | 0.36119 | 0.42939 |
| O160 | 0.01006 | 0.53868 | 0.20935 |
| O161 | 0.0179  | 0.36115 | 0.20264 |
| O162 | 0.87526 | 0.42234 | 0.74085 |
| O163 | 0.80578 | 0.44215 | 0.57821 |
| O164 | 0.69372 | 0.44575 | 0.46733 |
| O165 | 0.59578 | 0.4282  | 0.60121 |
| O166 | 0.60208 | 0.436   | 0.79977 |
| O167 | 0.73025 | 0.45433 | 0.75744 |

|      |         |         |         |
|------|---------|---------|---------|
| O168 | 0.86168 | 0.68006 | 0.73454 |
| O169 | 0.80426 | 0.6488  | 0.56365 |
| O170 | 0.68578 | 0.64298 | 0.47787 |
| O171 | 0.58011 | 0.66295 | 0.59403 |
| O172 | 0.60573 | 0.6595  | 0.78821 |
| O173 | 0.73073 | 0.65219 | 0.72382 |
| O174 | 0.82454 | 0.55592 | 0.70585 |
| O175 | 0.58594 | 0.54619 | 0.68784 |
| O176 | 0.92886 | 0.3683  | 0.90807 |
| O177 | 0.90061 | 0.49837 | 0.90173 |
| O178 | 0.88605 | 0.62999 | 0.91688 |
| O179 | 0.69174 | 0.35749 | 0.87959 |
| O180 | 0.68288 | 0.48636 | 0.93619 |
| O181 | 0.70079 | 0.62085 | 0.91228 |
| O182 | 0.48849 | 0.45647 | 0.71388 |
| O183 | 0.48525 | 0.63151 | 0.72397 |
| O184 | 0.64012 | 0.9267  | 0.28427 |
| O185 | 0.69903 | 0.92334 | 0.10806 |
| O186 | 0.80191 | 0.9441  | 0.98242 |
| O187 | 0.90172 | 0.92413 | 0.11088 |
| O188 | 0.89546 | 0.94642 | 0.30725 |
| O189 | 0.76799 | 0.96126 | 0.26479 |
| O190 | 0.64429 | 0.1631  | 0.26205 |
| O191 | 0.70069 | 0.14923 | 0.08786 |
| O192 | 0.81253 | 0.13883 | 0.98453 |
| O193 | 0.92006 | 0.16623 | 0.09266 |
| O194 | 0.89655 | 0.15466 | 0.28746 |
| O195 | 0.77057 | 0.12    | 0.25357 |
| O196 | 0.67247 | 0.04093 | 0.19491 |
| O197 | 0.91961 | 0.04625 | 0.17802 |
| O198 | 0.56675 | 0.87414 | 0.42933 |
| O199 | 0.59058 | 0.00429 | 0.43118 |
| O200 | 0.59339 | 0.13691 | 0.44188 |
| O201 | 0.80721 | 0.86673 | 0.39313 |
| O202 | 0.81356 | 0.9951  | 0.44478 |
| O203 | 0.81828 | 0.13005 | 0.44055 |
| O204 | 0.01112 | 0.95226 | 0.21838 |
| O205 | 0.01771 | 0.13327 | 0.21559 |
| O206 | 0.86006 | 0.04732 | 0.78307 |
| O207 | 0.8031  | 0.06781 | 0.60918 |
| O208 | 0.70344 | 0.06591 | 0.47466 |
| O209 | 0.60411 | 0.06666 | 0.60688 |
| O210 | 0.60503 | 0.04889 | 0.80463 |
| O211 | 0.73066 | 0.02499 | 0.76293 |

|      |         |         |         |
|------|---------|---------|---------|
| O212 | 0.85941 | 0.83053 | 0.75993 |
| O213 | 0.80477 | 0.82615 | 0.58245 |
| O214 | 0.69102 | 0.84862 | 0.48603 |
| O215 | 0.58965 | 0.82254 | 0.6095  |
| O216 | 0.60555 | 0.84201 | 0.8036  |
| O217 | 0.72929 | 0.85239 | 0.74074 |
| O218 | 0.8165  | 0.94307 | 0.67572 |
| O219 | 0.58497 | 0.9461  | 0.68046 |
| O220 | 0.93266 | 0.12256 | 0.90538 |
| O221 | 0.92137 | 0.99233 | 0.94129 |
| O222 | 0.90314 | 0.86038 | 0.94107 |
| O223 | 0.69676 | 0.12209 | 0.89223 |
| O224 | 0.68285 | 0.99468 | 0.94365 |
| O225 | 0.70247 | 0.86212 | 0.93643 |
| O226 | 0.49228 | 0.04149 | 0.71085 |
| O227 | 0.48641 | 0.86172 | 0.7219  |
| O228 | 0.35814 | 0.44044 | 0.71261 |
| O229 | 0.31407 | 0.42407 | 0.89722 |
| O230 | 0.20782 | 0.44713 | 0.01536 |
| O231 | 0.10469 | 0.42707 | 0.89462 |
| O232 | 0.11094 | 0.4451  | 0.69628 |
| O233 | 0.23218 | 0.46342 | 0.75554 |
| O234 | 0.35683 | 0.66192 | 0.72939 |
| O235 | 0.30619 | 0.66527 | 0.91094 |
| O236 | 0.19074 | 0.64581 | 0.00494 |
| O237 | 0.08128 | 0.66824 | 0.9     |
| O238 | 0.10429 | 0.65522 | 0.70549 |
| O239 | 0.22947 | 0.63253 | 0.75715 |
| O240 | 0.32387 | 0.54802 | 0.82112 |
| O241 | 0.08114 | 0.54736 | 0.81856 |
| O242 | 0.43383 | 0.37107 | 0.58744 |
| O243 | 0.41917 | 0.50135 | 0.55931 |
| O244 | 0.41564 | 0.63535 | 0.55468 |
| O245 | 0.20358 | 0.36684 | 0.62026 |
| O246 | 0.20214 | 0.49376 | 0.56715 |
| O247 | 0.19441 | 0.62901 | 0.56516 |
| O248 | 0.99649 | 0.44644 | 0.78426 |
| O249 | 0.98291 | 0.63318 | 0.7784  |
| O250 | 0.1402  | 0.55761 | 0.22478 |
| O251 | 0.20302 | 0.56243 | 0.39716 |
| O252 | 0.30653 | 0.56558 | 0.52245 |
| O253 | 0.40493 | 0.567   | 0.38898 |
| O254 | 0.39648 | 0.55843 | 0.1938  |
| O255 | 0.27004 | 0.53034 | 0.23413 |

|      |          |         |         |
|------|----------|---------|---------|
| O256 | 0.14073  | 0.32501 | 0.24919 |
| O257 | 0.196    | 0.33868 | 0.42512 |
| O258 | 0.3135   | 0.34954 | 0.51192 |
| O259 | 0.4203   | 0.33103 | 0.39876 |
| O260 | 0.39561  | 0.33439 | 0.20393 |
| O261 | 0.27109  | 0.35089 | 0.26217 |
| O262 | 0.18174  | 0.4448  | 0.30762 |
| O263 | 0.41637  | 0.44795 | 0.30387 |
| O264 | 0.0716   | 0.62114 | 0.08529 |
| O265 | 0.08838  | 0.48988 | 0.06817 |
| O266 | 0.11275  | 0.35872 | 0.06136 |
| O267 | 0.30333  | 0.62389 | 0.10035 |
| O268 | 0.32569  | 0.49352 | 0.06231 |
| O269 | 0.30215  | 0.36027 | 0.0681  |
| O270 | 0.51181  | 0.54063 | 0.27491 |
| O271 | 0.5163   | 0.36183 | 0.27045 |
| O272 | 0.44249  | 0.74711 | 0.64622 |
| O273 | 0.19838  | 0.74511 | 0.65758 |
| O274 | 0.27133  | 0.74754 | 0.05701 |
| O275 | 0.10864  | 0.74604 | 0.05488 |
| O276 | 0.06609  | 0.24594 | 0.1358  |
| O277 | 0.30416  | 0.2429  | 0.15567 |
| O278 | 0.23237  | 0.24695 | 0.55885 |
| O279 | 0.39625  | 0.24753 | 0.54924 |
| O280 | 0.56094  | 0.24806 | 0.35017 |
| O281 | 0.79747  | 0.23983 | 0.33203 |
| O282 | 0.72931  | 0.24124 | 0.95104 |
| O283 | 0.88905  | 0.24491 | 0.94071 |
| O284 | 0.93749  | 0.74599 | 0.86073 |
| O285 | 0.69498  | 0.74638 | 0.85313 |
| O286 | 0.7684   | 0.74465 | 0.4352  |
| O287 | 0.60559  | 0.74844 | 0.44812 |
| O288 | 0.94913  | 0.25272 | 0.45456 |
| O289 | 0.91264  | 0.19813 | 0.61086 |
| O290 | 0.86367  | 0.31625 | 0.5635  |
| O291 | -0.02588 | 0.30957 | 0.631   |
| GA29 | 0.92116  | 0.39671 | 0.61441 |
| H293 | 0.94275  | 0.28773 | 0.40185 |
| H294 | 0.82089  | 0.33583 | 0.48802 |
| H295 | 0.88843  | 0.16738 | 0.566   |
| H296 | 0.98603  | 0.53061 | 0.63236 |
| H297 | 0.08765  | 0.48983 | 0.53112 |
| H298 | 0.08278  | 0.57819 | 0.55169 |
| H299 | 0.06102  | 0.54324 | 0.43391 |



|                                              |         |         |         |
|----------------------------------------------|---------|---------|---------|
| H300                                         | 0.95351 | 0.59444 | 0.43032 |
| H301                                         | 0.96944 | 0.63692 | 0.54474 |
| H302                                         | 0.89595 | 0.58802 | 0.53094 |
| H303                                         | 0.97454 | 0.43553 | 0.35769 |
| H304                                         | 0.06339 | 0.35629 | 0.38381 |
| H305                                         | 0.90479 | 0.47736 | 0.48193 |
| H306                                         | 0.05875 | 0.36726 | 0.52149 |
| AL30                                         | 0.81561 | 0.32274 | 0.30942 |
| AL30                                         | 0.80309 | 0.47262 | 0.69953 |
| P309                                         | 0.92636 | 0.26919 | 0.56448 |
| C310                                         | 0.98721 | 0.52937 | 0.55011 |
| C311                                         | 0.05904 | 0.53509 | 0.51515 |
| C312                                         | 0.94896 | 0.59055 | 0.51203 |
| C313                                         | 0.9903  | 0.42448 | 0.4341  |
| C314                                         | 0.95343 | 0.463   | 0.51268 |
| C315                                         | 0.04015 | 0.38081 | 0.4475  |
| <b>5MR-C<sub>6</sub>H<sub>10</sub>+Ga(H)</b> |         |         |         |
| SI2                                          | 0.42639 | 0.05406 | 0.64307 |
| SI3                                          | 0.30637 | 0.02374 | 0.78656 |
| SI4                                          | 0.28159 | 0.05692 | 0.00786 |
| SI5                                          | 0.12219 | 0.06076 | 0.01111 |
| SI6                                          | 0.07039 | 0.02436 | 0.79958 |
| SI7                                          | 0.18029 | 0.05145 | 0.65122 |
| SI8                                          | 0.42226 | 0.824   | 0.67121 |
| SI9                                          | 0.30569 | 0.8663  | 0.80972 |
| SI10                                         | 0.2682  | 0.82754 | 0.02976 |
| SI11                                         | 0.11417 | 0.8238  | 0.017   |
| SI12                                         | 0.06686 | 0.86692 | 0.80286 |
| SI13                                         | 0.18375 | 0.82525 | 0.67202 |
| SI14                                         | 0.07672 | 0.94038 | 0.14961 |
| SI15                                         | 0.19757 | 0.97056 | 0.29183 |
| SI16                                         | 0.22002 | 0.93388 | 0.51233 |
| SI17                                         | 0.37926 | 0.93042 | 0.51385 |
| SI18                                         | 0.43144 | 0.96722 | 0.30474 |
| SI19                                         | 0.32227 | 0.9436  | 0.15375 |
| SI20                                         | 0.08261 | 0.16982 | 0.16542 |
| SI21                                         | 0.19742 | 0.12739 | 0.30971 |
| SI22                                         | 0.23414 | 0.16974 | 0.52717 |
| SI23                                         | 0.38844 | 0.17171 | 0.51083 |
| SI24                                         | 0.43584 | 0.12452 | 0.30069 |
| SI25                                         | 0.31854 | 0.16315 | 0.16935 |
| SI26                                         | 0.57852 | 0.5542  | 0.34767 |
| SI27                                         | 0.68398 | 0.52938 | 0.18558 |

|      |         |         |         |
|------|---------|---------|---------|
| SI28 | 0.71586 | 0.55588 | 0.97325 |
| SI29 | 0.87283 | 0.56068 | 0.97591 |
| SI30 | 0.93151 | 0.52463 | 0.18407 |
| SI31 | 0.8089  | 0.55295 | 0.31308 |
| SI32 | 0.58125 | 0.32655 | 0.32749 |
| SI33 | 0.693   | 0.37257 | 0.18189 |
| SI34 | 0.73137 | 0.32291 | 0.96907 |
| SI35 | 0.88573 | 0.3214  | 0.97808 |
| SI36 | 0.93748 | 0.36625 | 0.18878 |
| SI37 | 0.92633 | 0.4369  | 0.84248 |
| SI38 | 0.78119 | 0.43296 | 0.47274 |
| SI39 | 0.62361 | 0.4309  | 0.48938 |
| SI40 | 0.5665  | 0.46712 | 0.69929 |
| SI41 | 0.68156 | 0.43181 | 0.83033 |
| SI42 | 0.91798 | 0.67104 | 0.82203 |
| SI43 | 0.80514 | 0.63329 | 0.68079 |
| SI44 | 0.76407 | 0.66485 | 0.46166 |
| SI45 | 0.60941 | 0.66959 | 0.48254 |
| SI46 | 0.5646  | 0.62459 | 0.69826 |
| SI47 | 0.68456 | 0.67158 | 0.81607 |
| SI48 | 0.57726 | 0.94003 | 0.3598  |
| SI49 | 0.6939  | 0.96382 | 0.21348 |
| SI50 | 0.72133 | 0.93234 | 0.99317 |
| SI51 | 0.88102 | 0.93015 | 0.99343 |
| SI52 | 0.93232 | 0.967   | 0.20239 |
| SI53 | 0.82003 | 0.94259 | 0.3515  |
| SI54 | 0.57859 | 0.17108 | 0.33331 |
| SI55 | 0.69574 | 0.11872 | 0.1986  |
| SI56 | 0.73486 | 0.16364 | 0.97994 |
| SI57 | 0.88894 | 0.16805 | 0.97997 |
| SI58 | 0.9386  | 0.1244  | 0.19145 |
| SI59 | 0.81877 | 0.16275 | 0.32364 |
| SI60 | 0.92519 | 0.04868 | 0.85234 |
| SI61 | 0.80248 | 0.02069 | 0.70723 |
| SI62 | 0.78279 | 0.06397 | 0.48984 |
| SI63 | 0.62275 | 0.06808 | 0.48887 |
| SI64 | 0.57181 | 0.02658 | 0.6996  |
| SI65 | 0.68024 | 0.04858 | 0.85127 |
| SI66 | 0.92168 | 0.82445 | 0.83507 |
| SI67 | 0.80255 | 0.86387 | 0.68941 |
| SI68 | 0.7676  | 0.82142 | 0.47371 |
| SI69 | 0.61301 | 0.82281 | 0.49242 |
| SI70 | 0.5663  | 0.86911 | 0.70254 |
| SI71 | 0.68259 | 0.82724 | 0.83207 |

|      |         |          |         |
|------|---------|----------|---------|
| SI72 | 0.42324 | 0.44382  | 0.64571 |
| SI73 | 0.30499 | 0.47102  | 0.79608 |
| SI74 | 0.28838 | 0.43114  | 0.01324 |
| SI75 | 0.12986 | 0.43163  | 0.01154 |
| SI76 | 0.07793 | 0.47226  | 0.80338 |
| SI77 | 0.18494 | 0.44442  | 0.65463 |
| SI78 | 0.42504 | 0.66909  | 0.66319 |
| SI79 | 0.30227 | 0.62782  | 0.80057 |
| SI80 | 0.26964 | 0.67199  | 0.01559 |
| SI81 | 0.11515 | 0.67094  | 0.01366 |
| SI82 | 0.06515 | 0.62888  | 0.80231 |
| SI83 | 0.18015 | 0.66732  | 0.66633 |
| SI84 | 0.07801 | 0.55159  | 0.1471  |
| SI85 | 0.20275 | 0.52556  | 0.28629 |
| SI86 | 0.2257  | 0.56372  | 0.51036 |
| SI87 | 0.38513 | 0.56713  | 0.50722 |
| SI88 | 0.43154 | 0.52537  | 0.29452 |
| SI89 | 0.32743 | 0.55393  | 0.1421  |
| SI90 | 0.08406 | 0.32448  | 0.16143 |
| SI91 | 0.20148 | 0.36526  | 0.30747 |
| SI92 | 0.2339  | 0.32662  | 0.52797 |
| SI93 | 0.38852 | 0.32559  | 0.51526 |
| SI94 | 0.43609 | 0.36887  | 0.29912 |
| SI95 | 0.32212 | 0.32081  | 0.17109 |
| O96  | 0.3615  | 0.05914  | 0.71524 |
| O97  | 0.30478 | 0.06365  | 0.89228 |
| O98  | 0.20155 | 0.04441  | 0.01679 |
| O99  | 0.09784 | 0.06564  | 0.89602 |
| O100 | 0.10593 | 0.05176  | 0.69879 |
| O101 | 0.23276 | 0.02712  | 0.73648 |
| O102 | 0.36152 | 0.8226   | 0.75116 |
| O103 | 0.30606 | 0.8428   | 0.92525 |
| O104 | 0.19069 | 0.85169  | 0.02043 |
| O105 | 0.08733 | 0.82574  | 0.9029  |
| O106 | 0.10653 | 0.83574  | 0.70719 |
| O107 | 0.23237 | 0.85306  | 0.76067 |
| O108 | 0.32582 | 0.94519  | 0.80262 |
| O109 | 0.08725 | 0.94521  | 0.81692 |
| O110 | 0.43451 | 0.12355  | 0.58031 |
| O111 | 0.42029 | 0.99193  | 0.56461 |
| O112 | 0.39898 | 0.86029  | 0.56814 |
| O113 | 0.19786 | 0.1268   | 0.61418 |
| O114 | 0.18182 | -0.00086 | 0.55775 |
| O115 | 0.19705 | 0.86518  | 0.56813 |

|      |         |         |         |
|------|---------|---------|---------|
| O116 | 0.99075 | 0.03499 | 0.7846  |
| O117 | 0.98693 | 0.85968 | 0.78427 |
| O118 | 0.14249 | 0.93585 | 0.21984 |
| O119 | 0.20076 | 0.92768 | 0.39498 |
| O120 | 0.29993 | 0.94469 | 0.52694 |
| O121 | 0.39901 | 0.9246  | 0.39663 |
| O122 | 0.39705 | 0.94455 | 0.20026 |
| O123 | 0.27042 | 0.96981 | 0.23874 |
| O124 | 0.14305 | 0.16895 | 0.24553 |
| O125 | 0.19669 | 0.1583  | 0.42127 |
| O126 | 0.31152 | 0.14529 | 0.51654 |
| O127 | 0.41356 | 0.17044 | 0.39551 |
| O128 | 0.39562 | 0.14833 | 0.20108 |
| O129 | 0.27103 | 0.13625 | 0.25981 |
| O130 | 0.1771  | 0.0483  | 0.31323 |
| O131 | 0.41862 | 0.04664 | 0.32632 |
| O132 | 0.06799 | 0.87019 | 0.08871 |
| O133 | 0.08207 | 0.00149 | 0.06922 |
| O134 | 0.10567 | 0.13236 | 0.06326 |
| O135 | 0.3044  | 0.86738 | 0.12035 |
| O136 | 0.31986 | 0.9928  | 0.05683 |
| O137 | 0.30145 | 0.12587 | 0.06487 |
| O138 | 0.5107  | 0.95243 | 0.29362 |
| O139 | 0.51527 | 0.13409 | 0.27983 |
| O140 | 0.63728 | 0.56727 | 0.26682 |
| O141 | 0.67334 | 0.56329 | 0.07638 |
| O142 | 0.79466 | 0.55112 | 1.00044 |
| O143 | 0.91468 | 0.56263 | 0.07955 |
| O144 | 0.88589 | 0.55402 | 0.27474 |
| O145 | 0.76161 | 0.54087 | 0.21726 |
| O146 | 0.64044 | 0.3273  | 0.24586 |
| O147 | 0.69098 | 0.34378 | 0.06868 |
| O148 | 0.80904 | 0.34869 | 0.97502 |
| O149 | 0.9152  | 0.32416 | 0.09051 |
| O150 | 0.90093 | 0.33374 | 0.28593 |
| O151 | 0.76697 | 0.36799 | 0.22745 |
| O152 | 0.66581 | 0.45002 | 0.18343 |
| O153 | 0.91731 | 0.44468 | 0.17241 |
| O154 | 0.56467 | 0.62381 | 0.40759 |
| O155 | 0.59921 | 0.49606 | 0.42685 |
| O156 | 0.60582 | 0.36213 | 0.43067 |
| O157 | 0.79427 | 0.6241  | 0.36706 |
| O158 | 0.79635 | 0.49197 | 0.39292 |
| O159 | 0.80457 | 0.35931 | 0.4327  |

|      |         |         |         |
|------|---------|---------|---------|
| O160 | 0.00965 | 0.5395  | 0.21053 |
| O161 | 0.01808 | 0.36204 | 0.20521 |
| O162 | 0.8777  | 0.42593 | 0.74386 |
| O163 | 0.82798 | 0.44372 | 0.5743  |
| O164 | 0.70414 | 0.43591 | 0.50615 |
| O165 | 0.58756 | 0.42837 | 0.5971  |
| O166 | 0.6037  | 0.43513 | 0.79522 |
| O167 | 0.73018 | 0.44497 | 0.73714 |
| O168 | 0.86414 | 0.67829 | 0.73185 |
| O169 | 0.8072  | 0.64592 | 0.56041 |
| O170 | 0.68651 | 0.6432  | 0.47918 |
| O171 | 0.58054 | 0.66351 | 0.59476 |
| O172 | 0.6066  | 0.65949 | 0.78775 |
| O173 | 0.73151 | 0.65818 | 0.71876 |
| O174 | 0.81918 | 0.55633 | 0.70855 |
| O175 | 0.58553 | 0.54623 | 0.68745 |
| O176 | 0.93177 | 0.36784 | 0.90552 |
| O177 | 0.89623 | 0.49663 | 0.9095  |
| O178 | 0.88643 | 0.63008 | 0.91599 |
| O179 | 0.69467 | 0.35684 | 0.87424 |
| O180 | 0.69282 | 0.4875  | 0.91809 |
| O181 | 0.70464 | 0.62239 | 0.90678 |
| O182 | 0.48678 | 0.45817 | 0.71737 |
| O183 | 0.48541 | 0.63223 | 0.72399 |
| O184 | 0.63995 | 0.927   | 0.28538 |
| O185 | 0.69798 | 0.92379 | 0.1083  |
| O186 | 0.80142 | 0.9441  | 0.98366 |
| O187 | 0.90228 | 0.9234  | 0.10989 |
| O188 | 0.89493 | 0.94676 | 0.30568 |
| O189 | 0.76736 | 0.96196 | 0.26421 |
| O190 | 0.64313 | 0.16396 | 0.26112 |
| O191 | 0.6994  | 0.1487  | 0.08642 |
| O192 | 0.81265 | 0.1396  | 0.98558 |
| O193 | 0.92133 | 0.16647 | 0.09084 |
| O194 | 0.89489 | 0.15254 | 0.28401 |
| O195 | 0.76882 | 0.11932 | 0.25205 |
| O196 | 0.67042 | 0.0411  | 0.19507 |
| O197 | 0.9212  | 0.04563 | 0.17457 |
| O198 | 0.56618 | 0.87354 | 0.42842 |
| O199 | 0.58958 | 0.004   | 0.43285 |
| O200 | 0.59331 | 0.13716 | 0.44189 |
| O201 | 0.80678 | 0.867   | 0.39226 |
| O202 | 0.81377 | 0.99546 | 0.44365 |
| O203 | 0.81715 | 0.1305  | 0.43835 |

|      |         |         |         |
|------|---------|---------|---------|
| O204 | 0.0112  | 0.9512  | 0.21909 |
| O205 | 0.01772 | 0.1338  | 0.21552 |
| O206 | 0.85997 | 0.04779 | 0.78129 |
| O207 | 0.80084 | 0.06784 | 0.60784 |
| O208 | 0.70296 | 0.06563 | 0.47116 |
| O209 | 0.6054  | 0.06755 | 0.60706 |
| O210 | 0.60548 | 0.04929 | 0.80457 |
| O211 | 0.73086 | 0.02436 | 0.76333 |
| O212 | 0.86004 | 0.83083 | 0.7579  |
| O213 | 0.80409 | 0.82643 | 0.58187 |
| O214 | 0.69059 | 0.84745 | 0.4841  |
| O215 | 0.58963 | 0.82287 | 0.60855 |
| O216 | 0.60524 | 0.84333 | 0.80221 |
| O217 | 0.72968 | 0.85384 | 0.74095 |
| O218 | 0.81697 | 0.94357 | 0.67412 |
| O219 | 0.58443 | 0.94701 | 0.67891 |
| O220 | 0.9324  | 0.12203 | 0.90424 |
| O221 | 0.92039 | 0.99198 | 0.93995 |
| O222 | 0.9019  | 0.86004 | 0.94012 |
| O223 | 0.69783 | 0.12349 | 0.89028 |
| O224 | 0.68323 | 0.99674 | 0.94499 |
| O225 | 0.70105 | 0.8639  | 0.93607 |
| O226 | 0.49281 | 0.04318 | 0.71025 |
| O227 | 0.48621 | 0.86222 | 0.72035 |
| O228 | 0.35691 | 0.44249 | 0.71434 |
| O229 | 0.30855 | 0.425   | 0.89611 |
| O230 | 0.20892 | 0.44568 | 0.02841 |
| O231 | 0.11309 | 0.43038 | 0.89304 |
| O232 | 0.10829 | 0.45114 | 0.69485 |
| O233 | 0.23055 | 0.46504 | 0.7497  |
| O234 | 0.35676 | 0.66097 | 0.72663 |
| O235 | 0.30238 | 0.66955 | 0.90453 |
| O236 | 0.19261 | 0.64501 | 0.01147 |
| O237 | 0.08495 | 0.6718  | 0.90104 |
| O238 | 0.10313 | 0.65851 | 0.70392 |
| O239 | 0.22861 | 0.633   | 0.74978 |
| O240 | 0.31997 | 0.5494  | 0.82268 |
| O241 | 0.08866 | 0.55198 | 0.82225 |
| O242 | 0.43236 | 0.3716  | 0.59087 |
| O243 | 0.41849 | 0.50156 | 0.55977 |
| O244 | 0.41686 | 0.63537 | 0.55322 |
| O245 | 0.19748 | 0.36818 | 0.61695 |
| O246 | 0.19957 | 0.49428 | 0.56114 |
| O247 | 0.18978 | 0.62899 | 0.56    |

|      |         |         |         |
|------|---------|---------|---------|
| O248 | 0.99893 | 0.45647 | 0.80021 |
| O249 | 0.98513 | 0.63269 | 0.78212 |
| O250 | 0.13987 | 0.55615 | 0.22497 |
| O251 | 0.20759 | 0.5641  | 0.39264 |
| O252 | 0.3055  | 0.56752 | 0.52827 |
| O253 | 0.4008  | 0.56607 | 0.389   |
| O254 | 0.40066 | 0.55776 | 0.19344 |
| O255 | 0.27169 | 0.53714 | 0.2264  |
| O256 | 0.1426  | 0.329   | 0.24474 |
| O257 | 0.19642 | 0.33935 | 0.42192 |
| O258 | 0.31123 | 0.35144 | 0.51778 |
| O259 | 0.41692 | 0.3312  | 0.40249 |
| O260 | 0.39932 | 0.33127 | 0.20598 |
| O261 | 0.2743  | 0.34739 | 0.26137 |
| O262 | 0.19075 | 0.44594 | 0.30351 |
| O263 | 0.41094 | 0.44652 | 0.30409 |
| O264 | 0.07201 | 0.6218  | 0.08568 |
| O265 | 0.08752 | 0.49058 | 0.06711 |
| O266 | 0.10873 | 0.35933 | 0.05778 |
| O267 | 0.31256 | 0.62589 | 0.09112 |
| O268 | 0.32902 | 0.49441 | 0.05932 |
| O269 | 0.30815 | 0.36139 | 0.06806 |
| O270 | 0.51176 | 0.53235 | 0.28832 |
| O271 | 0.51634 | 0.36581 | 0.28271 |
| O272 | 0.44244 | 0.74738 | 0.645   |
| O273 | 0.19795 | 0.74611 | 0.65156 |
| O274 | 0.27233 | 0.74834 | 0.05673 |
| O275 | 0.11088 | 0.74689 | 0.05748 |
| O276 | 0.06575 | 0.2471  | 0.13709 |
| O277 | 0.30673 | 0.24246 | 0.14989 |
| O278 | 0.23063 | 0.24814 | 0.55843 |
| O279 | 0.39396 | 0.24816 | 0.55217 |
| O280 | 0.56152 | 0.24946 | 0.35288 |
| O281 | 0.79715 | 0.23959 | 0.32794 |
| O282 | 0.72988 | 0.24243 | 0.95364 |
| O283 | 0.88984 | 0.24459 | 0.93823 |
| O284 | 0.93752 | 0.74616 | 0.85927 |
| O285 | 0.69426 | 0.74821 | 0.853   |
| O286 | 0.76966 | 0.74419 | 0.43548 |
| O287 | 0.60489 | 0.74751 | 0.44744 |
| O288 | 0.95052 | 0.24956 | 0.42125 |
| O289 | 0.90736 | 0.19017 | 0.57239 |
| O290 | 0.88612 | 0.31691 | 0.55427 |
| O291 | 0.00183 | 0.27503 | 0.59712 |

|                                              |         |         |         |
|----------------------------------------------|---------|---------|---------|
| GA29                                         | 0.91881 | 0.40346 | 0.60609 |
| H293                                         | 0.93668 | 0.28489 | 0.37131 |
| H294                                         | 0.84726 | 0.32845 | 0.49964 |
| H295                                         | 0.87589 | 0.16941 | 0.52395 |
| H296                                         | 0.97933 | 0.53551 | 0.5895  |
| H297                                         | 0.99321 | 0.40868 | 0.63288 |
| H298                                         | 0.09301 | 0.53398 | 0.54042 |
| H299                                         | 0.07307 | 0.5497  | 0.41348 |
| H300                                         | 0.97482 | 0.62099 | 0.39878 |
| H301                                         | 0.99984 | 0.6485  | 0.5202  |
| H302                                         | 0.91589 | 0.62404 | 0.4982  |
| H303                                         | 0.96775 | 0.38998 | 0.38847 |
| H304                                         | 0.09013 | 0.43165 | 0.39302 |
| H305                                         | 0.89461 | 0.49193 | 0.43878 |
| H306                                         | 0.07082 | 0.41253 | 0.51807 |
| AL30                                         | 0.81456 | 0.32338 | 0.31082 |
| AL30                                         | 0.80628 | 0.47197 | 0.69871 |
| P309                                         | 0.94316 | 0.25638 | 0.53749 |
| C310                                         | 0.9865  | 0.54091 | 0.50751 |
| C311                                         | 0.05856 | 0.5211  | 0.48041 |
| C312                                         | 0.96801 | 0.61283 | 0.47937 |
| C313                                         | 0.98555 | 0.43446 | 0.42742 |
| C314                                         | 0.94704 | 0.48677 | 0.45557 |
| C315                                         | 0.05692 | 0.44547 | 0.4548  |
| <b>6MR-C<sub>6</sub>H<sub>10</sub>+Ga(H)</b> |         |         |         |
| SI2                                          | 0.4265  | 0.05324 | 0.64283 |
| SI3                                          | 0.30631 | 0.02314 | 0.7854  |
| SI4                                          | 0.28207 | 0.0565  | 0.00792 |
| SI5                                          | 0.12257 | 0.06032 | 0.01059 |
| SI6                                          | 0.07086 | 0.02349 | 0.79867 |
| SI7                                          | 0.18004 | 0.05098 | 0.64971 |
| SI8                                          | 0.42297 | 0.82301 | 0.67123 |
| SI9                                          | 0.30608 | 0.8654  | 0.80893 |
| SI10                                         | 0.26945 | 0.82721 | 0.02968 |
| SI11                                         | 0.11524 | 0.82361 | 0.01802 |
| SI12                                         | 0.06737 | 0.86567 | 0.80318 |
| SI13                                         | 0.18397 | 0.82328 | 0.67232 |
| SI14                                         | 0.07703 | 0.9403  | 0.14985 |
| SI15                                         | 0.19792 | 0.96962 | 0.29301 |
| SI16                                         | 0.21987 | 0.9322  | 0.51277 |
| SI17                                         | 0.37915 | 0.92906 | 0.51434 |
| SI18                                         | 0.43161 | 0.96683 | 0.30563 |
| SI19                                         | 0.32271 | 0.9431  | 0.15446 |



|      |         |         |         |
|------|---------|---------|---------|
| SI20 | 0.08299 | 0.16958 | 0.16376 |
| SI21 | 0.19811 | 0.12624 | 0.30879 |
| SI22 | 0.23425 | 0.16988 | 0.52591 |
| SI23 | 0.38877 | 0.17117 | 0.5105  |
| SI24 | 0.43619 | 0.12403 | 0.30069 |
| SI25 | 0.31918 | 0.16208 | 0.16872 |
| SI26 | 0.57958 | 0.55531 | 0.34466 |
| SI27 | 0.68471 | 0.53093 | 0.18246 |
| SI28 | 0.71746 | 0.55375 | 0.96918 |
| SI29 | 0.87402 | 0.55925 | 0.97506 |
| SI30 | 0.93278 | 0.52497 | 0.1834  |
| SI31 | 0.80887 | 0.55441 | 0.3106  |
| SI32 | 0.58089 | 0.32652 | 0.32532 |
| SI33 | 0.69348 | 0.37316 | 0.18009 |
| SI34 | 0.73127 | 0.32311 | 0.96853 |
| SI35 | 0.88586 | 0.32126 | 0.97461 |
| SI36 | 0.93915 | 0.36644 | 0.18536 |
| SI37 | 0.92696 | 0.43685 | 0.83836 |
| SI38 | 0.77957 | 0.4335  | 0.46903 |
| SI39 | 0.62272 | 0.4311  | 0.48629 |
| SI40 | 0.56715 | 0.46734 | 0.69803 |
| SI41 | 0.68166 | 0.42957 | 0.82682 |
| SI42 | 0.91893 | 0.67028 | 0.82198 |
| SI43 | 0.80575 | 0.6348  | 0.6795  |
| SI44 | 0.76618 | 0.66552 | 0.46081 |
| SI45 | 0.61148 | 0.66938 | 0.48232 |
| SI46 | 0.56748 | 0.62437 | 0.69913 |
| SI47 | 0.68708 | 0.67261 | 0.81585 |
| SI48 | 0.57749 | 0.9397  | 0.36127 |
| SI49 | 0.69407 | 0.96351 | 0.21549 |
| SI50 | 0.7213  | 0.93293 | 0.99462 |
| SI51 | 0.88098 | 0.92946 | 0.99417 |
| SI52 | 0.93246 | 0.96732 | 0.20237 |
| SI53 | 0.82074 | 0.94333 | 0.35294 |
| SI54 | 0.57882 | 0.17086 | 0.33374 |
| SI55 | 0.69619 | 0.11821 | 0.20038 |
| SI56 | 0.73448 | 0.16331 | 0.9811  |
| SI57 | 0.88835 | 0.16767 | 0.98069 |
| SI58 | 0.9384  | 0.12453 | 0.19178 |
| SI59 | 0.81945 | 0.16243 | 0.32518 |
| SI60 | 0.92568 | 0.04822 | 0.85378 |
| SI61 | 0.80253 | 0.02084 | 0.7094  |
| SI62 | 0.78301 | 0.06438 | 0.49162 |
| SI63 | 0.623   | 0.06817 | 0.48968 |

|      |         |         |         |
|------|---------|---------|---------|
| SI64 | 0.57208 | 0.02589 | 0.70018 |
| SI65 | 0.6798  | 0.04901 | 0.85298 |
| SI66 | 0.92191 | 0.82355 | 0.83656 |
| SI67 | 0.80261 | 0.86356 | 0.6915  |
| SI68 | 0.76856 | 0.8221  | 0.47482 |
| SI69 | 0.61412 | 0.8228  | 0.49351 |
| SI70 | 0.56686 | 0.86842 | 0.70335 |
| SI71 | 0.68255 | 0.82687 | 0.83439 |
| SI72 | 0.42425 | 0.44375 | 0.64427 |
| SI73 | 0.30769 | 0.46982 | 0.79794 |
| SI74 | 0.29129 | 0.43003 | 0.01243 |
| SI75 | 0.13274 | 0.43194 | 0.01145 |
| SI76 | 0.07885 | 0.47232 | 0.80378 |
| SI77 | 0.18834 | 0.4446  | 0.65808 |
| SI78 | 0.42845 | 0.66788 | 0.66361 |
| SI79 | 0.30435 | 0.62624 | 0.799   |
| SI80 | 0.27106 | 0.67167 | 0.01286 |
| SI81 | 0.11651 | 0.67114 | 0.01339 |
| SI82 | 0.06631 | 0.62858 | 0.80358 |
| SI83 | 0.18153 | 0.66542 | 0.66535 |
| SI84 | 0.08038 | 0.55205 | 0.14807 |
| SI85 | 0.20514 | 0.52506 | 0.28572 |
| SI86 | 0.23042 | 0.56384 | 0.51167 |
| SI87 | 0.388   | 0.56763 | 0.5071  |
| SI88 | 0.43172 | 0.52599 | 0.29386 |
| SI89 | 0.32911 | 0.55301 | 0.13936 |
| SI90 | 0.0862  | 0.32436 | 0.16183 |
| SI91 | 0.20129 | 0.36536 | 0.30926 |
| SI92 | 0.23461 | 0.32689 | 0.52998 |
| SI93 | 0.38961 | 0.32519 | 0.51608 |
| SI94 | 0.43602 | 0.36914 | 0.2989  |
| SI95 | 0.32147 | 0.31994 | 0.17279 |
| O96  | 0.36182 | 0.05909 | 0.71529 |
| O97  | 0.30459 | 0.06188 | 0.89199 |
| O98  | 0.20201 | 0.04488 | 0.01856 |
| O99  | 0.09946 | 0.06407 | 0.89493 |
| O100 | 0.10575 | 0.05134 | 0.69762 |
| O101 | 0.23286 | 0.02777 | 0.73516 |
| O102 | 0.36208 | 0.82144 | 0.75105 |
| O103 | 0.30688 | 0.84342 | 0.92512 |
| O104 | 0.19183 | 0.85129 | 0.02142 |
| O105 | 0.0883  | 0.82578 | 0.90406 |
| O106 | 0.10679 | 0.8329  | 0.70835 |
| O107 | 0.23268 | 0.8511  | 0.76081 |

|      |         |         |          |
|------|---------|---------|----------|
| O108 | 0.32555 | 0.94436 | 0.79937  |
| O109 | 0.08773 | 0.94417 | 0.81439  |
| O110 | 0.43478 | 0.12232 | 0.57906  |
| O111 | 0.41992 | 0.99057 | 0.56548  |
| O112 | 0.39937 | 0.85879 | 0.56787  |
| O113 | 0.19693 | 0.12609 | 0.61095  |
| O114 | 0.18166 | 0.99766 | 0.55753  |
| O115 | 0.19655 | 0.86366 | 0.56865  |
| O116 | 0.99116 | 0.03474 | 0.7857   |
| O117 | 0.98732 | 0.85842 | 0.78569  |
| O118 | 0.14254 | 0.93602 | 0.22052  |
| O119 | 0.20103 | 0.9257  | 0.39526  |
| O120 | 0.29976 | 0.94281 | 0.52797  |
| O121 | 0.39871 | 0.92405 | 0.39698  |
| O122 | 0.39751 | 0.94444 | 0.20082  |
| O123 | 0.27065 | 0.9687  | 0.23954  |
| O124 | 0.14376 | 0.1668  | 0.2432   |
| O125 | 0.19805 | 0.15975 | 0.41872  |
| O126 | 0.31169 | 0.14532 | 0.51702  |
| O127 | 0.41337 | 0.1703  | 0.39489  |
| O128 | 0.39634 | 0.14773 | 0.20068  |
| O129 | 0.27154 | 0.13321 | 0.25764  |
| O130 | 0.17789 | 0.04724 | 0.31656  |
| O131 | 0.41887 | 0.04627 | 0.32714  |
| O132 | 0.0688  | 0.8698  | 0.08962  |
| O133 | 0.08255 | 0.00109 | 0.06895  |
| O134 | 0.10472 | 0.1322  | 0.06089  |
| O135 | 0.30561 | 0.86676 | 0.12055  |
| O136 | 0.32    | 0.9925  | 0.05781  |
| O137 | 0.30309 | 0.12591 | 0.06293  |
| O138 | 0.51086 | 0.95182 | 0.29518  |
| O139 | 0.51571 | 0.13332 | 0.28051  |
| O140 | 0.63668 | 0.56943 | 0.26144  |
| O141 | 0.67385 | 0.56188 | 0.07131  |
| O142 | 0.79591 | 0.54752 | -0.00161 |
| O143 | 0.91525 | 0.56318 | 0.07934  |
| O144 | 0.88657 | 0.55313 | 0.27461  |
| O145 | 0.76205 | 0.54553 | 0.21354  |
| O146 | 0.64072 | 0.32829 | 0.2446   |
| O147 | 0.68943 | 0.34696 | 0.06547  |
| O148 | 0.80908 | 0.34845 | 0.97519  |
| O149 | 0.91811 | 0.32588 | 0.08524  |
| O150 | 0.90227 | 0.33329 | 0.28177  |
| O151 | 0.76807 | 0.36577 | 0.22224  |

|      |         |         |         |
|------|---------|---------|---------|
| O152 | 0.66833 | 0.45121 | 0.18553 |
| O153 | 0.91887 | 0.44506 | 0.17136 |
| O154 | 0.56667 | 0.62434 | 0.40655 |
| O155 | 0.60151 | 0.49646 | 0.42178 |
| O156 | 0.60366 | 0.36215 | 0.42921 |
| O157 | 0.79684 | 0.62568 | 0.36569 |
| O158 | 0.79162 | 0.49346 | 0.38885 |
| O159 | 0.80545 | 0.36124 | 0.42757 |
| O160 | 0.01112 | 0.53985 | 0.20987 |
| O161 | 0.01973 | 0.3626  | 0.20263 |
| O162 | 0.87767 | 0.42977 | 0.74002 |
| O163 | 0.82506 | 0.44472 | 0.57155 |
| O164 | 0.70296 | 0.4337  | 0.504   |
| O165 | 0.58594 | 0.43052 | 0.59345 |
| O166 | 0.60356 | 0.4323  | 0.79238 |
| O167 | 0.72927 | 0.44282 | 0.7327  |
| O168 | 0.86659 | 0.67741 | 0.73006 |
| O169 | 0.80995 | 0.64616 | 0.55887 |
| O170 | 0.68872 | 0.64324 | 0.47815 |
| O171 | 0.58293 | 0.66226 | 0.59461 |
| O172 | 0.60921 | 0.66014 | 0.7879  |
| O173 | 0.73355 | 0.66426 | 0.71659 |
| O174 | 0.81483 | 0.5574  | 0.70873 |
| O175 | 0.58882 | 0.54601 | 0.69015 |
| O176 | 0.93014 | 0.36608 | 0.89751 |
| O177 | 0.89977 | 0.49559 | 0.91005 |
| O178 | 0.88643 | 0.62864 | 0.91445 |
| O179 | 0.69575 | 0.35481 | 0.8709  |
| O180 | 0.69354 | 0.48576 | 0.91382 |
| O181 | 0.70887 | 0.62029 | 0.9017  |
| O182 | 0.48716 | 0.46058 | 0.716   |
| O183 | 0.48855 | 0.63217 | 0.72624 |
| O184 | 0.64012 | 0.92618 | 0.28683 |
| O185 | 0.6985  | 0.92404 | 0.10991 |
| O186 | 0.80146 | 0.94387 | 0.98391 |
| O187 | 0.90187 | 0.92313 | 0.11087 |
| O188 | 0.8954  | 0.94812 | 0.30636 |
| O189 | 0.76751 | 0.96193 | 0.26612 |
| O190 | 0.64369 | 0.16394 | 0.26222 |
| O191 | 0.69993 | 0.14737 | 0.08785 |
| O192 | 0.81217 | 0.13872 | 0.98417 |
| O193 | 0.91891 | 0.1676  | 0.09289 |
| O194 | 0.89565 | 0.15067 | 0.28663 |
| O195 | 0.76926 | 0.11896 | 0.25387 |

|      |         |         |         |
|------|---------|---------|---------|
| O196 | 0.67027 | 0.04077 | 0.19811 |
| O197 | 0.92176 | 0.04575 | 0.17292 |
| O198 | 0.56658 | 0.87343 | 0.43044 |
| O199 | 0.5899  | 0.0041  | 0.43345 |
| O200 | 0.59341 | 0.13731 | 0.44277 |
| O201 | 0.80823 | 0.8677  | 0.39394 |
| O202 | 0.81444 | 0.99617 | 0.44507 |
| O203 | 0.81716 | 0.13115 | 0.44048 |
| O204 | 0.01132 | 0.95127 | 0.21879 |
| O205 | 0.01765 | 0.13457 | 0.21406 |
| O206 | 0.86047 | 0.04817 | 0.78264 |
| O207 | 0.80064 | 0.06771 | 0.60976 |
| O208 | 0.70322 | 0.06583 | 0.47205 |
| O209 | 0.60585 | 0.06708 | 0.60796 |
| O210 | 0.60523 | 0.0486  | 0.80557 |
| O211 | 0.73111 | 0.02493 | 0.76593 |
| O212 | 0.86031 | 0.83018 | 0.75931 |
| O213 | 0.80446 | 0.82689 | 0.58341 |
| O214 | 0.6915  | 0.84811 | 0.48467 |
| O215 | 0.5908  | 0.82224 | 0.60966 |
| O216 | 0.60527 | 0.84221 | 0.80326 |
| O217 | 0.72986 | 0.85264 | 0.74297 |
| O218 | 0.81662 | 0.94344 | 0.67732 |
| O219 | 0.58526 | 0.94633 | 0.68004 |
| O220 | 0.93319 | 0.12101 | 0.90751 |
| O221 | 0.92086 | 0.9907  | 0.94016 |
| O222 | 0.90188 | 0.85907 | 0.94157 |
| O223 | 0.69618 | 0.1244  | 0.89133 |
| O224 | 0.68339 | 0.99784 | 0.94753 |
| O225 | 0.70006 | 0.8649  | 0.93751 |
| O226 | 0.493   | 0.04234 | 0.70983 |
| O227 | 0.48661 | 0.86191 | 0.72011 |
| O228 | 0.3577  | 0.44318 | 0.71236 |
| O229 | 0.31426 | 0.42269 | 0.89648 |
| O230 | 0.21202 | 0.44737 | 0.02232 |
| O231 | 0.11236 | 0.42957 | 0.89409 |
| O232 | 0.11114 | 0.45418 | 0.69494 |
| O233 | 0.2321  | 0.46276 | 0.75612 |
| O234 | 0.35951 | 0.65816 | 0.72494 |
| O235 | 0.30317 | 0.66993 | 0.9013  |
| O236 | 0.19387 | 0.64523 | 0.00929 |
| O237 | 0.08577 | 0.67284 | 0.90109 |
| O238 | 0.10493 | 0.6566  | 0.70475 |
| O239 | 0.23111 | 0.63017 | 0.74642 |

|      |         |         |         |
|------|---------|---------|---------|
| O240 | 0.32189 | 0.5483  | 0.82523 |
| O241 | 0.08874 | 0.55174 | 0.82656 |
| O242 | 0.43358 | 0.37053 | 0.59259 |
| O243 | 0.41891 | 0.49947 | 0.55553 |
| O244 | 0.42396 | 0.63355 | 0.55347 |
| O245 | 0.19887 | 0.36806 | 0.6201  |
| O246 | 0.20811 | 0.49397 | 0.56589 |
| O247 | 0.18955 | 0.62745 | 0.55813 |
| O248 | 1.00011 | 0.45556 | 0.79674 |
| O249 | 0.98646 | 0.63254 | 0.78247 |
| O250 | 0.14202 | 0.55836 | 0.22689 |
| O251 | 0.21654 | 0.5617  | 0.39261 |
| O252 | 0.30925 | 0.5733  | 0.53322 |
| O253 | 0.40015 | 0.56655 | 0.38797 |
| O254 | 0.40141 | 0.55892 | 0.19286 |
| O255 | 0.27236 | 0.53486 | 0.22132 |
| O256 | 0.14247 | 0.32714 | 0.24889 |
| O257 | 0.19673 | 0.34184 | 0.42488 |
| O258 | 0.31221 | 0.35075 | 0.51937 |
| O259 | 0.41787 | 0.33221 | 0.40337 |
| O260 | 0.39862 | 0.3307  | 0.20719 |
| O261 | 0.274   | 0.34695 | 0.26325 |
| O262 | 0.18946 | 0.44586 | 0.30169 |
| O263 | 0.41124 | 0.447   | 0.30278 |
| O264 | 0.07377 | 0.62162 | 0.08535 |
| O265 | 0.09141 | 0.49049 | 0.06958 |
| O266 | 0.11437 | 0.35963 | 0.06043 |
| O267 | 0.31378 | 0.62437 | 0.08693 |
| O268 | 0.33317 | 0.49243 | 0.05861 |
| O269 | 0.30715 | 0.36021 | 0.0696  |
| O270 | 0.51183 | 0.53345 | 0.28808 |
| O271 | 0.51596 | 0.36539 | 0.27988 |
| O272 | 0.44404 | 0.74655 | 0.64567 |
| O273 | 0.19903 | 0.74433 | 0.65111 |
| O274 | 0.27419 | 0.74777 | 0.05512 |
| O275 | 0.1121  | 0.74671 | 0.05854 |
| O276 | 0.06759 | 0.24726 | 0.13595 |
| O277 | 0.30624 | 0.24152 | 0.15209 |
| O278 | 0.23047 | 0.24808 | 0.55838 |
| O279 | 0.39512 | 0.24753 | 0.55193 |
| O280 | 0.56154 | 0.24937 | 0.35119 |
| O281 | 0.79894 | 0.23959 | 0.32803 |
| O282 | 0.72962 | 0.2424  | 0.9574  |
| O283 | 0.88916 | 0.2438  | 0.93737 |

|                                                    |         |         |         |
|----------------------------------------------------|---------|---------|---------|
| O284                                               | 0.9376  | 0.74523 | 0.86087 |
| O285                                               | 0.69492 | 0.74821 | 0.8584  |
| O286                                               | 0.77114 | 0.74506 | 0.43594 |
| O287                                               | 0.60676 | 0.74751 | 0.44829 |
| O288                                               | 0.95263 | 0.25115 | 0.4193  |
| O289                                               | 0.90862 | 0.19234 | 0.57075 |
| O290                                               | 0.88717 | 0.31885 | 0.55058 |
| O291                                               | 0.00289 | 0.27715 | 0.59551 |
| GA29                                               | 0.91794 | 0.40732 | 0.60065 |
| H293                                               | 0.93872 | 0.2862  | 0.36895 |
| H294                                               | 0.84888 | 0.32918 | 0.49647 |
| H295                                               | 0.8767  | 0.17139 | 0.52313 |
| H296                                               | 0.97223 | 0.53301 | 0.60265 |
| H297                                               | 0.99194 | 0.4076  | 0.63198 |
| H298                                               | 0.11491 | 0.52538 | 0.50743 |
| H299                                               | 0.09454 | 0.52957 | 0.37955 |
| H300                                               | 0.00783 | 0.6003  | 0.40519 |
| H301                                               | 0.04524 | 0.61504 | 0.52302 |
| H302                                               | 0.92035 | 0.58612 | 0.53044 |
| H303                                               | 0.96191 | 0.40234 | 0.3804  |
| H304                                               | 0.08174 | 0.41437 | 0.41052 |
| H305                                               | 0.88686 | 0.49    | 0.43443 |
| H306                                               | 0.05645 | 0.42698 | 0.53464 |
| AL30                                               | 0.81587 | 0.32319 | 0.30766 |
| AL30                                               | 0.80451 | 0.47286 | 0.69571 |
| P309                                               | 0.9445  | 0.25842 | 0.53539 |
| C310                                               | 0.9598  | 0.54801 | 0.52514 |
| C311                                               | 0.07438 | 0.52081 | 0.45407 |
| C312                                               | 0.02292 | 0.57601 | 0.47544 |
| C313                                               | 0.97983 | 0.44203 | 0.42979 |
| C314                                               | 0.9368  | 0.4893  | 0.46405 |
| C315                                               | 0.05071 | 0.44686 | 0.45763 |
| <b>C<sub>6</sub>H<sub>9</sub>Ga+H<sub>2</sub>*</b> |         |         |         |
| SI2                                                | 0.42534 | 0.0526  | 0.64159 |
| SI3                                                | 0.30566 | 0.02051 | 0.78351 |
| SI4                                                | 0.28202 | 0.04814 | 0.00789 |
| SI5                                                | 0.12299 | 0.055   | 0.00935 |
| SI6                                                | 0.07025 | 0.0215  | 0.79777 |
| SI7                                                | 0.17915 | 0.05    | 0.64871 |
| SI8                                                | 0.42262 | 0.82058 | 0.67345 |
| SI9                                                | 0.30535 | 0.86263 | 0.80872 |
| SI10                                               | 0.2706  | 0.82349 | 0.03114 |
| SI11                                               | 0.11585 | 0.82035 | 0.02197 |

|      |         |         |         |
|------|---------|---------|---------|
| SI12 | 0.06669 | 0.86294 | 0.80598 |
| SI13 | 0.18231 | 0.8202  | 0.67339 |
| SI14 | 0.0766  | 0.93803 | 0.15092 |
| SI15 | 0.19941 | 0.96796 | 0.29326 |
| SI16 | 0.21846 | 0.92987 | 0.51365 |
| SI17 | 0.37797 | 0.92738 | 0.51557 |
| SI18 | 0.43289 | 0.96214 | 0.30786 |
| SI19 | 0.32437 | 0.93705 | 0.15582 |
| SI20 | 0.0855  | 0.16732 | 0.16088 |
| SI21 | 0.20109 | 0.12623 | 0.30739 |
| SI22 | 0.2337  | 0.16959 | 0.52451 |
| SI23 | 0.38866 | 0.1701  | 0.50744 |
| SI24 | 0.43875 | 0.11935 | 0.30045 |
| SI25 | 0.32323 | 0.1569  | 0.16519 |
| SI26 | 0.57945 | 0.55943 | 0.33646 |
| SI27 | 0.68796 | 0.53278 | 0.17908 |
| SI28 | 0.7143  | 0.55001 | 0.96059 |
| SI29 | 0.87173 | 0.5554  | 0.97174 |
| SI30 | 0.92739 | 0.52189 | 0.1835  |
| SI31 | 0.8085  | 0.55443 | 0.31101 |
| SI32 | 0.5737  | 0.32603 | 0.32306 |
| SI33 | 0.6944  | 0.37403 | 0.1882  |
| SI34 | 0.72397 | 0.32051 | 0.97381 |
| SI35 | 0.87683 | 0.32001 | 0.97462 |
| SI36 | 0.93269 | 0.36361 | 0.18261 |
| SI37 | 0.92365 | 0.43356 | 0.83792 |
| SI38 | 0.77029 | 0.43719 | 0.46739 |
| SI39 | 0.61209 | 0.43228 | 0.47722 |
| SI40 | 0.5631  | 0.46837 | 0.69686 |
| SI41 | 0.67217 | 0.42367 | 0.82958 |
| SI42 | 0.91391 | 0.6719  | 0.82722 |
| SI43 | 0.80021 | 0.63133 | 0.68494 |
| SI44 | 0.76631 | 0.66161 | 0.46597 |
| SI45 | 0.61141 | 0.66789 | 0.48263 |
| SI46 | 0.56555 | 0.62436 | 0.70186 |
| SI47 | 0.68469 | 0.67422 | 0.81583 |
| SI48 | 0.57921 | 0.93739 | 0.36558 |
| SI49 | 0.69599 | 0.96186 | 0.22195 |
| SI50 | 0.7216  | 0.93414 | 0.9979  |
| SI51 | 0.88065 | 0.93318 | 1.00006 |
| SI52 | 0.93241 | 0.96824 | 0.20925 |
| SI53 | 0.82242 | 0.94044 | 0.36014 |
| SI54 | 0.58038 | 0.16968 | 0.33536 |
| SI55 | 0.69857 | 0.11732 | 0.20514 |



|      |         |         |         |
|------|---------|---------|---------|
| SI56 | 0.73239 | 0.16046 | 0.98372 |
| SI57 | 0.8858  | 0.16673 | 0.98012 |
| SI58 | 0.93886 | 0.12652 | 0.19359 |
| SI59 | 0.82207 | 0.16348 | 0.32958 |
| SI60 | 0.92527 | 0.04816 | 0.85572 |
| SI61 | 0.80103 | 0.02061 | 0.71072 |
| SI62 | 0.78483 | 0.06384 | 0.49425 |
| SI63 | 0.62433 | 0.06759 | 0.49104 |
| SI64 | 0.57087 | 0.02433 | 0.7005  |
| SI65 | 0.67765 | 0.04829 | 0.85402 |
| SI66 | 0.9191  | 0.8252  | 0.84442 |
| SI67 | 0.80064 | 0.86401 | 0.69538 |
| SI68 | 0.77101 | 0.81914 | 0.48175 |
| SI69 | 0.61704 | 0.82178 | 0.50128 |
| SI70 | 0.56706 | 0.86664 | 0.70878 |
| SI71 | 0.68232 | 0.82701 | 0.84007 |
| SI72 | 0.41896 | 0.44208 | 0.64084 |
| SI73 | 0.3072  | 0.46608 | 0.80101 |
| SI74 | 0.28431 | 0.42765 | 0.01434 |
| SI75 | 0.12827 | 0.43047 | 0.00473 |
| SI76 | 0.07163 | 0.4664  | 0.79667 |
| SI77 | 0.1893  | 0.44359 | 0.66082 |
| SI78 | 0.42693 | 0.66582 | 0.66245 |
| SI79 | 0.30145 | 0.62274 | 0.79281 |
| SI80 | 0.2716  | 0.66804 | 0.00755 |
| SI81 | 0.11811 | 0.66641 | 0.01683 |
| SI82 | 0.06344 | 0.62641 | 0.80462 |
| SI83 | 0.17846 | 0.66178 | 0.66161 |
| SI84 | 0.07615 | 0.54607 | 0.14631 |
| SI85 | 0.20434 | 0.5209  | 0.28202 |
| SI86 | 0.22674 | 0.56333 | 0.5087  |
| SI87 | 0.38476 | 0.56778 | 0.5023  |
| SI88 | 0.43392 | 0.5273  | 0.28961 |
| SI89 | 0.32632 | 0.55306 | 0.13972 |
| SI90 | 0.08442 | 0.32314 | 0.15503 |
| SI91 | 0.19967 | 0.35947 | 0.30511 |
| SI92 | 0.23394 | 0.32673 | 0.52665 |
| SI93 | 0.38927 | 0.32449 | 0.50846 |
| SI94 | 0.43282 | 0.36858 | 0.28969 |
| SI95 | 0.31468 | 0.31306 | 0.16571 |
| O96  | 0.36082 | 0.058   | 0.71463 |
| O97  | 0.30478 | 0.05594 | 0.89246 |
| O98  | 0.20182 | 0.03655 | 0.01743 |
| O99  | 0.10039 | 0.06121 | 0.89368 |

|      |         |          |         |
|------|---------|----------|---------|
| O100 | 0.10464 | 0.05027  | 0.69664 |
| O101 | 0.23189 | 0.02765  | 0.73469 |
| O102 | 0.36209 | 0.8178   | 0.75401 |
| O103 | 0.30561 | 0.84395  | 0.92625 |
| O104 | 0.19266 | 0.84706  | 0.02783 |
| O105 | 0.08974 | 0.82517  | 0.90767 |
| O106 | 0.10545 | 0.82979  | 0.7109  |
| O107 | 0.23206 | 0.84685  | 0.76128 |
| O108 | 0.32436 | 0.9413   | 0.79294 |
| O109 | 0.08602 | 0.94198  | 0.81222 |
| O110 | 0.43373 | 0.12196  | 0.57849 |
| O111 | 0.41807 | 0.99045  | 0.56351 |
| O112 | 0.39894 | 0.85856  | 0.57206 |
| O113 | 0.1958  | 0.125    | 0.60846 |
| O114 | 0.18056 | 0.9958   | 0.55774 |
| O115 | 0.19453 | 0.86161  | 0.5702  |
| O116 | 0.99045 | 0.0338   | 0.78712 |
| O117 | 0.98672 | 0.8537   | 0.7914  |
| O118 | 0.14262 | 0.9372   | 0.22066 |
| O119 | 0.19991 | 0.92405  | 0.39581 |
| O120 | 0.29837 | 0.94019  | 0.52898 |
| O121 | 0.39741 | 0.92042  | 0.39827 |
| O122 | 0.39913 | 0.94069  | 0.2022  |
| O123 | 0.2721  | 0.96344  | 0.24012 |
| O124 | 0.14581 | 0.16471  | 0.24086 |
| O125 | 0.19774 | 0.15988  | 0.4171  |
| O126 | 0.31119 | 0.14543  | 0.51588 |
| O127 | 0.4133  | 0.16675  | 0.39194 |
| O128 | 0.39959 | 0.13967  | 0.19818 |
| O129 | 0.27468 | 0.1372   | 0.2586  |
| O130 | 0.18361 | 0.04665  | 0.31581 |
| O131 | 0.42245 | 0.04185  | 0.32947 |
| O132 | 0.06955 | 0.86551  | 0.09554 |
| O133 | 0.08087 | -0.00381 | 0.06541 |
| O134 | 0.10688 | 0.12696  | 0.06062 |
| O135 | 0.30814 | 0.86008  | 0.12376 |
| O136 | 0.32013 | 0.98387  | 0.05641 |
| O137 | 0.30286 | 0.11615  | 0.06549 |
| O138 | 0.51182 | 0.94519  | 0.29956 |
| O139 | 0.51832 | 0.1301   | 0.28219 |
| O140 | 0.63926 | 0.57155  | 0.25706 |
| O141 | 0.67717 | 0.56213  | 0.06731 |
| O142 | 0.79371 | 0.53474  | -0.023  |
| O143 | 0.90416 | 0.56052  | 0.08224 |

|      |         |         |         |
|------|---------|---------|---------|
| O144 | 0.88678 | 0.55019 | 0.27989 |
| O145 | 0.76498 | 0.54975 | 0.20918 |
| O146 | 0.64148 | 0.33427 | 0.25933 |
| O147 | 0.68861 | 0.34163 | 0.07744 |
| O148 | 0.80094 | 0.34889 | 0.96603 |
| O149 | 0.90158 | 0.322   | 0.0894  |
| O150 | 0.90357 | 0.3324  | 0.28613 |
| O151 | 0.76904 | 0.36582 | 0.22974 |
| O152 | 0.67235 | 0.45289 | 0.1842  |
| O153 | 0.91295 | 0.44227 | 0.16907 |
| O154 | 0.56756 | 0.62834 | 0.39906 |
| O155 | 0.59584 | 0.49998 | 0.41526 |
| O156 | 0.57731 | 0.36676 | 0.42828 |
| O157 | 0.79709 | 0.62497 | 0.36829 |
| O158 | 0.78644 | 0.49228 | 0.38249 |
| O159 | 0.80524 | 0.36433 | 0.4317  |
| O160 | 0.00596 | 0.53642 | 0.20427 |
| O161 | 0.01354 | 0.35818 | 0.17963 |
| O162 | 0.8721  | 0.42772 | 0.74165 |
| O163 | 0.80475 | 0.45525 | 0.57102 |
| O164 | 0.692   | 0.42188 | 0.47636 |
| O165 | 0.58444 | 0.43831 | 0.5894  |
| O166 | 0.59596 | 0.42522 | 0.78634 |
| O167 | 0.72608 | 0.43047 | 0.74221 |
| O168 | 0.86233 | 0.67349 | 0.73395 |
| O169 | 0.80823 | 0.63731 | 0.56365 |
| O170 | 0.68817 | 0.64033 | 0.48035 |
| O171 | 0.57977 | 0.65579 | 0.59223 |
| O172 | 0.60651 | 0.6654  | 0.78644 |
| O173 | 0.7301  | 0.66882 | 0.71491 |
| O174 | 0.79992 | 0.55486 | 0.72373 |
| O175 | 0.58798 | 0.54608 | 0.70436 |
| O176 | 0.92509 | 0.36544 | 0.90325 |
| O177 | 0.91135 | 0.49759 | 0.90821 |
| O178 | 0.88348 | 0.62696 | 0.91753 |
| O179 | 0.67983 | 0.35098 | 0.88391 |
| O180 | 0.67989 | 0.48502 | 0.91006 |
| O181 | 0.707   | 0.61832 | 0.8964  |
| O182 | 0.48242 | 0.46428 | 0.70791 |
| O183 | 0.48647 | 0.63202 | 0.72821 |
| O184 | 0.64155 | 0.923   | 0.2908  |
| O185 | 0.6994  | 0.92601 | 0.11347 |
| O186 | 0.80139 | 0.94788 | 0.98654 |
| O187 | 0.89948 | 0.92641 | 0.11728 |

|      |         |         |         |
|------|---------|---------|---------|
| O188 | 0.89724 | 0.94691 | 0.31387 |
| O189 | 0.76947 | 0.95768 | 0.27212 |
| O190 | 0.64626 | 0.16431 | 0.26542 |
| O191 | 0.69884 | 0.14155 | 0.08991 |
| O192 | 0.81032 | 0.13601 | 0.98444 |
| O193 | 0.91814 | 0.16536 | 0.09126 |
| O194 | 0.89873 | 0.15787 | 0.2879  |
| O195 | 0.77309 | 0.12197 | 0.25321 |
| O196 | 0.67315 | 0.03985 | 0.21083 |
| O197 | 0.9213  | 0.04726 | 0.18442 |
| O198 | 0.56967 | 0.87357 | 0.44006 |
| O199 | 0.59112 | 0.00452 | 0.43224 |
| O200 | 0.59506 | 0.13727 | 0.44514 |
| O201 | 0.81141 | 0.86441 | 0.401   |
| O202 | 0.81437 | 0.99333 | 0.45184 |
| O203 | 0.82076 | 0.1276  | 0.44028 |
| O204 | 0.01146 | 0.95094 | 0.22027 |
| O205 | 0.01872 | 0.13587 | 0.21179 |
| O206 | 0.85987 | 0.04397 | 0.78543 |
| O207 | 0.8022  | 0.06931 | 0.61289 |
| O208 | 0.70474 | 0.06572 | 0.47545 |
| O209 | 0.60579 | 0.06503 | 0.60886 |
| O210 | 0.60316 | 0.04717 | 0.80647 |
| O211 | 0.72969 | 0.02593 | 0.767   |
| O212 | 0.85821 | 0.83592 | 0.76777 |
| O213 | 0.80646 | 0.82376 | 0.59068 |
| O214 | 0.69441 | 0.84669 | 0.49124 |
| O215 | 0.59396 | 0.81969 | 0.61763 |
| O216 | 0.60479 | 0.84374 | 0.81119 |
| O217 | 0.7279  | 0.85213 | 0.74622 |
| O218 | 0.81176 | 0.94361 | 0.67472 |
| O219 | 0.58331 | 0.94454 | 0.68179 |
| O220 | 0.93129 | 0.12291 | 0.90367 |
| O221 | 0.92178 | 0.99428 | 0.94728 |
| O222 | 0.90307 | 0.86302 | 0.9488  |
| O223 | 0.6933  | 0.12369 | 0.89287 |
| O224 | 0.68157 | 0.99685 | 0.94824 |
| O225 | 0.70266 | 0.86479 | 0.94234 |
| O226 | 0.49179 | 0.04117 | 0.70831 |
| O227 | 0.48688 | 0.85764 | 0.72353 |
| O228 | 0.35541 | 0.43605 | 0.71523 |
| O229 | 0.31689 | 0.423   | 0.90313 |
| O230 | 0.20655 | 0.4517  | 0.00655 |
| O231 | 0.10156 | 0.42464 | 0.89028 |

|      |         |         |         |
|------|---------|---------|---------|
| O232 | 0.11105 | 0.45221 | 0.69289 |
| O233 | 0.23059 | 0.45671 | 0.76325 |
| O234 | 0.3569  | 0.65579 | 0.72069 |
| O235 | 0.2954  | 0.66937 | 0.89164 |
| O236 | 0.19528 | 0.64036 | 0.01782 |
| O237 | 0.09172 | 0.66511 | 0.9022  |
| O238 | 0.1032  | 0.65023 | 0.70458 |
| O239 | 0.2294  | 0.62269 | 0.73674 |
| O240 | 0.32116 | 0.54571 | 0.82193 |
| O241 | 0.07168 | 0.54585 | 0.82242 |
| O242 | 0.43212 | 0.37045 | 0.58582 |
| O243 | 0.40504 | 0.49692 | 0.5536  |
| O244 | 0.42404 | 0.62983 | 0.5537  |
| O245 | 0.20044 | 0.36827 | 0.61819 |
| O246 | 0.21113 | 0.49661 | 0.57496 |
| O247 | 0.18538 | 0.62801 | 0.55118 |
| O248 | 0.99464 | 0.44018 | 0.77607 |
| O249 | 0.98561 | 0.64386 | 0.78839 |
| O250 | 0.13524 | 0.54341 | 0.22878 |
| O251 | 0.20502 | 0.55038 | 0.3943  |
| O252 | 0.30541 | 0.58029 | 0.5156  |
| O253 | 0.40505 | 0.56693 | 0.38599 |
| O254 | 0.39875 | 0.5586  | 0.19159 |
| O255 | 0.26704 | 0.55285 | 0.22256 |
| O256 | 0.13126 | 0.33339 | 0.25306 |
| O257 | 0.19397 | 0.3433  | 0.42356 |
| O258 | 0.31151 | 0.34908 | 0.51208 |
| O259 | 0.41595 | 0.33099 | 0.39455 |
| O260 | 0.38814 | 0.33853 | 0.19909 |
| O261 | 0.26382 | 0.31998 | 0.2602  |
| O262 | 0.21023 | 0.43933 | 0.28338 |
| O263 | 0.41658 | 0.44803 | 0.30228 |
| O264 | 0.0746  | 0.61809 | 0.08912 |
| O265 | 0.08481 | 0.48705 | 0.06296 |
| O266 | 0.11872 | 0.35778 | 0.05764 |
| O267 | 0.32001 | 0.61826 | 0.06871 |
| O268 | 0.32515 | 0.48349 | 0.07701 |
| O269 | 0.28878 | 0.35522 | 0.06918 |
| O270 | 0.51302 | 0.53925 | 0.27482 |
| O271 | 0.51046 | 0.35568 | 0.25979 |
| O272 | 0.44211 | 0.74447 | 0.64319 |
| O273 | 0.19603 | 0.74099 | 0.65245 |
| O274 | 0.27657 | 0.74351 | 0.05165 |
| O275 | 0.11189 | 0.74265 | 0.05858 |

|                                     |          |         |         |
|-------------------------------------|----------|---------|---------|
| O276                                | 0.07289  | 0.24477 | 0.12928 |
| O277                                | 0.31688  | 0.23502 | 0.13406 |
| O278                                | 0.22877  | 0.24798 | 0.55634 |
| O279                                | 0.39593  | 0.24715 | 0.54526 |
| O280                                | 0.56099  | 0.2478  | 0.35043 |
| O281                                | 0.79944  | 0.23996 | 0.33929 |
| O282                                | 0.72676  | 0.23984 | 0.96373 |
| O283                                | 0.88335  | 0.24291 | 0.93688 |
| O284                                | 0.9264   | 0.74647 | 0.87157 |
| O285                                | 0.69397  | 0.74817 | 0.86422 |
| O286                                | 0.77277  | 0.74167 | 0.44552 |
| O287                                | 0.60905  | 0.74712 | 0.45481 |
| O288                                | 0.96143  | 0.27072 | 0.44643 |
| O289                                | 0.94147  | 0.21897 | 0.61166 |
| O290                                | 0.87898  | 0.33036 | 0.56708 |
| O291                                | -0.00536 | 0.33449 | 0.61371 |
| GA29                                | 0.93276  | 0.41445 | 0.62136 |
| H293                                | 0.94578  | 0.29994 | 0.38933 |
| H294                                | 0.83521  | 0.3449  | 0.49117 |
| H295                                | 0.91851  | 0.18401 | 0.57326 |
| H296                                | 0.94343  | 0.55522 | 0.7052  |
| H297                                | 0.90709  | 0.54693 | 0.7057  |
| H298                                | 0.10675  | 0.54663 | 0.51765 |
| H299                                | 0.05872  | 0.55534 | 0.4084  |
| H300                                | -0.0152  | 0.59052 | 0.53637 |
| H301                                | 0.01928  | 0.5349  | 0.62322 |
| H302                                | 0.89675  | 0.5158  | 0.52879 |
| H303                                | 1.01713  | 0.39805 | 0.33245 |
| H304                                | 0.11724  | 0.44457 | 0.40797 |
| H305                                | 0.90606  | 0.43622 | 0.39061 |
| H306                                | 0.07867  | 0.4223  | 0.52095 |
| AL30                                | 0.81745  | 0.32216 | 0.31275 |
| AL30                                | 0.79531  | 0.46978 | 0.69765 |
| P309                                | 0.94515  | 0.28922 | 0.55755 |
| C310                                | 0.94501  | 0.49043 | 0.523   |
| C311                                | 0.06339  | 0.52691 | 0.47838 |
| C312                                | 0.00309  | 0.53868 | 0.54505 |
| C313                                | 1.01151  | 0.42948 | 0.39816 |
| C314                                | 0.95142  | 0.45038 | 0.42989 |
| C315                                | 0.07215  | 0.45259 | 0.45242 |
| <b>C<sub>6</sub>H<sub>9</sub>Ga</b> |          |         |         |
| SI2                                 | 0.42584  | 0.05274 | 0.64216 |
| SI3                                 | 0.30521  | 0.02004 | 0.78165 |

|      |         |         |         |
|------|---------|---------|---------|
| SI4  | 0.28271 | 0.0489  | 0.00733 |
| SI5  | 0.12321 | 0.05713 | 0.00909 |
| SI6  | 0.07093 | 0.02309 | 0.79689 |
| SI7  | 0.17882 | 0.04962 | 0.64581 |
| SI8  | 0.42183 | 0.81974 | 0.67134 |
| SI9  | 0.30507 | 0.86236 | 0.80728 |
| SI10 | 0.26996 | 0.82362 | 0.02888 |
| SI11 | 0.11528 | 0.82131 | 0.01833 |
| SI12 | 0.06606 | 0.86473 | 0.80302 |
| SI13 | 0.18197 | 0.82052 | 0.67297 |
| SI14 | 0.07715 | 0.93868 | 0.14907 |
| SI15 | 0.19947 | 0.96721 | 0.29265 |
| SI16 | 0.21877 | 0.92919 | 0.51236 |
| SI17 | 0.37817 | 0.92821 | 0.51474 |
| SI18 | 0.43271 | 0.96207 | 0.30584 |
| SI19 | 0.32382 | 0.93658 | 0.15467 |
| SI20 | 0.08455 | 0.16721 | 0.16131 |
| SI21 | 0.2021  | 0.12475 | 0.30476 |
| SI22 | 0.23451 | 0.1694  | 0.52177 |
| SI23 | 0.38963 | 0.16997 | 0.50743 |
| SI24 | 0.43983 | 0.1195  | 0.29974 |
| SI25 | 0.32463 | 0.15658 | 0.16372 |
| SI26 | 0.57762 | 0.55935 | 0.33611 |
| SI27 | 0.68836 | 0.53123 | 0.17983 |
| SI28 | 0.71212 | 0.55117 | 0.96322 |
| SI29 | 0.86976 | 0.55703 | 0.96989 |
| SI30 | 0.92687 | 0.5243  | 0.18159 |
| SI31 | 0.80914 | 0.55568 | 0.31017 |
| SI32 | 0.57348 | 0.32495 | 0.32194 |
| SI33 | 0.69476 | 0.37265 | 0.18735 |
| SI34 | 0.72456 | 0.31922 | 0.97278 |
| SI35 | 0.87821 | 0.32002 | 0.97594 |
| SI36 | 0.93253 | 0.36593 | 0.18425 |
| SI37 | 0.92332 | 0.4344  | 0.83848 |
| SI38 | 0.76902 | 0.43817 | 0.46547 |
| SI39 | 0.61009 | 0.43244 | 0.47481 |
| SI40 | 0.56464 | 0.46799 | 0.69513 |
| SI41 | 0.67179 | 0.42567 | 0.83351 |
| SI42 | 0.91468 | 0.66928 | 0.82227 |
| SI43 | 0.80319 | 0.6302  | 0.68197 |
| SI44 | 0.76583 | 0.66187 | 0.46465 |
| SI45 | 0.61112 | 0.66847 | 0.47977 |
| SI46 | 0.5651  | 0.62429 | 0.69803 |
| SI47 | 0.68474 | 0.67272 | 0.8121  |

|      |         |         |         |
|------|---------|---------|---------|
| SI48 | 0.57884 | 0.93762 | 0.36421 |
| SI49 | 0.69684 | 0.96182 | 0.22151 |
| SI50 | 0.7224  | 0.93086 | 0.99797 |
| SI51 | 0.88195 | 0.92843 | 0.99785 |
| SI52 | 0.93277 | 0.96736 | 0.20726 |
| SI53 | 0.82338 | 0.94008 | 0.35999 |
| SI54 | 0.58165 | 0.16879 | 0.33587 |
| SI55 | 0.69954 | 0.11745 | 0.20395 |
| SI56 | 0.73293 | 0.16005 | 0.98236 |
| SI57 | 0.8869  | 0.16678 | 0.98488 |
| SI58 | 0.93886 | 0.12531 | 0.19675 |
| SI59 | 0.82228 | 0.16271 | 0.33105 |
| SI60 | 0.92611 | 0.04809 | 0.8582  |
| SI61 | 0.80368 | 0.02065 | 0.71347 |
| SI62 | 0.78505 | 0.06224 | 0.49545 |
| SI63 | 0.62453 | 0.06629 | 0.49142 |
| SI64 | 0.57093 | 0.02312 | 0.70079 |
| SI65 | 0.67914 | 0.04563 | 0.85401 |
| SI66 | 0.92142 | 0.82213 | 0.84268 |
| SI67 | 0.80269 | 0.86431 | 0.6986  |
| SI68 | 0.77098 | 0.82005 | 0.48303 |
| SI69 | 0.61705 | 0.82209 | 0.49985 |
| SI70 | 0.56648 | 0.86528 | 0.70755 |
| SI71 | 0.68267 | 0.82668 | 0.83863 |
| SI72 | 0.41899 | 0.44146 | 0.64123 |
| SI73 | 0.30798 | 0.46574 | 0.80258 |
| SI74 | 0.28258 | 0.42753 | 0.01616 |
| SI75 | 0.12675 | 0.42927 | 0.00552 |
| SI76 | 0.07245 | 0.4652  | 0.79784 |
| SI77 | 0.18999 | 0.44273 | 0.66225 |
| SI78 | 0.42611 | 0.66492 | 0.65875 |
| SI79 | 0.3021  | 0.62266 | 0.79236 |
| SI80 | 0.27006 | 0.66851 | 0.0039  |
| SI81 | 0.11543 | 0.66762 | 0.01104 |
| SI82 | 0.06104 | 0.62327 | 0.80277 |
| SI83 | 0.17775 | 0.66173 | 0.66442 |
| SI84 | 0.07583 | 0.5468  | 0.14414 |
| SI85 | 0.20226 | 0.52157 | 0.28419 |
| SI86 | 0.22537 | 0.56302 | 0.50942 |
| SI87 | 0.38385 | 0.56617 | 0.50011 |
| SI88 | 0.43414 | 0.52761 | 0.28536 |
| SI89 | 0.32332 | 0.55361 | 0.1423  |
| SI90 | 0.08332 | 0.32357 | 0.15857 |
| SI91 | 0.19868 | 0.36029 | 0.30729 |



|      |         |          |         |
|------|---------|----------|---------|
| SI92 | 0.23434 | 0.3266   | 0.52696 |
| SI93 | 0.38972 | 0.32466  | 0.50705 |
| SI94 | 0.43314 | 0.3679   | 0.28675 |
| SI95 | 0.31296 | 0.31277  | 0.16682 |
| O96  | 0.36109 | 0.05803  | 0.71471 |
| O97  | 0.30287 | 0.05491  | 0.89077 |
| O98  | 0.20237 | 0.04145  | 0.02174 |
| O99  | 0.10294 | 0.06184  | 0.89234 |
| O100 | 0.10467 | 0.05144  | 0.69498 |
| O101 | 0.23202 | 0.02736  | 0.73118 |
| O102 | 0.3609  | 0.817    | 0.7513  |
| O103 | 0.3064  | 0.84375  | 0.92489 |
| O104 | 0.19224 | 0.84778  | 0.02337 |
| O105 | 0.08863 | 0.82621  | 0.90433 |
| O106 | 0.10476 | 0.83179  | 0.70771 |
| O107 | 0.23108 | 0.8472   | 0.76174 |
| O108 | 0.32433 | 0.9409   | 0.79075 |
| O109 | 0.08612 | 0.94344  | 0.81054 |
| O110 | 0.43445 | 0.12233  | 0.57961 |
| O111 | 0.41848 | 0.99096  | 0.56333 |
| O112 | 0.39893 | 0.85917  | 0.57083 |
| O113 | 0.19562 | 0.12407  | 0.60369 |
| O114 | 0.17932 | 0.9943   | 0.55627 |
| O115 | 0.19635 | 0.86047  | 0.5691  |
| O116 | 0.99119 | 0.03643  | 0.7881  |
| O117 | 0.9859  | 0.85656  | 0.78833 |
| O118 | 0.14303 | 0.93677  | 0.2191  |
| O119 | 0.20013 | 0.92267  | 0.39461 |
| O120 | 0.2985  | 0.94132  | 0.52751 |
| O121 | 0.39774 | 0.92127  | 0.39753 |
| O122 | 0.39874 | 0.93968  | 0.20068 |
| O123 | 0.27222 | 0.96329  | 0.23964 |
| O124 | 0.147   | 0.16293  | 0.23743 |
| O125 | 0.20015 | 0.16075  | 0.41296 |
| O126 | 0.31212 | 0.14535  | 0.51544 |
| O127 | 0.41475 | 0.16597  | 0.39235 |
| O128 | 0.4014  | 0.14276  | 0.19825 |
| O129 | 0.27563 | 0.1327   | 0.25445 |
| O130 | 0.18334 | 0.04566  | 0.31689 |
| O131 | 0.42191 | 0.04192  | 0.32561 |
| O132 | 0.0696  | 0.86673  | 0.09233 |
| O133 | 0.0818  | -0.00245 | 0.06464 |
| O134 | 0.1037  | 0.129    | 0.05811 |
| O135 | 0.30685 | 0.85978  | 0.12247 |

|      |         |         |          |
|------|---------|---------|----------|
| O136 | 0.31911 | 0.9834  | 0.05526  |
| O137 | 0.30849 | 0.11638 | 0.06178  |
| O138 | 0.51168 | 0.94512 | 0.29757  |
| O139 | 0.51974 | 0.12874 | 0.28307  |
| O140 | 0.64123 | 0.56706 | 0.26265  |
| O141 | 0.67661 | 0.56485 | 0.0708   |
| O142 | 0.79187 | 0.53605 | -0.02321 |
| O143 | 0.90323 | 0.5621  | 0.07978  |
| O144 | 0.88722 | 0.55407 | 0.27778  |
| O145 | 0.76565 | 0.54718 | 0.20893  |
| O146 | 0.64151 | 0.33403 | 0.25923  |
| O147 | 0.69014 | 0.33755 | 0.07826  |
| O148 | 0.80177 | 0.347   | 0.96577  |
| O149 | 0.90219 | 0.32364 | 0.09105  |
| O150 | 0.90358 | 0.33491 | 0.28803  |
| O151 | 0.76902 | 0.36585 | 0.23093  |
| O152 | 0.67265 | 0.45132 | 0.17844  |
| O153 | 0.91233 | 0.44439 | 0.16955  |
| O154 | 0.56745 | 0.62983 | 0.39516  |
| O155 | 0.5863  | 0.50049 | 0.41897  |
| O156 | 0.57562 | 0.36643 | 0.4267   |
| O157 | 0.79516 | 0.62682 | 0.36466  |
| O158 | 0.7908  | 0.49388 | 0.38434  |
| O159 | 0.80427 | 0.3646  | 0.43285  |
| O160 | 0.00546 | 0.53855 | 0.20174  |
| O161 | 0.01343 | 0.36072 | 0.18301  |
| O162 | 0.87284 | 0.42658 | 0.74146  |
| O163 | 0.79874 | 0.45421 | 0.57242  |
| O164 | 0.68997 | 0.42564 | 0.46196  |
| O165 | 0.58879 | 0.43526 | 0.59048  |
| O166 | 0.59635 | 0.42659 | 0.78734  |
| O167 | 0.72718 | 0.43614 | 0.74942  |
| O168 | 0.86284 | 0.67642 | 0.72978  |
| O169 | 0.80881 | 0.63579 | 0.56029  |
| O170 | 0.68774 | 0.64047 | 0.47946  |
| O171 | 0.57825 | 0.65616 | 0.58844  |
| O172 | 0.60647 | 0.66578 | 0.78181  |
| O173 | 0.73075 | 0.66275 | 0.71272  |
| O174 | 0.81096 | 0.55466 | 0.72202  |
| O175 | 0.58843 | 0.54621 | 0.69993  |
| O176 | 0.92579 | 0.36668 | 0.90483  |
| O177 | 0.90939 | 0.49901 | 0.90666  |
| O178 | 0.88067 | 0.62865 | 0.91475  |
| O179 | 0.68027 | 0.35215 | 0.88501  |

|      |         |         |         |
|------|---------|---------|---------|
| O180 | 0.67653 | 0.48532 | 0.91712 |
| O181 | 0.70388 | 0.6181  | 0.89632 |
| O182 | 0.4839  | 0.46415 | 0.70445 |
| O183 | 0.48597 | 0.63169 | 0.72481 |
| O184 | 0.64163 | 0.92383 | 0.29005 |
| O185 | 0.70136 | 0.92447 | 0.11423 |
| O186 | 0.80245 | 0.94176 | 0.98379 |
| O187 | 0.9007  | 0.92467 | 0.11543 |
| O188 | 0.89776 | 0.94576 | 0.31191 |
| O189 | 0.76977 | 0.95819 | 0.27334 |
| O190 | 0.64726 | 0.16373 | 0.26544 |
| O191 | 0.69934 | 0.143   | 0.0893  |
| O192 | 0.81113 | 0.13685 | 0.98538 |
| O193 | 0.91642 | 0.16721 | 0.09784 |
| O194 | 0.89976 | 0.15419 | 0.29376 |
| O195 | 0.77402 | 0.12224 | 0.25235 |
| O196 | 0.67452 | 0.03976 | 0.20777 |
| O197 | 0.92097 | 0.04636 | 0.18222 |
| O198 | 0.56953 | 0.87375 | 0.43868 |
| O199 | 0.58968 | 0.00476 | 0.43123 |
| O200 | 0.59726 | 0.13689 | 0.44572 |
| O201 | 0.81173 | 0.86424 | 0.40127 |
| O202 | 0.81683 | 0.99299 | 0.45199 |
| O203 | 0.81818 | 0.12764 | 0.44204 |
| O204 | 0.01204 | 0.95126 | 0.2186  |
| O205 | 0.01896 | 0.13414 | 0.21367 |
| O206 | 0.8603  | 0.04948 | 0.78814 |
| O207 | 0.80303 | 0.06744 | 0.61375 |
| O208 | 0.7049  | 0.06133 | 0.47707 |
| O209 | 0.60554 | 0.06394 | 0.60907 |
| O210 | 0.60459 | 0.04445 | 0.8065  |
| O211 | 0.73123 | 0.02315 | 0.76709 |
| O212 | 0.85751 | 0.83034 | 0.7706  |
| O213 | 0.80619 | 0.82622 | 0.59192 |
| O214 | 0.69432 | 0.84765 | 0.49131 |
| O215 | 0.59352 | 0.81885 | 0.61593 |
| O216 | 0.60506 | 0.84251 | 0.80924 |
| O217 | 0.72891 | 0.85643 | 0.74829 |
| O218 | 0.81992 | 0.94343 | 0.68278 |
| O219 | 0.58185 | 0.94332 | 0.68048 |
| O220 | 0.93371 | 0.12022 | 0.91404 |
| O221 | 0.92212 | 0.98907 | 0.94232 |
| O222 | 0.90527 | 0.8573  | 0.94958 |
| O223 | 0.69479 | 0.12097 | 0.89282 |

|      |         |         |         |
|------|---------|---------|---------|
| O224 | 0.68351 | 0.99439 | 0.94843 |
| O225 | 0.70048 | 0.86159 | 0.94434 |
| O226 | 0.49207 | 0.0411  | 0.70953 |
| O227 | 0.48643 | 0.8554  | 0.72291 |
| O228 | 0.35714 | 0.43457 | 0.71878 |
| O229 | 0.31699 | 0.42409 | 0.90613 |
| O230 | 0.20485 | 0.45091 | 0.00564 |
| O231 | 0.09942 | 0.42151 | 0.89153 |
| O232 | 0.11157 | 0.44956 | 0.69442 |
| O233 | 0.23144 | 0.45626 | 0.76443 |
| O234 | 0.35575 | 0.65441 | 0.71604 |
| O235 | 0.30033 | 0.66953 | 0.89132 |
| O236 | 0.1928  | 0.64267 | 0.00292 |
| O237 | 0.08238 | 0.66648 | 0.90028 |
| O238 | 0.1018  | 0.64966 | 0.7049  |
| O239 | 0.22824 | 0.6236  | 0.74143 |
| O240 | 0.32188 | 0.5456  | 0.821   |
| O241 | 0.07718 | 0.54436 | 0.82473 |
| O242 | 0.43212 | 0.37011 | 0.58554 |
| O243 | 0.40235 | 0.49607 | 0.55488 |
| O244 | 0.42322 | 0.62863 | 0.55028 |
| O245 | 0.20252 | 0.36751 | 0.62034 |
| O246 | 0.21075 | 0.49645 | 0.57668 |
| O247 | 0.18645 | 0.62829 | 0.55428 |
| O248 | 0.99416 | 0.44297 | 0.77599 |
| O249 | 0.98161 | 0.63079 | 0.78242 |
| O250 | 0.13472 | 0.54389 | 0.22678 |
| O251 | 0.1994  | 0.55059 | 0.39675 |
| O252 | 0.30434 | 0.57884 | 0.50989 |
| O253 | 0.40602 | 0.56398 | 0.38477 |
| O254 | 0.39694 | 0.5605  | 0.1901  |
| O255 | 0.26654 | 0.55399 | 0.22907 |
| O256 | 0.13048 | 0.33317 | 0.25615 |
| O257 | 0.19288 | 0.34502 | 0.42594 |
| O258 | 0.31179 | 0.3486  | 0.51024 |
| O259 | 0.41662 | 0.33259 | 0.39351 |
| O260 | 0.3872  | 0.33684 | 0.19841 |
| O261 | 0.26311 | 0.32111 | 0.26234 |
| O262 | 0.20836 | 0.44008 | 0.28492 |
| O263 | 0.41855 | 0.44785 | 0.29459 |
| O264 | 0.07562 | 0.61861 | 0.08682 |
| O265 | 0.08353 | 0.48686 | 0.06198 |
| O266 | 0.11805 | 0.35726 | 0.06073 |
| O267 | 0.31391 | 0.61757 | 0.07013 |

|      |          |         |         |
|------|----------|---------|---------|
| O268 | 0.32144  | 0.48314 | 0.08199 |
| O269 | 0.28682  | 0.35482 | 0.07028 |
| O270 | 0.51282  | 0.54202 | 0.26865 |
| O271 | 0.51041  | 0.35299 | 0.25669 |
| O272 | 0.44041  | 0.74372 | 0.63925 |
| O273 | 0.19476  | 0.74096 | 0.65491 |
| O274 | 0.27474  | 0.74354 | 0.04968 |
| O275 | 0.11095  | 0.74355 | 0.05455 |
| O276 | 0.0704   | 0.2452  | 0.13436 |
| O277 | 0.31387  | 0.23466 | 0.13551 |
| O278 | 0.22899  | 0.24755 | 0.55478 |
| O279 | 0.39676  | 0.24733 | 0.54362 |
| O280 | 0.56175  | 0.2468  | 0.35069 |
| O281 | 0.80157  | 0.23983 | 0.3391  |
| O282 | 0.72625  | 0.23884 | 0.95773 |
| O283 | 0.8866   | 0.24264 | 0.93959 |
| O284 | 0.93582  | 0.74317 | 0.86284 |
| O285 | 0.69622  | 0.74746 | 0.85657 |
| O286 | 0.77258  | 0.7423  | 0.44826 |
| O287 | 0.60977  | 0.74773 | 0.45221 |
| O288 | 0.96474  | 0.27465 | 0.44365 |
| O289 | 0.94537  | 0.22031 | 0.60779 |
| O290 | 0.88152  | 0.33158 | 0.56582 |
| O291 | -0.00273 | 0.33592 | 0.61285 |
| GA29 | 0.93558  | 0.41478 | 0.62383 |
| H293 | 0.94687  | 0.30341 | 0.38715 |
| H294 | 0.83537  | 0.3466  | 0.49148 |
| H295 | 0.92303  | 0.18524 | 0.56878 |
| H296 | 0.10166  | 0.55124 | 0.5389  |
| H297 | 0.05823  | 0.56539 | 0.42664 |
| H298 | -0.02396 | 0.59502 | 0.54234 |
| H299 | 0.00749  | 0.54288 | 0.63575 |
| H300 | 0.89143  | 0.51561 | 0.53783 |
| H301 | 1.01765  | 0.41067 | 0.3334  |
| H302 | 0.11564  | 0.45489 | 0.41881 |
| H303 | 0.9048   | 0.44301 | 0.3921  |
| H304 | 0.07447  | 0.42771 | 0.52711 |
| AL30 | 0.81766  | 0.32258 | 0.31401 |
| AL30 | 0.79705  | 0.4704  | 0.69878 |
| P307 | 0.94791  | 0.29116 | 0.55508 |
| C308 | 0.94106  | 0.49329 | 0.52999 |
| C309 | 0.05956  | 0.53395 | 0.49416 |
| C310 | -0.00397 | 0.54425 | 0.55552 |
| C311 | 1.01028  | 0.43907 | 0.40187 |

|                                         |         |         |         |
|-----------------------------------------|---------|---------|---------|
| C312                                    | 0.94928 | 0.45692 | 0.43368 |
| C313                                    | 0.06929 | 0.46079 | 0.46123 |
| <b>C<sub>6</sub>H<sub>8</sub>+Ga(H)</b> |         |         |         |
| SI2                                     | 0.42584 | 0.05297 | 0.64273 |
| SI3                                     | 0.30507 | 0.02037 | 0.78246 |
| SI4                                     | 0.28247 | 0.04969 | 0.00795 |
| SI5                                     | 0.12282 | 0.05752 | 0.01005 |
| SI6                                     | 0.07097 | 0.02334 | 0.79747 |
| SI7                                     | 0.17874 | 0.04986 | 0.64621 |
| SI8                                     | 0.42197 | 0.82027 | 0.6709  |
| SI9                                     | 0.30519 | 0.86252 | 0.80773 |
| SI10                                    | 0.27029 | 0.82368 | 0.02906 |
| SI11                                    | 0.1156  | 0.82113 | 0.01776 |
| SI12                                    | 0.06604 | 0.8651  | 0.80289 |
| SI13                                    | 0.18211 | 0.82065 | 0.67354 |
| SI14                                    | 0.07749 | 0.93823 | 0.14947 |
| SI15                                    | 0.19955 | 0.96736 | 0.29324 |
| SI16                                    | 0.21884 | 0.92935 | 0.51294 |
| SI17                                    | 0.37825 | 0.92876 | 0.51459 |
| SI18                                    | 0.43262 | 0.96301 | 0.30559 |
| SI19                                    | 0.3237  | 0.93704 | 0.15479 |
| SI20                                    | 0.08427 | 0.16767 | 0.16216 |
| SI21                                    | 0.20202 | 0.1248  | 0.30523 |
| SI22                                    | 0.23446 | 0.16958 | 0.52218 |
| SI23                                    | 0.38934 | 0.17023 | 0.5086  |
| SI24                                    | 0.4396  | 0.12066 | 0.30041 |
| SI25                                    | 0.32432 | 0.15715 | 0.16464 |
| SI26                                    | 0.57737 | 0.55912 | 0.33716 |
| SI27                                    | 0.68612 | 0.53066 | 0.17857 |
| SI28                                    | 0.71235 | 0.55149 | 0.96313 |
| SI29                                    | 0.87025 | 0.55753 | 0.9676  |
| SI30                                    | 0.92774 | 0.5246  | 0.17872 |
| SI31                                    | 0.80764 | 0.55702 | 0.30603 |
| SI32                                    | 0.57515 | 0.3258  | 0.32327 |
| SI33                                    | 0.69434 | 0.37162 | 0.18527 |
| SI34                                    | 0.72453 | 0.31887 | 0.97251 |
| SI35                                    | 0.87816 | 0.31897 | 0.98179 |
| SI36                                    | 0.9338  | 0.36654 | 0.18736 |
| SI37                                    | 0.92406 | 0.43153 | 0.84095 |
| SI38                                    | 0.77264 | 0.44045 | 0.46589 |
| SI39                                    | 0.61299 | 0.43399 | 0.478   |
| SI40                                    | 0.56537 | 0.46822 | 0.69668 |
| SI41                                    | 0.67674 | 0.42527 | 0.82859 |

|      |         |         |         |
|------|---------|---------|---------|
| SI42 | 0.9156  | 0.66919 | 0.81934 |
| SI43 | 0.80394 | 0.62858 | 0.68113 |
| SI44 | 0.76491 | 0.66205 | 0.46357 |
| SI45 | 0.61009 | 0.66926 | 0.47825 |
| SI46 | 0.56472 | 0.62477 | 0.69654 |
| SI47 | 0.68446 | 0.67226 | 0.81134 |
| SI48 | 0.57878 | 0.9384  | 0.3645  |
| SI49 | 0.69673 | 0.96186 | 0.22184 |
| SI50 | 0.72235 | 0.93001 | 0.99834 |
| SI51 | 0.88201 | 0.92771 | 0.99802 |
| SI52 | 0.93304 | 0.96651 | 0.2076  |
| SI53 | 0.82329 | 0.94033 | 0.3603  |
| SI54 | 0.58135 | 0.16986 | 0.33723 |
| SI55 | 0.6992  | 0.11762 | 0.20567 |
| SI56 | 0.73272 | 0.15967 | 0.98367 |
| SI57 | 0.88657 | 0.16593 | 0.98672 |
| SI58 | 0.93917 | 0.12459 | 0.1981  |
| SI59 | 0.82254 | 0.16263 | 0.33246 |
| SI60 | 0.92607 | 0.04784 | 0.85898 |
| SI61 | 0.80374 | 0.02063 | 0.71421 |
| SI62 | 0.78514 | 0.06276 | 0.49634 |
| SI63 | 0.62465 | 0.06711 | 0.49192 |
| SI64 | 0.57108 | 0.02302 | 0.70099 |
| SI65 | 0.67905 | 0.04507 | 0.85477 |
| SI66 | 0.92168 | 0.82213 | 0.84207 |
| SI67 | 0.80262 | 0.86459 | 0.69888 |
| SI68 | 0.77073 | 0.82017 | 0.48329 |
| SI69 | 0.61667 | 0.82257 | 0.49959 |
| SI70 | 0.56661 | 0.86529 | 0.70752 |
| SI71 | 0.68275 | 0.82658 | 0.83848 |
| SI72 | 0.42105 | 0.44199 | 0.64248 |
| SI73 | 0.30634 | 0.46819 | 0.79872 |
| SI74 | 0.28503 | 0.42809 | 0.01446 |
| SI75 | 0.1295  | 0.4298  | 0.00805 |
| SI76 | 0.07471 | 0.46405 | 0.80054 |
| SI77 | 0.18717 | 0.44397 | 0.65697 |
| SI78 | 0.42549 | 0.66553 | 0.65757 |
| SI79 | 0.30185 | 0.6237  | 0.79235 |
| SI80 | 0.27042 | 0.66903 | 0.00364 |
| SI81 | 0.11597 | 0.6673  | 0.00858 |
| SI82 | 0.06201 | 0.6225  | 0.80006 |
| SI83 | 0.1784  | 0.66165 | 0.66287 |
| SI84 | 0.07578 | 0.54732 | 0.14175 |
| SI85 | 0.2032  | 0.52317 | 0.28015 |

|      |         |         |         |
|------|---------|---------|---------|
| SI86 | 0.22464 | 0.56306 | 0.50608 |
| SI87 | 0.3842  | 0.5651  | 0.50087 |
| SI88 | 0.43265 | 0.52671 | 0.28615 |
| SI89 | 0.32651 | 0.55311 | 0.13672 |
| SI90 | 0.08368 | 0.324   | 0.16003 |
| SI91 | 0.1992  | 0.36156 | 0.3079  |
| SI92 | 0.23472 | 0.32678 | 0.52726 |
| SI93 | 0.38995 | 0.32499 | 0.50896 |
| SI94 | 0.43373 | 0.36776 | 0.28856 |
| SI95 | 0.31495 | 0.31349 | 0.16698 |
| O96  | 0.36126 | 0.05798 | 0.71564 |
| O97  | 0.30232 | 0.05569 | 0.89127 |
| O98  | 0.20214 | 0.04295 | 0.02322 |
| O99  | 0.10292 | 0.06191 | 0.89312 |
| O100 | 0.10469 | 0.05185 | 0.69566 |
| O101 | 0.23209 | 0.02764 | 0.73136 |
| O102 | 0.36087 | 0.81768 | 0.75052 |
| O103 | 0.30713 | 0.84326 | 0.92512 |
| O104 | 0.19255 | 0.84768 | 0.02263 |
| O105 | 0.08838 | 0.82661 | 0.90422 |
| O106 | 0.10481 | 0.83191 | 0.70783 |
| O107 | 0.2311  | 0.84737 | 0.76246 |
| O108 | 0.32409 | 0.94125 | 0.79235 |
| O109 | 0.08638 | 0.94371 | 0.8105  |
| O110 | 0.43436 | 0.12282 | 0.5808  |
| O111 | 0.41837 | 0.99163 | 0.56321 |
| O112 | 0.39954 | 0.85974 | 0.5702  |
| O113 | 0.19537 | 0.12432 | 0.60394 |
| O114 | 0.17926 | 0.9944  | 0.55684 |
| O115 | 0.19659 | 0.8606  | 0.56972 |
| O116 | 0.9912  | 0.03648 | 0.78904 |
| O117 | 0.98585 | 0.8573  | 0.78794 |
| O118 | 0.14329 | 0.9367  | 0.2196  |
| O119 | 0.20025 | 0.9228  | 0.39518 |
| O120 | 0.29858 | 0.94146 | 0.52804 |
| O121 | 0.39758 | 0.9222  | 0.39723 |
| O122 | 0.39878 | 0.94051 | 0.20034 |
| O123 | 0.27232 | 0.96352 | 0.24024 |
| O124 | 0.14728 | 0.16307 | 0.23726 |
| O125 | 0.20009 | 0.16109 | 0.41328 |
| O126 | 0.31196 | 0.14511 | 0.51595 |
| O127 | 0.41462 | 0.16661 | 0.39361 |
| O128 | 0.4013  | 0.14468 | 0.19921 |
| O129 | 0.27572 | 0.13216 | 0.25521 |



|      |         |         |         |
|------|---------|---------|---------|
| O130 | 0.18313 | 0.04575 | 0.31767 |
| O131 | 0.42175 | 0.04288 | 0.32506 |
| O132 | 0.07027 | 0.8663  | 0.09261 |
| O133 | 0.08193 | 0.99744 | 0.06546 |
| O134 | 0.10243 | 0.1293  | 0.05869 |
| O135 | 0.3069  | 0.8602  | 0.1226  |
| O136 | 0.31846 | 0.98378 | 0.05538 |
| O137 | 0.30914 | 0.11684 | 0.06246 |
| O138 | 0.51167 | 0.94618 | 0.29784 |
| O139 | 0.51952 | 0.13003 | 0.284   |
| O140 | 0.63897 | 0.56738 | 0.2603  |
| O141 | 0.67276 | 0.5617  | 0.06837 |
| O142 | 0.79201 | 0.54101 | 0.98242 |
| O143 | 0.90824 | 0.56089 | 0.07412 |
| O144 | 0.88478 | 0.55692 | 0.26942 |
| O145 | 0.76307 | 0.54884 | 0.20602 |
| O146 | 0.64244 | 0.33191 | 0.25798 |
| O147 | 0.68673 | 0.33868 | 0.07499 |
| O148 | 0.80186 | 0.34609 | 0.97287 |
| O149 | 0.90352 | 0.32188 | 0.09641 |
| O150 | 0.90408 | 0.33609 | 0.29155 |
| O151 | 0.76934 | 0.3634  | 0.22579 |
| O152 | 0.67221 | 0.45042 | 0.18132 |
| O153 | 0.9127  | 0.44448 | 0.16988 |
| O154 | 0.56631 | 0.63035 | 0.39395 |
| O155 | 0.59017 | 0.50194 | 0.42125 |
| O156 | 0.58155 | 0.36749 | 0.42712 |
| O157 | 0.79396 | 0.62729 | 0.36314 |
| O158 | 0.78962 | 0.49431 | 0.37947 |
| O159 | 0.80328 | 0.36539 | 0.43015 |
| O160 | 0.00619 | 0.53867 | 0.20186 |
| O161 | 0.01465 | 0.36174 | 0.1882  |
| O162 | 0.87637 | 0.42057 | 0.74102 |
| O163 | 0.81069 | 0.45538 | 0.56797 |
| O164 | 0.69352 | 0.43001 | 0.47515 |
| O165 | 0.5868  | 0.43508 | 0.59127 |
| O166 | 0.60026 | 0.42747 | 0.78665 |
| O167 | 0.73107 | 0.43494 | 0.74223 |
| O168 | 0.86338 | 0.67609 | 0.72712 |
| O169 | 0.80717 | 0.63507 | 0.55929 |
| O170 | 0.68667 | 0.64131 | 0.47773 |
| O171 | 0.57742 | 0.65673 | 0.58694 |
| O172 | 0.60625 | 0.66661 | 0.77975 |
| O173 | 0.73122 | 0.6597  | 0.71363 |

|      |         |         |         |
|------|---------|---------|---------|
| O174 | 0.81388 | 0.55314 | 0.72076 |
| O175 | 0.58828 | 0.54676 | 0.69897 |
| O176 | 0.92528 | 0.36591 | 0.91164 |
| O177 | 0.90433 | 0.49786 | 0.90161 |
| O178 | 0.88175 | 0.6288  | 0.91193 |
| O179 | 0.68461 | 0.35158 | 0.88006 |
| O180 | 0.6829  | 0.48422 | 0.91273 |
| O181 | 0.70164 | 0.6186  | 0.89766 |
| O182 | 0.48488 | 0.46255 | 0.70995 |
| O183 | 0.48542 | 0.6315  | 0.72267 |
| O184 | 0.6415  | 0.92396 | 0.29046 |
| O185 | 0.70131 | 0.92436 | 0.11471 |
| O186 | 0.80243 | 0.94074 | 0.98408 |
| O187 | 0.90068 | 0.92413 | 0.1157  |
| O188 | 0.89771 | 0.94552 | 0.31228 |
| O189 | 0.76971 | 0.95826 | 0.27359 |
| O190 | 0.64703 | 0.16414 | 0.26696 |
| O191 | 0.69956 | 0.14348 | 0.09125 |
| O192 | 0.81079 | 0.13604 | 0.9867  |
| O193 | 0.91604 | 0.16631 | 0.09961 |
| O194 | 0.89975 | 0.15309 | 0.29511 |
| O195 | 0.77338 | 0.12199 | 0.25551 |
| O196 | 0.67436 | 0.03988 | 0.20848 |
| O197 | 0.92192 | 0.04564 | 0.18283 |
| O198 | 0.56923 | 0.87485 | 0.43948 |
| O199 | 0.59023 | 0.00562 | 0.43113 |
| O200 | 0.59686 | 0.13771 | 0.44699 |
| O201 | 0.81166 | 0.86467 | 0.40214 |
| O202 | 0.81671 | 0.9938  | 0.45167 |
| O203 | 0.81938 | 0.12863 | 0.44471 |
| O204 | 0.01221 | 0.95005 | 0.21903 |
| O205 | 0.01905 | 0.13448 | 0.21552 |
| O206 | 0.86025 | 0.04942 | 0.78897 |
| O207 | 0.80288 | 0.06752 | 0.61458 |
| O208 | 0.70512 | 0.06297 | 0.47714 |
| O209 | 0.60592 | 0.06405 | 0.60961 |
| O210 | 0.60457 | 0.04404 | 0.80697 |
| O211 | 0.73128 | 0.02311 | 0.76775 |
| O212 | 0.85743 | 0.8305  | 0.77068 |
| O213 | 0.80562 | 0.82622 | 0.5924  |
| O214 | 0.69405 | 0.84771 | 0.49102 |
| O215 | 0.59357 | 0.81882 | 0.61585 |
| O216 | 0.60512 | 0.84248 | 0.80927 |
| O217 | 0.72889 | 0.85746 | 0.74887 |

|      |         |         |         |
|------|---------|---------|---------|
| O218 | 0.82016 | 0.94362 | 0.6827  |
| O219 | 0.58205 | 0.94329 | 0.68026 |
| O220 | 0.93348 | 0.11975 | 0.91554 |
| O221 | 0.92198 | 0.98848 | 0.94258 |
| O222 | 0.90557 | 0.85667 | 0.94956 |
| O223 | 0.69437 | 0.12023 | 0.8947  |
| O224 | 0.68345 | 0.99339 | 0.94854 |
| O225 | 0.70028 | 0.86062 | 0.94505 |
| O226 | 0.49223 | 0.04102 | 0.70961 |
| O227 | 0.48656 | 0.85562 | 0.72292 |
| O228 | 0.35689 | 0.43813 | 0.716   |
| O229 | 0.31119 | 0.42304 | 0.89966 |
| O230 | 0.2072  | 0.45218 | 0.01824 |
| O231 | 0.10991 | 0.42295 | 0.89087 |
| O232 | 0.10943 | 0.44801 | 0.69333 |
| O233 | 0.23096 | 0.46321 | 0.7547  |
| O234 | 0.35561 | 0.65535 | 0.71618 |
| O235 | 0.29895 | 0.6717  | 0.89007 |
| O236 | 0.19349 | 0.64207 | 0.00467 |
| O237 | 0.08518 | 0.66649 | 0.89624 |
| O238 | 0.10217 | 0.64797 | 0.70092 |
| O239 | 0.22839 | 0.62341 | 0.74027 |
| O240 | 0.3219  | 0.54704 | 0.82342 |
| O241 | 0.07764 | 0.54386 | 0.82385 |
| O242 | 0.43236 | 0.36983 | 0.58819 |
| O243 | 0.40987 | 0.49672 | 0.55408 |
| O244 | 0.42082 | 0.63023 | 0.54841 |
| O245 | 0.20258 | 0.36812 | 0.61991 |
| O246 | 0.20095 | 0.49588 | 0.56575 |
| O247 | 0.18851 | 0.62957 | 0.55203 |
| O248 | 0.9979  | 0.43764 | 0.79038 |
| O249 | 0.98271 | 0.63101 | 0.7797  |
| O250 | 0.13601 | 0.54633 | 0.22251 |
| O251 | 0.20336 | 0.5572  | 0.38998 |
| O252 | 0.30442 | 0.57162 | 0.51727 |
| O253 | 0.40261 | 0.56384 | 0.38391 |
| O254 | 0.39869 | 0.56085 | 0.18908 |
| O255 | 0.26817 | 0.5495  | 0.22062 |
| O256 | 0.13228 | 0.3322  | 0.25612 |
| O257 | 0.19339 | 0.34458 | 0.42598 |
| O258 | 0.31211 | 0.34934 | 0.511   |
| O259 | 0.41782 | 0.33312 | 0.39597 |
| O260 | 0.39022 | 0.33328 | 0.20015 |
| O261 | 0.26525 | 0.32602 | 0.26162 |

|      |          |         |         |
|------|----------|---------|---------|
| O262 | 0.20507  | 0.4419  | 0.28919 |
| O263 | 0.41519  | 0.44713 | 0.29386 |
| O264 | 0.0743   | 0.61838 | 0.08234 |
| O265 | 0.08312  | 0.48664 | 0.0606  |
| O266 | 0.11753  | 0.35751 | 0.06131 |
| O267 | 0.31626  | 0.61835 | 0.06732 |
| O268 | 0.32882  | 0.48428 | 0.07198 |
| O269 | 0.29247  | 0.35568 | 0.06865 |
| O270 | 0.5119   | 0.53864 | 0.27363 |
| O271 | 0.51187  | 0.35592 | 0.2607  |
| O272 | 0.44049  | 0.74425 | 0.63877 |
| O273 | 0.19481  | 0.74109 | 0.65547 |
| O274 | 0.27484  | 0.7437  | 0.0508  |
| O275 | 0.11121  | 0.74312 | 0.05262 |
| O276 | 0.06983  | 0.24571 | 0.13566 |
| O277 | 0.31178  | 0.23513 | 0.13724 |
| O278 | 0.22961  | 0.24776 | 0.55542 |
| O279 | 0.39606  | 0.24752 | 0.54516 |
| O280 | 0.56163  | 0.24794 | 0.35254 |
| O281 | 0.80278  | 0.24    | 0.34029 |
| O282 | 0.72593  | 0.23835 | 0.95843 |
| O283 | 0.88605  | 0.24207 | 0.94306 |
| O284 | 0.93658  | 0.7431  | 0.86026 |
| O285 | 0.69682  | 0.7473  | 0.85413 |
| O286 | 0.77253  | 0.74249 | 0.44829 |
| O287 | 0.60873  | 0.74856 | 0.45088 |
| O288 | 0.96533  | 0.27057 | 0.43876 |
| O289 | 0.93076  | 0.20954 | 0.59356 |
| O290 | 0.88332  | 0.33009 | 0.55904 |
| O291 | 0.99564  | 0.31787 | 0.61731 |
| GA29 | 0.94046  | 0.40214 | 0.6256  |
| H293 | 0.94514  | 0.2992  | 0.3831  |
| H294 | 0.83509  | 0.34697 | 0.48675 |
| H295 | 0.90553  | 0.17939 | 0.54935 |
| H296 | 0.08838  | 0.57854 | 0.51848 |
| H297 | 0.06428  | 0.5844  | 0.39288 |
| H298 | 0.97495  | 0.62384 | 0.53343 |
| H299 | -0.03114 | 0.47245 | 0.6057  |
| H300 | 0.8817   | 0.54959 | 0.4945  |
| H301 | 0.01305  | 0.39876 | 0.37162 |
| H302 | 0.10834  | 0.47103 | 0.41004 |
| H303 | 0.9005   | 0.44535 | 0.38935 |
| H304 | 0.07236  | 0.45981 | 0.52763 |
| AL30 | 0.81745  | 0.32264 | 0.31217 |

|                                                    |         |         |         |
|----------------------------------------------------|---------|---------|---------|
| AL30                                               | 0.80325 | 0.46848 | 0.69568 |
| P307                                               | 0.94497 | 0.28154 | 0.5501  |
| C308                                               | 0.9321  | 0.53562 | 0.47241 |
| C309                                               | 0.05309 | 0.55826 | 0.46386 |
| C310                                               | 0.98361 | 0.57614 | 0.49511 |
| C311                                               | 0.0047  | 0.44657 | 0.40934 |
| C312                                               | 0.94292 | 0.4723  | 0.42005 |
| C313                                               | 0.06321 | 0.48213 | 0.4532  |
| <b>C<sub>6</sub>H<sub>7</sub>Ga+H<sub>2</sub>*</b> |         |         |         |
| SI2                                                | 0.4268  | 0.05242 | 0.64324 |
| SI3                                                | 0.30591 | 0.02034 | 0.7829  |
| SI4                                                | 0.28301 | 0.05118 | 0.00803 |
| SI5                                                | 0.12331 | 0.05914 | 0.01035 |
| SI6                                                | 0.07163 | 0.02249 | 0.79775 |
| SI7                                                | 0.17943 | 0.04921 | 0.64664 |
| SI8                                                | 0.42272 | 0.81969 | 0.67023 |
| SI9                                                | 0.30619 | 0.86258 | 0.80757 |
| SI10                                               | 0.27081 | 0.82463 | 0.02909 |
| SI11                                               | 0.11667 | 0.82277 | 0.01693 |
| SI12                                               | 0.06768 | 0.86405 | 0.8017  |
| SI13                                               | 0.1839  | 0.82061 | 0.67211 |
| SI14                                               | 0.07776 | 0.93926 | 0.14911 |
| SI15                                               | 0.1994  | 0.96729 | 0.29256 |
| SI16                                               | 0.21984 | 0.92964 | 0.51232 |
| SI17                                               | 0.37907 | 0.92855 | 0.51459 |
| SI18                                               | 0.43301 | 0.96389 | 0.30585 |
| SI19                                               | 0.32405 | 0.9382  | 0.15462 |
| SI20                                               | 0.0838  | 0.1679  | 0.16237 |
| SI21                                               | 0.20139 | 0.12434 | 0.30492 |
| SI22                                               | 0.23521 | 0.16825 | 0.52244 |
| SI23                                               | 0.38983 | 0.16981 | 0.51007 |
| SI24                                               | 0.43966 | 0.1216  | 0.30154 |
| SI25                                               | 0.32406 | 0.15763 | 0.16575 |
| SI26                                               | 0.57592 | 0.55793 | 0.33859 |
| SI27                                               | 0.68748 | 0.5266  | 0.18526 |
| SI28                                               | 0.71009 | 0.54911 | 0.96619 |
| SI29                                               | 0.86828 | 0.55577 | 0.96639 |
| SI30                                               | 0.92671 | 0.52284 | 0.17757 |
| SI31                                               | 0.81294 | 0.55259 | 0.31379 |
| SI32                                               | 0.57996 | 0.32486 | 0.32399 |
| SI33                                               | 0.69373 | 0.36904 | 0.18055 |
| SI34                                               | 0.72781 | 0.31902 | 0.96792 |
| SI35                                               | 0.88199 | 0.31853 | 0.98171 |

|      |         |         |         |
|------|---------|---------|---------|
| SI36 | 0.93354 | 0.36507 | 0.19168 |
| SI37 | 0.92597 | 0.43101 | 0.8411  |
| SI38 | 0.77661 | 0.43779 | 0.47163 |
| SI39 | 0.617   | 0.43595 | 0.48027 |
| SI40 | 0.56483 | 0.46686 | 0.6959  |
| SI41 | 0.67368 | 0.42602 | 0.83061 |
| SI42 | 0.91615 | 0.66743 | 0.82009 |
| SI43 | 0.80427 | 0.62873 | 0.68157 |
| SI44 | 0.76531 | 0.6613  | 0.46307 |
| SI45 | 0.61041 | 0.66881 | 0.47724 |
| SI46 | 0.56456 | 0.62296 | 0.69458 |
| SI47 | 0.68289 | 0.66985 | 0.81344 |
| SI48 | 0.57891 | 0.93831 | 0.3644  |
| SI49 | 0.69677 | 0.96132 | 0.2206  |
| SI50 | 0.7228  | 0.92826 | 0.99825 |
| SI51 | 0.88254 | 0.92622 | 0.99714 |
| SI52 | 0.93324 | 0.96568 | 0.20657 |
| SI53 | 0.82335 | 0.93948 | 0.35895 |
| SI54 | 0.5817  | 0.16978 | 0.33932 |
| SI55 | 0.69965 | 0.11695 | 0.20678 |
| SI56 | 0.73395 | 0.16001 | 0.98486 |
| SI57 | 0.88792 | 0.1653  | 0.98592 |
| SI58 | 0.93946 | 0.12335 | 0.19737 |
| SI59 | 0.82285 | 0.16103 | 0.33302 |
| SI60 | 0.92662 | 0.04649 | 0.85821 |
| SI61 | 0.80352 | 0.0191  | 0.71455 |
| SI62 | 0.78487 | 0.06115 | 0.49612 |
| SI63 | 0.62477 | 0.06655 | 0.4927  |
| SI64 | 0.57204 | 0.02242 | 0.70223 |
| SI65 | 0.67934 | 0.04442 | 0.85677 |
| SI66 | 0.9229  | 0.82049 | 0.84105 |
| SI67 | 0.80306 | 0.86226 | 0.69808 |
| SI68 | 0.77117 | 0.81905 | 0.48156 |
| SI69 | 0.61707 | 0.82215 | 0.4988  |
| SI70 | 0.5675  | 0.86452 | 0.70752 |
| SI71 | 0.68298 | 0.82406 | 0.83896 |
| SI72 | 0.41967 | 0.44208 | 0.64215 |
| SI73 | 0.30553 | 0.46793 | 0.79772 |
| SI74 | 0.28519 | 0.42719 | 0.01429 |
| SI75 | 0.12816 | 0.42931 | 0.0066  |
| SI76 | 0.0756  | 0.46474 | 0.79924 |
| SI77 | 0.18656 | 0.44225 | 0.65471 |
| SI78 | 0.42461 | 0.66493 | 0.65698 |
| SI79 | 0.30187 | 0.62362 | 0.79373 |

|      |         |         |         |
|------|---------|---------|---------|
| SI80 | 0.26934 | 0.66949 | 0.00587 |
| SI81 | 0.11494 | 0.66943 | 0.01127 |
| SI82 | 0.06258 | 0.62331 | 0.80258 |
| SI83 | 0.17806 | 0.6631  | 0.66463 |
| SI84 | 0.07585 | 0.54821 | 0.13768 |
| SI85 | 0.20035 | 0.52284 | 0.28204 |
| SI86 | 0.21921 | 0.56258 | 0.5059  |
| SI87 | 0.37938 | 0.56487 | 0.50094 |
| SI88 | 0.431   | 0.52604 | 0.28748 |
| SI89 | 0.32448 | 0.55247 | 0.13882 |
| SI90 | 0.08219 | 0.32375 | 0.1625  |
| SI91 | 0.20013 | 0.36129 | 0.30852 |
| SI92 | 0.23548 | 0.32504 | 0.52678 |
| SI93 | 0.3904  | 0.32408 | 0.51018 |
| SI94 | 0.43611 | 0.36727 | 0.29185 |
| SI95 | 0.31839 | 0.31466 | 0.16925 |
| O96  | 0.36219 | 0.05784 | 0.71601 |
| O97  | 0.30269 | 0.05641 | 0.89118 |
| O98  | 0.20268 | 0.04487 | 0.02364 |
| O99  | 0.10311 | 0.06143 | 0.89345 |
| O100 | 0.10546 | 0.05107 | 0.69613 |
| O101 | 0.23299 | 0.02682 | 0.7314  |
| O102 | 0.36188 | 0.81779 | 0.75028 |
| O103 | 0.30783 | 0.84299 | 0.92483 |
| O104 | 0.1934  | 0.84993 | 0.02299 |
| O105 | 0.09099 | 0.82544 | 0.90241 |
| O106 | 0.10647 | 0.83165 | 0.70612 |
| O107 | 0.23226 | 0.84778 | 0.76162 |
| O108 | 0.32536 | 0.94138 | 0.7934  |
| O109 | 0.08716 | 0.94287 | 0.81067 |
| O110 | 0.43543 | 0.1222  | 0.58114 |
| O111 | 0.41955 | 0.99089 | 0.56403 |
| O112 | 0.40013 | 0.85912 | 0.56945 |
| O113 | 0.19594 | 0.12369 | 0.60466 |
| O114 | 0.17995 | 0.99435 | 0.55653 |
| O115 | 0.19799 | 0.86079 | 0.56853 |
| O116 | 0.99188 | 0.03518 | 0.7887  |
| O117 | 0.98749 | 0.85529 | 0.78768 |
| O118 | 0.14346 | 0.93547 | 0.21935 |
| O119 | 0.20104 | 0.92313 | 0.39471 |
| O120 | 0.29952 | 0.94198 | 0.52782 |
| O121 | 0.39824 | 0.92252 | 0.39712 |
| O122 | 0.399   | 0.94223 | 0.20045 |
| O123 | 0.27222 | 0.9643  | 0.23967 |

|      |         |         |         |
|------|---------|---------|---------|
| O124 | 0.14689 | 0.16365 | 0.23765 |
| O125 | 0.20073 | 0.15982 | 0.41359 |
| O126 | 0.31276 | 0.1437  | 0.51668 |
| O127 | 0.41486 | 0.16748 | 0.39486 |
| O128 | 0.40104 | 0.14536 | 0.20057 |
| O129 | 0.27509 | 0.13071 | 0.25457 |
| O130 | 0.18153 | 0.04547 | 0.31619 |
| O131 | 0.4225  | 0.0437  | 0.32647 |
| O132 | 0.06994 | 0.86884 | 0.08848 |
| O133 | 0.08246 | 1.00017 | 0.06817 |
| O134 | 0.10287 | 0.13138 | 0.05761 |
| O135 | 0.30808 | 0.86125 | 0.12202 |
| O136 | 0.31876 | 0.98517 | 0.05549 |
| O137 | 0.30996 | 0.11855 | 0.062   |
| O138 | 0.51197 | 0.94668 | 0.29766 |
| O139 | 0.5195  | 0.13148 | 0.28483 |
| O140 | 0.63943 | 0.56429 | 0.26475 |
| O141 | 0.67763 | 0.5607  | 0.07621 |
| O142 | 0.79011 | 0.53732 | 0.97543 |
| O143 | 0.90187 | 0.55926 | 0.07582 |
| O144 | 0.88879 | 0.55605 | 0.27263 |
| O145 | 0.76458 | 0.53799 | 0.2191  |
| O146 | 0.64237 | 0.32464 | 0.24787 |
| O147 | 0.68775 | 0.34122 | 0.06725 |
| O148 | 0.80542 | 0.34547 | 0.9711  |
| O149 | 0.90714 | 0.32132 | 0.09657 |
| O150 | 0.90115 | 0.33453 | 0.2936  |
| O151 | 0.76875 | 0.36105 | 0.22099 |
| O152 | 0.66909 | 0.44719 | 0.18429 |
| O153 | 0.91156 | 0.44274 | 0.17266 |
| O154 | 0.56621 | 0.62989 | 0.39369 |
| O155 | 0.58551 | 0.50011 | 0.42303 |
| O156 | 0.59867 | 0.36619 | 0.42494 |
| O157 | 0.79529 | 0.62384 | 0.3655  |
| O158 | 0.8061  | 0.49097 | 0.39322 |
| O159 | 0.79317 | 0.36031 | 0.42909 |
| O160 | 0.00538 | 0.53653 | 0.19222 |
| O161 | 0.01459 | 0.3612  | 0.19932 |
| O162 | 0.87309 | 0.41821 | 0.74672 |
| O163 | 0.815   | 0.43967 | 0.57788 |
| O164 | 0.69743 | 0.44644 | 0.48427 |
| O165 | 0.58719 | 0.4319  | 0.59169 |
| O166 | 0.59725 | 0.42591 | 0.78831 |
| O167 | 0.72556 | 0.44307 | 0.74334 |



|      |         |         |         |
|------|---------|---------|---------|
| O168 | 0.86401 | 0.67536 | 0.72773 |
| O169 | 0.80689 | 0.63641 | 0.56032 |
| O170 | 0.68698 | 0.64091 | 0.47633 |
| O171 | 0.57808 | 0.65566 | 0.58583 |
| O172 | 0.6053  | 0.66509 | 0.77843 |
| O173 | 0.73144 | 0.65713 | 0.71766 |
| O174 | 0.81607 | 0.55236 | 0.7162  |
| O175 | 0.58911 | 0.54512 | 0.69712 |
| O176 | 0.92977 | 0.3652  | 0.91163 |
| O177 | 0.90381 | 0.49629 | 0.90257 |
| O178 | 0.88052 | 0.62739 | 0.91188 |
| O179 | 0.68915 | 0.35105 | 0.87335 |
| O180 | 0.67693 | 0.48178 | 0.92015 |
| O181 | 0.69679 | 0.61581 | 0.90072 |
| O182 | 0.48425 | 0.4637  | 0.70712 |
| O183 | 0.48504 | 0.62888 | 0.71868 |
| O184 | 0.64157 | 0.92429 | 0.2902  |
| O185 | 0.7016  | 0.92251 | 0.11456 |
| O186 | 0.80285 | 0.93916 | 0.98385 |
| O187 | 0.90138 | 0.92272 | 0.11483 |
| O188 | 0.89776 | 0.94491 | 0.31127 |
| O189 | 0.76964 | 0.95787 | 0.27275 |
| O190 | 0.64738 | 0.16249 | 0.26941 |
| O191 | 0.70213 | 0.14648 | 0.09429 |
| O192 | 0.81186 | 0.13604 | 0.9862  |
| O193 | 0.91711 | 0.16547 | 0.09895 |
| O194 | 0.89952 | 0.15173 | 0.29405 |
| O195 | 0.77317 | 0.11857 | 0.25931 |
| O196 | 0.67457 | 0.03923 | 0.20437 |
| O197 | 0.92149 | 0.04464 | 0.18128 |
| O198 | 0.56955 | 0.87444 | 0.43884 |
| O199 | 0.59029 | 0.00516 | 0.43193 |
| O200 | 0.59631 | 0.13719 | 0.44908 |
| O201 | 0.81207 | 0.86377 | 0.40068 |
| O202 | 0.81656 | 0.99268 | 0.45078 |
| O203 | 0.82069 | 0.12763 | 0.44681 |
| O204 | 0.01244 | 0.94987 | 0.21904 |
| O205 | 0.01937 | 0.1326  | 0.21521 |
| O206 | 0.86101 | 0.04749 | 0.78777 |
| O207 | 0.80206 | 0.06563 | 0.61442 |
| O208 | 0.70517 | 0.06295 | 0.47551 |
| O209 | 0.60747 | 0.063   | 0.61078 |
| O210 | 0.60506 | 0.04395 | 0.80832 |
| O211 | 0.73169 | 0.02323 | 0.76952 |

|      |         |         |         |
|------|---------|---------|---------|
| O212 | 0.85935 | 0.82906 | 0.76818 |
| O213 | 0.80592 | 0.82458 | 0.59089 |
| O214 | 0.69457 | 0.84684 | 0.48945 |
| O215 | 0.59462 | 0.81862 | 0.6153  |
| O216 | 0.60566 | 0.84086 | 0.80913 |
| O217 | 0.72982 | 0.85301 | 0.74887 |
| O218 | 0.8184  | 0.94185 | 0.68276 |
| O219 | 0.58342 | 0.9427  | 0.68209 |
| O220 | 0.93398 | 0.11841 | 0.91469 |
| O221 | 0.9223  | 0.98717 | 0.94189 |
| O222 | 0.90595 | 0.8553  | 0.94812 |
| O223 | 0.69416 | 0.11913 | 0.89888 |
| O224 | 0.68355 | 0.9916  | 0.94904 |
| O225 | 0.70096 | 0.85887 | 0.94477 |
| O226 | 0.49322 | 0.04048 | 0.71008 |
| O227 | 0.48741 | 0.85511 | 0.72191 |
| O228 | 0.35693 | 0.4362  | 0.71767 |
| O229 | 0.30901 | 0.42263 | 0.89854 |
| O230 | 0.20653 | 0.44714 | 0.02121 |
| O231 | 0.10983 | 0.42229 | 0.88919 |
| O232 | 0.10958 | 0.44346 | 0.6936  |
| O233 | 0.23102 | 0.46429 | 0.75057 |
| O234 | 0.35618 | 0.65639 | 0.71952 |
| O235 | 0.29947 | 0.66991 | 0.89328 |
| O236 | 0.19211 | 0.6435  | 0.0042  |
| O237 | 0.08076 | 0.66632 | 0.90188 |
| O238 | 0.10294 | 0.65704 | 0.70977 |
| O239 | 0.22886 | 0.62435 | 0.74053 |
| O240 | 0.32202 | 0.54653 | 0.82245 |
| O241 | 0.08315 | 0.54489 | 0.81974 |
| O242 | 0.43248 | 0.37003 | 0.58827 |
| O243 | 0.40528 | 0.49678 | 0.555   |
| O244 | 0.4161  | 0.63026 | 0.5479  |
| O245 | 0.2038  | 0.36646 | 0.61945 |
| O246 | 0.19704 | 0.4932  | 0.56129 |
| O247 | 0.18262 | 0.62747 | 0.55548 |
| O248 | 0.99756 | 0.44332 | 0.78875 |
| O249 | 0.98274 | 0.62777 | 0.78172 |
| O250 | 0.13536 | 0.54551 | 0.21902 |
| O251 | 0.19774 | 0.5598  | 0.38956 |
| O252 | 0.29945 | 0.57131 | 0.51636 |
| O253 | 0.39917 | 0.56277 | 0.38435 |
| O254 | 0.39725 | 0.55916 | 0.18959 |
| O255 | 0.26754 | 0.54547 | 0.22436 |

|      |         |         |         |
|------|---------|---------|---------|
| O256 | 0.13636 | 0.32904 | 0.25202 |
| O257 | 0.19365 | 0.34092 | 0.42537 |
| O258 | 0.31261 | 0.34823 | 0.5097  |
| O259 | 0.4197  | 0.33146 | 0.39804 |
| O260 | 0.39483 | 0.33109 | 0.20208 |
| O261 | 0.2696  | 0.33221 | 0.26316 |
| O262 | 0.19982 | 0.44208 | 0.29578 |
| O263 | 0.41527 | 0.44604 | 0.29578 |
| O264 | 0.0738  | 0.62208 | 0.08747 |
| O265 | 0.08451 | 0.49061 | 0.05252 |
| O266 | 0.11092 | 0.35882 | 0.06153 |
| O267 | 0.31302 | 0.61969 | 0.07418 |
| O268 | 0.32703 | 0.48605 | 0.06893 |
| O269 | 0.29793 | 0.35576 | 0.06902 |
| O270 | 0.5101  | 0.53958 | 0.27471 |
| O271 | 0.51548 | 0.35908 | 0.26956 |
| O272 | 0.4413  | 0.74349 | 0.63874 |
| O273 | 0.19823 | 0.74155 | 0.65223 |
| O274 | 0.27412 | 0.74469 | 0.05109 |
| O275 | 0.11207 | 0.74545 | 0.05457 |
| O276 | 0.06695 | 0.24573 | 0.1375  |
| O277 | 0.3108  | 0.23606 | 0.14245 |
| O278 | 0.23099 | 0.24626 | 0.55607 |
| O279 | 0.39621 | 0.24689 | 0.54804 |
| O280 | 0.56325 | 0.24814 | 0.35628 |
| O281 | 0.80127 | 0.23795 | 0.33949 |
| O282 | 0.72786 | 0.23831 | 0.95624 |
| O283 | 0.88861 | 0.24152 | 0.94271 |
| O284 | 0.93725 | 0.74144 | 0.86044 |
| O285 | 0.69561 | 0.74467 | 0.85681 |
| O286 | 0.77298 | 0.74154 | 0.44507 |
| O287 | 0.60884 | 0.74813 | 0.4502  |
| O288 | 0.95022 | 0.25227 | 0.45242 |
| O289 | 0.90623 | 0.1883  | 0.59774 |
| O290 | 0.85908 | 0.30828 | 0.56089 |
| O291 | 0.96774 | 0.29829 | 0.63519 |
| GA29 | 0.91212 | 0.38679 | 0.61778 |
| H293 | 0.93899 | 0.28564 | 0.39925 |
| H294 | 0.81716 | 0.33177 | 0.48648 |
| H295 | 0.87957 | 0.16194 | 0.54885 |
| H296 | 0.05249 | 0.56758 | 0.60114 |
| H297 | 0.01414 | 0.45258 | 0.60795 |
| H298 | 0.90689 | 0.53623 | 0.59932 |
| H299 | 0.08154 | 0.54397 | 0.60155 |

|                                     |          |         |         |
|-------------------------------------|----------|---------|---------|
| H300                                | 0.9451   | 0.61334 | 0.46958 |
| H301                                | 0.07714  | 0.46261 | 0.34777 |
| H302                                | 0.03452  | 0.38037 | 0.46971 |
| H303                                | 1.04486  | 0.58156 | 0.36485 |
| H304                                | 0.96131  | 0.40437 | 0.40501 |
| AL30                                | 0.81493  | 0.32086 | 0.31017 |
| AL30                                | 0.80147  | 0.46798 | 0.70133 |
| P307                                | 0.92265  | 0.2612  | 0.56197 |
| C308                                | 0.96532  | 0.56243 | 0.47386 |
| C309                                | -0.02666 | 0.45087 | 0.55276 |
| C310                                | 0.94307  | 0.51938 | 0.54401 |
| C311                                | 0.03815  | 0.47791 | 0.39969 |
| C312                                | 1.01965  | 0.54268 | 0.40802 |
| C313                                | 0.00136  | 0.42339 | 0.45453 |
| <b>C<sub>6</sub>H<sub>7</sub>Ga</b> |          |         |         |
| SI2                                 | 0.42598  | 0.05233 | 0.64336 |
| SI3                                 | 0.3044   | 0.02053 | 0.78237 |
| SI4                                 | 0.28247  | 0.05173 | 0.00818 |
| SI5                                 | 0.12256  | 0.05737 | 0.00964 |
| SI6                                 | 0.07098  | 0.02302 | 0.796   |
| SI7                                 | 0.17826  | 0.05052 | 0.64547 |
| SI8                                 | 0.42162  | 0.81943 | 0.6696  |
| SI9                                 | 0.30437  | 0.86197 | 0.80646 |
| SI10                                | 0.26992  | 0.82435 | 0.02823 |
| SI11                                | 0.11537  | 0.82171 | 0.01648 |
| SI12                                | 0.06591  | 0.86477 | 0.8006  |
| SI13                                | 0.18164  | 0.81931 | 0.67179 |
| SI14                                | 0.07737  | 0.93761 | 0.14937 |
| SI15                                | 0.19881  | 0.96679 | 0.29345 |
| SI16                                | 0.21875  | 0.92944 | 0.51327 |
| SI17                                | 0.37799  | 0.9286  | 0.51473 |
| SI18                                | 0.43221  | 0.96379 | 0.30567 |
| SI19                                | 0.32321  | 0.93815 | 0.15469 |
| SI20                                | 0.08217  | 0.16589 | 0.16201 |
| SI21                                | 0.20068  | 0.12367 | 0.3039  |
| SI22                                | 0.23408  | 0.16928 | 0.52034 |
| SI23                                | 0.38874  | 0.16976 | 0.50978 |
| SI24                                | 0.43899  | 0.12195 | 0.30094 |
| SI25                                | 0.32305  | 0.15806 | 0.16557 |
| SI26                                | 0.57743  | 0.55755 | 0.33677 |
| SI27                                | 0.68911  | 0.52675 | 0.18448 |
| SI28                                | 0.71135  | 0.5487  | 0.96458 |
| SI29                                | 0.86961  | 0.55579 | 0.96718 |

|      |         |         |         |
|------|---------|---------|---------|
| SI30 | 0.92883 | 0.52395 | 0.17915 |
| SI31 | 0.81406 | 0.55353 | 0.31306 |
| SI32 | 0.58143 | 0.32473 | 0.32449 |
| SI33 | 0.69439 | 0.36889 | 0.18017 |
| SI34 | 0.72831 | 0.31926 | 0.96794 |
| SI35 | 0.88249 | 0.31852 | 0.98328 |
| SI36 | 0.93541 | 0.3653  | 0.19307 |
| SI37 | 0.92659 | 0.43072 | 0.84189 |
| SI38 | 0.77836 | 0.43871 | 0.4717  |
| SI39 | 0.61911 | 0.43619 | 0.48012 |
| SI40 | 0.56521 | 0.46611 | 0.69537 |
| SI41 | 0.67559 | 0.42534 | 0.82774 |
| SI42 | 0.91663 | 0.66778 | 0.8207  |
| SI43 | 0.8046  | 0.62895 | 0.68175 |
| SI44 | 0.76559 | 0.66125 | 0.4632  |
| SI45 | 0.61063 | 0.66807 | 0.47666 |
| SI46 | 0.56413 | 0.62249 | 0.69392 |
| SI47 | 0.6828  | 0.66972 | 0.81292 |
| SI48 | 0.57832 | 0.93776 | 0.36413 |
| SI49 | 0.69644 | 0.96115 | 0.22056 |
| SI50 | 0.72225 | 0.92835 | 0.99795 |
| SI51 | 0.88194 | 0.92613 | 0.99714 |
| SI52 | 0.93249 | 0.96511 | 0.2066  |
| SI53 | 0.823   | 0.93935 | 0.35925 |
| SI54 | 0.58141 | 0.16977 | 0.33958 |
| SI55 | 0.6993  | 0.11686 | 0.20691 |
| SI56 | 0.73366 | 0.16004 | 0.98509 |
| SI57 | 0.8876  | 0.16503 | 0.98732 |
| SI58 | 0.93845 | 0.12246 | 0.19877 |
| SI59 | 0.82228 | 0.16113 | 0.33388 |
| SI60 | 0.92613 | 0.04656 | 0.8588  |
| SI61 | 0.80309 | 0.01902 | 0.71517 |
| SI62 | 0.78439 | 0.061   | 0.49656 |
| SI63 | 0.62426 | 0.06583 | 0.49264 |
| SI64 | 0.57135 | 0.0222  | 0.70229 |
| SI65 | 0.67876 | 0.04467 | 0.85689 |
| SI66 | 0.92203 | 0.82075 | 0.84094 |
| SI67 | 0.80217 | 0.86208 | 0.69853 |
| SI68 | 0.77067 | 0.81897 | 0.48211 |
| SI69 | 0.61658 | 0.82159 | 0.49875 |
| SI70 | 0.56643 | 0.86413 | 0.70733 |
| SI71 | 0.68198 | 0.82398 | 0.83867 |
| SI72 | 0.42114 | 0.44205 | 0.64071 |
| SI73 | 0.30464 | 0.46828 | 0.79379 |

|      |         |         |         |
|------|---------|---------|---------|
| SI74 | 0.28635 | 0.42606 | 0.01021 |
| SI75 | 0.12889 | 0.42635 | 0.00685 |
| SI76 | 0.07601 | 0.46452 | 0.80009 |
| SI77 | 0.18498 | 0.44356 | 0.65071 |
| SI78 | 0.42366 | 0.66462 | 0.65556 |
| SI79 | 0.30051 | 0.62349 | 0.79196 |
| SI80 | 0.26993 | 0.669   | 0.00531 |
| SI81 | 0.11608 | 0.66837 | 0.00312 |
| SI82 | 0.06356 | 0.6221  | 0.7971  |
| SI83 | 0.17738 | 0.66065 | 0.65858 |
| SI84 | 0.07641 | 0.54895 | 0.13288 |
| SI85 | 0.20002 | 0.52346 | 0.27501 |
| SI86 | 0.22069 | 0.56101 | 0.50021 |
| SI87 | 0.38138 | 0.56348 | 0.49822 |
| SI88 | 0.43249 | 0.52509 | 0.28517 |
| SI89 | 0.3263  | 0.55106 | 0.13445 |
| SI90 | 0.0825  | 0.32104 | 0.16115 |
| SI91 | 0.19947 | 0.36261 | 0.3037  |
| SI92 | 0.23473 | 0.32655 | 0.52409 |
| SI93 | 0.38984 | 0.32404 | 0.51043 |
| SI94 | 0.43672 | 0.36657 | 0.2923  |
| SI95 | 0.31975 | 0.31566 | 0.16781 |
| O96  | 0.36153 | 0.0574  | 0.71638 |
| O97  | 0.30212 | 0.05584 | 0.89124 |
| O98  | 0.20218 | 0.04526 | 0.02412 |
| O99  | 0.10325 | 0.06034 | 0.89247 |
| O100 | 0.10423 | 0.05288 | 0.69479 |
| O101 | 0.23171 | 0.02932 | 0.73104 |
| O102 | 0.36067 | 0.81779 | 0.74947 |
| O103 | 0.30675 | 0.84335 | 0.92406 |
| O104 | 0.19221 | 0.84856 | 0.02205 |
| O105 | 0.08817 | 0.828   | 0.90321 |
| O106 | 0.10434 | 0.83025 | 0.7064  |
| O107 | 0.2306  | 0.84502 | 0.76152 |
| O108 | 0.32188 | 0.94102 | 0.79101 |
| O109 | 0.0867  | 0.94329 | 0.80575 |
| O110 | 0.4341  | 0.12212 | 0.58114 |
| O111 | 0.41871 | 0.9908  | 0.56415 |
| O112 | 0.39933 | 0.85897 | 0.56878 |
| O113 | 0.19434 | 0.12476 | 0.6021  |
| O114 | 0.17906 | 0.99444 | 0.55698 |
| O115 | 0.1964  | 0.86065 | 0.56941 |
| O116 | 0.99117 | 0.03566 | 0.78873 |
| O117 | 0.98563 | 0.85667 | 0.78648 |

|      |         |         |         |
|------|---------|---------|---------|
| O118 | 0.14274 | 0.93528 | 0.2203  |
| O119 | 0.20045 | 0.92254 | 0.39552 |
| O120 | 0.29846 | 0.94171 | 0.52907 |
| O121 | 0.39678 | 0.92316 | 0.39709 |
| O122 | 0.39822 | 0.94144 | 0.20053 |
| O123 | 0.27152 | 0.96384 | 0.24021 |
| O124 | 0.14624 | 0.16192 | 0.23533 |
| O125 | 0.20003 | 0.16088 | 0.41124 |
| O126 | 0.31148 | 0.14417 | 0.51589 |
| O127 | 0.41405 | 0.16732 | 0.39475 |
| O128 | 0.40014 | 0.14599 | 0.20021 |
| O129 | 0.27441 | 0.12935 | 0.25352 |
| O130 | 0.18115 | 0.04493 | 0.31784 |
| O131 | 0.42222 | 0.04383 | 0.32501 |
| O132 | 0.06973 | 0.86581 | 0.09231 |
| O133 | 0.0829  | 0.99662 | 0.06536 |
| O134 | 0.09983 | 0.12872 | 0.05732 |
| O135 | 0.30676 | 0.86149 | 0.12105 |
| O136 | 0.31837 | 0.9861  | 0.05659 |
| O137 | 0.30927 | 0.11981 | 0.06085 |
| O138 | 0.5111  | 0.94611 | 0.29796 |
| O139 | 0.51877 | 0.1325  | 0.28457 |
| O140 | 0.64081 | 0.56525 | 0.26283 |
| O141 | 0.6784  | 0.55908 | 0.07447 |
| O142 | 0.79137 | 0.53759 | 0.97504 |
| O143 | 0.90273 | 0.55905 | 0.077   |
| O144 | 0.89062 | 0.55667 | 0.27446 |
| O145 | 0.76635 | 0.53924 | 0.21739 |
| O146 | 0.64259 | 0.32405 | 0.2461  |
| O147 | 0.6876  | 0.34275 | 0.06601 |
| O148 | 0.80594 | 0.34535 | 0.97319 |
| O149 | 0.90856 | 0.32228 | 0.09755 |
| O150 | 0.90205 | 0.3348  | 0.29433 |
| O151 | 0.76946 | 0.35991 | 0.21996 |
| O152 | 0.67094 | 0.44731 | 0.1866  |
| O153 | 0.91515 | 0.44354 | 0.17518 |
| O154 | 0.56675 | 0.62921 | 0.39251 |
| O155 | 0.58847 | 0.49979 | 0.42076 |
| O156 | 0.60256 | 0.36615 | 0.42427 |
| O157 | 0.79579 | 0.62443 | 0.36522 |
| O158 | 0.80634 | 0.49164 | 0.3918  |
| O159 | 0.79424 | 0.36116 | 0.42909 |
| O160 | 0.0074  | 0.5398  | 0.19307 |
| O161 | 0.01646 | 0.36013 | 0.20089 |

|      |         |         |         |
|------|---------|---------|---------|
| O162 | 0.87417 | 0.41867 | 0.74678 |
| O163 | 0.81922 | 0.44204 | 0.57603 |
| O164 | 0.69942 | 0.44705 | 0.4887  |
| O165 | 0.58647 | 0.43232 | 0.58981 |
| O166 | 0.599   | 0.42489 | 0.78629 |
| O167 | 0.72719 | 0.44157 | 0.73961 |
| O168 | 0.86439 | 0.67538 | 0.72842 |
| O169 | 0.80728 | 0.63651 | 0.56048 |
| O170 | 0.68731 | 0.64042 | 0.47617 |
| O171 | 0.57788 | 0.65471 | 0.58493 |
| O172 | 0.60521 | 0.66433 | 0.77778 |
| O173 | 0.73172 | 0.65769 | 0.71735 |
| O174 | 0.81627 | 0.55276 | 0.71723 |
| O175 | 0.58847 | 0.54462 | 0.69716 |
| O176 | 0.92978 | 0.36487 | 0.91214 |
| O177 | 0.90537 | 0.49636 | 0.90339 |
| O178 | 0.88182 | 0.62751 | 0.91286 |
| O179 | 0.69109 | 0.35071 | 0.8717  |
| O180 | 0.67923 | 0.48161 | 0.91644 |
| O181 | 0.69749 | 0.61578 | 0.90011 |
| O182 | 0.4848  | 0.46169 | 0.70901 |
| O183 | 0.4844  | 0.6287  | 0.71696 |
| O184 | 0.6409  | 0.92411 | 0.28959 |
| O185 | 0.70143 | 0.92244 | 0.11442 |
| O186 | 0.80231 | 0.93917 | 0.98328 |
| O187 | 0.90065 | 0.92223 | 0.11483 |
| O188 | 0.89741 | 0.944   | 0.31141 |
| O189 | 0.76918 | 0.95764 | 0.27312 |
| O190 | 0.64685 | 0.16224 | 0.26932 |
| O191 | 0.70177 | 0.14626 | 0.09439 |
| O192 | 0.8115  | 0.13584 | 0.98637 |
| O193 | 0.91622 | 0.165   | 0.10068 |
| O194 | 0.89902 | 0.15089 | 0.29579 |
| O195 | 0.77267 | 0.11888 | 0.25983 |
| O196 | 0.67439 | 0.0391  | 0.20448 |
| O197 | 0.91984 | 0.04399 | 0.18182 |
| O198 | 0.56917 | 0.87366 | 0.43818 |
| O199 | 0.5897  | 0.00447 | 0.43195 |
| O200 | 0.59583 | 0.13642 | 0.44884 |
| O201 | 0.81144 | 0.86385 | 0.40139 |
| O202 | 0.81669 | 0.99302 | 0.45055 |
| O203 | 0.81949 | 0.12803 | 0.44781 |
| O204 | 0.01184 | 0.9499  | 0.21821 |
| O205 | 0.01841 | 0.13076 | 0.21679 |



|      |         |         |         |
|------|---------|---------|---------|
| O206 | 0.86041 | 0.04758 | 0.78855 |
| O207 | 0.80172 | 0.06526 | 0.61481 |
| O208 | 0.70468 | 0.06199 | 0.47592 |
| O209 | 0.60684 | 0.0625  | 0.61069 |
| O210 | 0.60449 | 0.04389 | 0.80827 |
| O211 | 0.73111 | 0.02335 | 0.76972 |
| O212 | 0.85775 | 0.82825 | 0.7693  |
| O213 | 0.80558 | 0.8246  | 0.59129 |
| O214 | 0.69403 | 0.84659 | 0.49024 |
| O215 | 0.59351 | 0.81828 | 0.61501 |
| O216 | 0.60455 | 0.84047 | 0.80898 |
| O217 | 0.72862 | 0.85295 | 0.74833 |
| O218 | 0.81802 | 0.94164 | 0.68398 |
| O219 | 0.58234 | 0.94239 | 0.68232 |
| O220 | 0.93369 | 0.11823 | 0.91596 |
| O221 | 0.92203 | 0.98698 | 0.94212 |
| O222 | 0.90536 | 0.85521 | 0.94826 |
| O223 | 0.69367 | 0.11941 | 0.89892 |
| O224 | 0.68304 | 0.9919  | 0.94926 |
| O225 | 0.70008 | 0.85913 | 0.94423 |
| O226 | 0.49257 | 0.04062 | 0.70994 |
| O227 | 0.48631 | 0.85469 | 0.72158 |
| O228 | 0.3565  | 0.43855 | 0.71282 |
| O229 | 0.30712 | 0.42135 | 0.89309 |
| O230 | 0.20735 | 0.4436  | 0.02262 |
| O231 | 0.11164 | 0.42179 | 0.88857 |
| O232 | 0.10874 | 0.44663 | 0.6923  |
| O233 | 0.23062 | 0.46542 | 0.74523 |
| O234 | 0.35519 | 0.65601 | 0.71808 |
| O235 | 0.29815 | 0.66976 | 0.89158 |
| O236 | 0.1931  | 0.64186 | 0.00576 |
| O237 | 0.08901 | 0.66937 | 0.88872 |
| O238 | 0.10095 | 0.64697 | 0.69554 |
| O239 | 0.22767 | 0.6242  | 0.73791 |
| O240 | 0.32061 | 0.54653 | 0.82157 |
| O241 | 0.08194 | 0.54434 | 0.82348 |
| O242 | 0.43272 | 0.36931 | 0.58836 |
| O243 | 0.41128 | 0.49691 | 0.55212 |
| O244 | 0.4145  | 0.63049 | 0.54622 |
| O245 | 0.20107 | 0.36734 | 0.61594 |
| O246 | 0.19402 | 0.49361 | 0.55618 |
| O247 | 0.18714 | 0.62794 | 0.54832 |
| O248 | 0.99841 | 0.44181 | 0.78979 |
| O249 | 0.98338 | 0.6285  | 0.78245 |

|      |         |         |         |
|------|---------|---------|---------|
| O250 | 0.13787 | 0.55335 | 0.21137 |
| O251 | 0.20004 | 0.55891 | 0.38364 |
| O252 | 0.30116 | 0.56494 | 0.51304 |
| O253 | 0.40127 | 0.56309 | 0.38152 |
| O254 | 0.39897 | 0.55681 | 0.18599 |
| O255 | 0.26961 | 0.54092 | 0.2197  |
| O256 | 0.13856 | 0.32413 | 0.24845 |
| O257 | 0.1949  | 0.34399 | 0.42139 |
| O258 | 0.31234 | 0.3493  | 0.51079 |
| O259 | 0.41894 | 0.33113 | 0.3982  |
| O260 | 0.39643 | 0.32962 | 0.20206 |
| O261 | 0.27106 | 0.3385  | 0.25929 |
| O262 | 0.19171 | 0.44277 | 0.28601 |
| O263 | 0.41578 | 0.44536 | 0.29516 |
| O264 | 0.07082 | 0.61832 | 0.06994 |
| O265 | 0.08481 | 0.48593 | 0.05661 |
| O266 | 0.11059 | 0.35501 | 0.05877 |
| O267 | 0.31469 | 0.61993 | 0.07346 |
| O268 | 0.32841 | 0.48659 | 0.06052 |
| O269 | 0.30266 | 0.35525 | 0.06477 |
| O270 | 0.51177 | 0.53816 | 0.27295 |
| O271 | 0.51631 | 0.35898 | 0.27198 |
| O272 | 0.44011 | 0.74327 | 0.63786 |
| O273 | 0.19398 | 0.74014 | 0.65051 |
| O274 | 0.27428 | 0.74439 | 0.05005 |
| O275 | 0.11116 | 0.74342 | 0.04981 |
| O276 | 0.06463 | 0.24348 | 0.13679 |
| O277 | 0.3086  | 0.23677 | 0.14547 |
| O278 | 0.22969 | 0.2476  | 0.55238 |
| O279 | 0.39499 | 0.24677 | 0.54797 |
| O280 | 0.5642  | 0.24829 | 0.35773 |
| O281 | 0.80163 | 0.23829 | 0.34011 |
| O282 | 0.72784 | 0.23848 | 0.95733 |
| O283 | 0.88884 | 0.24141 | 0.94485 |
| O284 | 0.93777 | 0.74193 | 0.86041 |
| O285 | 0.69474 | 0.74462 | 0.85666 |
| O286 | 0.77269 | 0.74157 | 0.44543 |
| O287 | 0.60889 | 0.74749 | 0.45023 |
| O288 | 0.95076 | 0.25294 | 0.45232 |
| O289 | 0.90523 | 0.18912 | 0.59718 |
| O290 | 0.86042 | 0.30999 | 0.56069 |
| O291 | 0.96871 | 0.29782 | 0.63543 |
| GA29 | 0.91418 | 0.38786 | 0.61796 |
| H293 | 0.93929 | 0.28633 | 0.39919 |

|                                    |          |         |         |
|------------------------------------|----------|---------|---------|
| H294                               | 0.81881  | 0.33277 | 0.4867  |
| H295                               | 0.87835  | 0.16322 | 0.54802 |
| H296                               | 0.02224  | 0.44171 | 0.60706 |
| H297                               | 0.92652  | 0.53772 | 0.62527 |
| H298                               | 0.96646  | 0.61941 | 0.50313 |
| H299                               | 0.07129  | 0.46571 | 0.33812 |
| H300                               | 0.03075  | 0.38056 | 0.45718 |
| H301                               | 1.05247  | 0.58536 | 0.37565 |
| H302                               | 0.95671  | 0.41321 | 0.40495 |
| AL30                               | 0.8157   | 0.32106 | 0.31035 |
| AL30                               | 0.80313  | 0.46844 | 0.69994 |
| P305                               | 0.92322  | 0.26178 | 0.56188 |
| C306                               | 0.98081  | 0.56664 | 0.49692 |
| C307                               | -0.02038 | 0.44939 | 0.55659 |
| C308                               | 0.95767  | 0.52125 | 0.56305 |
| C309                               | 0.03839  | 0.48105 | 0.39871 |
| C310                               | 1.02751  | 0.54634 | 0.41908 |
| C311                               | 0.00035  | 0.42662 | 0.45169 |
| <b>C<sub>6</sub>H<sub>6</sub>*</b> |          |         |         |
| SI2                                | 0.42584  | 0.05278 | 0.64195 |
| SI3                                | 0.30374  | 0.02069 | 0.78001 |
| SI4                                | 0.28221  | 0.05124 | 0.00691 |
| SI5                                | 0.12198  | 0.05829 | 0.00816 |
| SI6                                | 0.07099  | 0.02349 | 0.79366 |
| SI7                                | 0.17752  | 0.05125 | 0.64269 |
| SI8                                | 0.42229  | 0.82    | 0.66866 |
| SI9                                | 0.30458  | 0.86153 | 0.80592 |
| SI10                               | 0.27133  | 0.82423 | 0.02751 |
| SI11                               | 0.11665  | 0.82303 | 0.01665 |
| SI12                               | 0.06679  | 0.86543 | 0.79989 |
| SI13                               | 0.18204  | 0.81721 | 0.6733  |
| SI14                               | 0.07765  | 0.93835 | 0.14933 |
| SI15                               | 0.19874  | 0.96548 | 0.29546 |
| SI16                               | 0.21844  | 0.92797 | 0.5143  |
| SI17                               | 0.37774  | 0.92887 | 0.51357 |
| SI18                               | 0.43157  | 0.96423 | 0.30462 |
| SI19                               | 0.32242  | 0.93722 | 0.15504 |
| SI20                               | 0.08206  | 0.16567 | 0.16072 |
| SI21                               | 0.20199  | 0.12188 | 0.30116 |
| SI22                               | 0.23305  | 0.17139 | 0.51697 |
| SI23                               | 0.38952  | 0.172   | 0.50975 |
| SI24                               | 0.43865  | 0.12199 | 0.3009  |
| SI25                               | 0.32394  | 0.15633 | 0.1631  |

|      |         |         |         |
|------|---------|---------|---------|
| SI26 | 0.57933 | 0.55534 | 0.33766 |
| SI27 | 0.69435 | 0.52485 | 0.18777 |
| SI28 | 0.71338 | 0.5522  | 0.96835 |
| SI29 | 0.86995 | 0.55857 | 0.96991 |
| SI30 | 0.9246  | 0.52681 | 0.17904 |
| SI31 | 0.81714 | 0.5481  | 0.32584 |
| SI32 | 0.5782  | 0.3257  | 0.32852 |
| SI33 | 0.69669 | 0.37009 | 0.18731 |
| SI34 | 0.72765 | 0.31897 | 0.9725  |
| SI35 | 0.88163 | 0.32093 | 0.98143 |
| SI36 | 0.9352  | 0.36772 | 0.18798 |
| SI37 | 0.92823 | 0.4371  | 0.85112 |
| SI38 | 0.78096 | 0.43331 | 0.47938 |
| SI39 | 0.62116 | 0.43402 | 0.47923 |
| SI40 | 0.57219 | 0.47097 | 0.69378 |
| SI41 | 0.66972 | 0.43136 | 0.84426 |
| SI42 | 0.91667 | 0.66988 | 0.82217 |
| SI43 | 0.80447 | 0.63247 | 0.68238 |
| SI44 | 0.76529 | 0.66226 | 0.46315 |
| SI45 | 0.61022 | 0.66859 | 0.47543 |
| SI46 | 0.56584 | 0.62608 | 0.69416 |
| SI47 | 0.6832  | 0.67232 | 0.81507 |
| SI48 | 0.57723 | 0.93847 | 0.36222 |
| SI49 | 0.69547 | 0.9631  | 0.21826 |
| SI50 | 0.722   | 0.93109 | 0.99657 |
| SI51 | 0.88147 | 0.92855 | 0.99462 |
| SI52 | 0.9325  | 0.9658  | 0.2038  |
| SI53 | 0.82234 | 0.93999 | 0.3559  |
| SI54 | 0.58155 | 0.16993 | 0.33673 |
| SI55 | 0.69665 | 0.11849 | 0.19824 |
| SI56 | 0.73332 | 0.16151 | 0.97836 |
| SI57 | 0.88777 | 0.16725 | 0.98317 |
| SI58 | 0.93863 | 0.12308 | 0.19462 |
| SI59 | 0.81963 | 0.16158 | 0.3247  |
| SI60 | 0.92534 | 0.04774 | 0.85467 |
| SI61 | 0.80272 | 0.01835 | 0.70954 |
| SI62 | 0.78342 | 0.06029 | 0.49215 |
| SI63 | 0.62383 | 0.06551 | 0.49017 |
| SI64 | 0.57155 | 0.02274 | 0.69955 |
| SI65 | 0.67961 | 0.04493 | 0.85239 |
| SI66 | 0.92207 | 0.82246 | 0.83785 |
| SI67 | 0.80261 | 0.8618  | 0.69306 |
| SI68 | 0.76971 | 0.81884 | 0.47667 |
| SI69 | 0.61584 | 0.82162 | 0.49493 |

|      |         |         |         |
|------|---------|---------|---------|
| SI70 | 0.56714 | 0.86479 | 0.70426 |
| SI71 | 0.683   | 0.82565 | 0.83685 |
| SI72 | 0.42194 | 0.44293 | 0.64294 |
| SI73 | 0.31573 | 0.46496 | 0.80463 |
| SI74 | 0.28744 | 0.42908 | 0.0227  |
| SI75 | 0.13126 | 0.42738 | 0.01178 |
| SI76 | 0.07669 | 0.46691 | 0.80872 |
| SI77 | 0.19293 | 0.44367 | 0.66335 |
| SI78 | 0.42509 | 0.66532 | 0.65606 |
| SI79 | 0.3032  | 0.62216 | 0.79094 |
| SI80 | 0.27103 | 0.66821 | 0.00448 |
| SI81 | 0.11713 | 0.67065 | 0.00121 |
| SI82 | 0.06289 | 0.6232  | 0.80121 |
| SI83 | 0.1777  | 0.65828 | 0.66112 |
| SI84 | 0.07544 | 0.55108 | 0.13169 |
| SI85 | 0.19566 | 0.52387 | 0.27888 |
| SI86 | 0.22104 | 0.56083 | 0.50213 |
| SI87 | 0.37921 | 0.56443 | 0.50058 |
| SI88 | 0.43587 | 0.52431 | 0.28686 |
| SI89 | 0.32353 | 0.55521 | 0.14979 |
| SI90 | 0.08423 | 0.32142 | 0.16323 |
| SI91 | 0.19889 | 0.3636  | 0.30452 |
| SI92 | 0.23308 | 0.32906 | 0.52656 |
| SI93 | 0.38997 | 0.32595 | 0.50925 |
| SI94 | 0.43463 | 0.36598 | 0.28748 |
| SI95 | 0.31652 | 0.31292 | 0.16967 |
| O96  | 0.36179 | 0.05742 | 0.71574 |
| O97  | 0.30182 | 0.05393 | 0.89007 |
| O98  | 0.2018  | 0.04888 | 0.0234  |
| O99  | 0.10298 | 0.06009 | 0.89089 |
| O100 | 0.10385 | 0.05493 | 0.69308 |
| O101 | 0.23166 | 0.0329  | 0.72848 |
| O102 | 0.36161 | 0.81831 | 0.74907 |
| O103 | 0.30852 | 0.84461 | 0.92407 |
| O104 | 0.19376 | 0.84923 | 0.02181 |
| O105 | 0.08911 | 0.83042 | 0.90378 |
| O106 | 0.10468 | 0.82883 | 0.70694 |
| O107 | 0.23068 | 0.84197 | 0.76394 |
| O108 | 0.3192  | 0.94074 | 0.78641 |
| O109 | 0.08821 | 0.94396 | 0.80119 |
| O110 | 0.43368 | 0.12293 | 0.58047 |
| O111 | 0.41799 | 0.99168 | 0.56221 |
| O112 | 0.39945 | 0.85963 | 0.56818 |
| O113 | 0.19214 | 0.12473 | 0.59488 |

|      |         |         |         |
|------|---------|---------|---------|
| O114 | 0.17815 | 0.99268 | 0.55797 |
| O115 | 0.19784 | 0.85902 | 0.57155 |
| O116 | 0.99115 | 0.03581 | 0.78648 |
| O117 | 0.98655 | 0.85835 | 0.78595 |
| O118 | 0.14241 | 0.93594 | 0.22125 |
| O119 | 0.19915 | 0.9205  | 0.3969  |
| O120 | 0.2981  | 0.94169 | 0.52788 |
| O121 | 0.39659 | 0.92303 | 0.39593 |
| O122 | 0.39769 | 0.94269 | 0.1991  |
| O123 | 0.27133 | 0.96122 | 0.24232 |
| O124 | 0.14709 | 0.15841 | 0.23148 |
| O125 | 0.20272 | 0.16265 | 0.40563 |
| O126 | 0.3113  | 0.14979 | 0.51882 |
| O127 | 0.41298 | 0.16768 | 0.39398 |
| O128 | 0.40086 | 0.14642 | 0.19954 |
| O129 | 0.27524 | 0.12518 | 0.24915 |
| O130 | 0.18257 | 0.04377 | 0.32165 |
| O131 | 0.42121 | 0.04408 | 0.32531 |
| O132 | 0.07068 | 0.86643 | 0.09277 |
| O133 | 0.08397 | 0.99693 | 0.0648  |
| O134 | 0.09687 | 0.12933 | 0.05435 |
| O135 | 0.30794 | 0.86012 | 0.12164 |
| O136 | 0.31491 | 0.98455 | 0.05676 |
| O137 | 0.31274 | 0.11831 | 0.05763 |
| O138 | 0.51036 | 0.9467  | 0.29533 |
| O139 | 0.51848 | 0.1316  | 0.28482 |
| O140 | 0.64413 | 0.56069 | 0.26626 |
| O141 | 0.69405 | 0.56754 | 0.08428 |
| O142 | 0.79289 | 0.53469 | 0.95727 |
| O143 | 0.88838 | 0.56567 | 0.08726 |
| O144 | 0.89266 | 0.55382 | 0.283   |
| O145 | 0.76918 | 0.52654 | 0.23397 |
| O146 | 0.64353 | 0.33165 | 0.25919 |
| O147 | 0.696   | 0.32958 | 0.08233 |
| O148 | 0.80483 | 0.34674 | 0.96823 |
| O149 | 0.9035  | 0.32275 | 0.0982  |
| O150 | 0.90507 | 0.33756 | 0.29211 |
| O151 | 0.76984 | 0.36888 | 0.23651 |
| O152 | 0.67178 | 0.44736 | 0.16936 |
| O153 | 0.91531 | 0.44583 | 0.16891 |
| O154 | 0.56806 | 0.62778 | 0.39121 |
| O155 | 0.58851 | 0.49925 | 0.42532 |
| O156 | 0.58927 | 0.36581 | 0.43326 |
| O157 | 0.79532 | 0.62057 | 0.36958 |

|      |         |         |         |
|------|---------|---------|---------|
| O158 | 0.81662 | 0.49003 | 0.41166 |
| O159 | 0.80755 | 0.35708 | 0.44012 |
| O160 | 0.00286 | 0.54612 | 0.18258 |
| O161 | 0.01624 | 0.36156 | 0.19122 |
| O162 | 0.86958 | 0.43104 | 0.76856 |
| O163 | 0.80645 | 0.43684 | 0.59246 |
| O164 | 0.70145 | 0.43556 | 0.46078 |
| O165 | 0.60576 | 0.43488 | 0.59728 |
| O166 | 0.59499 | 0.43188 | 0.79435 |
| O167 | 0.72401 | 0.44917 | 0.76139 |
| O168 | 0.86411 | 0.67824 | 0.73098 |
| O169 | 0.80783 | 0.64316 | 0.56184 |
| O170 | 0.68711 | 0.64165 | 0.47839 |
| O171 | 0.57675 | 0.65788 | 0.58397 |
| O172 | 0.60574 | 0.66903 | 0.7781  |
| O173 | 0.73167 | 0.66081 | 0.71916 |
| O174 | 0.8155  | 0.55615 | 0.71386 |
| O175 | 0.59435 | 0.54969 | 0.69716 |
| O176 | 0.93176 | 0.36871 | 0.91763 |
| O177 | 0.91959 | 0.50209 | 0.92275 |
| O178 | 0.88279 | 0.63035 | 0.91576 |
| O179 | 0.68195 | 0.35675 | 0.89068 |
| O180 | 0.67041 | 0.48719 | 0.93418 |
| O181 | 0.69683 | 0.61844 | 0.90298 |
| O182 | 0.49173 | 0.46969 | 0.68639 |
| O183 | 0.48597 | 0.63038 | 0.71843 |
| O184 | 0.64048 | 0.92629 | 0.28844 |
| O185 | 0.70082 | 0.92357 | 0.11277 |
| O186 | 0.80198 | 0.94278 | 0.98335 |
| O187 | 0.90166 | 0.92269 | 0.11159 |
| O188 | 0.89666 | 0.94454 | 0.3078  |
| O189 | 0.76824 | 0.9609  | 0.27124 |
| O190 | 0.64544 | 0.16408 | 0.26281 |
| O191 | 0.69748 | 0.14694 | 0.08502 |
| O192 | 0.81145 | 0.13875 | 0.98684 |
| O193 | 0.91935 | 0.16519 | 0.09481 |
| O194 | 0.89713 | 0.15162 | 0.2897  |
| O195 | 0.77096 | 0.12123 | 0.24801 |
| O196 | 0.67238 | 0.04051 | 0.19949 |
| O197 | 0.91999 | 0.04459 | 0.17825 |
| O198 | 0.56817 | 0.87369 | 0.4348  |
| O199 | 0.58674 | 0.0048  | 0.43155 |
| O200 | 0.59813 | 0.13673 | 0.44529 |
| O201 | 0.81018 | 0.86416 | 0.39608 |

|      |         |         |         |
|------|---------|---------|---------|
| O202 | 0.81756 | 0.99235 | 0.44904 |
| O203 | 0.81656 | 0.12641 | 0.43746 |
| O204 | 0.01178 | 0.95095 | 0.21715 |
| O205 | 0.01815 | 0.13169 | 0.21674 |
| O206 | 0.86016 | 0.0464  | 0.78334 |
| O207 | 0.80058 | 0.06612 | 0.61043 |
| O208 | 0.70382 | 0.0585  | 0.4716  |
| O209 | 0.60691 | 0.06383 | 0.60846 |
| O210 | 0.60486 | 0.04426 | 0.80545 |
| O211 | 0.731   | 0.02045 | 0.76558 |
| O212 | 0.85971 | 0.829   | 0.76231 |
| O213 | 0.8045  | 0.82357 | 0.58615 |
| O214 | 0.69319 | 0.84667 | 0.48551 |
| O215 | 0.59351 | 0.81885 | 0.6116  |
| O216 | 0.60573 | 0.84159 | 0.80562 |
| O217 | 0.72997 | 0.85286 | 0.74571 |
| O218 | 0.81792 | 0.94138 | 0.6764  |
| O219 | 0.58266 | 0.94309 | 0.67859 |
| O220 | 0.93156 | 0.12084 | 0.90793 |
| O221 | 0.92157 | 0.98995 | 0.94082 |
| O222 | 0.90302 | 0.85799 | 0.94333 |
| O223 | 0.69705 | 0.12027 | 0.88926 |
| O224 | 0.68304 | 0.99497 | 0.94832 |
| O225 | 0.70048 | 0.86255 | 0.9411  |
| O226 | 0.49273 | 0.04089 | 0.70767 |
| O227 | 0.48708 | 0.85547 | 0.71997 |
| O228 | 0.37177 | 0.42933 | 0.73566 |
| O229 | 0.31995 | 0.42822 | 0.91219 |
| O230 | 0.20892 | 0.4499  | 0.01796 |
| O231 | 0.10881 | 0.42072 | 0.89606 |
| O232 | 0.11815 | 0.4541  | 0.70679 |
| O233 | 0.24228 | 0.45292 | 0.75773 |
| O234 | 0.35576 | 0.65784 | 0.71693 |
| O235 | 0.30161 | 0.66676 | 0.89227 |
| O236 | 0.19367 | 0.64328 | 0.00042 |
| O237 | 0.08799 | 0.67433 | 0.88816 |
| O238 | 0.1017  | 0.64358 | 0.6988  |
| O239 | 0.22947 | 0.62169 | 0.73871 |
| O240 | 0.32711 | 0.54578 | 0.81566 |
| O241 | 0.08009 | 0.54655 | 0.83632 |
| O242 | 0.43458 | 0.37379 | 0.58117 |
| O243 | 0.38819 | 0.49846 | 0.57024 |
| O244 | 0.41601 | 0.62942 | 0.54816 |
| O245 | 0.19816 | 0.3676  | 0.61965 |



|      |         |         |         |
|------|---------|---------|---------|
| O246 | 0.21048 | 0.49593 | 0.57431 |
| O247 | 0.18497 | 0.62639 | 0.55007 |
| O248 | 0.99943 | 0.44356 | 0.79113 |
| O249 | 0.98306 | 0.63001 | 0.78272 |
| O250 | 0.13431 | 0.55556 | 0.21488 |
| O251 | 0.18798 | 0.5468  | 0.39405 |
| O252 | 0.29981 | 0.57716 | 0.48829 |
| O253 | 0.41435 | 0.55359 | 0.39423 |
| O254 | 0.39622 | 0.56531 | 0.20067 |
| O255 | 0.26567 | 0.55264 | 0.2351  |
| O256 | 0.13476 | 0.32437 | 0.2583  |
| O257 | 0.196   | 0.3531  | 0.42454 |
| O258 | 0.3118  | 0.34803 | 0.51911 |
| O259 | 0.41367 | 0.33372 | 0.39442 |
| O260 | 0.39385 | 0.32732 | 0.19953 |
| O261 | 0.26884 | 0.33212 | 0.26431 |
| O262 | 0.19467 | 0.44214 | 0.27156 |
| O263 | 0.41578 | 0.44519 | 0.28345 |
| O264 | 0.07275 | 0.61912 | 0.06605 |
| O265 | 0.08552 | 0.48481 | 0.06314 |
| O266 | 0.11977 | 0.35545 | 0.06624 |
| O267 | 0.31258 | 0.6182  | 0.07569 |
| O268 | 0.3258  | 0.48451 | 0.08965 |
| O269 | 0.29542 | 0.35484 | 0.07075 |
| O270 | 0.5152  | 0.53564 | 0.26949 |
| O271 | 0.51409 | 0.35634 | 0.26891 |
| O272 | 0.44086 | 0.74396 | 0.63649 |
| O273 | 0.1938  | 0.73789 | 0.65279 |
| O274 | 0.27578 | 0.74406 | 0.04739 |
| O275 | 0.11275 | 0.74484 | 0.05055 |
| O276 | 0.06672 | 0.24404 | 0.13767 |
| O277 | 0.30667 | 0.23444 | 0.14347 |
| O278 | 0.22243 | 0.24945 | 0.54829 |
| O279 | 0.39955 | 0.24897 | 0.54653 |
| O280 | 0.56348 | 0.24789 | 0.35642 |
| O281 | 0.80128 | 0.2392  | 0.33184 |
| O282 | 0.72755 | 0.23947 | 0.94734 |
| O283 | 0.88938 | 0.24397 | 0.94196 |
| O284 | 0.93849 | 0.7442  | 0.86068 |
| O285 | 0.69573 | 0.74696 | 0.85957 |
| O286 | 0.77152 | 0.74186 | 0.43762 |
| O287 | 0.60769 | 0.74763 | 0.44611 |
| O288 | 0.97591 | 0.26348 | 0.41288 |
| O289 | 0.93804 | 0.16375 | 0.52021 |

|                                                                                                                                                        |         |         |         |
|--------------------------------------------------------------------------------------------------------------------------------------------------------|---------|---------|---------|
| O290                                                                                                                                                   | 0.87927 | 0.2774  | 0.54016 |
| O291                                                                                                                                                   | 0.99811 | 0.25944 | 0.5977  |
| GA29                                                                                                                                                   | 0.9164  | 0.38823 | 0.6247  |
| H293                                                                                                                                                   | 0.94901 | 0.29349 | 0.36517 |
| H294                                                                                                                                                   | 0.83356 | 0.32542 | 0.48851 |
| H295                                                                                                                                                   | 0.89518 | 0.14623 | 0.49265 |
| H296                                                                                                                                                   | 0.0427  | 0.40412 | 0.59752 |
| H297                                                                                                                                                   | 0.00663 | 0.51987 | 0.64865 |
| H298                                                                                                                                                   | 0.99894 | 0.61016 | 0.52272 |
| H299                                                                                                                                                   | 0.04652 | 0.46608 | 0.2927  |
| H300                                                                                                                                                   | 0.05703 | 0.37662 | 0.41836 |
| H301                                                                                                                                                   | 0.0207  | 0.58412 | 0.34438 |
| H302                                                                                                                                                   | 0.04423 | 0.24992 | 0.57891 |
| AL30                                                                                                                                                   | 0.81915 | 0.32274 | 0.31451 |
| AL30                                                                                                                                                   | 0.79957 | 0.4715  | 0.71367 |
| P305                                                                                                                                                   | 0.9438  | 0.24225 | 0.51459 |
| C306                                                                                                                                                   | 0.01146 | 0.55906 | 0.49982 |
| C307                                                                                                                                                   | 0.03403 | 0.44287 | 0.54163 |
| C308                                                                                                                                                   | 0.01646 | 0.50823 | 0.57056 |
| C309                                                                                                                                                   | 0.03858 | 0.47856 | 0.37075 |
| C310                                                                                                                                                   | 0.02359 | 0.54431 | 0.39976 |
| C311                                                                                                                                                   | 0.04422 | 0.42758 | 0.44132 |
| <b>c) structures associated with the three H<sub>2</sub> formation steps over P/Ga/ZSM-5 in the absence of CO<sub>2</sub> (states shown in Fig. 6)</b> |         |         |         |
| <b>C<sub>6</sub>H<sub>12</sub>+Ga(H)</b>                                                                                                               |         |         |         |
| find above                                                                                                                                             |         |         |         |
| <b>TS1</b>                                                                                                                                             |         |         |         |
| SI2                                                                                                                                                    | 0.4253  | 0.05402 | 0.64365 |
| SI3                                                                                                                                                    | 0.30488 | 0.02309 | 0.78585 |
| SI4                                                                                                                                                    | 0.28158 | 0.05695 | 0.00832 |
| SI5                                                                                                                                                    | 0.12212 | 0.05996 | 0.01122 |
| SI6                                                                                                                                                    | 0.07045 | 0.02503 | 0.79872 |
| SI7                                                                                                                                                    | 0.17927 | 0.05156 | 0.64962 |
| SI8                                                                                                                                                    | 0.42105 | 0.82389 | 0.66912 |
| SI9                                                                                                                                                    | 0.30454 | 0.86564 | 0.80841 |
| SI10                                                                                                                                                   | 0.26818 | 0.8262  | 0.02882 |
| SI11                                                                                                                                                   | 0.11353 | 0.823   | 0.01667 |
| SI12                                                                                                                                                   | 0.06586 | 0.86727 | 0.80197 |
| SI13                                                                                                                                                   | 0.18241 | 0.82475 | 0.67176 |
| SI14                                                                                                                                                   | 0.07628 | 0.93968 | 0.14922 |
| SI15                                                                                                                                                   | 0.19753 | 0.97007 | 0.2915  |
| SI16                                                                                                                                                   | 0.21861 | 0.93351 | 0.5121  |

|      |         |         |         |
|------|---------|---------|---------|
| SI17 | 0.37776 | 0.93106 | 0.51331 |
| SI18 | 0.43077 | 0.96728 | 0.30381 |
| SI19 | 0.3222  | 0.94281 | 0.1529  |
| SI20 | 0.08111 | 0.16907 | 0.16471 |
| SI21 | 0.19724 | 0.12713 | 0.30848 |
| SI22 | 0.23451 | 0.16998 | 0.52594 |
| SI23 | 0.38902 | 0.17167 | 0.51072 |
| SI24 | 0.4362  | 0.12512 | 0.29937 |
| SI25 | 0.31842 | 0.16416 | 0.16803 |
| SI26 | 0.57592 | 0.55634 | 0.34566 |
| SI27 | 0.68665 | 0.53144 | 0.1879  |
| SI28 | 0.71408 | 0.5562  | 0.97338 |
| SI29 | 0.87259 | 0.56137 | 0.97621 |
| SI30 | 0.9329  | 0.52657 | 0.185   |
| SI31 | 0.81263 | 0.55716 | 0.31367 |
| SI32 | 0.57818 | 0.32746 | 0.33042 |
| SI33 | 0.69526 | 0.3736  | 0.18959 |
| SI34 | 0.72819 | 0.32122 | 0.97734 |
| SI35 | 0.88265 | 0.32184 | 0.97635 |
| SI36 | 0.93892 | 0.36805 | 0.18681 |
| SI37 | 0.92389 | 0.43827 | 0.84024 |
| SI38 | 0.77897 | 0.43822 | 0.46843 |
| SI39 | 0.61858 | 0.43342 | 0.48668 |
| SI40 | 0.56878 | 0.46823 | 0.70332 |
| SI41 | 0.67999 | 0.42872 | 0.83772 |
| SI42 | 0.91884 | 0.67048 | 0.82    |
| SI43 | 0.79858 | 0.63622 | 0.686   |
| SI44 | 0.76246 | 0.66619 | 0.46318 |
| SI45 | 0.60779 | 0.6702  | 0.47903 |
| SI46 | 0.56224 | 0.62571 | 0.69706 |
| SI47 | 0.67837 | 0.67491 | 0.8199  |
| SI48 | 0.57625 | 0.93988 | 0.36264 |
| SI49 | 0.69337 | 0.96405 | 0.21978 |
| SI50 | 0.72093 | 0.93452 | 0.997   |
| SI51 | 0.88068 | 0.92869 | 0.99464 |
| SI52 | 0.9315  | 0.96647 | 0.20325 |
| SI53 | 0.82077 | 0.94346 | 0.35595 |
| SI54 | 0.57883 | 0.17162 | 0.33431 |
| SI55 | 0.69556 | 0.11849 | 0.20327 |
| SI56 | 0.73296 | 0.16177 | 0.98217 |
| SI57 | 0.88634 | 0.16731 | 0.98316 |
| SI58 | 0.93632 | 0.12376 | 0.19429 |
| SI59 | 0.81894 | 0.16313 | 0.32873 |
| SI60 | 0.92528 | 0.04813 | 0.85609 |

|      |         |         |         |
|------|---------|---------|---------|
| SI61 | 0.80154 | 0.02059 | 0.71188 |
| SI62 | 0.78317 | 0.06462 | 0.4944  |
| SI63 | 0.62277 | 0.06803 | 0.49082 |
| SI64 | 0.57049 | 0.02613 | 0.70041 |
| SI65 | 0.6782  | 0.04952 | 0.85391 |
| SI66 | 0.9213  | 0.8239  | 0.83603 |
| SI67 | 0.79989 | 0.86269 | 0.69468 |
| SI68 | 0.76604 | 0.82261 | 0.47738 |
| SI69 | 0.6121  | 0.82368 | 0.49545 |
| SI70 | 0.56497 | 0.86919 | 0.70409 |
| SI71 | 0.67896 | 0.8278  | 0.83945 |
| SI72 | 0.42647 | 0.44388 | 0.63986 |
| SI73 | 0.30681 | 0.47121 | 0.78757 |
| SI74 | 0.28931 | 0.43055 | 0.00424 |
| SI75 | 0.13113 | 0.42994 | 0.00925 |
| SI76 | 0.07662 | 0.47141 | 0.80292 |
| SI77 | 0.18322 | 0.44539 | 0.65034 |
| SI78 | 0.42223 | 0.66962 | 0.65849 |
| SI79 | 0.30331 | 0.62764 | 0.79985 |
| SI80 | 0.26965 | 0.67055 | 0.01455 |
| SI81 | 0.11488 | 0.67043 | 0.00706 |
| SI82 | 0.06544 | 0.62803 | 0.79716 |
| SI83 | 0.18234 | 0.66644 | 0.66514 |
| SI84 | 0.08    | 0.55105 | 0.14351 |
| SI85 | 0.20223 | 0.52369 | 0.28441 |
| SI86 | 0.22633 | 0.56208 | 0.50736 |
| SI87 | 0.38471 | 0.56509 | 0.50434 |
| SI88 | 0.43052 | 0.52522 | 0.29126 |
| SI89 | 0.32554 | 0.54993 | 0.13876 |
| SI90 | 0.08499 | 0.32356 | 0.15909 |
| SI91 | 0.19989 | 0.36578 | 0.30511 |
| SI92 | 0.2355  | 0.32636 | 0.52577 |
| SI93 | 0.38991 | 0.32531 | 0.51061 |
| SI94 | 0.43517 | 0.36784 | 0.29342 |
| SI95 | 0.31979 | 0.32234 | 0.16479 |
| O96  | 0.36029 | 0.05902 | 0.71556 |
| O97  | 0.3025  | 0.06273 | 0.89172 |
| O98  | 0.20162 | 0.04527 | 0.02098 |
| O99  | 0.10006 | 0.06474 | 0.89516 |
| O100 | 0.105   | 0.05353 | 0.69771 |
| O101 | 0.23161 | 0.02646 | 0.73461 |
| O102 | 0.36    | 0.82215 | 0.74862 |
| O103 | 0.30534 | 0.84163 | 0.92375 |
| O104 | 0.19043 | 0.84976 | 0.0207  |

|      |         |         |         |
|------|---------|---------|---------|
| O105 | 0.08652 | 0.82742 | 0.90294 |
| O106 | 0.10504 | 0.83443 | 0.70698 |
| O107 | 0.23082 | 0.8529  | 0.76043 |
| O108 | 0.32463 | 0.9446  | 0.80172 |
| O109 | 0.08689 | 0.94556 | 0.8128  |
| O110 | 0.43424 | 0.12378 | 0.58178 |
| O111 | 0.41879 | 0.9925  | 0.56424 |
| O112 | 0.39799 | 0.86075 | 0.56646 |
| O113 | 0.19779 | 0.12656 | 0.61198 |
| O114 | 0.17976 | 0.99875 | 0.55669 |
| O115 | 0.19549 | 0.86489 | 0.56795 |
| O116 | 0.99072 | 0.03667 | 0.78707 |
| O117 | 0.9857  | 0.8606  | 0.78502 |
| O118 | 0.14197 | 0.93615 | 0.21961 |
| O119 | 0.20034 | 0.92689 | 0.39444 |
| O120 | 0.2984  | 0.94477 | 0.52772 |
| O121 | 0.39693 | 0.92602 | 0.39588 |
| O122 | 0.39701 | 0.94347 | 0.19943 |
| O123 | 0.27025 | 0.96869 | 0.23803 |
| O124 | 0.14155 | 0.16744 | 0.24486 |
| O125 | 0.19747 | 0.15909 | 0.41951 |
| O126 | 0.31193 | 0.14572 | 0.51597 |
| O127 | 0.41442 | 0.16953 | 0.39582 |
| O128 | 0.39565 | 0.15118 | 0.20123 |
| O129 | 0.27038 | 0.1359  | 0.25699 |
| O130 | 0.1778  | 0.04788 | 0.31396 |
| O131 | 0.41825 | 0.04706 | 0.32199 |
| O132 | 0.06795 | 0.86863 | 0.09039 |
| O133 | 0.08187 | 0.99974 | 0.06699 |
| O134 | 0.10343 | 0.13128 | 0.06257 |
| O135 | 0.30445 | 0.8667  | 0.11866 |
| O136 | 0.31996 | 0.99268 | 0.05668 |
| O137 | 0.30337 | 0.12617 | 0.06324 |
| O138 | 0.51008 | 0.95195 | 0.29543 |
| O139 | 0.51587 | 0.1344  | 0.27996 |
| O140 | 0.63828 | 0.56616 | 0.27005 |
| O141 | 0.67383 | 0.56437 | 0.07853 |
| O142 | 0.79357 | 0.55702 | 0.99662 |
| O143 | 0.91301 | 0.56306 | 0.08082 |
| O144 | 0.89003 | 0.55843 | 0.27691 |
| O145 | 0.76399 | 0.54696 | 0.21831 |
| O146 | 0.64423 | 0.33252 | 0.26198 |
| O147 | 0.68968 | 0.34015 | 0.07956 |
| O148 | 0.80561 | 0.3482  | 0.97857 |

|      |         |         |         |
|------|---------|---------|---------|
| O149 | 0.91583 | 0.32927 | 0.0859  |
| O150 | 0.90424 | 0.33293 | 0.28364 |
| O151 | 0.77036 | 0.36901 | 0.23052 |
| O152 | 0.67099 | 0.45163 | 0.18534 |
| O153 | 0.91751 | 0.44666 | 0.17786 |
| O154 | 0.56221 | 0.62773 | 0.40096 |
| O155 | 0.5904  | 0.49975 | 0.43055 |
| O156 | 0.58992 | 0.36525 | 0.43679 |
| O157 | 0.79759 | 0.62702 | 0.37094 |
| O158 | 0.8021  | 0.49407 | 0.38917 |
| O159 | 0.8088  | 0.3636  | 0.43264 |
| O160 | 0.01155 | 0.5407  | 0.20691 |
| O161 | 0.01969 | 0.36399 | 0.19842 |
| O162 | 0.87803 | 0.43531 | 0.73747 |
| O163 | 0.81603 | 0.45071 | 0.57416 |
| O164 | 0.69948 | 0.43437 | 0.47804 |
| O165 | 0.5967  | 0.43281 | 0.60238 |
| O166 | 0.60263 | 0.43575 | 0.80149 |
| O167 | 0.72996 | 0.43658 | 0.74502 |
| O168 | 0.86218 | 0.67644 | 0.73393 |
| O169 | 0.80111 | 0.64745 | 0.56558 |
| O170 | 0.68458 | 0.64304 | 0.47297 |
| O171 | 0.57905 | 0.66014 | 0.59057 |
| O172 | 0.60115 | 0.66616 | 0.78459 |
| O173 | 0.72817 | 0.66896 | 0.72415 |
| O174 | 0.80387 | 0.55875 | 0.71728 |
| O175 | 0.58605 | 0.54795 | 0.69704 |
| O176 | 0.92483 | 0.36599 | 0.89526 |
| O177 | 0.89487 | 0.49497 | 0.91365 |
| O178 | 0.89109 | 0.6291  | 0.91572 |
| O179 | 0.68781 | 0.35408 | 0.88526 |
| O180 | 0.69439 | 0.48484 | 0.92394 |
| O181 | 0.69564 | 0.61916 | 0.90309 |
| O182 | 0.48898 | 0.45585 | 0.71416 |
| O183 | 0.48221 | 0.63086 | 0.71733 |
| O184 | 0.63915 | 0.92515 | 0.28895 |
| O185 | 0.69896 | 0.92672 | 0.11272 |
| O186 | 0.80122 | 0.94371 | 0.98394 |
| O187 | 0.90107 | 0.92238 | 0.11155 |
| O188 | 0.89498 | 0.94631 | 0.3073  |
| O189 | 0.76672 | 0.96237 | 0.2705  |
| O190 | 0.64343 | 0.16672 | 0.26168 |
| O191 | 0.69955 | 0.14368 | 0.08881 |
| O192 | 0.81064 | 0.13715 | 0.98274 |

|      |         |         |         |
|------|---------|---------|---------|
| O193 | 0.91493 | 0.16729 | 0.09661 |
| O194 | 0.89508 | 0.14998 | 0.29073 |
| O195 | 0.76863 | 0.12035 | 0.25673 |
| O196 | 0.6687  | 0.04141 | 0.20637 |
| O197 | 0.91956 | 0.04503 | 0.17519 |
| O198 | 0.56416 | 0.87462 | 0.43353 |
| O199 | 0.58906 | 0.00461 | 0.43393 |
| O200 | 0.59465 | 0.13722 | 0.44224 |
| O201 | 0.80729 | 0.86846 | 0.39861 |
| O202 | 0.8165  | 0.99774 | 0.44653 |
| O203 | 0.81513 | 0.1329  | 0.44442 |
| O204 | 0.01068 | 0.95137 | 0.21826 |
| O205 | 0.01583 | 0.13364 | 0.21441 |
| O206 | 0.85981 | 0.04676 | 0.78548 |
| O207 | 0.80131 | 0.06761 | 0.61237 |
| O208 | 0.7032  | 0.06388 | 0.47589 |
| O209 | 0.60403 | 0.06809 | 0.60871 |
| O210 | 0.60369 | 0.04736 | 0.80647 |
| O211 | 0.72983 | 0.02622 | 0.76706 |
| O212 | 0.85901 | 0.83006 | 0.76023 |
| O213 | 0.80097 | 0.82618 | 0.58662 |
| O214 | 0.68922 | 0.84957 | 0.48582 |
| O215 | 0.58995 | 0.82183 | 0.61221 |
| O216 | 0.60263 | 0.84565 | 0.80598 |
| O217 | 0.72812 | 0.85008 | 0.7482  |
| O218 | 0.81302 | 0.94272 | 0.68018 |
| O219 | 0.58305 | 0.94679 | 0.67775 |
| O220 | 0.93218 | 0.12066 | 0.91114 |
| O221 | 0.92155 | 0.98957 | 0.94112 |
| O222 | 0.90126 | 0.85809 | 0.94218 |
| O223 | 0.69337 | 0.12535 | 0.89144 |
| O224 | 0.68344 | 0.99957 | 0.94969 |
| O225 | 0.69757 | 0.86676 | 0.94125 |
| O226 | 0.49144 | 0.04247 | 0.71114 |
| O227 | 0.4847  | 0.86188 | 0.71953 |
| O228 | 0.35877 | 0.44266 | 0.70576 |
| O229 | 0.30949 | 0.42436 | 0.88699 |
| O230 | 0.2101  | 0.44651 | 0.01862 |
| O231 | 0.1102  | 0.42831 | 0.89226 |
| O232 | 0.10759 | 0.44906 | 0.69546 |
| O233 | 0.23218 | 0.46758 | 0.74075 |
| O234 | 0.35485 | 0.66381 | 0.72444 |
| O235 | 0.30636 | 0.66618 | 0.90643 |
| O236 | 0.19245 | 0.64577 | 0.00316 |

|      |         |         |         |
|------|---------|---------|---------|
| O237 | 0.08506 | 0.67283 | 0.89417 |
| O238 | 0.1046  | 0.65442 | 0.69765 |
| O239 | 0.22844 | 0.6337  | 0.75303 |
| O240 | 0.32297 | 0.54904 | 0.81582 |
| O241 | 0.08753 | 0.55108 | 0.82171 |
| O242 | 0.43529 | 0.37252 | 0.58243 |
| O243 | 0.42517 | 0.50346 | 0.55633 |
| O244 | 0.41035 | 0.63638 | 0.54889 |
| O245 | 0.19769 | 0.36967 | 0.61164 |
| O246 | 0.18996 | 0.49652 | 0.55604 |
| O247 | 0.19768 | 0.63039 | 0.55848 |
| O248 | 0.99724 | 0.45679 | 0.79904 |
| O249 | 0.98557 | 0.6331  | 0.77641 |
| O250 | 0.14226 | 0.558   | 0.22055 |
| O251 | 0.21207 | 0.56486 | 0.38823 |
| O252 | 0.30584 | 0.55544 | 0.52879 |
| O253 | 0.39875 | 0.56558 | 0.38554 |
| O254 | 0.39858 | 0.5558  | 0.1899  |
| O255 | 0.27122 | 0.52628 | 0.2217  |
| O256 | 0.1415  | 0.32628 | 0.24563 |
| O257 | 0.20015 | 0.33647 | 0.41784 |
| O258 | 0.31275 | 0.35136 | 0.51685 |
| O259 | 0.41566 | 0.32899 | 0.39604 |
| O260 | 0.39683 | 0.33293 | 0.19972 |
| O261 | 0.27164 | 0.35314 | 0.25167 |
| O262 | 0.18393 | 0.44575 | 0.30755 |
| O263 | 0.41241 | 0.44594 | 0.30314 |
| O264 | 0.07297 | 0.61909 | 0.07712 |
| O265 | 0.08921 | 0.48748 | 0.06807 |
| O266 | 0.11405 | 0.35684 | 0.05667 |
| O267 | 0.30696 | 0.62303 | 0.09459 |
| O268 | 0.33018 | 0.49355 | 0.05121 |
| O269 | 0.30749 | 0.36013 | 0.05877 |
| O270 | 0.51045 | 0.5352  | 0.28246 |
| O271 | 0.51497 | 0.36201 | 0.2731  |
| O272 | 0.44153 | 0.74757 | 0.64091 |
| O273 | 0.19745 | 0.74583 | 0.65166 |
| O274 | 0.2732  | 0.74695 | 0.05557 |
| O275 | 0.10935 | 0.74543 | 0.05406 |
| O276 | 0.06466 | 0.24644 | 0.1359  |
| O277 | 0.30436 | 0.24329 | 0.14925 |
| O278 | 0.23115 | 0.24828 | 0.55868 |
| O279 | 0.39535 | 0.24849 | 0.55028 |
| O280 | 0.56114 | 0.24965 | 0.35484 |



|                                                    |         |         |         |
|----------------------------------------------------|---------|---------|---------|
| O281                                               | 0.79925 | 0.24064 | 0.33112 |
| O282                                               | 0.72849 | 0.24104 | 0.96145 |
| O283                                               | 0.88729 | 0.24389 | 0.94141 |
| O284                                               | 0.93857 | 0.74558 | 0.85702 |
| O285                                               | 0.68679 | 0.74912 | 0.86777 |
| O286                                               | 0.76744 | 0.74574 | 0.43791 |
| O287                                               | 0.60412 | 0.74897 | 0.44879 |
| O288                                               | 0.94589 | 0.25264 | 0.42973 |
| O289                                               | 0.8919  | 0.20665 | 0.58271 |
| O290                                               | 0.89244 | 0.33362 | 0.55531 |
| O291                                               | 0.99839 | 0.27398 | 0.60485 |
| GA29                                               | 0.92316 | 0.42398 | 0.60432 |
| H293                                               | 0.93737 | 0.28722 | 0.37606 |
| H294                                               | 0.84466 | 0.34538 | 0.48978 |
| H295                                               | 0.86494 | 0.18208 | 0.53207 |
| H296                                               | 0.02935 | 0.53882 | 0.60121 |
| H297                                               | 0.09263 | 0.52704 | 0.4419  |
| H298                                               | 0.08    | 0.61341 | 0.47097 |
| H299                                               | 0.03079 | 0.57318 | 0.37784 |
| H300                                               | 0.93305 | 0.62036 | 0.47035 |
| H301                                               | 0.98385 | 0.6526  | 0.56806 |
| H302                                               | 0.91639 | 0.5981  | 0.59651 |
| H303                                               | 0.96046 | 0.4026  | 0.39241 |
| H304                                               | 0.07311 | 0.3609  | 0.41488 |
| H305                                               | 0.91752 | 0.50227 | 0.45875 |
| H306                                               | 0.99782 | 0.38556 | 0.65235 |
| H307                                               | 1.00072 | 0.34144 | 0.63344 |
| H308                                               | 0.09222 | 0.43027 | 0.50302 |
| AL30                                               | 0.81854 | 0.32344 | 0.31108 |
| AL31                                               | 0.79966 | 0.47384 | 0.69901 |
| P311                                               | 0.93562 | 0.26674 | 0.54411 |
| C312                                               | 0.00308 | 0.548   | 0.53008 |
| C313                                               | 0.0549  | 0.56626 | 0.45073 |
| C314                                               | 0.95632 | 0.60799 | 0.54264 |
| C315                                               | 0.99448 | 0.42974 | 0.44204 |
| C316                                               | 0.96256 | 0.48546 | 0.49822 |
| C317                                               | 0.05643 | 0.40572 | 0.45398 |
| <b>C<sub>6</sub>H<sub>11</sub>Ga+H<sub>2</sub></b> |         |         |         |
| find above                                         |         |         |         |
| <b>C<sub>6</sub>H<sub>10</sub>+Ga(H)</b>           |         |         |         |
| find above                                         |         |         |         |

**TS2**

|      |         |         |         |
|------|---------|---------|---------|
| SI2  | 0.42576 | 0.05254 | 0.64286 |
| SI3  | 0.30489 | 0.02161 | 0.78317 |
| SI4  | 0.28201 | 0.05304 | 0.00747 |
| SI5  | 0.12246 | 0.05779 | 0.00958 |
| SI6  | 0.07078 | 0.02312 | 0.79677 |
| SI7  | 0.17877 | 0.05046 | 0.64663 |
| SI8  | 0.42221 | 0.82149 | 0.66987 |
| SI9  | 0.30532 | 0.86369 | 0.80779 |
| SI10 | 0.26931 | 0.82543 | 0.02913 |
| SI11 | 0.11488 | 0.82209 | 0.0183  |
| SI12 | 0.06618 | 0.86481 | 0.80265 |
| SI13 | 0.18262 | 0.82092 | 0.67281 |
| SI14 | 0.07657 | 0.93864 | 0.14973 |
| SI15 | 0.1981  | 0.96759 | 0.29344 |
| SI16 | 0.21855 | 0.93021 | 0.51309 |
| SI17 | 0.37766 | 0.92886 | 0.51439 |
| SI18 | 0.4309  | 0.96557 | 0.30556 |
| SI19 | 0.32263 | 0.9401  | 0.15415 |
| SI20 | 0.08243 | 0.16743 | 0.16168 |
| SI21 | 0.19895 | 0.1241  | 0.3064  |
| SI22 | 0.23448 | 0.16932 | 0.52241 |
| SI23 | 0.38908 | 0.17008 | 0.50967 |
| SI24 | 0.43713 | 0.12327 | 0.29972 |
| SI25 | 0.32005 | 0.15952 | 0.16628 |
| SI26 | 0.5778  | 0.55832 | 0.33627 |
| SI27 | 0.68231 | 0.53207 | 0.17415 |
| SI28 | 0.71464 | 0.5511  | 0.95892 |
| SI29 | 0.87126 | 0.55651 | 0.9665  |
| SI30 | 0.92994 | 0.5251  | 0.17684 |
| SI31 | 0.8064  | 0.55614 | 0.30288 |
| SI32 | 0.5765  | 0.32703 | 0.32151 |
| SI33 | 0.69231 | 0.37362 | 0.17981 |
| SI34 | 0.72649 | 0.32041 | 0.97089 |
| SI35 | 0.88105 | 0.31973 | 0.9683  |
| SI36 | 0.93868 | 0.36646 | 0.17743 |
| SI37 | 0.92255 | 0.43472 | 0.82651 |
| SI38 | 0.7758  | 0.43412 | 0.45747 |
| SI39 | 0.61799 | 0.43435 | 0.47754 |
| SI40 | 0.56662 | 0.46789 | 0.69664 |
| SI41 | 0.67989 | 0.42368 | 0.82171 |
| SI42 | 0.91806 | 0.66778 | 0.81742 |
| SI43 | 0.80298 | 0.63463 | 0.67608 |

|      |         |         |         |
|------|---------|---------|---------|
| SI44 | 0.76508 | 0.66515 | 0.45743 |
| SI45 | 0.60994 | 0.66927 | 0.47672 |
| SI46 | 0.5659  | 0.62464 | 0.69639 |
| SI47 | 0.68555 | 0.67466 | 0.81077 |
| SI48 | 0.57716 | 0.93899 | 0.36353 |
| SI49 | 0.69383 | 0.96233 | 0.22033 |
| SI50 | 0.72163 | 0.93211 | 0.99723 |
| SI51 | 0.88118 | 0.9263  | 0.99527 |
| SI52 | 0.93176 | 0.96721 | 0.20302 |
| SI53 | 0.82164 | 0.94375 | 0.35746 |
| SI54 | 0.57942 | 0.17103 | 0.33538 |
| SI55 | 0.69653 | 0.1168  | 0.20478 |
| SI56 | 0.73187 | 0.16045 | 0.98362 |
| SI57 | 0.88554 | 0.16588 | 0.984   |
| SI58 | 0.93696 | 0.1243  | 0.19398 |
| SI59 | 0.81996 | 0.16214 | 0.32847 |
| SI60 | 0.92572 | 0.04622 | 0.85719 |
| SI61 | 0.80269 | 0.02028 | 0.71165 |
| SI62 | 0.78396 | 0.06589 | 0.49493 |
| SI63 | 0.62332 | 0.06818 | 0.49099 |
| SI64 | 0.57099 | 0.02395 | 0.70054 |
| SI65 | 0.67886 | 0.04735 | 0.85369 |
| SI66 | 0.92115 | 0.82139 | 0.83804 |
| SI67 | 0.80123 | 0.8632  | 0.69504 |
| SI68 | 0.76898 | 0.82175 | 0.47794 |
| SI69 | 0.6148  | 0.82296 | 0.49667 |
| SI70 | 0.56683 | 0.86652 | 0.70554 |
| SI71 | 0.68156 | 0.82675 | 0.83892 |
| SI72 | 0.42377 | 0.44187 | 0.64326 |
| SI73 | 0.30846 | 0.46929 | 0.79839 |
| SI74 | 0.2893  | 0.42929 | 0.01253 |
| SI75 | 0.13272 | 0.43037 | 0.01355 |
| SI76 | 0.07672 | 0.46553 | 0.80507 |
| SI77 | 0.18859 | 0.44151 | 0.66113 |
| SI78 | 0.42615 | 0.66673 | 0.65941 |
| SI79 | 0.30363 | 0.62493 | 0.79649 |
| SI80 | 0.27073 | 0.67017 | 0.00934 |
| SI81 | 0.11652 | 0.66861 | 0.01012 |
| SI82 | 0.06585 | 0.62342 | 0.80146 |
| SI83 | 0.18066 | 0.66248 | 0.66386 |
| SI84 | 0.07815 | 0.55079 | 0.14635 |
| SI85 | 0.20227 | 0.52404 | 0.28292 |
| SI86 | 0.22678 | 0.56006 | 0.51168 |
| SI87 | 0.38484 | 0.56404 | 0.50591 |

|      |         |         |         |
|------|---------|---------|---------|
| SI88 | 0.42919 | 0.52421 | 0.29229 |
| SI89 | 0.32758 | 0.55255 | 0.13861 |
| SI90 | 0.08661 | 0.32232 | 0.16242 |
| SI91 | 0.19803 | 0.36355 | 0.31009 |
| SI92 | 0.2364  | 0.32704 | 0.52856 |
| SI93 | 0.3913  | 0.32407 | 0.51193 |
| SI94 | 0.43401 | 0.36674 | 0.29228 |
| SI95 | 0.31606 | 0.31646 | 0.17078 |
| O96  | 0.361   | 0.05839 | 0.71515 |
| O97  | 0.30247 | 0.05858 | 0.89089 |
| O98  | 0.2019  | 0.04384 | 0.02171 |
| O99  | 0.10195 | 0.06171 | 0.89293 |
| O100 | 0.10464 | 0.05207 | 0.69546 |
| O101 | 0.23187 | 0.02771 | 0.73195 |
| O102 | 0.36164 | 0.8198  | 0.75036 |
| O103 | 0.30634 | 0.84309 | 0.92464 |
| O104 | 0.19158 | 0.84952 | 0.02241 |
| O105 | 0.08757 | 0.8268  | 0.9048  |
| O106 | 0.10544 | 0.83066 | 0.70879 |
| O107 | 0.23171 | 0.8484  | 0.76105 |
| O108 | 0.32394 | 0.94267 | 0.79533 |
| O109 | 0.08657 | 0.94346 | 0.80933 |
| O110 | 0.43465 | 0.12185 | 0.57978 |
| O111 | 0.4186  | 0.99069 | 0.56424 |
| O112 | 0.39892 | 0.85897 | 0.56781 |
| O113 | 0.19568 | 0.12518 | 0.60574 |
| O114 | 0.17944 | 0.99572 | 0.55622 |
| O115 | 0.1954  | 0.8617  | 0.56939 |
| O116 | 0.99109 | 0.03611 | 0.78745 |
| O117 | 0.98601 | 0.85722 | 0.78702 |
| O118 | 0.14187 | 0.93574 | 0.22082 |
| O119 | 0.20078 | 0.92298 | 0.39518 |
| O120 | 0.29823 | 0.94185 | 0.52972 |
| O121 | 0.39598 | 0.92406 | 0.39657 |
| O122 | 0.39748 | 0.94282 | 0.20034 |
| O123 | 0.27051 | 0.96592 | 0.23905 |
| O124 | 0.14394 | 0.16266 | 0.23948 |
| O125 | 0.19909 | 0.16034 | 0.41441 |
| O126 | 0.31187 | 0.14435 | 0.51606 |
| O127 | 0.41381 | 0.16875 | 0.39434 |
| O128 | 0.39734 | 0.14798 | 0.20013 |
| O129 | 0.27228 | 0.13026 | 0.25482 |
| O130 | 0.17942 | 0.04527 | 0.31895 |
| O131 | 0.41937 | 0.04543 | 0.32462 |

|      |         |         |         |
|------|---------|---------|---------|
| O132 | 0.06883 | 0.86685 | 0.09264 |
| O133 | 0.08239 | 0.99757 | 0.06568 |
| O134 | 0.10207 | 0.12938 | 0.05855 |
| O135 | 0.30599 | 0.86346 | 0.1211  |
| O136 | 0.31907 | 0.98808 | 0.05593 |
| O137 | 0.30623 | 0.12156 | 0.06144 |
| O138 | 0.51001 | 0.94935 | 0.29792 |
| O139 | 0.51684 | 0.13284 | 0.28132 |
| O140 | 0.63163 | 0.5715  | 0.24823 |
| O141 | 0.67094 | 0.55895 | 0.06091 |
| O142 | 0.79299 | 0.54517 | 0.9891  |
| O143 | 0.91289 | 0.56001 | 0.0703  |
| O144 | 0.88358 | 0.55534 | 0.26572 |
| O145 | 0.75869 | 0.55033 | 0.20598 |
| O146 | 0.64169 | 0.33079 | 0.25091 |
| O147 | 0.68391 | 0.34603 | 0.06628 |
| O148 | 0.8042  | 0.34536 | 0.97857 |
| O149 | 0.91943 | 0.3294  | 0.0737  |
| O150 | 0.90279 | 0.33139 | 0.27323 |
| O151 | 0.76799 | 0.3648  | 0.21691 |
| O152 | 0.66866 | 0.45205 | 0.18394 |
| O153 | 0.91688 | 0.44487 | 0.16948 |
| O154 | 0.56573 | 0.62879 | 0.3947  |
| O155 | 0.6038  | 0.50265 | 0.41567 |
| O156 | 0.58693 | 0.36841 | 0.42496 |
| O157 | 0.79515 | 0.6265  | 0.361   |
| O158 | 0.79016 | 0.49312 | 0.37734 |
| O159 | 0.80728 | 0.36229 | 0.42067 |
| O160 | 0.0076  | 0.54085 | 0.20482 |
| O161 | 0.01919 | 0.36259 | 0.19298 |
| O162 | 0.87727 | 0.43539 | 0.72382 |
| O163 | 0.81514 | 0.45076 | 0.56217 |
| O164 | 0.69832 | 0.42622 | 0.48419 |
| O165 | 0.5861  | 0.4385  | 0.58762 |
| O166 | 0.60231 | 0.42605 | 0.78512 |
| O167 | 0.7289  | 0.43322 | 0.72826 |
| O168 | 0.86785 | 0.67341 | 0.72263 |
| O169 | 0.80789 | 0.64243 | 0.55487 |
| O170 | 0.68725 | 0.64351 | 0.47302 |
| O171 | 0.57944 | 0.65535 | 0.58634 |
| O172 | 0.60777 | 0.6673  | 0.7781  |
| O173 | 0.73373 | 0.671   | 0.71251 |
| O174 | 0.80369 | 0.55746 | 0.70977 |
| O175 | 0.58886 | 0.54654 | 0.7018  |

|      |         |         |         |
|------|---------|---------|---------|
| O176 | 0.91773 | 0.36217 | 0.88044 |
| O177 | 0.8976  | 0.4935  | 0.90048 |
| O178 | 0.883   | 0.6269  | 0.90827 |
| O179 | 0.69192 | 0.35024 | 0.87137 |
| O180 | 0.69158 | 0.4827  | 0.90434 |
| O181 | 0.70456 | 0.6171  | 0.89053 |
| O182 | 0.48669 | 0.46017 | 0.71389 |
| O183 | 0.48672 | 0.63189 | 0.72213 |
| O184 | 0.63902 | 0.9233  | 0.28834 |
| O185 | 0.69994 | 0.9253  | 0.11312 |
| O186 | 0.80186 | 0.94162 | 0.98343 |
| O187 | 0.90101 | 0.92216 | 0.11258 |
| O188 | 0.8955  | 0.94859 | 0.30784 |
| O189 | 0.76674 | 0.96011 | 0.2722  |
| O190 | 0.64497 | 0.16459 | 0.26503 |
| O191 | 0.69861 | 0.14243 | 0.09035 |
| O192 | 0.80971 | 0.13627 | 0.98501 |
| O193 | 0.91425 | 0.16859 | 0.0975  |
| O194 | 0.8969  | 0.14939 | 0.29228 |
| O195 | 0.77029 | 0.11832 | 0.25622 |
| O196 | 0.66955 | 0.03976 | 0.20723 |
| O197 | 0.92045 | 0.0456  | 0.173   |
| O198 | 0.56648 | 0.87482 | 0.43718 |
| O199 | 0.59078 | 0.00515 | 0.43149 |
| O200 | 0.59407 | 0.13778 | 0.44467 |
| O201 | 0.81089 | 0.8685  | 0.40119 |
| O202 | 0.8161  | 0.99805 | 0.44767 |
| O203 | 0.81683 | 0.13294 | 0.44413 |
| O204 | 0.01085 | 0.95147 | 0.21792 |
| O205 | 0.01659 | 0.13418 | 0.21292 |
| O206 | 0.86028 | 0.04672 | 0.78639 |
| O207 | 0.80259 | 0.06828 | 0.61309 |
| O208 | 0.70386 | 0.06574 | 0.47708 |
| O209 | 0.60441 | 0.06567 | 0.60868 |
| O210 | 0.60431 | 0.04556 | 0.80632 |
| O211 | 0.73074 | 0.02476 | 0.76654 |
| O212 | 0.85867 | 0.82966 | 0.76299 |
| O213 | 0.80234 | 0.8247  | 0.58844 |
| O214 | 0.69196 | 0.84833 | 0.48517 |
| O215 | 0.59343 | 0.82004 | 0.61367 |
| O216 | 0.60434 | 0.84237 | 0.80735 |
| O217 | 0.72884 | 0.8541  | 0.74836 |
| O218 | 0.81616 | 0.94284 | 0.67853 |
| O219 | 0.58379 | 0.94444 | 0.67972 |

|      |         |         |         |
|------|---------|---------|---------|
| O220 | 0.93208 | 0.11765 | 0.9153  |
| O221 | 0.92239 | 0.98594 | 0.93937 |
| O222 | 0.90208 | 0.85485 | 0.94524 |
| O223 | 0.69348 | 0.12294 | 0.89269 |
| O224 | 0.68389 | 0.99647 | 0.94838 |
| O225 | 0.69856 | 0.86351 | 0.94324 |
| O226 | 0.49189 | 0.04053 | 0.71024 |
| O227 | 0.48657 | 0.85837 | 0.72001 |
| O228 | 0.35751 | 0.44116 | 0.71231 |
| O229 | 0.31483 | 0.42251 | 0.89753 |
| O230 | 0.21099 | 0.45144 | 0.0171  |
| O231 | 0.10833 | 0.42453 | 0.89844 |
| O232 | 0.11161 | 0.44306 | 0.70027 |
| O233 | 0.23251 | 0.46411 | 0.75702 |
| O234 | 0.35757 | 0.65785 | 0.72164 |
| O235 | 0.30126 | 0.67036 | 0.89691 |
| O236 | 0.19388 | 0.6429  | 0.00826 |
| O237 | 0.08699 | 0.66866 | 0.89716 |
| O238 | 0.10423 | 0.65097 | 0.70221 |
| O239 | 0.23025 | 0.62634 | 0.74412 |
| O240 | 0.32386 | 0.54784 | 0.82464 |
| O241 | 0.08602 | 0.54573 | 0.82363 |
| O242 | 0.43361 | 0.36886 | 0.5912  |
| O243 | 0.41819 | 0.49716 | 0.55408 |
| O244 | 0.41948 | 0.6313  | 0.55035 |
| O245 | 0.20585 | 0.36604 | 0.62457 |
| O246 | 0.2003  | 0.4924  | 0.56758 |
| O247 | 0.19025 | 0.62708 | 0.55514 |
| O248 | 0.99876 | 0.44736 | 0.79376 |
| O249 | 0.98598 | 0.62912 | 0.7821  |
| O250 | 0.13826 | 0.55767 | 0.22732 |
| O251 | 0.21115 | 0.55625 | 0.39334 |
| O252 | 0.30606 | 0.56572 | 0.5329  |
| O253 | 0.39619 | 0.56296 | 0.38679 |
| O254 | 0.39942 | 0.55927 | 0.19277 |
| O255 | 0.26936 | 0.5399  | 0.2206  |
| O256 | 0.13653 | 0.32396 | 0.25793 |
| O257 | 0.19466 | 0.34763 | 0.42879 |
| O258 | 0.3138  | 0.34933 | 0.51146 |
| O259 | 0.42104 | 0.33139 | 0.39996 |
| O260 | 0.39289 | 0.32867 | 0.20439 |
| O261 | 0.26886 | 0.3384  | 0.26442 |
| O262 | 0.19024 | 0.44349 | 0.28924 |
| O263 | 0.40996 | 0.44479 | 0.29768 |

|      |         |         |         |
|------|---------|---------|---------|
| O264 | 0.07311 | 0.61926 | 0.08099 |
| O265 | 0.08941 | 0.48721 | 0.07172 |
| O266 | 0.12198 | 0.35765 | 0.06627 |
| O267 | 0.31508 | 0.62185 | 0.07929 |
| O268 | 0.33259 | 0.48855 | 0.06406 |
| O269 | 0.29928 | 0.35832 | 0.06974 |
| O270 | 0.50906 | 0.53235 | 0.28726 |
| O271 | 0.51256 | 0.35976 | 0.26358 |
| O272 | 0.44183 | 0.74526 | 0.64016 |
| O273 | 0.19706 | 0.74182 | 0.65241 |
| O274 | 0.2739  | 0.74581 | 0.05317 |
| O275 | 0.11154 | 0.74429 | 0.05451 |
| O276 | 0.06854 | 0.24548 | 0.13403 |
| O277 | 0.30413 | 0.23801 | 0.14606 |
| O278 | 0.23077 | 0.24776 | 0.55365 |
| O279 | 0.39586 | 0.24673 | 0.54929 |
| O280 | 0.56153 | 0.24954 | 0.35157 |
| O281 | 0.79999 | 0.23945 | 0.32646 |
| O282 | 0.72547 | 0.23965 | 0.96312 |
| O283 | 0.88574 | 0.24104 | 0.93713 |
| O284 | 0.93684 | 0.74246 | 0.85704 |
| O285 | 0.69436 | 0.74789 | 0.86168 |
| O286 | 0.77151 | 0.74519 | 0.43688 |
| O287 | 0.60613 | 0.74851 | 0.44954 |
| O288 | 0.96078 | 0.26628 | 0.42055 |
| O289 | 0.93745 | 0.20322 | 0.57836 |
| O290 | 0.87933 | 0.31675 | 0.54968 |
| O291 | 1.00134 | 0.31183 | 0.59308 |
| GA29 | 0.91178 | 0.4216  | 0.57735 |
| H293 | 0.94157 | 0.29589 | 0.36525 |
| H294 | 0.84411 | 0.33116 | 0.48808 |
| H295 | 0.90587 | 0.17519 | 0.54042 |
| H296 | 0.98978 | 0.45595 | 0.61462 |
| H297 | 0.98888 | 0.38103 | 0.60437 |
| H298 | 0.11653 | 0.48045 | 0.42784 |
| H299 | 0.05738 | 0.53276 | 0.36739 |
| H300 | 0.06875 | 0.59294 | 0.51354 |
| H301 | 0.08914 | 0.52318 | 0.58686 |
| H302 | 0.97111 | 0.57593 | 0.61999 |
| H303 | 0.91093 | 0.44949 | 0.37622 |
| H304 | 0.02419 | 0.41505 | 0.34947 |
| H305 | 0.88582 | 0.54367 | 0.49687 |
| H306 | 0.03349 | 0.40168 | 0.47752 |
| AL30 | 0.81664 | 0.32232 | 0.30142 |



|                                                   |         |         |         |
|---------------------------------------------------|---------|---------|---------|
| AL30                                              | 0.79901 | 0.47293 | 0.68909 |
| P309                                              | 0.94712 | 0.27597 | 0.5344  |
| C310                                              | 0.98448 | 0.53929 | 0.56261 |
| C311                                              | 0.06545 | 0.49961 | 0.43154 |
| C312                                              | 0.05588 | 0.53989 | 0.52749 |
| C313                                              | 0.94616 | 0.46181 | 0.43547 |
| C314                                              | 0.93535 | 0.52092 | 0.49337 |
| C315                                              | 0.01804 | 0.43964 | 0.42229 |
| <b>C<sub>6</sub>H<sub>9</sub>Ga+H<sub>2</sub></b> |         |         |         |
| find above                                        |         |         |         |
| <b>C<sub>6</sub>H<sub>8</sub>+Ga(H)</b>           |         |         |         |
| find above                                        |         |         |         |
| <b>TS3</b>                                        |         |         |         |
| SI2                                               | 0.4259  | 0.05134 | 0.64438 |
| SI3                                               | 0.30391 | 0.02083 | 0.78324 |
| SI4                                               | 0.28178 | 0.05287 | 0.00864 |
| SI5                                               | 0.12169 | 0.05739 | 0.00996 |
| SI6                                               | 0.07058 | 0.01989 | 0.79658 |
| SI7                                               | 0.17752 | 0.04933 | 0.64493 |
| SI8                                               | 0.42046 | 0.82033 | 0.66919 |
| SI9                                               | 0.30351 | 0.86224 | 0.80819 |
| SI10                                              | 0.26959 | 0.82443 | 0.02995 |
| SI11                                              | 0.11527 | 0.82078 | 0.01776 |
| SI12                                              | 0.06526 | 0.86117 | 0.80176 |
| SI13                                              | 0.18199 | 0.81865 | 0.67409 |
| SI14                                              | 0.07724 | 0.93698 | 0.15009 |
| SI15                                              | 0.19838 | 0.96487 | 0.29511 |
| SI16                                              | 0.21877 | 0.92799 | 0.51378 |
| SI17                                              | 0.37802 | 0.92792 | 0.51418 |
| SI18                                              | 0.43214 | 0.96663 | 0.30557 |
| SI19                                              | 0.32278 | 0.93899 | 0.15527 |
| SI20                                              | 0.0811  | 0.16367 | 0.16273 |
| SI21                                              | 0.20052 | 0.12089 | 0.30448 |
| SI22                                              | 0.23285 | 0.16854 | 0.52051 |
| SI23                                              | 0.3874  | 0.16938 | 0.51242 |
| SI24                                              | 0.43804 | 0.12489 | 0.30299 |
| SI25                                              | 0.3218  | 0.1572  | 0.16727 |
| SI26                                              | 0.57223 | 0.56122 | 0.32724 |
| SI27                                              | 0.67304 | 0.53154 | 0.16649 |
| SI28                                              | 0.71377 | 0.54917 | 0.95117 |
| SI29                                              | 0.86802 | 0.54671 | 0.95056 |

|      |         |         |         |
|------|---------|---------|---------|
| SI30 | 0.92637 | 0.52106 | 0.16159 |
| SI31 | 0.80243 | 0.55669 | 0.29393 |
| SI32 | 0.5809  | 0.32841 | 0.31888 |
| SI33 | 0.68776 | 0.37449 | 0.17113 |
| SI34 | 0.73167 | 0.32152 | 0.96534 |
| SI35 | 0.88496 | 0.31477 | 0.99346 |
| SI36 | 0.93367 | 0.36358 | 0.19244 |
| SI37 | 0.92492 | 0.41456 | 0.84769 |
| SI38 | 0.77773 | 0.44155 | 0.45996 |
| SI39 | 0.62333 | 0.4427  | 0.46954 |
| SI40 | 0.57214 | 0.46543 | 0.68651 |
| SI41 | 0.69355 | 0.42234 | 0.8085  |
| SI42 | 0.91615 | 0.66435 | 0.80891 |
| SI43 | 0.79899 | 0.64361 | 0.6673  |
| SI44 | 0.76201 | 0.6688  | 0.44574 |
| SI45 | 0.6071  | 0.67012 | 0.46863 |
| SI46 | 0.5668  | 0.62209 | 0.68968 |
| SI47 | 0.68396 | 0.67625 | 0.8093  |
| SI48 | 0.57734 | 0.94054 | 0.36515 |
| SI49 | 0.69489 | 0.96297 | 0.22342 |
| SI50 | 0.72127 | 0.93152 | 0.99983 |
| SI51 | 0.88132 | 0.92305 | 0.99711 |
| SI52 | 0.9322  | 0.96267 | 0.2061  |
| SI53 | 0.82281 | 0.94423 | 0.36016 |
| SI54 | 0.58144 | 0.17359 | 0.34139 |
| SI55 | 0.69712 | 0.11772 | 0.20789 |
| SI56 | 0.7321  | 0.1614  | 0.9864  |
| SI57 | 0.88693 | 0.16291 | 0.98518 |
| SI58 | 0.93768 | 0.11992 | 0.19778 |
| SI59 | 0.82074 | 0.16364 | 0.32999 |
| SI60 | 0.92484 | 0.04185 | 0.85706 |
| SI61 | 0.80061 | 0.01702 | 0.70997 |
| SI62 | 0.78529 | 0.06754 | 0.49533 |
| SI63 | 0.62464 | 0.06862 | 0.49359 |
| SI64 | 0.57155 | 0.02387 | 0.70295 |
| SI65 | 0.67916 | 0.04804 | 0.85615 |
| SI66 | 0.91887 | 0.81807 | 0.83812 |
| SI67 | 0.79669 | 0.85974 | 0.69556 |
| SI68 | 0.76522 | 0.82171 | 0.47893 |
| SI69 | 0.61139 | 0.82387 | 0.49847 |
| SI70 | 0.56403 | 0.8665  | 0.70744 |
| SI71 | 0.67712 | 0.82575 | 0.84388 |
| SI72 | 0.42798 | 0.43992 | 0.65366 |
| SI73 | 0.31044 | 0.46807 | 0.806   |

|      |         |         |         |
|------|---------|---------|---------|
| SI74 | 0.28899 | 0.42655 | 0.02083 |
| SI75 | 0.13124 | 0.4278  | 0.02637 |
| SI76 | 0.07387 | 0.46151 | 0.81715 |
| SI77 | 0.18664 | 0.43855 | 0.67098 |
| SI78 | 0.4251  | 0.66541 | 0.65912 |
| SI79 | 0.30435 | 0.62382 | 0.80016 |
| SI80 | 0.2689  | 0.6695  | 0.01024 |
| SI81 | 0.11466 | 0.66719 | 0.01134 |
| SI82 | 0.06411 | 0.6207  | 0.80275 |
| SI83 | 0.18139 | 0.66027 | 0.66627 |
| SI84 | 0.07461 | 0.55091 | 0.1542  |
| SI85 | 0.19536 | 0.52165 | 0.28914 |
| SI86 | 0.2228  | 0.55506 | 0.51986 |
| SI87 | 0.38093 | 0.55947 | 0.5152  |
| SI88 | 0.42263 | 0.52148 | 0.29785 |
| SI89 | 0.32106 | 0.55215 | 0.14493 |
| SI90 | 0.08243 | 0.31857 | 0.17288 |
| SI91 | 0.19538 | 0.36179 | 0.3132  |
| SI92 | 0.23536 | 0.32664 | 0.53248 |
| SI93 | 0.39021 | 0.32336 | 0.51977 |
| SI94 | 0.43279 | 0.36492 | 0.29956 |
| SI95 | 0.31623 | 0.31344 | 0.17681 |
| O96  | 0.36164 | 0.05696 | 0.71763 |
| O97  | 0.30075 | 0.05688 | 0.89149 |
| O98  | 0.20151 | 0.04798 | 0.0258  |
| O99  | 0.10312 | 0.0576  | 0.89249 |
| O100 | 0.10379 | 0.04967 | 0.69528 |
| O101 | 0.23188 | 0.02962 | 0.72995 |
| O102 | 0.35881 | 0.81866 | 0.74792 |
| O103 | 0.30664 | 0.84166 | 0.92512 |
| O104 | 0.19185 | 0.84872 | 0.02289 |
| O105 | 0.08853 | 0.82427 | 0.90385 |
| O106 | 0.10407 | 0.82749 | 0.70702 |
| O107 | 0.22915 | 0.84645 | 0.76452 |
| O108 | 0.32103 | 0.9414  | 0.7946  |
| O109 | 0.08523 | 0.93997 | 0.80729 |
| O110 | 0.4336  | 0.1202  | 0.5799  |
| O111 | 0.41894 | 0.98856 | 0.56736 |
| O112 | 0.39818 | 0.85696 | 0.56581 |
| O113 | 0.19146 | 0.12378 | 0.60033 |
| O114 | 0.17897 | 0.99312 | 0.55671 |
| O115 | 0.19689 | 0.85961 | 0.57147 |
| O116 | 0.99093 | 0.03274 | 0.78875 |
| O117 | 0.98523 | 0.85154 | 0.7877  |

|      |         |         |         |
|------|---------|---------|---------|
| O118 | 0.14253 | 0.93376 | 0.22116 |
| O119 | 0.20014 | 0.91969 | 0.39631 |
| O120 | 0.29846 | 0.94117 | 0.52816 |
| O121 | 0.39762 | 0.92482 | 0.39667 |
| O122 | 0.39786 | 0.9443  | 0.20054 |
| O123 | 0.27102 | 0.963   | 0.24166 |
| O124 | 0.1462  | 0.15733 | 0.23367 |
| O125 | 0.2007  | 0.16081 | 0.40986 |
| O126 | 0.31028 | 0.14336 | 0.51916 |
| O127 | 0.41145 | 0.16957 | 0.39666 |
| O128 | 0.3993  | 0.14821 | 0.20177 |
| O129 | 0.27418 | 0.12444 | 0.25335 |
| O130 | 0.18059 | 0.0426  | 0.32238 |
| O131 | 0.42192 | 0.04647 | 0.32645 |
| O132 | 0.06901 | 0.86597 | 0.09116 |
| O133 | 0.08334 | 0.99669 | 0.06752 |
| O134 | 0.09658 | 0.12873 | 0.0554  |
| O135 | 0.30728 | 0.86217 | 0.12146 |
| O136 | 0.3165  | 0.98659 | 0.05698 |
| O137 | 0.31043 | 0.12041 | 0.06074 |
| O138 | 0.51131 | 0.9505  | 0.29673 |
| O139 | 0.51757 | 0.13745 | 0.28784 |
| O140 | 0.61813 | 0.57385 | 0.22954 |
| O141 | 0.6677  | 0.55528 | 0.05096 |
| O142 | 0.7912  | 0.54389 | 0.98766 |
| O143 | 0.91702 | 0.54725 | 0.04751 |
| O144 | 0.87431 | 0.55611 | 0.23858 |
| O145 | 0.74657 | 0.55039 | 0.20856 |
| O146 | 0.63509 | 0.32556 | 0.22938 |
| O147 | 0.68695 | 0.35311 | 0.05447 |
| O148 | 0.8097  | 0.34377 | 0.97926 |
| O149 | 0.90376 | 0.31048 | 0.11164 |
| O150 | 0.8963  | 0.34385 | 0.29675 |
| O151 | 0.7616  | 0.36687 | 0.21744 |
| O152 | 0.66001 | 0.45151 | 0.18105 |
| O153 | 0.91535 | 0.44012 | 0.16081 |
| O154 | 0.56142 | 0.63198 | 0.38569 |
| O155 | 0.60707 | 0.50756 | 0.40172 |
| O156 | 0.61045 | 0.37277 | 0.41113 |
| O157 | 0.79591 | 0.62704 | 0.35461 |
| O158 | 0.79651 | 0.49292 | 0.37129 |
| O159 | 0.78923 | 0.36224 | 0.42336 |
| O160 | 0.00047 | 0.54144 | 0.20077 |
| O161 | 0.014   | 0.35681 | 0.20513 |

|      |         |         |         |
|------|---------|---------|---------|
| O162 | 0.88774 | 0.36744 | 0.76598 |
| O163 | 0.82727 | 0.44848 | 0.55613 |
| O164 | 0.7021  | 0.44989 | 0.49874 |
| O165 | 0.57888 | 0.44288 | 0.56993 |
| O166 | 0.61996 | 0.4206  | 0.75621 |
| O167 | 0.75214 | 0.43311 | 0.72907 |
| O168 | 0.86861 | 0.67382 | 0.7118  |
| O169 | 0.803   | 0.65322 | 0.54709 |
| O170 | 0.68443 | 0.64531 | 0.4573  |
| O171 | 0.58015 | 0.65138 | 0.57869 |
| O172 | 0.6076  | 0.66598 | 0.77104 |
| O173 | 0.73426 | 0.68325 | 0.71347 |
| O174 | 0.7907  | 0.56597 | 0.69432 |
| O175 | 0.59148 | 0.54458 | 0.69713 |
| O176 | 0.9382  | 0.3678  | 0.94596 |
| O177 | 0.8815  | 0.48165 | 0.87898 |
| O178 | 0.88045 | 0.61663 | 0.89117 |
| O179 | 0.7023  | 0.34915 | 0.86105 |
| O180 | 0.69224 | 0.48185 | 0.89255 |
| O181 | 0.70506 | 0.61597 | 0.88345 |
| O182 | 0.49478 | 0.45302 | 0.71931 |
| O183 | 0.4874  | 0.62815 | 0.71439 |
| O184 | 0.64043 | 0.92416 | 0.29254 |
| O185 | 0.70001 | 0.9261  | 0.11604 |
| O186 | 0.8018  | 0.93739 | 0.98541 |
| O187 | 0.90165 | 0.91871 | 0.11425 |
| O188 | 0.89672 | 0.94173 | 0.31049 |
| O189 | 0.76824 | 0.95995 | 0.27403 |
| O190 | 0.64605 | 0.16531 | 0.26946 |
| O191 | 0.69892 | 0.14378 | 0.0936  |
| O192 | 0.80982 | 0.13686 | 0.98763 |
| O193 | 0.91801 | 0.16027 | 0.09684 |
| O194 | 0.8973  | 0.1499  | 0.29302 |
| O195 | 0.77094 | 0.11905 | 0.25921 |
| O196 | 0.67063 | 0.04048 | 0.21043 |
| O197 | 0.91875 | 0.04142 | 0.18173 |
| O198 | 0.56433 | 0.8773  | 0.4398  |
| O199 | 0.59037 | 0.00721 | 0.43245 |
| O200 | 0.59605 | 0.13935 | 0.45005 |
| O201 | 0.80918 | 0.87205 | 0.41129 |
| O202 | 0.82062 | 1.0028  | 0.44435 |
| O203 | 0.81668 | 0.13643 | 0.44707 |
| O204 | 0.01168 | 0.94864 | 0.219   |
| O205 | 0.01755 | 0.12843 | 0.21797 |

|      |         |         |         |
|------|---------|---------|---------|
| O206 | 0.86039 | 0.03683 | 0.78511 |
| O207 | 0.80349 | 0.06733 | 0.61383 |
| O208 | 0.70512 | 0.06495 | 0.47764 |
| O209 | 0.6067  | 0.06477 | 0.61157 |
| O210 | 0.60431 | 0.04503 | 0.80951 |
| O211 | 0.73006 | 0.02632 | 0.76729 |
| O212 | 0.85713 | 0.83115 | 0.76291 |
| O213 | 0.79652 | 0.81773 | 0.59124 |
| O214 | 0.68863 | 0.84894 | 0.48797 |
| O215 | 0.5901  | 0.81968 | 0.61545 |
| O216 | 0.60056 | 0.84251 | 0.81    |
| O217 | 0.7261  | 0.85026 | 0.75366 |
| O218 | 0.80738 | 0.93952 | 0.67214 |
| O219 | 0.58251 | 0.94411 | 0.68197 |
| O220 | 0.92897 | 0.11513 | 0.90997 |
| O221 | 0.92234 | 0.98371 | 0.94282 |
| O222 | 0.9021  | 0.8519  | 0.94599 |
| O223 | 0.69313 | 0.12366 | 0.89598 |
| O224 | 0.68613 | 0.99722 | 0.95061 |
| O225 | 0.69441 | 0.86392 | 0.94695 |
| O226 | 0.49266 | 0.04157 | 0.71108 |
| O227 | 0.48357 | 0.85876 | 0.72058 |
| O228 | 0.3639  | 0.43943 | 0.72677 |
| O229 | 0.31438 | 0.42212 | 0.90592 |
| O230 | 0.21017 | 0.44531 | 0.02775 |
| O231 | 0.10582 | 0.4235  | 0.91229 |
| O232 | 0.11222 | 0.43507 | 0.71791 |
| O233 | 0.23606 | 0.46137 | 0.76006 |
| O234 | 0.35938 | 0.6568  | 0.72757 |
| O235 | 0.30117 | 0.67055 | 0.89909 |
| O236 | 0.19213 | 0.64245 | 1.00467 |
| O237 | 0.08178 | 0.6658  | 0.90033 |
| O238 | 0.10574 | 0.64713 | 0.70596 |
| O239 | 0.2318  | 0.62432 | 0.74547 |
| O240 | 0.32409 | 0.54712 | 0.83099 |
| O241 | 0.08188 | 0.54272 | 0.82799 |
| O242 | 0.43336 | 0.36748 | 0.59841 |
| O243 | 0.42092 | 0.49848 | 0.56917 |
| O244 | 0.41129 | 0.63131 | 0.55055 |
| O245 | 0.20413 | 0.36433 | 0.62891 |
| O246 | 0.18932 | 0.49291 | 0.58043 |
| O247 | 0.19034 | 0.62585 | 0.55669 |
| O248 | 0.99608 | 0.44215 | 0.80561 |
| O249 | 0.98578 | 0.629   | 0.77417 |

|      |         |         |         |
|------|---------|---------|---------|
| O250 | 0.12869 | 0.55743 | 0.24443 |
| O251 | 0.20749 | 0.54757 | 0.40207 |
| O252 | 0.3023  | 0.55425 | 0.54355 |
| O253 | 0.39008 | 0.55508 | 0.39623 |
| O254 | 0.39099 | 0.56088 | 0.20359 |
| O255 | 0.25951 | 0.54147 | 0.22213 |
| O256 | 0.13317 | 0.31927 | 0.26774 |
| O257 | 0.19501 | 0.34958 | 0.43283 |
| O258 | 0.31298 | 0.34916 | 0.51948 |
| O259 | 0.42022 | 0.33172 | 0.40842 |
| O260 | 0.39294 | 0.32258 | 0.21443 |
| O261 | 0.26621 | 0.33737 | 0.2662  |
| O262 | 0.18412 | 0.44078 | 0.28779 |
| O263 | 0.40488 | 0.44171 | 0.29676 |
| O264 | 0.07416 | 0.61856 | 0.08666 |
| O265 | 0.09086 | 0.48631 | 0.08435 |
| O266 | 0.11784 | 0.3555  | 0.07853 |
| O267 | 0.31109 | 0.61988 | 0.08094 |
| O268 | 0.32997 | 0.48659 | 0.0744  |
| O269 | 0.30301 | 0.35519 | 0.07471 |
| O270 | 0.50206 | 0.53051 | 0.29169 |
| O271 | 0.51232 | 0.36233 | 0.27674 |
| O272 | 0.44156 | 0.74402 | 0.64138 |
| O273 | 0.19726 | 0.73967 | 0.65477 |
| O274 | 0.27273 | 0.74484 | 0.0551  |
| O275 | 0.11106 | 0.74323 | 0.05474 |
| O276 | 0.06498 | 0.24215 | 0.14156 |
| O277 | 0.30282 | 0.23538 | 0.15121 |
| O278 | 0.22853 | 0.2468  | 0.55298 |
| O279 | 0.39399 | 0.24545 | 0.55479 |
| O280 | 0.56647 | 0.25281 | 0.35947 |
| O281 | 0.80023 | 0.24095 | 0.32559 |
| O282 | 0.72662 | 0.24065 | 0.9659  |
| O283 | 0.89136 | 0.23999 | 0.94551 |
| O284 | 0.93024 | 0.73819 | 0.85677 |
| O285 | 0.68652 | 0.74679 | 0.86976 |
| O286 | 0.76659 | 0.74896 | 0.42371 |
| O287 | 0.60163 | 0.75022 | 0.44897 |
| O288 | 0.94767 | 0.26739 | 0.42682 |
| O289 | 0.92987 | 0.20467 | 0.58483 |
| O290 | 0.85912 | 0.31206 | 0.55328 |
| O291 | 0.97495 | 0.32486 | 0.59805 |
| GA29 | 0.90197 | 0.38956 | 0.63293 |
| H293 | 0.92988 | 0.30126 | 0.3737  |

|                                                                                                                                                                   |         |         |         |
|-------------------------------------------------------------------------------------------------------------------------------------------------------------------|---------|---------|---------|
| H294                                                                                                                                                              | 0.81618 | 0.33529 | 0.48067 |
| H295                                                                                                                                                              | 0.90172 | 0.17285 | 0.54731 |
| H296                                                                                                                                                              | 0.98112 | 0.46925 | 0.62369 |
| H297                                                                                                                                                              | 0.05282 | 0.51904 | 0.63704 |
| H298                                                                                                                                                              | 0.97626 | 0.60393 | 0.56993 |
| H299                                                                                                                                                              | 0.89481 | 0.47593 | 0.68578 |
| H300                                                                                                                                                              | 0.92249 | 0.58195 | 0.40555 |
| H301                                                                                                                                                              | 0.00946 | 0.38444 | 0.3911  |
| H302                                                                                                                                                              | 0.09511 | 0.47584 | 0.4718  |
| H303                                                                                                                                                              | 0.91989 | 0.46206 | 0.34301 |
| H304                                                                                                                                                              | 0.07003 | 0.40748 | 0.54733 |
| AL30                                                                                                                                                              | 0.80953 | 0.32496 | 0.30272 |
| AL30                                                                                                                                                              | 0.81059 | 0.48452 | 0.67735 |
| P307                                                                                                                                                              | 0.92923 | 0.27728 | 0.5384  |
| C308                                                                                                                                                              | 0.95059 | 0.54299 | 0.44421 |
| C309                                                                                                                                                              | 0.01836 | 0.50008 | 0.58057 |
| C310                                                                                                                                                              | 0.98102 | 0.55566 | 0.53202 |
| C311                                                                                                                                                              | 0.00261 | 0.43213 | 0.42971 |
| C312                                                                                                                                                              | 0.95476 | 0.4761  | 0.40139 |
| C313                                                                                                                                                              | 0.05155 | 0.45204 | 0.50778 |
| <b>C<sub>6</sub>H<sub>7</sub>Ga+H<sub>2</sub></b>                                                                                                                 |         |         |         |
| find above                                                                                                                                                        |         |         |         |
| <b>d) structures associated with the two H<sub>2</sub> formation steps over P/Ga/ZSM-5 in the presence of CO<sub>2</sub> (states shown in Fig. 7 and Fig. S6)</b> |         |         |         |
| <b>C<sub>6</sub>H<sub>10</sub>+Ga(H)+CO<sub>2</sub></b>                                                                                                           |         |         |         |
| SI2                                                                                                                                                               | 0.42718 | 0.05284 | 0.64293 |
| SI3                                                                                                                                                               | 0.30655 | 0.02354 | 0.78477 |
| SI4                                                                                                                                                               | 0.2824  | 0.05678 | 0.00778 |
| SI5                                                                                                                                                               | 0.1227  | 0.06001 | 0.01012 |
| SI6                                                                                                                                                               | 0.07108 | 0.02504 | 0.79698 |
| SI7                                                                                                                                                               | 0.1806  | 0.0531  | 0.64886 |
| SI8                                                                                                                                                               | 0.42303 | 0.82281 | 0.67008 |
| SI9                                                                                                                                                               | 0.30626 | 0.86538 | 0.80838 |
| SI10                                                                                                                                                              | 0.2695  | 0.82707 | 0.02884 |
| SI11                                                                                                                                                              | 0.11509 | 0.82363 | 0.01743 |
| SI12                                                                                                                                                              | 0.0667  | 0.86674 | 0.80208 |
| SI13                                                                                                                                                              | 0.18369 | 0.82332 | 0.67294 |
| SI14                                                                                                                                                              | 0.07757 | 0.94019 | 0.1499  |
| SI15                                                                                                                                                              | 0.19832 | 0.96993 | 0.29435 |
| SI16                                                                                                                                                              | 0.21959 | 0.93291 | 0.51372 |
| SI17                                                                                                                                                              | 0.37881 | 0.92927 | 0.5141  |
| SI18                                                                                                                                                              | 0.4316  | 0.96593 | 0.30461 |



|      |         |         |         |
|------|---------|---------|---------|
| SI19 | 0.32225 | 0.94287 | 0.15445 |
| SI20 | 0.08327 | 0.16919 | 0.16417 |
| SI21 | 0.19946 | 0.12642 | 0.30875 |
| SI22 | 0.2374  | 0.17089 | 0.52452 |
| SI23 | 0.39122 | 0.17058 | 0.51009 |
| SI24 | 0.43772 | 0.12363 | 0.2994  |
| SI25 | 0.32017 | 0.16215 | 0.16795 |
| SI26 | 0.57958 | 0.55673 | 0.34117 |
| SI27 | 0.68607 | 0.53131 | 0.1808  |
| SI28 | 0.71766 | 0.55302 | 0.96605 |
| SI29 | 0.87482 | 0.55837 | 0.97254 |
| SI30 | 0.93289 | 0.52423 | 0.18262 |
| SI31 | 0.80959 | 0.55563 | 0.30879 |
| SI32 | 0.58178 | 0.32676 | 0.32368 |
| SI33 | 0.69528 | 0.37308 | 0.17985 |
| SI34 | 0.73111 | 0.32329 | 0.96856 |
| SI35 | 0.88555 | 0.32111 | 0.97565 |
| SI36 | 0.9394  | 0.36551 | 0.18733 |
| SI37 | 0.92768 | 0.4356  | 0.83614 |
| SI38 | 0.77777 | 0.43621 | 0.46788 |
| SI39 | 0.62089 | 0.43272 | 0.48405 |
| SI40 | 0.56708 | 0.46808 | 0.69789 |
| SI41 | 0.6814  | 0.42861 | 0.82474 |
| SI42 | 0.91994 | 0.66992 | 0.82118 |
| SI43 | 0.80576 | 0.63525 | 0.68014 |
| SI44 | 0.76662 | 0.66508 | 0.46099 |
| SI45 | 0.61224 | 0.66907 | 0.48082 |
| SI46 | 0.56803 | 0.62483 | 0.69884 |
| SI47 | 0.68734 | 0.67377 | 0.81562 |
| SI48 | 0.57666 | 0.9391  | 0.36139 |
| SI49 | 0.69423 | 0.96389 | 0.21642 |
| SI50 | 0.72127 | 0.93375 | 0.99543 |
| SI51 | 0.88112 | 0.9291  | 0.99312 |
| SI52 | 0.93285 | 0.96759 | 0.20197 |
| SI53 | 0.8213  | 0.94188 | 0.35222 |
| SI54 | 0.57989 | 0.17112 | 0.33329 |
| SI55 | 0.69614 | 0.11882 | 0.19816 |
| SI56 | 0.73369 | 0.16341 | 0.98002 |
| SI57 | 0.88758 | 0.16755 | 0.98254 |
| SI58 | 0.93846 | 0.12498 | 0.19349 |
| SI59 | 0.81912 | 0.1623  | 0.32361 |
| SI60 | 0.92545 | 0.04885 | 0.85265 |
| SI61 | 0.80258 | 0.02076 | 0.70907 |
| SI62 | 0.78086 | 0.06107 | 0.49012 |

|      |         |         |         |
|------|---------|---------|---------|
| SI63 | 0.62142 | 0.06704 | 0.48888 |
| SI64 | 0.57238 | 0.02504 | 0.70013 |
| SI65 | 0.68022 | 0.0491  | 0.85288 |
| SI66 | 0.92201 | 0.82307 | 0.83655 |
| SI67 | 0.80294 | 0.86342 | 0.69213 |
| SI68 | 0.76914 | 0.82199 | 0.47513 |
| SI69 | 0.61524 | 0.82267 | 0.49392 |
| SI70 | 0.56726 | 0.86776 | 0.70309 |
| SI71 | 0.68264 | 0.82733 | 0.83492 |
| SI72 | 0.42538 | 0.4436  | 0.64329 |
| SI73 | 0.30906 | 0.47134 | 0.79606 |
| SI74 | 0.29241 | 0.42935 | 0.00988 |
| SI75 | 0.1337  | 0.43122 | 0.01164 |
| SI76 | 0.07961 | 0.469   | 0.80189 |
| SI77 | 0.19068 | 0.445   | 0.65688 |
| SI78 | 0.42871 | 0.66787 | 0.66207 |
| SI79 | 0.30502 | 0.62683 | 0.79765 |
| SI80 | 0.27118 | 0.67166 | 0.01143 |
| SI81 | 0.11667 | 0.67026 | 0.011   |
| SI82 | 0.06698 | 0.62646 | 0.80045 |
| SI83 | 0.18236 | 0.66522 | 0.66356 |
| SI84 | 0.08054 | 0.55215 | 0.14697 |
| SI85 | 0.20478 | 0.52562 | 0.28365 |
| SI86 | 0.23061 | 0.56366 | 0.50972 |
| SI87 | 0.38839 | 0.56629 | 0.50602 |
| SI88 | 0.432   | 0.52613 | 0.29228 |
| SI89 | 0.329   | 0.5525  | 0.13692 |
| SI90 | 0.08686 | 0.32403 | 0.16322 |
| SI91 | 0.20177 | 0.3664  | 0.30821 |
| SI92 | 0.2404  | 0.3282  | 0.52746 |
| SI93 | 0.39456 | 0.32492 | 0.51432 |
| SI94 | 0.43856 | 0.36899 | 0.29662 |
| SI95 | 0.32203 | 0.32031 | 0.17089 |
| O96  | 0.3624  | 0.05936 | 0.71509 |
| O97  | 0.305   | 0.06152 | 0.89188 |
| O98  | 0.20232 | 0.04588 | 0.01893 |
| O99  | 0.10026 | 0.06392 | 0.89428 |
| O100 | 0.10629 | 0.05452 | 0.69698 |
| O101 | 0.23322 | 0.02976 | 0.73447 |
| O102 | 0.36229 | 0.82149 | 0.75027 |
| O103 | 0.30751 | 0.84377 | 0.92483 |
| O104 | 0.19185 | 0.8508  | 0.01988 |
| O105 | 0.08702 | 0.8283  | 0.90438 |
| O106 | 0.10644 | 0.83232 | 0.70885 |

|      |         |          |         |
|------|---------|----------|---------|
| O107 | 0.23255 | 0.85072  | 0.76152 |
| O108 | 0.32501 | 0.94447  | 0.79774 |
| O109 | 0.08735 | 0.94533  | 0.80948 |
| O110 | 0.43692 | 0.12188  | 0.57935 |
| O111 | 0.41993 | 0.99057  | 0.56508 |
| O112 | 0.39917 | 0.85886  | 0.5671  |
| O113 | 0.19796 | 0.12804  | 0.60888 |
| O114 | 0.18183 | 0.99897  | 0.55758 |
| O115 | 0.19602 | 0.86462  | 0.57002 |
| O116 | 0.99141 | 0.03683  | 0.78488 |
| O117 | 0.98662 | 0.85917  | 0.78511 |
| O118 | 0.14278 | 0.9374   | 0.22119 |
| O119 | 0.20078 | 0.92559  | 0.39624 |
| O120 | 0.29954 | 0.94316  | 0.52871 |
| O121 | 0.39784 | 0.92444  | 0.39655 |
| O122 | 0.3972  | 0.94378  | 0.20006 |
| O123 | 0.27088 | 0.96843  | 0.24048 |
| O124 | 0.14436 | 0.16565  | 0.24292 |
| O125 | 0.20097 | 0.16202  | 0.41729 |
| O126 | 0.31422 | 0.14422  | 0.51695 |
| O127 | 0.41533 | 0.16938  | 0.39433 |
| O128 | 0.39734 | 0.14792  | 0.20013 |
| O129 | 0.27245 | 0.13233  | 0.25603 |
| O130 | 0.17936 | 0.04756  | 0.31973 |
| O131 | 0.42072 | 0.04575  | 0.32508 |
| O132 | 0.06983 | 0.86867  | 0.0923  |
| O133 | 0.08319 | -0.00038 | 0.06676 |
| O134 | 0.10358 | 0.13125  | 0.06122 |
| O135 | 0.30484 | 0.86664  | 0.12039 |
| O136 | 0.3196  | 0.99257  | 0.05821 |
| O137 | 0.30436 | 0.12625  | 0.06185 |
| O138 | 0.51038 | 0.94868  | 0.29368 |
| O139 | 0.51726 | 0.13327  | 0.27916 |
| O140 | 0.63733 | 0.56997  | 0.25868 |
| O141 | 0.67481 | 0.5607   | 0.06895 |
| O142 | 0.79642 | 0.54558  | 0.99287 |
| O143 | 0.91456 | 0.56141  | 0.07807 |
| O144 | 0.8873  | 0.55369  | 0.2737  |
| O145 | 0.76316 | 0.54795  | 0.21103 |
| O146 | 0.64374 | 0.32831  | 0.24661 |
| O147 | 0.68888 | 0.34772  | 0.06501 |
| O148 | 0.8088  | 0.34852  | 0.97639 |
| O149 | 0.91811 | 0.3259   | 0.08615 |
| O150 | 0.9035  | 0.33243  | 0.2844  |

|      |         |         |         |
|------|---------|---------|---------|
| O151 | 0.77035 | 0.36424 | 0.21944 |
| O152 | 0.67112 | 0.45138 | 0.18704 |
| O153 | 0.91899 | 0.44428 | 0.17333 |
| O154 | 0.56727 | 0.62587 | 0.403   |
| O155 | 0.60004 | 0.49761 | 0.4186  |
| O156 | 0.60147 | 0.36339 | 0.42828 |
| O157 | 0.79813 | 0.62639 | 0.36548 |
| O158 | 0.79078 | 0.49417 | 0.38544 |
| O159 | 0.80289 | 0.3629  | 0.4263  |
| O160 | 0.0112  | 0.53961 | 0.20812 |
| O161 | 0.0202  | 0.36223 | 0.20289 |
| O162 | 0.87781 | 0.43023 | 0.73766 |
| O163 | 0.82328 | 0.44763 | 0.56969 |
| O164 | 0.70113 | 0.43557 | 0.50161 |
| O165 | 0.58432 | 0.43329 | 0.59122 |
| O166 | 0.60345 | 0.42998 | 0.78952 |
| O167 | 0.72932 | 0.44169 | 0.73094 |
| O168 | 0.86752 | 0.67719 | 0.72934 |
| O169 | 0.80993 | 0.6452  | 0.55922 |
| O170 | 0.68922 | 0.64205 | 0.47706 |
| O171 | 0.58305 | 0.66047 | 0.59248 |
| O172 | 0.6095  | 0.6626  | 0.78609 |
| O173 | 0.73419 | 0.66656 | 0.71649 |
| O174 | 0.81322 | 0.55801 | 0.71146 |
| O175 | 0.59017 | 0.54648 | 0.69421 |
| O176 | 0.92896 | 0.36567 | 0.89718 |
| O177 | 0.90283 | 0.4961  | 0.90655 |
| O178 | 0.88736 | 0.62861 | 0.91403 |
| O179 | 0.69612 | 0.35443 | 0.87022 |
| O180 | 0.69209 | 0.4858  | 0.91054 |
| O181 | 0.70867 | 0.62021 | 0.90003 |
| O182 | 0.48704 | 0.46239 | 0.71648 |
| O183 | 0.48895 | 0.6326  | 0.725   |
| O184 | 0.64045 | 0.92708 | 0.28858 |
| O185 | 0.69822 | 0.92454 | 0.11065 |
| O186 | 0.80155 | 0.94359 | 0.98469 |
| O187 | 0.90288 | 0.92394 | 0.10957 |
| O188 | 0.89584 | 0.94712 | 0.30552 |
| O189 | 0.76795 | 0.96195 | 0.26626 |
| O190 | 0.64524 | 0.16472 | 0.26256 |
| O191 | 0.69677 | 0.14661 | 0.0848  |
| O192 | 0.81128 | 0.13874 | 0.98611 |
| O193 | 0.91797 | 0.1679  | 0.09499 |
| O194 | 0.89649 | 0.1514  | 0.28944 |

|      |         |         |         |
|------|---------|---------|---------|
| O195 | 0.77079 | 0.12158 | 0.24652 |
| O196 | 0.67082 | 0.04126 | 0.19953 |
| O197 | 0.92145 | 0.04626 | 0.17467 |
| O198 | 0.56715 | 0.87298 | 0.43132 |
| O199 | 0.58533 | 0.00445 | 0.43303 |
| O200 | 0.59436 | 0.13742 | 0.44238 |
| O201 | 0.80881 | 0.86608 | 0.39236 |
| O202 | 0.81492 | 0.99368 | 0.44567 |
| O203 | 0.81287 | 0.12806 | 0.43654 |
| O204 | 0.01178 | 0.95211 | 0.21826 |
| O205 | 0.01772 | 0.13496 | 0.21523 |
| O206 | 0.86076 | 0.05015 | 0.7802  |
| O207 | 0.79796 | 0.06619 | 0.60813 |
| O208 | 0.70126 | 0.06026 | 0.46942 |
| O209 | 0.60536 | 0.06667 | 0.60756 |
| O210 | 0.60568 | 0.04769 | 0.8054  |
| O211 | 0.7316  | 0.02368 | 0.76691 |
| O212 | 0.85997 | 0.82893 | 0.75996 |
| O213 | 0.80519 | 0.82756 | 0.58343 |
| O214 | 0.69232 | 0.84878 | 0.48498 |
| O215 | 0.59189 | 0.82134 | 0.61004 |
| O216 | 0.60526 | 0.84192 | 0.80351 |
| O217 | 0.72997 | 0.85269 | 0.74314 |
| O218 | 0.81798 | 0.9432  | 0.67916 |
| O219 | 0.58591 | 0.94559 | 0.67942 |
| O220 | 0.93238 | 0.12031 | 0.91016 |
| O221 | 0.92039 | 0.98951 | 0.93627 |
| O222 | 0.90165 | 0.85805 | 0.94193 |
| O223 | 0.69674 | 0.12513 | 0.88835 |
| O224 | 0.68411 | 0.99945 | 0.94926 |
| O225 | 0.69935 | 0.86634 | 0.93744 |
| O226 | 0.49323 | 0.04086 | 0.71053 |
| O227 | 0.48696 | 0.86129 | 0.71895 |
| O228 | 0.35782 | 0.44369 | 0.70937 |
| O229 | 0.31488 | 0.42313 | 0.89353 |
| O230 | 0.21315 | 0.44629 | 0.02071 |
| O231 | 0.11244 | 0.42842 | 0.89474 |
| O232 | 0.11311 | 0.44851 | 0.69465 |
| O233 | 0.23317 | 0.46741 | 0.75422 |
| O234 | 0.3598  | 0.65933 | 0.72367 |
| O235 | 0.30259 | 0.67095 | 0.89943 |
| O236 | 0.19416 | 0.64472 | 0.00903 |
| O237 | 0.0873  | 0.67042 | 0.8979  |
| O238 | 0.10563 | 0.65461 | 0.70164 |

|      |         |         |         |
|------|---------|---------|---------|
| O239 | 0.23186 | 0.62964 | 0.74454 |
| O240 | 0.32472 | 0.54942 | 0.82439 |
| O241 | 0.08834 | 0.54904 | 0.82129 |
| O242 | 0.43652 | 0.36983 | 0.59399 |
| O243 | 0.42063 | 0.49824 | 0.55288 |
| O244 | 0.42359 | 0.63257 | 0.55269 |
| O245 | 0.20812 | 0.3694  | 0.62065 |
| O246 | 0.20478 | 0.49466 | 0.56287 |
| O247 | 0.19184 | 0.62881 | 0.55541 |
| O248 | 0.00112 | 0.45132 | 0.79284 |
| O249 | 0.98703 | 0.63174 | 0.78094 |
| O250 | 0.1414  | 0.55999 | 0.22689 |
| O251 | 0.2177  | 0.56188 | 0.39043 |
| O252 | 0.30961 | 0.57008 | 0.53301 |
| O253 | 0.4002  | 0.56615 | 0.38677 |
| O254 | 0.4007  | 0.55853 | 0.19179 |
| O255 | 0.27138 | 0.53463 | 0.21759 |
| O256 | 0.14243 | 0.32644 | 0.25151 |
| O257 | 0.20076 | 0.34424 | 0.42447 |
| O258 | 0.31765 | 0.35163 | 0.51279 |
| O259 | 0.425   | 0.33222 | 0.40289 |
| O260 | 0.39882 | 0.33039 | 0.20743 |
| O261 | 0.27378 | 0.34939 | 0.25876 |
| O262 | 0.18804 | 0.44661 | 0.29943 |
| O263 | 0.41344 | 0.44669 | 0.30174 |
| O264 | 0.07341 | 0.62118 | 0.08292 |
| O265 | 0.0931  | 0.49036 | 0.06955 |
| O266 | 0.11587 | 0.35942 | 0.06248 |
| O267 | 0.31452 | 0.62378 | 0.08374 |
| O268 | 0.33405 | 0.49171 | 0.05669 |
| O269 | 0.30943 | 0.35929 | 0.06599 |
| O270 | 0.5118  | 0.53562 | 0.28427 |
| O271 | 0.51804 | 0.36485 | 0.27291 |
| O272 | 0.44413 | 0.74652 | 0.64317 |
| O273 | 0.19892 | 0.74448 | 0.65117 |
| O274 | 0.27435 | 0.7476  | 0.05439 |
| O275 | 0.11166 | 0.74609 | 0.05475 |
| O276 | 0.06865 | 0.24697 | 0.13638 |
| O277 | 0.30648 | 0.24161 | 0.15268 |
| O278 | 0.23746 | 0.24931 | 0.55663 |
| O279 | 0.39831 | 0.24718 | 0.55027 |
| O280 | 0.56242 | 0.24966 | 0.35023 |
| O281 | 0.80022 | 0.23974 | 0.33255 |
| O282 | 0.72921 | 0.24261 | 0.95782 |

|                          |          |         |         |
|--------------------------|----------|---------|---------|
| O283                     | 0.8885   | 0.24352 | 0.93901 |
| O284                     | 0.93892  | 0.74485 | 0.85996 |
| O285                     | 0.69541  | 0.74885 | 0.86028 |
| O286                     | 0.77107  | 0.74472 | 0.43763 |
| O287                     | 0.60865  | 0.74748 | 0.44834 |
| O288                     | 0.95616  | 0.25027 | 0.45137 |
| O289                     | 0.87911  | 0.19356 | 0.57761 |
| O290                     | 0.87552  | 0.32124 | 0.55467 |
| O291                     | -0.02881 | 0.26689 | 0.6439  |
| O292                     | 0.0963   | 0.28199 | 0.56052 |
| O293                     | 0.10172  | 0.27409 | 0.73568 |
| GA29                     | 0.9159   | 0.40582 | 0.6003  |
| H295                     | 0.9404   | 0.27929 | 0.39603 |
| H296                     | 0.83796  | 0.33439 | 0.49226 |
| H297                     | 0.85657  | 0.17175 | 0.5195  |
| H298                     | 0.97394  | 0.53178 | 0.60449 |
| H299                     | 0.99114  | 0.40269 | 0.62519 |
| H300                     | 0.10911  | 0.53653 | 0.51685 |
| H301                     | 0.09539  | 0.54098 | 0.38654 |
| H302                     | -0.00216 | 0.60086 | 0.40373 |
| H303                     | 0.03532  | 0.62365 | 0.51907 |
| H304                     | 0.91559  | 0.58322 | 0.5406  |
| H305                     | 0.96654  | 0.40631 | 0.37732 |
| H306                     | 0.08561  | 0.42396 | 0.41262 |
| H307                     | 0.88658  | 0.48936 | 0.43465 |
| H308                     | 0.05705  | 0.4344  | 0.53573 |
| AL30                     | 0.81728  | 0.32287 | 0.30715 |
| AL31                     | 0.80398  | 0.47361 | 0.69498 |
| P311                     | 0.92504  | 0.25578 | 0.56014 |
| C312                     | 0.95703  | 0.54801 | 0.52938 |
| C313                     | 0.07201  | 0.52983 | 0.4583  |
| C314                     | 0.01614  | 0.58099 | 0.47542 |
| C315                     | 0.98186  | 0.44603 | 0.42858 |
| C316                     | 0.9362   | 0.48965 | 0.46557 |
| C317                     | 0.052    | 0.45445 | 0.45859 |
| C318                     | 0.09716  | 0.27764 | 0.64834 |
| <b>TS<sub>COOH</sub></b> |          |         |         |
| SI2                      | 0.42669  | 0.0529  | 0.64292 |
| SI3                      | 0.30656  | 0.02299 | 0.78508 |
| SI4                      | 0.28206  | 0.05646 | 0.0078  |
| SI5                      | 0.12203  | 0.05992 | 0.0097  |
| SI6                      | 0.0709   | 0.02567 | 0.79609 |
| SI7                      | 0.18109  | 0.05123 | 0.64885 |

|      |         |         |         |
|------|---------|---------|---------|
| SI8  | 0.423   | 0.82262 | 0.66939 |
| SI9  | 0.30672 | 0.86523 | 0.80858 |
| SI10 | 0.26984 | 0.82664 | 0.02849 |
| SI11 | 0.11546 | 0.82345 | 0.0177  |
| SI12 | 0.06655 | 0.86728 | 0.80236 |
| SI13 | 0.18389 | 0.82233 | 0.67465 |
| SI14 | 0.07797 | 0.94012 | 0.15    |
| SI15 | 0.19877 | 0.96971 | 0.29577 |
| SI16 | 0.21935 | 0.93077 | 0.51426 |
| SI17 | 0.37857 | 0.92933 | 0.51364 |
| SI18 | 0.43178 | 0.96531 | 0.30348 |
| SI19 | 0.32174 | 0.94225 | 0.15457 |
| SI20 | 0.08286 | 0.1688  | 0.16467 |
| SI21 | 0.20008 | 0.12638 | 0.30919 |
| SI22 | 0.23851 | 0.17005 | 0.52357 |
| SI23 | 0.39236 | 0.17038 | 0.50835 |
| SI24 | 0.43958 | 0.12328 | 0.29812 |
| SI25 | 0.32091 | 0.16185 | 0.16796 |
| SI26 | 0.58196 | 0.55517 | 0.34215 |
| SI27 | 0.68943 | 0.53131 | 0.18326 |
| SI28 | 0.71975 | 0.55397 | 0.9662  |
| SI29 | 0.87764 | 0.55983 | 0.9787  |
| SI30 | 0.93165 | 0.52466 | 0.18894 |
| SI31 | 0.8109  | 0.55234 | 0.31919 |
| SI32 | 0.58171 | 0.32683 | 0.32689 |
| SI33 | 0.69639 | 0.3737  | 0.18285 |
| SI34 | 0.7318  | 0.32342 | 0.97125 |
| SI35 | 0.88626 | 0.32173 | 0.98047 |
| SI36 | 0.93984 | 0.36623 | 0.19032 |
| SI37 | 0.92957 | 0.43841 | 0.84676 |
| SI38 | 0.77934 | 0.43252 | 0.47773 |
| SI39 | 0.62176 | 0.43127 | 0.48689 |
| SI40 | 0.56656 | 0.46824 | 0.70093 |
| SI41 | 0.67951 | 0.43055 | 0.82929 |
| SI42 | 0.91974 | 0.67101 | 0.82494 |
| SI43 | 0.80502 | 0.63649 | 0.68271 |
| SI44 | 0.76732 | 0.66521 | 0.46352 |
| SI45 | 0.61295 | 0.66761 | 0.48406 |
| SI46 | 0.56798 | 0.62533 | 0.70309 |
| SI47 | 0.68765 | 0.67509 | 0.81768 |
| SI48 | 0.57573 | 0.93794 | 0.3608  |
| SI49 | 0.69394 | 0.96518 | 0.21652 |
| SI50 | 0.72071 | 0.93571 | 0.99551 |
| SI51 | 0.88051 | 0.93072 | 0.99201 |



|      |         |         |         |
|------|---------|---------|---------|
| SI52 | 0.93327 | 0.9672  | 0.20128 |
| SI53 | 0.82129 | 0.94136 | 0.35064 |
| SI54 | 0.58135 | 0.17119 | 0.33057 |
| SI55 | 0.69561 | 0.11997 | 0.1932  |
| SI56 | 0.73399 | 0.16377 | 0.97612 |
| SI57 | 0.88785 | 0.16815 | 0.98269 |
| SI58 | 0.93812 | 0.12477 | 0.19454 |
| SI59 | 0.81742 | 0.16271 | 0.32018 |
| SI60 | 0.92497 | 0.05029 | 0.85062 |
| SI61 | 0.80269 | 0.02088 | 0.70711 |
| SI62 | 0.77871 | 0.05874 | 0.48775 |
| SI63 | 0.62    | 0.06499 | 0.4868  |
| SI64 | 0.57178 | 0.02531 | 0.69869 |
| SI65 | 0.68067 | 0.04946 | 0.8506  |
| SI66 | 0.92172 | 0.82389 | 0.83581 |
| SI67 | 0.80357 | 0.86378 | 0.69066 |
| SI68 | 0.76873 | 0.82176 | 0.47378 |
| SI69 | 0.61505 | 0.82152 | 0.49365 |
| SI70 | 0.56714 | 0.868   | 0.7024  |
| SI71 | 0.68318 | 0.82872 | 0.8344  |
| SI72 | 0.42611 | 0.44218 | 0.64357 |
| SI73 | 0.31015 | 0.46942 | 0.79582 |
| SI74 | 0.29176 | 0.42996 | 0.01066 |
| SI75 | 0.13331 | 0.43131 | 0.01236 |
| SI76 | 0.07833 | 0.46945 | 0.80382 |
| SI77 | 0.19011 | 0.44496 | 0.657   |
| SI78 | 0.42861 | 0.66769 | 0.6629  |
| SI79 | 0.30604 | 0.62528 | 0.79882 |
| SI80 | 0.27197 | 0.67087 | 0.01227 |
| SI81 | 0.11736 | 0.66997 | 0.0116  |
| SI82 | 0.06602 | 0.62639 | 0.80262 |
| SI83 | 0.18314 | 0.66356 | 0.66695 |
| SI84 | 0.08021 | 0.55145 | 0.14857 |
| SI85 | 0.20528 | 0.52428 | 0.28522 |
| SI86 | 0.23141 | 0.56274 | 0.51063 |
| SI87 | 0.38955 | 0.56492 | 0.50659 |
| SI88 | 0.43365 | 0.52586 | 0.29287 |
| SI89 | 0.3295  | 0.55225 | 0.13874 |
| SI90 | 0.08737 | 0.32384 | 0.16398 |
| SI91 | 0.20232 | 0.36444 | 0.31047 |
| SI92 | 0.23979 | 0.32719 | 0.53003 |
| SI93 | 0.3939  | 0.32472 | 0.51444 |
| SI94 | 0.43837 | 0.36868 | 0.29636 |
| SI95 | 0.32189 | 0.3198  | 0.17169 |

|      |         |         |         |
|------|---------|---------|---------|
| O96  | 0.36168 | 0.0595  | 0.71474 |
| O97  | 0.30491 | 0.06128 | 0.89199 |
| O98  | 0.20179 | 0.04701 | 0.01861 |
| O99  | 0.09975 | 0.06453 | 0.89379 |
| O100 | 0.10674 | 0.05569 | 0.69679 |
| O101 | 0.23285 | 0.02781 | 0.7356  |
| O102 | 0.36215 | 0.82127 | 0.74944 |
| O103 | 0.30842 | 0.84358 | 0.92502 |
| O104 | 0.19228 | 0.8505  | 0.01865 |
| O105 | 0.08643 | 0.82939 | 0.90533 |
| O106 | 0.1066  | 0.83244 | 0.70977 |
| O107 | 0.23271 | 0.85095 | 0.76249 |
| O108 | 0.32602 | 0.94422 | 0.79819 |
| O109 | 0.08711 | 0.94601 | 0.80849 |
| O110 | 0.43686 | 0.12198 | 0.57964 |
| O111 | 0.41925 | 0.99089 | 0.56472 |
| O112 | 0.39953 | 0.85908 | 0.56648 |
| O113 | 0.20157 | 0.12482 | 0.60734 |
| O114 | 0.18045 | 0.99577 | 0.55954 |
| O115 | 0.19696 | 0.86191 | 0.57021 |
| O116 | 0.99131 | 0.03808 | 0.78359 |
| O117 | 0.98653 | 0.86006 | 0.78503 |
| O118 | 0.14309 | 0.93891 | 0.2214  |
| O119 | 0.20032 | 0.92426 | 0.39668 |
| O120 | 0.29916 | 0.94262 | 0.52866 |
| O121 | 0.39733 | 0.92489 | 0.39595 |
| O122 | 0.39692 | 0.94378 | 0.19903 |
| O123 | 0.27122 | 0.9678  | 0.24171 |
| O124 | 0.1446  | 0.16409 | 0.24213 |
| O125 | 0.20052 | 0.16336 | 0.41698 |
| O126 | 0.31522 | 0.14424 | 0.51166 |
| O127 | 0.41864 | 0.16906 | 0.39379 |
| O128 | 0.3981  | 0.14778 | 0.20002 |
| O129 | 0.27307 | 0.13283 | 0.2566  |
| O130 | 0.18126 | 0.04744 | 0.32307 |
| O131 | 0.42283 | 0.04539 | 0.32373 |
| O132 | 0.07086 | 0.86806 | 0.09401 |
| O133 | 0.08317 | 0.99876 | 0.06543 |
| O134 | 0.10177 | 0.13074 | 0.06124 |
| O135 | 0.30447 | 0.86594 | 0.12094 |
| O136 | 0.31803 | 0.99154 | 0.05796 |
| O137 | 0.30495 | 0.12539 | 0.06239 |
| O138 | 0.50997 | 0.94587 | 0.29148 |
| O139 | 0.51891 | 0.13302 | 0.27633 |

|      |         |         |         |
|------|---------|---------|---------|
| O140 | 0.63901 | 0.56993 | 0.25906 |
| O141 | 0.68295 | 0.565   | 0.07336 |
| O142 | 0.79929 | 0.54003 | 0.98135 |
| O143 | 0.90704 | 0.5666  | 0.09124 |
| O144 | 0.88905 | 0.54897 | 0.28603 |
| O145 | 0.7661  | 0.54295 | 0.21973 |
| O146 | 0.64517 | 0.33087 | 0.25299 |
| O147 | 0.69045 | 0.34323 | 0.07069 |
| O148 | 0.80951 | 0.34892 | 0.97866 |
| O149 | 0.91637 | 0.32387 | 0.09271 |
| O150 | 0.90468 | 0.33436 | 0.28913 |
| O151 | 0.7715  | 0.36702 | 0.22329 |
| O152 | 0.67137 | 0.45185 | 0.18202 |
| O153 | 0.91987 | 0.44467 | 0.17219 |
| O154 | 0.56887 | 0.62313 | 0.40661 |
| O155 | 0.60465 | 0.49521 | 0.41662 |
| O156 | 0.59803 | 0.36219 | 0.43358 |
| O157 | 0.7989  | 0.6253  | 0.3694  |
| O158 | 0.79106 | 0.49393 | 0.39946 |
| O159 | 0.80494 | 0.36143 | 0.43078 |
| O160 | 0.01059 | 0.54047 | 0.20898 |
| O161 | 0.02085 | 0.36226 | 0.20335 |
| O162 | 0.87394 | 0.43496 | 0.75831 |
| O163 | 0.82331 | 0.44215 | 0.58037 |
| O164 | 0.70143 | 0.42965 | 0.50692 |
| O165 | 0.58346 | 0.43618 | 0.59249 |
| O166 | 0.60197 | 0.42846 | 0.79172 |
| O167 | 0.72743 | 0.44517 | 0.73657 |
| O168 | 0.86578 | 0.67797 | 0.73551 |
| O169 | 0.81105 | 0.64843 | 0.56242 |
| O170 | 0.69019 | 0.6417  | 0.48094 |
| O171 | 0.58356 | 0.65955 | 0.59576 |
| O172 | 0.60946 | 0.66353 | 0.79004 |
| O173 | 0.73304 | 0.66813 | 0.71713 |
| O174 | 0.81173 | 0.55919 | 0.71194 |
| O175 | 0.58914 | 0.54677 | 0.70119 |
| O176 | 0.9322  | 0.36778 | 0.90729 |
| O177 | 0.91883 | 0.50025 | 0.92301 |
| O178 | 0.88963 | 0.63031 | 0.92027 |
| O179 | 0.69554 | 0.35712 | 0.87627 |
| O180 | 0.6863  | 0.48864 | 0.91502 |
| O181 | 0.7111  | 0.62212 | 0.90186 |
| O182 | 0.48643 | 0.46159 | 0.71844 |
| O183 | 0.48875 | 0.63415 | 0.72795 |

|      |         |         |         |
|------|---------|---------|---------|
| O184 | 0.64082 | 0.92851 | 0.28985 |
| O185 | 0.69699 | 0.92607 | 0.11043 |
| O186 | 0.80102 | 0.94599 | 0.98665 |
| O187 | 0.90404 | 0.9245  | 0.10754 |
| O188 | 0.89581 | 0.94551 | 0.30377 |
| O189 | 0.76804 | 0.96333 | 0.26538 |
| O190 | 0.64605 | 0.1671  | 0.25804 |
| O191 | 0.69476 | 0.1454  | 0.07864 |
| O192 | 0.81157 | 0.13936 | 0.98535 |
| O193 | 0.91804 | 0.16703 | 0.09526 |
| O194 | 0.89569 | 0.15058 | 0.2907  |
| O195 | 0.77106 | 0.12412 | 0.23855 |
| O196 | 0.67039 | 0.04254 | 0.19985 |
| O197 | 0.92177 | 0.04604 | 0.17551 |
| O198 | 0.56712 | 0.87133 | 0.42979 |
| O199 | 0.58066 | 0.00361 | 0.43294 |
| O200 | 0.59737 | 0.13619 | 0.43822 |
| O201 | 0.80753 | 0.86566 | 0.38978 |
| O202 | 0.8165  | 0.99297 | 0.44472 |
| O203 | 0.80695 | 0.12673 | 0.43172 |
| O204 | 0.0122  | 0.95215 | 0.21826 |
| O205 | 0.01725 | 0.13563 | 0.21704 |
| O206 | 0.86068 | 0.05226 | 0.77707 |
| O207 | 0.79611 | 0.06594 | 0.60565 |
| O208 | 0.69936 | 0.05287 | 0.46781 |
| O209 | 0.60373 | 0.06713 | 0.60542 |
| O210 | 0.60612 | 0.0481  | 0.80315 |
| O211 | 0.73196 | 0.02184 | 0.76589 |
| O212 | 0.86055 | 0.8284  | 0.75752 |
| O213 | 0.80528 | 0.82859 | 0.58153 |
| O214 | 0.69187 | 0.8482  | 0.48438 |
| O215 | 0.59165 | 0.82132 | 0.60972 |
| O216 | 0.60578 | 0.84312 | 0.80273 |
| O217 | 0.73068 | 0.85354 | 0.74235 |
| O218 | 0.81983 | 0.94351 | 0.6784  |
| O219 | 0.58499 | 0.9459  | 0.67752 |
| O220 | 0.93227 | 0.1218  | 0.90826 |
| O221 | 0.91925 | 0.99117 | 0.93439 |
| O222 | 0.89984 | 0.8599  | 0.93965 |
| O223 | 0.69872 | 0.1259  | 0.88254 |
| O224 | 0.68384 | 0.00159 | 0.9491  |
| O225 | 0.69957 | 0.8686  | 0.93633 |
| O226 | 0.49262 | 0.04085 | 0.71079 |
| O227 | 0.48693 | 0.86077 | 0.71887 |

|      |         |         |         |
|------|---------|---------|---------|
| O228 | 0.35837 | 0.44069 | 0.70936 |
| O229 | 0.31508 | 0.42231 | 0.89476 |
| O230 | 0.21257 | 0.448   | 0.01933 |
| O231 | 0.11112 | 0.4274  | 0.89563 |
| O232 | 0.11371 | 0.45323 | 0.6968  |
| O233 | 0.2345  | 0.46507 | 0.75334 |
| O234 | 0.35921 | 0.6591  | 0.72348 |
| O235 | 0.30515 | 0.66844 | 0.90152 |
| O236 | 0.19483 | 0.64439 | 0.0081  |
| O237 | 0.08719 | 0.67114 | 0.89892 |
| O238 | 0.10619 | 0.65135 | 0.70314 |
| O239 | 0.23187 | 0.62804 | 0.74896 |
| O240 | 0.32634 | 0.5476  | 0.82268 |
| O241 | 0.08466 | 0.54889 | 0.82838 |
| O242 | 0.43751 | 0.36877 | 0.593   |
| O243 | 0.4217  | 0.49678 | 0.55316 |
| O244 | 0.42418 | 0.63105 | 0.55449 |
| O245 | 0.20321 | 0.36786 | 0.62068 |
| O246 | 0.20444 | 0.49361 | 0.56208 |
| O247 | 0.19538 | 0.62875 | 0.55837 |
| O248 | 0.00079 | 0.44793 | 0.78949 |
| O249 | 0.98644 | 0.6334  | 0.78177 |
| O250 | 0.14093 | 0.55707 | 0.22924 |
| O251 | 0.21735 | 0.56145 | 0.39157 |
| O252 | 0.31065 | 0.5672  | 0.53271 |
| O253 | 0.40196 | 0.56584 | 0.38749 |
| O254 | 0.40163 | 0.55805 | 0.19256 |
| O255 | 0.27191 | 0.53375 | 0.21928 |
| O256 | 0.14267 | 0.32572 | 0.25272 |
| O257 | 0.19944 | 0.34148 | 0.42673 |
| O258 | 0.31674 | 0.35176 | 0.51725 |
| O259 | 0.42203 | 0.33186 | 0.40177 |
| O260 | 0.39896 | 0.33103 | 0.20584 |
| O261 | 0.27445 | 0.34574 | 0.26285 |
| O262 | 0.19071 | 0.4449  | 0.30209 |
| O263 | 0.41427 | 0.44661 | 0.3019  |
| O264 | 0.07498 | 0.62067 | 0.08435 |
| O265 | 0.09204 | 0.48953 | 0.07088 |
| O266 | 0.11735 | 0.35906 | 0.0636  |
| O267 | 0.31424 | 0.62395 | 0.08737 |
| O268 | 0.33389 | 0.49211 | 0.05715 |
| O269 | 0.3066  | 0.36012 | 0.06875 |
| O270 | 0.51358 | 0.53469 | 0.28561 |
| O271 | 0.51789 | 0.36366 | 0.27418 |

|      |         |         |         |
|------|---------|---------|---------|
| O272 | 0.44337 | 0.74625 | 0.64188 |
| O273 | 0.19866 | 0.74311 | 0.65632 |
| O274 | 0.27468 | 0.7472  | 0.05358 |
| O275 | 0.11247 | 0.74591 | 0.05509 |
| O276 | 0.06922 | 0.24678 | 0.13684 |
| O277 | 0.30753 | 0.24117 | 0.1509  |
| O278 | 0.23732 | 0.24813 | 0.55892 |
| O279 | 0.39786 | 0.24684 | 0.54938 |
| O280 | 0.56301 | 0.24909 | 0.35046 |
| O281 | 0.80118 | 0.2405  | 0.3311  |
| O282 | 0.73036 | 0.24304 | 0.95473 |
| O283 | 0.88992 | 0.24463 | 0.94081 |
| O284 | 0.93924 | 0.74628 | 0.86191 |
| O285 | 0.69572 | 0.7505  | 0.86148 |
| O286 | 0.77074 | 0.74452 | 0.43679 |
| O287 | 0.6084  | 0.74581 | 0.45014 |
| O288 | 0.96008 | 0.26463 | 0.44475 |
| O289 | 0.90216 | 0.17103 | 0.5466  |
| O290 | 0.86019 | 0.29331 | 0.55892 |
| O291 | 0.96832 | 0.25624 | 0.63303 |
| O292 | 0.09868 | 0.22697 | 0.59817 |
| O293 | 0.05888 | 0.32847 | 0.66711 |
| GA29 | 0.9206  | 0.39783 | 0.6177  |
| H295 | 0.93842 | 0.28761 | 0.386   |
| H296 | 0.83422 | 0.31936 | 0.49968 |
| H297 | 0.86444 | 0.15613 | 0.50241 |
| H298 | 0.96764 | 0.53411 | 0.61128 |
| H299 | 0.99646 | 0.3325  | 0.65231 |
| H300 | 0.10097 | 0.55446 | 0.54078 |
| H301 | 0.09847 | 0.56425 | 0.40985 |
| H302 | 0.98906 | 0.60419 | 0.41068 |
| H303 | 0.01845 | 0.63379 | 0.52777 |
| H304 | 0.90558 | 0.57688 | 0.54243 |
| H305 | 0.98275 | 0.40809 | 0.38442 |
| H306 | 0.097   | 0.44645 | 0.41255 |
| H307 | 0.89092 | 0.47614 | 0.44271 |
| H308 | 0.07032 | 0.44489 | 0.53712 |
| AL30 | 0.81777 | 0.32478 | 0.31103 |
| AL31 | 0.80381 | 0.47403 | 0.70146 |
| P311 | 0.92243 | 0.24629 | 0.54459 |
| C312 | 0.95149 | 0.54739 | 0.53448 |
| C313 | 0.07045 | 0.54574 | 0.47437 |
| C314 | 0.00714 | 0.58814 | 0.48456 |
| C315 | 0.99176 | 0.45035 | 0.43452 |

|                                         |         |         |         |
|-----------------------------------------|---------|---------|---------|
| C316                                    | 0.9403  | 0.48613 | 0.47105 |
| C317                                    | 0.06059 | 0.46857 | 0.46394 |
| C318                                    | 0.07184 | 0.27363 | 0.63148 |
| <b>C<sub>6</sub>H<sub>10</sub>+COOH</b> |         |         |         |
| SI2                                     | 0.42629 | 0.0528  | 0.64309 |
| SI3                                     | 0.30592 | 0.02311 | 0.78524 |
| SI4                                     | 0.28183 | 0.05669 | 0.00829 |
| SI5                                     | 0.12202 | 0.06042 | 0.01078 |
| SI6                                     | 0.07088 | 0.02407 | 0.79792 |
| SI7                                     | 0.17985 | 0.05137 | 0.6488  |
| SI8                                     | 0.42278 | 0.82279 | 0.67059 |
| SI9                                     | 0.30599 | 0.86511 | 0.80904 |
| SI10                                    | 0.26947 | 0.82655 | 0.02958 |
| SI11                                    | 0.11508 | 0.82329 | 0.01786 |
| SI12                                    | 0.06698 | 0.86603 | 0.80265 |
| SI13                                    | 0.18377 | 0.82232 | 0.67362 |
| SI14                                    | 0.07719 | 0.94009 | 0.15018 |
| SI15                                    | 0.19791 | 0.96911 | 0.29464 |
| SI16                                    | 0.2193  | 0.93114 | 0.51385 |
| SI17                                    | 0.37851 | 0.92896 | 0.51424 |
| SI18                                    | 0.43133 | 0.96579 | 0.3049  |
| SI19                                    | 0.322   | 0.94253 | 0.15494 |
| SI20                                    | 0.08296 | 0.16961 | 0.1639  |
| SI21                                    | 0.19907 | 0.12559 | 0.30831 |
| SI22                                    | 0.23555 | 0.17024 | 0.5242  |
| SI23                                    | 0.38977 | 0.17033 | 0.50967 |
| SI24                                    | 0.43705 | 0.12324 | 0.29943 |
| SI25                                    | 0.31968 | 0.16176 | 0.16843 |
| SI26                                    | 0.58101 | 0.55548 | 0.34338 |
| SI27                                    | 0.68795 | 0.53169 | 0.18258 |
| SI28                                    | 0.72006 | 0.55336 | 0.96679 |
| SI29                                    | 0.87763 | 0.55989 | 0.98013 |
| SI30                                    | 0.93174 | 0.52572 | 0.18946 |
| SI31                                    | 0.8094  | 0.55219 | 0.31667 |
| SI32                                    | 0.57902 | 0.32666 | 0.32446 |
| SI33                                    | 0.69573 | 0.37383 | 0.1843  |
| SI34                                    | 0.73205 | 0.32386 | 0.97079 |
| SI35                                    | 0.88654 | 0.32206 | 0.97953 |
| SI36                                    | 0.93981 | 0.36738 | 0.18899 |
| SI37                                    | 0.92819 | 0.43879 | 0.84779 |
| SI38                                    | 0.77824 | 0.43417 | 0.47778 |
| SI39                                    | 0.61987 | 0.42998 | 0.48541 |
| SI40                                    | 0.56597 | 0.46744 | 0.70023 |

|      |         |         |         |
|------|---------|---------|---------|
| SI41 | 0.6794  | 0.43035 | 0.82822 |
| SI42 | 0.91912 | 0.67079 | 0.82531 |
| SI43 | 0.80471 | 0.63605 | 0.68376 |
| SI44 | 0.76664 | 0.66484 | 0.46505 |
| SI45 | 0.61196 | 0.66839 | 0.4851  |
| SI46 | 0.56736 | 0.62471 | 0.7031  |
| SI47 | 0.68756 | 0.67399 | 0.8182  |
| SI48 | 0.57671 | 0.93907 | 0.36176 |
| SI49 | 0.69424 | 0.96435 | 0.21636 |
| SI50 | 0.7211  | 0.93466 | 0.99549 |
| SI51 | 0.88077 | 0.93042 | 0.99442 |
| SI52 | 0.9326  | 0.96715 | 0.20358 |
| SI53 | 0.8207  | 0.94179 | 0.35315 |
| SI54 | 0.57918 | 0.17064 | 0.33219 |
| SI55 | 0.69597 | 0.11931 | 0.19743 |
| SI56 | 0.73442 | 0.16423 | 0.97891 |
| SI57 | 0.88835 | 0.16819 | 0.98219 |
| SI58 | 0.9386  | 0.1247  | 0.1942  |
| SI59 | 0.8189  | 0.16242 | 0.32404 |
| SI60 | 0.92544 | 0.04921 | 0.85373 |
| SI61 | 0.80245 | 0.02068 | 0.70992 |
| SI62 | 0.7809  | 0.06125 | 0.49148 |
| SI63 | 0.62122 | 0.06741 | 0.48938 |
| SI64 | 0.57164 | 0.02577 | 0.70042 |
| SI65 | 0.67979 | 0.04977 | 0.85289 |
| SI66 | 0.92188 | 0.82379 | 0.8373  |
| SI67 | 0.80269 | 0.86312 | 0.69234 |
| SI68 | 0.76879 | 0.82129 | 0.47528 |
| SI69 | 0.61466 | 0.82213 | 0.49446 |
| SI70 | 0.5668  | 0.86841 | 0.70365 |
| SI71 | 0.68227 | 0.82751 | 0.83553 |
| SI72 | 0.42421 | 0.44252 | 0.64384 |
| SI73 | 0.30921 | 0.47004 | 0.79848 |
| SI74 | 0.29117 | 0.42969 | 0.01174 |
| SI75 | 0.1329  | 0.43216 | 0.01363 |
| SI76 | 0.07716 | 0.469   | 0.80397 |
| SI77 | 0.19033 | 0.44389 | 0.66149 |
| SI78 | 0.4286  | 0.66788 | 0.66443 |
| SI79 | 0.30524 | 0.62584 | 0.79949 |
| SI80 | 0.27115 | 0.67099 | 0.01313 |
| SI81 | 0.1164  | 0.67017 | 0.01351 |
| SI82 | 0.06557 | 0.62651 | 0.80355 |
| SI83 | 0.1822  | 0.66393 | 0.6669  |
| SI84 | 0.08015 | 0.5524  | 0.15129 |



|      |         |         |         |
|------|---------|---------|---------|
| SI85 | 0.20429 | 0.52496 | 0.28681 |
| SI86 | 0.23115 | 0.56254 | 0.51355 |
| SI87 | 0.38889 | 0.5662  | 0.50782 |
| SI88 | 0.43262 | 0.5263  | 0.29424 |
| SI89 | 0.32871 | 0.55217 | 0.14037 |
| SI90 | 0.08724 | 0.32435 | 0.1646  |
| SI91 | 0.20029 | 0.36565 | 0.31156 |
| SI92 | 0.23707 | 0.3274  | 0.53107 |
| SI93 | 0.3919  | 0.3245  | 0.51431 |
| SI94 | 0.43636 | 0.36896 | 0.29638 |
| SI95 | 0.31932 | 0.31993 | 0.17281 |
| O96  | 0.3616  | 0.05906 | 0.71547 |
| O97  | 0.30399 | 0.06131 | 0.8922  |
| O98  | 0.2016  | 0.04653 | 0.01991 |
| O99  | 0.09971 | 0.06392 | 0.89469 |
| O100 | 0.10558 | 0.05363 | 0.69754 |
| O101 | 0.23259 | 0.02896 | 0.73472 |
| O102 | 0.36202 | 0.82148 | 0.75072 |
| O103 | 0.30722 | 0.84325 | 0.92535 |
| O104 | 0.19182 | 0.85047 | 0.02091 |
| O105 | 0.08777 | 0.82698 | 0.90423 |
| O106 | 0.10642 | 0.83257 | 0.70848 |
| O107 | 0.23232 | 0.85067 | 0.76195 |
| O108 | 0.32472 | 0.94424 | 0.79884 |
| O109 | 0.08757 | 0.94471 | 0.81156 |
| O110 | 0.43538 | 0.12168 | 0.57917 |
| O111 | 0.4194  | 0.99035 | 0.56544 |
| O112 | 0.39895 | 0.85868 | 0.56741 |
| O113 | 0.19653 | 0.12602 | 0.60749 |
| O114 | 0.18047 | 0.99624 | 0.55902 |
| O115 | 0.19687 | 0.86227 | 0.5696  |
| O116 | 0.99114 | 0.03614 | 0.78576 |
| O117 | 0.98687 | 0.85917 | 0.78581 |
| O118 | 0.14252 | 0.93658 | 0.22113 |
| O119 | 0.20016 | 0.92457 | 0.39639 |
| O120 | 0.29913 | 0.94277 | 0.52848 |
| O121 | 0.39772 | 0.92408 | 0.39675 |
| O122 | 0.39709 | 0.94371 | 0.20014 |
| O123 | 0.27064 | 0.96767 | 0.24129 |
| O124 | 0.14484 | 0.16493 | 0.24091 |
| O125 | 0.19937 | 0.16142 | 0.41663 |
| O126 | 0.31262 | 0.1443  | 0.51606 |
| O127 | 0.41457 | 0.16901 | 0.39421 |
| O128 | 0.39701 | 0.14788 | 0.20006 |

|      |         |         |         |
|------|---------|---------|---------|
| O129 | 0.27241 | 0.13107 | 0.25654 |
| O130 | 0.17868 | 0.04678 | 0.31968 |
| O131 | 0.41969 | 0.04548 | 0.32531 |
| O132 | 0.06927 | 0.86935 | 0.09069 |
| O133 | 0.08252 | 0.00061 | 0.06862 |
| O134 | 0.10213 | 0.1322  | 0.05987 |
| O135 | 0.30495 | 0.86628 | 0.12085 |
| O136 | 0.31864 | 0.99228 | 0.05874 |
| O137 | 0.30412 | 0.12612 | 0.062   |
| O138 | 0.5103  | 0.94919 | 0.29447 |
| O139 | 0.51667 | 0.13204 | 0.2791  |
| O140 | 0.63797 | 0.56964 | 0.25975 |
| O141 | 0.68059 | 0.56425 | 0.07208 |
| O142 | 0.79933 | 0.54002 | 0.98584 |
| O143 | 0.90848 | 0.56806 | 0.09161 |
| O144 | 0.88763 | 0.55046 | 0.28458 |
| O145 | 0.76485 | 0.54507 | 0.21673 |
| O146 | 0.64317 | 0.33074 | 0.25168 |
| O147 | 0.69243 | 0.34389 | 0.0717  |
| O148 | 0.8099  | 0.34922 | 0.9762  |
| O149 | 0.91511 | 0.32449 | 0.09272 |
| O150 | 0.90541 | 0.33431 | 0.2882  |
| O151 | 0.76998 | 0.36723 | 0.22901 |
| O152 | 0.67106 | 0.45195 | 0.1831  |
| O153 | 0.91895 | 0.44564 | 0.17272 |
| O154 | 0.5684  | 0.62382 | 0.40711 |
| O155 | 0.60346 | 0.496   | 0.41908 |
| O156 | 0.5934  | 0.36238 | 0.43136 |
| O157 | 0.79681 | 0.6234  | 0.37142 |
| O158 | 0.78935 | 0.49011 | 0.39133 |
| O159 | 0.80878 | 0.36086 | 0.43403 |
| O160 | 0.01053 | 0.54051 | 0.21157 |
| O161 | 0.02053 | 0.36353 | 0.20179 |
| O162 | 0.8712  | 0.43484 | 0.76306 |
| O163 | 0.82017 | 0.44669 | 0.57822 |
| O164 | 0.70008 | 0.42439 | 0.49849 |
| O165 | 0.58476 | 0.43381 | 0.59344 |
| O166 | 0.60128 | 0.42954 | 0.79298 |
| O167 | 0.72623 | 0.44449 | 0.73419 |
| O168 | 0.86559 | 0.6782  | 0.73535 |
| O169 | 0.81074 | 0.64751 | 0.56323 |
| O170 | 0.68925 | 0.64262 | 0.48311 |
| O171 | 0.58235 | 0.66066 | 0.59674 |
| O172 | 0.6096  | 0.66096 | 0.79101 |

|      |         |         |         |
|------|---------|---------|---------|
| O173 | 0.73287 | 0.66852 | 0.71744 |
| O174 | 0.81094 | 0.55914 | 0.71493 |
| O175 | 0.58788 | 0.54613 | 0.69721 |
| O176 | 0.93362 | 0.36747 | 0.9073  |
| O177 | 0.91899 | 0.49966 | 0.92641 |
| O178 | 0.88844 | 0.62981 | 0.91987 |
| O179 | 0.69483 | 0.35682 | 0.8761  |
| O180 | 0.68817 | 0.4878  | 0.9144  |
| O181 | 0.71238 | 0.62134 | 0.90188 |
| O182 | 0.48583 | 0.4606  | 0.71725 |
| O183 | 0.48844 | 0.63395 | 0.7297  |
| O184 | 0.64035 | 0.92774 | 0.28845 |
| O185 | 0.69832 | 0.92491 | 0.11072 |
| O186 | 0.80133 | 0.9453  | 0.98514 |
| O187 | 0.90207 | 0.92412 | 0.11095 |
| O188 | 0.8955  | 0.947   | 0.30717 |
| O189 | 0.7678  | 0.96263 | 0.2669  |
| O190 | 0.64437 | 0.16492 | 0.26086 |
| O191 | 0.69827 | 0.14745 | 0.08435 |
| O192 | 0.81212 | 0.13947 | 0.98394 |
| O193 | 0.91822 | 0.16675 | 0.09479 |
| O194 | 0.89634 | 0.15175 | 0.2897  |
| O195 | 0.77006 | 0.12203 | 0.24797 |
| O196 | 0.67101 | 0.0417  | 0.19836 |
| O197 | 0.92164 | 0.04598 | 0.17682 |
| O198 | 0.56723 | 0.87256 | 0.43075 |
| O199 | 0.58613 | 0.0041  | 0.434   |
| O200 | 0.59442 | 0.13731 | 0.44131 |
| O201 | 0.8079  | 0.86595 | 0.39243 |
| O202 | 0.81413 | 0.99346 | 0.44692 |
| O203 | 0.81429 | 0.12766 | 0.43729 |
| O204 | 0.01149 | 0.95125 | 0.21918 |
| O205 | 0.01775 | 0.13529 | 0.21595 |
| O206 | 0.86055 | 0.04987 | 0.78164 |
| O207 | 0.79946 | 0.06679 | 0.60915 |
| O208 | 0.70141 | 0.06175 | 0.47155 |
| O209 | 0.60449 | 0.0675  | 0.6078  |
| O210 | 0.60524 | 0.04858 | 0.8055  |
| O211 | 0.73116 | 0.02436 | 0.76675 |
| O212 | 0.86023 | 0.82941 | 0.75998 |
| O213 | 0.8051  | 0.82775 | 0.58336 |
| O214 | 0.69188 | 0.84776 | 0.48526 |
| O215 | 0.59134 | 0.82214 | 0.61057 |
| O216 | 0.60501 | 0.84273 | 0.80397 |

|      |          |         |         |
|------|----------|---------|---------|
| O217 | 0.72983  | 0.85182 | 0.74331 |
| O218 | 0.81724  | 0.94317 | 0.67979 |
| O219 | 0.58523  | 0.94636 | 0.67996 |
| O220 | 0.93314  | 0.12214 | 0.90761 |
| O221 | 0.92039  | 0.99183 | 0.94004 |
| O222 | 0.9015   | 0.86022 | 0.94157 |
| O223 | 0.69683  | 0.12577 | 0.88805 |
| O224 | 0.68369  | 1.00032 | 0.94949 |
| O225 | 0.69966  | 0.86742 | 0.93705 |
| O226 | 0.49247  | 0.04149 | 0.71076 |
| O227 | 0.4865   | 0.86167 | 0.71947 |
| O228 | 0.35663  | 0.44249 | 0.71007 |
| O229 | 0.31675  | 0.42272 | 0.89682 |
| O230 | 0.21216  | 0.44917 | 0.01688 |
| O231 | 0.10795  | 0.42799 | 0.89828 |
| O232 | 0.11269  | 0.44968 | 0.69804 |
| O233 | 0.23256  | 0.46487 | 0.75998 |
| O234 | 0.35913  | 0.65922 | 0.72479 |
| O235 | 0.30338  | 0.66957 | 0.90171 |
| O236 | 0.19391  | 0.64485 | 0.01006 |
| O237 | 0.08619  | 0.67037 | 0.90094 |
| O238 | 0.10554  | 0.65337 | 0.70515 |
| O239 | 0.23154  | 0.62839 | 0.74806 |
| O240 | 0.32519  | 0.54836 | 0.82513 |
| O241 | 0.08488  | 0.54873 | 0.82586 |
| O242 | 0.4348   | 0.36914 | 0.59315 |
| O243 | 0.42005  | 0.49746 | 0.55385 |
| O244 | 0.42486  | 0.6317  | 0.55563 |
| O245 | 0.20579  | 0.36794 | 0.62535 |
| O246 | 0.20717  | 0.49359 | 0.56848 |
| O247 | 0.19231  | 0.62785 | 0.55877 |
| O248 | -0.00086 | 0.44896 | 0.78908 |
| O249 | 0.98596  | 0.63325 | 0.7828  |
| O250 | 0.14082  | 0.56029 | 0.23156 |
| O251 | 0.21756  | 0.55945 | 0.39458 |
| O252 | 0.31022  | 0.57085 | 0.53471 |
| O253 | 0.40123  | 0.56668 | 0.38869 |
| O254 | 0.40085  | 0.55887 | 0.19404 |
| O255 | 0.2711   | 0.53492 | 0.22137 |
| O256 | 0.14126  | 0.32514 | 0.25471 |
| O257 | 0.1982   | 0.34529 | 0.42815 |
| O258 | 0.31473  | 0.35014 | 0.51589 |
| O259 | 0.42128  | 0.33192 | 0.40206 |
| O260 | 0.39641  | 0.33167 | 0.20616 |

|      |         |         |         |
|------|---------|---------|---------|
| O261 | 0.27239 | 0.34692 | 0.2636  |
| O262 | 0.18721 | 0.44573 | 0.299   |
| O263 | 0.41291 | 0.4471  | 0.30319 |
| O264 | 0.07378 | 0.62114 | 0.08627 |
| O265 | 0.09281 | 0.49012 | 0.07459 |
| O266 | 0.11832 | 0.35961 | 0.06509 |
| O267 | 0.31371 | 0.6231  | 0.08644 |
| O268 | 0.33345 | 0.49064 | 0.06125 |
| O269 | 0.30361 | 0.35911 | 0.06903 |
| O270 | 0.51268 | 0.5347  | 0.28714 |
| O271 | 0.51553 | 0.3633  | 0.27099 |
| O272 | 0.44366 | 0.74648 | 0.64402 |
| O273 | 0.19862 | 0.74323 | 0.6545  |
| O274 | 0.27443 | 0.74717 | 0.05533 |
| O275 | 0.11147 | 0.74619 | 0.05699 |
| O276 | 0.06802 | 0.24751 | 0.13684 |
| O277 | 0.30526 | 0.24104 | 0.15363 |
| O278 | 0.23353 | 0.24813 | 0.55782 |
| O279 | 0.39681 | 0.24673 | 0.55004 |
| O280 | 0.56102 | 0.24887 | 0.34843 |
| O281 | 0.80118 | 0.24013 | 0.33278 |
| O282 | 0.73084 | 0.24329 | 0.95585 |
| O283 | 0.89113 | 0.24474 | 0.94035 |
| O284 | 0.93847 | 0.74598 | 0.86314 |
| O285 | 0.69415 | 0.74932 | 0.86292 |
| O286 | 0.77118 | 0.74411 | 0.43756 |
| O287 | 0.60731 | 0.74653 | 0.45078 |
| O288 | 0.97147 | 0.26035 | 0.42464 |
| O289 | 0.92205 | 0.16698 | 0.53447 |
| O290 | 0.8767  | 0.28802 | 0.54792 |
| O291 | -0.0108 | 0.25025 | 0.61482 |
| O292 | 0.08656 | 0.28911 | 0.54226 |
| O293 | 0.07598 | 0.27934 | 0.70951 |
| GA29 | 0.93348 | 0.39883 | 0.61753 |
| H295 | 0.94753 | 0.28947 | 0.37347 |
| H296 | 0.8341  | 0.33053 | 0.48597 |
| H297 | 0.88002 | 0.15109 | 0.50045 |
| H298 | 0.97149 | 0.53187 | 0.6154  |
| H299 | 0.04108 | 0.2644  | 0.75582 |
| H300 | 0.11015 | 0.54016 | 0.53074 |
| H301 | 0.09669 | 0.54915 | 0.40105 |
| H302 | 0.00028 | 0.60951 | 0.42306 |
| H303 | 0.03604 | 0.62622 | 0.54164 |
| H304 | 0.91548 | 0.58608 | 0.55292 |

|                           |         |         |         |
|---------------------------|---------|---------|---------|
| H305                      | 0.96822 | 0.41345 | 0.38191 |
| H306                      | 0.08717 | 0.4315  | 0.41873 |
| H307                      | 0.8862  | 0.49272 | 0.44712 |
| H308                      | 0.05876 | 0.43768 | 0.54174 |
| AL30                      | 0.81903 | 0.32332 | 0.3104  |
| AL31                      | 0.80357 | 0.47366 | 0.70144 |
| P311                      | 0.93572 | 0.24359 | 0.52492 |
| C312                      | 0.95691 | 0.55109 | 0.54056 |
| C313                      | 0.0731  | 0.53532 | 0.4717  |
| C314                      | 0.01722 | 0.58593 | 0.49298 |
| C315                      | 0.98274 | 0.45265 | 0.43438 |
| C316                      | 0.93715 | 0.49532 | 0.4719  |
| C317                      | 0.05314 | 0.46021 | 0.46653 |
| C318                      | 0.05466 | 0.2746  | 0.61505 |
| <b>TS<sub>CO+OH</sub></b> |         |         |         |
| SI2                       | 0.42631 | 0.0533  | 0.64205 |
| SI3                       | 0.3062  | 0.02344 | 0.78486 |
| SI4                       | 0.28135 | 0.05681 | 0.00748 |
| SI5                       | 0.12133 | 0.05986 | 0.00919 |
| SI6                       | 0.06995 | 0.02486 | 0.79581 |
| SI7                       | 0.1802  | 0.05225 | 0.64868 |
| SI8                       | 0.4234  | 0.82285 | 0.66944 |
| SI9                       | 0.3065  | 0.86525 | 0.80823 |
| SI10                      | 0.26932 | 0.82662 | 0.02796 |
| SI11                      | 0.11481 | 0.82359 | 0.01711 |
| SI12                      | 0.0658  | 0.86674 | 0.80193 |
| SI13                      | 0.1835  | 0.82279 | 0.6737  |
| SI14                      | 0.07792 | 0.93995 | 0.15012 |
| SI15                      | 0.19838 | 0.96964 | 0.29485 |
| SI16                      | 0.21924 | 0.93188 | 0.51394 |
| SI17                      | 0.37845 | 0.92913 | 0.51367 |
| SI18                      | 0.43084 | 0.96514 | 0.3033  |
| SI19                      | 0.32128 | 0.94257 | 0.15415 |
| SI20                      | 0.08206 | 0.16883 | 0.16331 |
| SI21                      | 0.1986  | 0.1261  | 0.30811 |
| SI22                      | 0.23512 | 0.17106 | 0.52349 |
| SI23                      | 0.39    | 0.17122 | 0.50822 |
| SI24                      | 0.43739 | 0.12296 | 0.29821 |
| SI25                      | 0.31944 | 0.1621  | 0.16812 |
| SI26                      | 0.57832 | 0.55268 | 0.34849 |
| SI27                      | 0.69192 | 0.52668 | 0.19016 |
| SI28                      | 0.71529 | 0.561   | 0.97969 |
| SI29                      | 0.874   | 0.56065 | 0.97803 |

|      |         |         |         |
|------|---------|---------|---------|
| SI30 | 0.93413 | 0.52465 | 0.18775 |
| SI31 | 0.81604 | 0.55137 | 0.32015 |
| SI32 | 0.57675 | 0.32653 | 0.33272 |
| SI33 | 0.6999  | 0.37092 | 0.1977  |
| SI34 | 0.73068 | 0.31972 | 0.98669 |
| SI35 | 0.885   | 0.32264 | 0.9824  |
| SI36 | 0.94063 | 0.36585 | 0.19372 |
| SI37 | 0.92793 | 0.43813 | 0.84269 |
| SI38 | 0.77402 | 0.43446 | 0.47183 |
| SI39 | 0.61746 | 0.42893 | 0.4836  |
| SI40 | 0.57613 | 0.46735 | 0.70073 |
| SI41 | 0.68078 | 0.4325  | 0.85288 |
| SI42 | 0.91965 | 0.67068 | 0.82568 |
| SI43 | 0.80469 | 0.63059 | 0.68852 |
| SI44 | 0.76737 | 0.66193 | 0.46751 |
| SI45 | 0.61267 | 0.66807 | 0.48216 |
| SI46 | 0.56799 | 0.62485 | 0.69989 |
| SI47 | 0.68504 | 0.67501 | 0.82064 |
| SI48 | 0.57537 | 0.93835 | 0.36026 |
| SI49 | 0.69324 | 0.96493 | 0.21472 |
| SI50 | 0.72074 | 0.93589 | 0.99491 |
| SI51 | 0.88033 | 0.93161 | 0.99105 |
| SI52 | 0.93371 | 0.96619 | 0.19987 |
| SI53 | 0.82072 | 0.9388  | 0.34778 |
| SI54 | 0.58042 | 0.17031 | 0.32849 |
| SI55 | 0.69543 | 0.12024 | 0.19208 |
| SI56 | 0.73481 | 0.16318 | 0.97352 |
| SI57 | 0.88862 | 0.16866 | 0.98075 |
| SI58 | 0.93781 | 0.12369 | 0.19246 |
| SI59 | 0.818   | 0.16154 | 0.32301 |
| SI60 | 0.92477 | 0.05135 | 0.84968 |
| SI61 | 0.80339 | 0.0203  | 0.70767 |
| SI62 | 0.78006 | 0.05602 | 0.48658 |
| SI63 | 0.62137 | 0.06477 | 0.48522 |
| SI64 | 0.57202 | 0.02644 | 0.69605 |
| SI65 | 0.6807  | 0.04862 | 0.84907 |
| SI66 | 0.92089 | 0.82354 | 0.83414 |
| SI67 | 0.80478 | 0.86381 | 0.6889  |
| SI68 | 0.76966 | 0.82023 | 0.47235 |
| SI69 | 0.61571 | 0.82171 | 0.49257 |
| SI70 | 0.56739 | 0.86947 | 0.70014 |
| SI71 | 0.68378 | 0.83056 | 0.83078 |
| SI72 | 0.43007 | 0.4433  | 0.64063 |
| SI73 | 0.31115 | 0.47074 | 0.79223 |

|      |         |         |         |
|------|---------|---------|---------|
| SI74 | 0.29222 | 0.42933 | 0.00801 |
| SI75 | 0.13475 | 0.43116 | 0.01165 |
| SI76 | 0.08132 | 0.47184 | 0.80537 |
| SI77 | 0.18825 | 0.44615 | 0.6519  |
| SI78 | 0.42811 | 0.66772 | 0.6607  |
| SI79 | 0.30491 | 0.62642 | 0.79678 |
| SI80 | 0.27134 | 0.67117 | 0.01063 |
| SI81 | 0.11711 | 0.6711  | 0.00925 |
| SI82 | 0.06708 | 0.62825 | 0.80116 |
| SI83 | 0.18241 | 0.66441 | 0.66317 |
| SI84 | 0.08111 | 0.55246 | 0.14373 |
| SI85 | 0.20489 | 0.52575 | 0.28076 |
| SI86 | 0.22959 | 0.56327 | 0.50635 |
| SI87 | 0.38835 | 0.56601 | 0.50428 |
| SI88 | 0.43345 | 0.52663 | 0.2899  |
| SI89 | 0.32981 | 0.55152 | 0.13564 |
| SI90 | 0.08729 | 0.32373 | 0.16176 |
| SI91 | 0.20202 | 0.36698 | 0.30525 |
| SI92 | 0.2374  | 0.32815 | 0.52707 |
| SI93 | 0.39206 | 0.32549 | 0.51191 |
| SI94 | 0.4361  | 0.36877 | 0.2928  |
| SI95 | 0.32103 | 0.32051 | 0.16684 |
| O96  | 0.36189 | 0.05938 | 0.71506 |
| O97  | 0.30456 | 0.06165 | 0.89183 |
| O98  | 0.20109 | 0.04669 | 0.01739 |
| O99  | 0.0984  | 0.06392 | 0.89355 |
| O100 | 0.1059  | 0.05448 | 0.69656 |
| O101 | 0.2328  | 0.02948 | 0.7346  |
| O102 | 0.36259 | 0.82181 | 0.74963 |
| O103 | 0.30814 | 0.84351 | 0.92467 |
| O104 | 0.19174 | 0.85024 | 0.01709 |
| O105 | 0.08523 | 0.82888 | 0.90504 |
| O106 | 0.10632 | 0.83202 | 0.70973 |
| O107 | 0.23272 | 0.85042 | 0.76167 |
| O108 | 0.32484 | 0.94448 | 0.79803 |
| O109 | 0.08656 | 0.94535 | 0.80877 |
| O110 | 0.43477 | 0.12244 | 0.57843 |
| O111 | 0.41914 | 0.99079 | 0.56458 |
| O112 | 0.39938 | 0.85876 | 0.56632 |
| O113 | 0.19753 | 0.12707 | 0.60818 |
| O114 | 0.18119 | 0.99773 | 0.55809 |
| O115 | 0.19578 | 0.86354 | 0.57019 |
| O116 | 0.99048 | 0.0371  | 0.78223 |
| O117 | 0.98586 | 0.85969 | 0.78369 |



|      |         |         |         |
|------|---------|---------|---------|
| O118 | 0.1435  | 0.93738 | 0.22051 |
| O119 | 0.2004  | 0.92492 | 0.39641 |
| O120 | 0.29911 | 0.94265 | 0.52903 |
| O121 | 0.39685 | 0.9244  | 0.39588 |
| O122 | 0.39648 | 0.94318 | 0.19861 |
| O123 | 0.27109 | 0.96853 | 0.2415  |
| O124 | 0.14395 | 0.16463 | 0.24057 |
| O125 | 0.19842 | 0.16217 | 0.41644 |
| O126 | 0.31242 | 0.14661 | 0.5145  |
| O127 | 0.41498 | 0.16874 | 0.39308 |
| O128 | 0.39677 | 0.14794 | 0.19944 |
| O129 | 0.27203 | 0.13253 | 0.25689 |
| O130 | 0.17912 | 0.04721 | 0.32032 |
| O131 | 0.42024 | 0.04505 | 0.32331 |
| O132 | 0.07026 | 0.86834 | 0.09311 |
| O133 | 0.08281 | 0.99916 | 0.06645 |
| O134 | 0.10137 | 0.13109 | 0.05974 |
| O135 | 0.30323 | 0.86644 | 0.12046 |
| O136 | 0.31777 | 0.9922  | 0.0579  |
| O137 | 0.30327 | 0.12605 | 0.06222 |
| O138 | 0.50924 | 0.94654 | 0.29179 |
| O139 | 0.51692 | 0.13179 | 0.27791 |
| O140 | 0.64385 | 0.55481 | 0.27823 |
| O141 | 0.68048 | 0.57055 | 0.08906 |
| O142 | 0.79512 | 0.54889 | 0.99357 |
| O143 | 0.9118  | 0.56177 | 0.08514 |
| O144 | 0.89341 | 0.55465 | 0.28296 |
| O145 | 0.76916 | 0.53842 | 0.22368 |
| O146 | 0.64499 | 0.33713 | 0.2717  |
| O147 | 0.70118 | 0.32323 | 0.09911 |
| O148 | 0.8077  | 0.34826 | 0.98286 |
| O149 | 0.91647 | 0.32587 | 0.09385 |
| O150 | 0.90779 | 0.33214 | 0.29257 |
| O151 | 0.77242 | 0.37198 | 0.24846 |
| O152 | 0.67704 | 0.44753 | 0.16916 |
| O153 | 0.92015 | 0.44455 | 0.18001 |
| O154 | 0.56867 | 0.62501 | 0.40289 |
| O155 | 0.58383 | 0.49552 | 0.43484 |
| O156 | 0.58147 | 0.36118 | 0.44294 |
| O157 | 0.79944 | 0.62253 | 0.37318 |
| O158 | 0.80633 | 0.49016 | 0.39862 |
| O159 | 0.81177 | 0.36047 | 0.44466 |
| O160 | 0.01313 | 0.54014 | 0.20727 |
| O161 | 0.02195 | 0.3631  | 0.20302 |

|      |         |         |         |
|------|---------|---------|---------|
| O162 | 0.88485 | 0.43001 | 0.73897 |
| O163 | 0.79301 | 0.44791 | 0.58413 |
| O164 | 0.69536 | 0.42642 | 0.44989 |
| O165 | 0.60856 | 0.43142 | 0.60308 |
| O166 | 0.60778 | 0.43344 | 0.79882 |
| O167 | 0.74231 | 0.43529 | 0.77788 |
| O168 | 0.8654  | 0.67532 | 0.73628 |
| O169 | 0.80846 | 0.64186 | 0.56756 |
| O170 | 0.68931 | 0.64044 | 0.48102 |
| O171 | 0.58243 | 0.66099 | 0.59356 |
| O172 | 0.60739 | 0.66337 | 0.78894 |
| O173 | 0.7324  | 0.66061 | 0.72426 |
| O174 | 0.81428 | 0.55425 | 0.72185 |
| O175 | 0.59254 | 0.54735 | 0.69542 |
| O176 | 0.92905 | 0.36876 | 0.90628 |
| O177 | 0.90343 | 0.49899 | 0.91191 |
| O178 | 0.88971 | 0.63112 | 0.922   |
| O179 | 0.68237 | 0.36248 | 0.91502 |
| O180 | 0.68099 | 0.49634 | 0.92905 |
| O181 | 0.7044  | 0.62857 | 0.91503 |
| O182 | 0.49584 | 0.45687 | 0.70694 |
| O183 | 0.488   | 0.6307  | 0.72232 |
| O184 | 0.64    | 0.92897 | 0.28855 |
| O185 | 0.69506 | 0.92535 | 0.10878 |
| O186 | 0.80097 | 0.94811 | 0.9903  |
| O187 | 0.90652 | 0.92323 | 0.105   |
| O188 | 0.89522 | 0.94372 | 0.30104 |
| O189 | 0.7675  | 0.96195 | 0.2631  |
| O190 | 0.6431  | 0.16738 | 0.25209 |
| O191 | 0.69711 | 0.14495 | 0.0772  |
| O192 | 0.81262 | 0.13937 | 0.98182 |
| O193 | 0.91854 | 0.16637 | 0.09329 |
| O194 | 0.89478 | 0.14915 | 0.28748 |
| O195 | 0.7693  | 0.12473 | 0.24227 |
| O196 | 0.67062 | 0.04254 | 0.19797 |
| O197 | 0.92189 | 0.04487 | 0.1734  |
| O198 | 0.56762 | 0.87163 | 0.42923 |
| O199 | 0.58061 | 0.00383 | 0.43263 |
| O200 | 0.5999  | 0.13575 | 0.43501 |
| O201 | 0.80703 | 0.86237 | 0.38465 |
| O202 | 0.81626 | 0.98942 | 0.4432  |
| O203 | 0.80912 | 0.12445 | 0.43354 |
| O204 | 0.01257 | 0.95182 | 0.21933 |
| O205 | 0.01686 | 0.13499 | 0.21569 |

|      |         |         |         |
|------|---------|---------|---------|
| O206 | 0.85999 | 0.05438 | 0.77732 |
| O207 | 0.79689 | 0.0631  | 0.60451 |
| O208 | 0.70046 | 0.05103 | 0.46672 |
| O209 | 0.6047  | 0.0686  | 0.60371 |
| O210 | 0.60631 | 0.04788 | 0.80113 |
| O211 | 0.73209 | 0.02017 | 0.76497 |
| O212 | 0.86017 | 0.82523 | 0.75488 |
| O213 | 0.80731 | 0.8313  | 0.57826 |
| O214 | 0.6929  | 0.84703 | 0.48275 |
| O215 | 0.59235 | 0.82175 | 0.60879 |
| O216 | 0.6064  | 0.84692 | 0.80133 |
| O217 | 0.73093 | 0.85457 | 0.73789 |
| O218 | 0.82351 | 0.94318 | 0.68239 |
| O219 | 0.58428 | 0.94716 | 0.67268 |
| O220 | 0.93373 | 0.12328 | 0.90583 |
| O221 | 0.91851 | 0.99274 | 0.9342  |
| O222 | 0.89755 | 0.86119 | 0.93584 |
| O223 | 0.69928 | 0.12487 | 0.8807  |
| O224 | 0.68305 | 0.00109 | 0.94792 |
| O225 | 0.70264 | 0.86894 | 0.9331  |
| O226 | 0.49302 | 0.04261 | 0.70858 |
| O227 | 0.48732 | 0.86166 | 0.71766 |
| O228 | 0.36546 | 0.44335 | 0.71329 |
| O229 | 0.3121  | 0.42323 | 0.89079 |
| O230 | 0.2136  | 0.44773 | 0.02385 |
| O231 | 0.11697 | 0.42871 | 0.89316 |
| O232 | 0.11244 | 0.45402 | 0.69563 |
| O233 | 0.23742 | 0.46605 | 0.74271 |
| O234 | 0.35918 | 0.65956 | 0.72271 |
| O235 | 0.30295 | 0.67024 | 0.89883 |
| O236 | 0.19423 | 0.64469 | 0.008   |
| O237 | 0.08918 | 0.67445 | 0.89534 |
| O238 | 0.10537 | 0.65251 | 0.69964 |
| O239 | 0.2313  | 0.62874 | 0.74491 |
| O240 | 0.32467 | 0.54888 | 0.82234 |
| O241 | 0.0885  | 0.5514  | 0.82798 |
| O242 | 0.43747 | 0.37071 | 0.58621 |
| O243 | 0.42288 | 0.50029 | 0.55421 |
| O244 | 0.42023 | 0.63413 | 0.55047 |
| O245 | 0.19908 | 0.3691  | 0.61551 |
| O246 | 0.19961 | 0.49469 | 0.55585 |
| O247 | 0.19402 | 0.62935 | 0.55459 |
| O248 | 0.00304 | 0.45196 | 0.80075 |
| O249 | 0.987   | 0.6332  | 0.78382 |

|      |         |         |         |
|------|---------|---------|---------|
| O250 | 0.14282 | 0.56067 | 0.22198 |
| O251 | 0.21552 | 0.56323 | 0.38727 |
| O252 | 0.30896 | 0.56508 | 0.52898 |
| O253 | 0.40172 | 0.56581 | 0.38537 |
| O254 | 0.40157 | 0.55904 | 0.18975 |
| O255 | 0.27286 | 0.53298 | 0.21733 |
| O256 | 0.14383 | 0.32548 | 0.24855 |
| O257 | 0.20178 | 0.34374 | 0.42093 |
| O258 | 0.31495 | 0.35171 | 0.52081 |
| O259 | 0.4165  | 0.33188 | 0.39709 |
| O260 | 0.39801 | 0.33189 | 0.2006  |
| O261 | 0.27407 | 0.35158 | 0.25486 |
| O262 | 0.18696 | 0.44701 | 0.29777 |
| O263 | 0.41428 | 0.44734 | 0.29884 |
| O264 | 0.07307 | 0.62068 | 0.078   |
| O265 | 0.09226 | 0.48964 | 0.06746 |
| O266 | 0.11612 | 0.35877 | 0.06023 |
| O267 | 0.31397 | 0.62258 | 0.08274 |
| O268 | 0.33546 | 0.4904  | 0.05559 |
| O269 | 0.30768 | 0.35767 | 0.0607  |
| O270 | 0.51328 | 0.53707 | 0.28064 |
| O271 | 0.51552 | 0.36152 | 0.27144 |
| O272 | 0.4445  | 0.74639 | 0.64359 |
| O273 | 0.19839 | 0.74385 | 0.65269 |
| O274 | 0.27459 | 0.74715 | 0.05359 |
| O275 | 0.11197 | 0.74621 | 0.05545 |
| O276 | 0.06788 | 0.24683 | 0.13562 |
| O277 | 0.30536 | 0.24149 | 0.15261 |
| O278 | 0.23119 | 0.24943 | 0.55642 |
| O279 | 0.3973  | 0.24787 | 0.54786 |
| O280 | 0.56098 | 0.24766 | 0.35016 |
| O281 | 0.80145 | 0.23933 | 0.33603 |
| O282 | 0.73028 | 0.24232 | 0.94962 |
| O283 | 0.89045 | 0.24585 | 0.94179 |
| O284 | 0.93897 | 0.74624 | 0.86164 |
| O285 | 0.69453 | 0.75208 | 0.85554 |
| O286 | 0.77262 | 0.74156 | 0.4427  |
| O287 | 0.60915 | 0.74624 | 0.44833 |
| O288 | 0.94242 | 0.22802 | 0.45403 |
| O289 | 0.84966 | 0.20629 | 0.58117 |
| O290 | 0.89876 | 0.32083 | 0.56873 |
| O291 | 0.96966 | 0.22305 | 0.63896 |
| O292 | 0.06534 | 0.31429 | 0.5125  |
| O293 | 0.04222 | 0.30981 | 0.68853 |

|                                            |         |         |         |
|--------------------------------------------|---------|---------|---------|
| GA29                                       | 0.96486 | 0.38515 | 0.63423 |
| H295                                       | 0.93819 | 0.26323 | 0.40262 |
| H296                                       | 0.8438  | 0.34345 | 0.50075 |
| H297                                       | 0.83575 | 0.17461 | 0.52734 |
| H298                                       | 0.97958 | 0.54529 | 0.63298 |
| H299                                       | 0.00981 | 0.27433 | 0.71462 |
| H300                                       | 0.09261 | 0.54626 | 0.5359  |
| H301                                       | 0.0943  | 0.57412 | 0.41085 |
| H302                                       | 0.97304 | 0.59732 | 0.41726 |
| H303                                       | 0.01414 | 0.63687 | 0.51916 |
| H304                                       | 0.90824 | 0.57544 | 0.57142 |
| H305                                       | 0.96848 | 0.40223 | 0.41689 |
| H306                                       | 0.06192 | 0.46774 | 0.35093 |
| H307                                       | 0.89063 | 0.46182 | 0.52476 |
| H308                                       | 0.08664 | 0.43961 | 0.46778 |
| AL30                                       | 0.82269 | 0.32246 | 0.32109 |
| AL31                                       | 0.80516 | 0.4684  | 0.70744 |
| P311                                       | 0.91745 | 0.24405 | 0.56455 |
| C312                                       | 0.95562 | 0.54918 | 0.55887 |
| C313                                       | 0.06384 | 0.54757 | 0.46623 |
| C314                                       | 0.00063 | 0.58786 | 0.48698 |
| C315                                       | 0.98363 | 0.44953 | 0.45207 |
| C316                                       | 0.94131 | 0.48101 | 0.51611 |
| C317                                       | 0.05139 | 0.47489 | 0.43087 |
| C318                                       | 0.0655  | 0.29072 | 0.5937  |
| <b>C<sub>6</sub>H<sub>10</sub>Ga-OH+CO</b> |         |         |         |
| SI2                                        | 0.42648 | 0.05478 | 0.64204 |
| SI3                                        | 0.30643 | 0.02426 | 0.7847  |
| SI4                                        | 0.28146 | 0.05779 | 0.00726 |
| SI5                                        | 0.12128 | 0.06031 | 0.00911 |
| SI6                                        | 0.07016 | 0.02572 | 0.79544 |
| SI7                                        | 0.18053 | 0.05335 | 0.64853 |
| SI8                                        | 0.4239  | 0.82353 | 0.66978 |
| SI9                                        | 0.30687 | 0.86617 | 0.80831 |
| SI10                                       | 0.26912 | 0.82736 | 0.02776 |
| SI11                                       | 0.11438 | 0.82426 | 0.01832 |
| SI12                                       | 0.06565 | 0.86751 | 0.80266 |
| SI13                                       | 0.18369 | 0.8238  | 0.67411 |
| SI14                                       | 0.07846 | 0.9407  | 0.15082 |
| SI15                                       | 0.19896 | 0.97075 | 0.29544 |
| SI16                                       | 0.21953 | 0.93308 | 0.51443 |

|      |         |         |         |
|------|---------|---------|---------|
| SI17 | 0.37876 | 0.93032 | 0.5141  |
| SI18 | 0.43054 | 0.96569 | 0.30325 |
| SI19 | 0.32114 | 0.94342 | 0.15377 |
| SI20 | 0.08092 | 0.16905 | 0.16434 |
| SI21 | 0.1984  | 0.12715 | 0.30863 |
| SI22 | 0.23547 | 0.17193 | 0.524   |
| SI23 | 0.38935 | 0.17218 | 0.5087  |
| SI24 | 0.43752 | 0.12369 | 0.299   |
| SI25 | 0.31962 | 0.16295 | 0.16809 |
| SI26 | 0.57693 | 0.55148 | 0.34958 |
| SI27 | 0.69121 | 0.52425 | 0.19228 |
| SI28 | 0.71354 | 0.56476 | 0.98378 |
| SI29 | 0.8725  | 0.56237 | 0.97724 |
| SI30 | 0.9349  | 0.52528 | 0.18508 |
| SI31 | 0.81714 | 0.55125 | 0.32059 |
| SI32 | 0.57816 | 0.32663 | 0.33576 |
| SI33 | 0.70144 | 0.36998 | 0.19984 |
| SI34 | 0.73259 | 0.31974 | 0.98923 |
| SI35 | 0.88702 | 0.32322 | 0.98226 |
| SI36 | 0.9412  | 0.36675 | 0.19361 |
| SI37 | 0.92849 | 0.4402  | 0.84565 |
| SI38 | 0.77527 | 0.43588 | 0.47095 |
| SI39 | 0.61957 | 0.43091 | 0.48402 |
| SI40 | 0.57999 | 0.46773 | 0.70083 |
| SI41 | 0.68364 | 0.43322 | 0.85691 |
| SI42 | 0.92118 | 0.67102 | 0.82338 |
| SI43 | 0.80449 | 0.62969 | 0.68942 |
| SI44 | 0.7674  | 0.66221 | 0.46713 |
| SI45 | 0.61231 | 0.66828 | 0.4799  |
| SI46 | 0.56778 | 0.62537 | 0.69826 |
| SI47 | 0.68325 | 0.67616 | 0.82181 |
| SI48 | 0.57493 | 0.93862 | 0.35984 |
| SI49 | 0.69223 | 0.96559 | 0.21342 |
| SI50 | 0.72123 | 0.93679 | 0.99476 |
| SI51 | 0.88063 | 0.93199 | 0.98959 |
| SI52 | 0.93439 | 0.96689 | 0.19808 |
| SI53 | 0.82049 | 0.93962 | 0.34477 |
| SI54 | 0.58119 | 0.17086 | 0.32827 |
| SI55 | 0.69535 | 0.12054 | 0.19137 |
| SI56 | 0.73522 | 0.16396 | 0.97231 |
| SI57 | 0.88929 | 0.16956 | 0.98028 |
| SI58 | 0.93624 | 0.12447 | 0.1932  |
| SI59 | 0.81614 | 0.16265 | 0.32353 |
| SI60 | 0.9251  | 0.05248 | 0.84851 |

|      |         |         |         |
|------|---------|---------|---------|
| SI61 | 0.80437 | 0.02126 | 0.70692 |
| SI62 | 0.78002 | 0.05653 | 0.48481 |
| SI63 | 0.62172 | 0.06431 | 0.48442 |
| SI64 | 0.57214 | 0.02703 | 0.69497 |
| SI65 | 0.68133 | 0.0493  | 0.8479  |
| SI66 | 0.92064 | 0.82397 | 0.83231 |
| SI67 | 0.80568 | 0.86491 | 0.68724 |
| SI68 | 0.7697  | 0.82096 | 0.47084 |
| SI69 | 0.61538 | 0.82186 | 0.49202 |
| SI70 | 0.56782 | 0.87019 | 0.69953 |
| SI71 | 0.68487 | 0.83223 | 0.82912 |
| SI72 | 0.43195 | 0.44376 | 0.64111 |
| SI73 | 0.31114 | 0.47053 | 0.79056 |
| SI74 | 0.29127 | 0.42932 | 0.00743 |
| SI75 | 0.13353 | 0.43082 | 0.00971 |
| SI76 | 0.08148 | 0.47552 | 0.80547 |
| SI77 | 0.1861  | 0.44715 | 0.64868 |
| SI78 | 0.42735 | 0.66823 | 0.65947 |
| SI79 | 0.30452 | 0.62665 | 0.79651 |
| SI80 | 0.27117 | 0.67176 | 0.01056 |
| SI81 | 0.11698 | 0.67224 | 0.00837 |
| SI82 | 0.06884 | 0.63057 | 0.80031 |
| SI83 | 0.18311 | 0.66599 | 0.66172 |
| SI84 | 0.08111 | 0.55271 | 0.14137 |
| SI85 | 0.20444 | 0.52623 | 0.28005 |
| SI86 | 0.22836 | 0.564   | 0.50437 |
| SI87 | 0.38751 | 0.56622 | 0.50418 |
| SI88 | 0.43282 | 0.52632 | 0.28941 |
| SI89 | 0.32918 | 0.5518  | 0.13513 |
| SI90 | 0.08679 | 0.32424 | 0.15951 |
| SI91 | 0.20316 | 0.36743 | 0.30283 |
| SI92 | 0.23553 | 0.32881 | 0.52602 |
| SI93 | 0.38942 | 0.32683 | 0.51175 |
| SI94 | 0.43612 | 0.36872 | 0.29387 |
| SI95 | 0.32271 | 0.32125 | 0.1661  |
| O96  | 0.36216 | 0.06035 | 0.71525 |
| O97  | 0.30456 | 0.06253 | 0.89161 |
| O98  | 0.20119 | 0.04829 | 0.01751 |
| O99  | 0.0984  | 0.06462 | 0.89352 |
| O100 | 0.10626 | 0.05494 | 0.69621 |
| O101 | 0.23313 | 0.03008 | 0.73418 |
| O102 | 0.36288 | 0.82261 | 0.74963 |
| O103 | 0.30827 | 0.84446 | 0.92479 |
| O104 | 0.19144 | 0.85059 | 0.0166  |

|      |         |         |          |
|------|---------|---------|----------|
| O105 | 0.08372 | 0.83043 | 0.90701  |
| O106 | 0.10666 | 0.83171 | 0.71174  |
| O107 | 0.23308 | 0.85131 | 0.76188  |
| O108 | 0.32529 | 0.94534 | 0.79797  |
| O109 | 0.08661 | 0.94608 | 0.80837  |
| O110 | 0.43478 | 0.12454 | 0.57982  |
| O111 | 0.41909 | 0.99274 | 0.56368  |
| O112 | 0.40075 | 0.86027 | 0.56689  |
| O113 | 0.19766 | 0.12822 | 0.60856  |
| O114 | 0.18177 | 0.99948 | 0.55704  |
| O115 | 0.19477 | 0.8654  | 0.57111  |
| O116 | 0.99078 | 0.03806 | 0.78118  |
| O117 | 0.98575 | 0.86069 | 0.78331  |
| O118 | 0.14397 | 0.93861 | 0.22127  |
| O119 | 0.20152 | 0.92574 | 0.39664  |
| O120 | 0.2994  | 0.94286 | 0.53085  |
| O121 | 0.39631 | 0.92527 | 0.39601  |
| O122 | 0.39628 | 0.94382 | 0.19842  |
| O123 | 0.27135 | 0.96998 | 0.24123  |
| O124 | 0.14238 | 0.16501 | 0.24258  |
| O125 | 0.19839 | 0.16368 | 0.41675  |
| O126 | 0.31227 | 0.14586 | 0.51391  |
| O127 | 0.41517 | 0.16943 | 0.39396  |
| O128 | 0.3967  | 0.1485  | 0.20029  |
| O129 | 0.27131 | 0.13393 | 0.25615  |
| O130 | 0.17965 | 0.04818 | 0.32177  |
| O131 | 0.42051 | 0.04566 | 0.32342  |
| O132 | 0.07054 | 0.86838 | 0.096    |
| O133 | 0.08367 | 0.99853 | 0.06516  |
| O134 | 0.1003  | 0.1307  | 0.06144  |
| O135 | 0.30268 | 0.86728 | 0.1205   |
| O136 | 0.31761 | 0.99287 | 0.05734  |
| O137 | 0.3039  | 0.12682 | 0.06214  |
| O138 | 0.50876 | 0.94639 | 0.29142  |
| O139 | 0.51702 | 0.13277 | 0.27878  |
| O140 | 0.64347 | 0.55025 | 0.28187  |
| O141 | 0.67834 | 0.57007 | 0.09342  |
| O142 | 0.79379 | 0.55934 | -0.00004 |
| O143 | 0.91442 | 0.56079 | 0.08061  |
| O144 | 0.89334 | 0.55634 | 0.27873  |
| O145 | 0.76822 | 0.53574 | 0.22747  |
| O146 | 0.64517 | 0.33654 | 0.27179  |
| O147 | 0.70618 | 0.32043 | 0.10341  |
| O148 | 0.80951 | 0.3483  | 0.98243  |



|      |         |         |         |
|------|---------|---------|---------|
| O149 | 0.91844 | 0.32615 | 0.09356 |
| O150 | 0.90753 | 0.33503 | 0.29201 |
| O151 | 0.77266 | 0.37453 | 0.25379 |
| O152 | 0.67732 | 0.44556 | 0.16675 |
| O153 | 0.92109 | 0.44542 | 0.17788 |
| O154 | 0.56847 | 0.62505 | 0.40067 |
| O155 | 0.5801  | 0.49529 | 0.43808 |
| O156 | 0.58627 | 0.36112 | 0.4459  |
| O157 | 0.80004 | 0.62242 | 0.37343 |
| O158 | 0.81331 | 0.49093 | 0.4025  |
| O159 | 0.80984 | 0.36001 | 0.44566 |
| O160 | 0.01364 | 0.54097 | 0.20669 |
| O161 | 0.02269 | 0.36396 | 0.20463 |
| O162 | 0.88725 | 0.42888 | 0.73828 |
| O163 | 0.79328 | 0.44627 | 0.5851  |
| O164 | 0.6967  | 0.43419 | 0.44534 |
| O165 | 0.61566 | 0.43332 | 0.60423 |
| O166 | 0.61178 | 0.43461 | 0.79955 |
| O167 | 0.74674 | 0.43234 | 0.78408 |
| O168 | 0.86597 | 0.67424 | 0.73511 |
| O169 | 0.80675 | 0.6413  | 0.56849 |
| O170 | 0.68911 | 0.64116 | 0.4783  |
| O171 | 0.58238 | 0.66027 | 0.59121 |
| O172 | 0.60615 | 0.66623 | 0.78609 |
| O173 | 0.73254 | 0.65765 | 0.7292  |
| O174 | 0.81511 | 0.553   | 0.72109 |
| O175 | 0.59386 | 0.54829 | 0.69729 |
| O176 | 0.93119 | 0.37072 | 0.90767 |
| O177 | 0.89154 | 0.49729 | 0.90931 |
| O178 | 0.89286 | 0.63079 | 0.9198  |
| O179 | 0.6827  | 0.36495 | 0.92311 |
| O180 | 0.68486 | 0.49886 | 0.92922 |
| O181 | 0.69741 | 0.63197 | 0.92071 |
| O182 | 0.50016 | 0.45448 | 0.70306 |
| O183 | 0.48752 | 0.62991 | 0.71888 |
| O184 | 0.63966 | 0.92944 | 0.28826 |
| O185 | 0.69333 | 0.92587 | 0.10744 |
| O186 | 0.80147 | 0.94919 | 0.99408 |
| O187 | 0.91016 | 0.92365 | 0.10171 |
| O188 | 0.89484 | 0.94269 | 0.29733 |
| O189 | 0.76689 | 0.96254 | 0.26052 |
| O190 | 0.64271 | 0.16849 | 0.24974 |
| O191 | 0.69838 | 0.14524 | 0.07644 |
| O192 | 0.81317 | 0.14069 | 0.97911 |

|      |         |         |         |
|------|---------|---------|---------|
| O193 | 0.9173  | 0.16732 | 0.09406 |
| O194 | 0.89338 | 0.14951 | 0.28885 |
| O195 | 0.76868 | 0.12287 | 0.24348 |
| O196 | 0.66916 | 0.04311 | 0.19678 |
| O197 | 0.921   | 0.04557 | 0.173   |
| O198 | 0.56734 | 0.87208 | 0.42925 |
| O199 | 0.57961 | 0.00421 | 0.43209 |
| O200 | 0.60229 | 0.13555 | 0.43345 |
| O201 | 0.80594 | 0.86349 | 0.38261 |
| O202 | 0.81801 | 0.99168 | 0.43878 |
| O203 | 0.80564 | 0.12732 | 0.43519 |
| O204 | 0.0133  | 0.95415 | 0.21984 |
| O205 | 0.01532 | 0.13612 | 0.21726 |
| O206 | 0.86052 | 0.05687 | 0.77573 |
| O207 | 0.79754 | 0.06276 | 0.60274 |
| O208 | 0.70043 | 0.04811 | 0.46696 |
| O209 | 0.60464 | 0.06934 | 0.6027  |
| O210 | 0.60697 | 0.04793 | 0.79988 |
| O211 | 0.73302 | 0.0209  | 0.76411 |
| O212 | 0.86061 | 0.82456 | 0.75177 |
| O213 | 0.80781 | 0.83356 | 0.57592 |
| O214 | 0.69267 | 0.84659 | 0.48174 |
| O215 | 0.59258 | 0.82189 | 0.60857 |
| O216 | 0.60745 | 0.84902 | 0.80081 |
| O217 | 0.73162 | 0.8562  | 0.73574 |
| O218 | 0.82555 | 0.94408 | 0.68349 |
| O219 | 0.5839  | 0.94778 | 0.67049 |
| O220 | 0.93475 | 0.12337 | 0.90708 |
| O221 | 0.91789 | 0.99268 | 0.93082 |
| O222 | 0.89545 | 0.86131 | 0.93335 |
| O223 | 0.69922 | 0.1257  | 0.87973 |
| O224 | 0.68401 | 0.00188 | 0.94679 |
| O225 | 0.70487 | 0.86995 | 0.93149 |
| O226 | 0.49326 | 0.04353 | 0.70828 |
| O227 | 0.48802 | 0.8616  | 0.71865 |
| O228 | 0.36979 | 0.44379 | 0.71828 |
| O229 | 0.30905 | 0.42347 | 0.88958 |
| O230 | 0.21244 | 0.44528 | 0.02657 |
| O231 | 0.11756 | 0.4306  | 0.89076 |
| O232 | 0.11177 | 0.45946 | 0.695   |
| O233 | 0.23962 | 0.4649  | 0.73491 |
| O234 | 0.3592  | 0.65983 | 0.72317 |
| O235 | 0.30289 | 0.67014 | 0.89888 |
| O236 | 0.19399 | 0.64551 | 0.00749 |

|      |         |         |         |
|------|---------|---------|---------|
| O237 | 0.08944 | 0.67778 | 0.89432 |
| O238 | 0.10593 | 0.65516 | 0.69802 |
| O239 | 0.23128 | 0.62981 | 0.74375 |
| O240 | 0.323   | 0.54883 | 0.82155 |
| O241 | 0.09265 | 0.55488 | 0.82916 |
| O242 | 0.43636 | 0.37181 | 0.58421 |
| O243 | 0.4233  | 0.50243 | 0.55749 |
| O244 | 0.41746 | 0.63578 | 0.5488  |
| O245 | 0.19419 | 0.37023 | 0.61037 |
| O246 | 0.19641 | 0.49586 | 0.55211 |
| O247 | 0.19422 | 0.63061 | 0.55327 |
| O248 | 0.00135 | 0.46346 | 0.80706 |
| O249 | 0.98874 | 0.63425 | 0.78118 |
| O250 | 0.14296 | 0.56042 | 0.21923 |
| O251 | 0.21306 | 0.56542 | 0.38557 |
| O252 | 0.30782 | 0.5632  | 0.52667 |
| O253 | 0.40172 | 0.56523 | 0.38548 |
| O254 | 0.40109 | 0.55864 | 0.18909 |
| O255 | 0.2729  | 0.53281 | 0.21772 |
| O256 | 0.14608 | 0.32687 | 0.24226 |
| O257 | 0.20069 | 0.34129 | 0.41755 |
| O258 | 0.31275 | 0.35471 | 0.52099 |
| O259 | 0.41374 | 0.33184 | 0.39672 |
| O260 | 0.39992 | 0.33169 | 0.19994 |
| O261 | 0.27588 | 0.35346 | 0.25379 |
| O262 | 0.18715 | 0.44751 | 0.29987 |
| O263 | 0.41367 | 0.44712 | 0.2984  |
| O264 | 0.07283 | 0.62079 | 0.07538 |
| O265 | 0.09131 | 0.48952 | 0.06575 |
| O266 | 0.11229 | 0.35838 | 0.05552 |
| O267 | 0.31335 | 0.62335 | 0.08362 |
| O268 | 0.33379 | 0.49146 | 0.05368 |
| O269 | 0.30991 | 0.35826 | 0.05974 |
| O270 | 0.51265 | 0.53663 | 0.27996 |
| O271 | 0.51608 | 0.36241 | 0.27749 |
| O272 | 0.44448 | 0.74689 | 0.64364 |
| O273 | 0.19977 | 0.74528 | 0.65122 |
| O274 | 0.2747  | 0.74784 | 0.05305 |
| O275 | 0.11176 | 0.74679 | 0.0565  |
| O276 | 0.06699 | 0.24703 | 0.13647 |
| O277 | 0.30588 | 0.24243 | 0.15259 |
| O278 | 0.23372 | 0.25025 | 0.55669 |
| O279 | 0.39432 | 0.24918 | 0.5479  |
| O280 | 0.56174 | 0.2479  | 0.35312 |

|                            |         |         |         |
|----------------------------|---------|---------|---------|
| O281                       | 0.79667 | 0.24014 | 0.32798 |
| O282                       | 0.73042 | 0.24322 | 0.9483  |
| O283                       | 0.8923  | 0.24668 | 0.94097 |
| O284                       | 0.93927 | 0.74675 | 0.8596  |
| O285                       | 0.69512 | 0.75358 | 0.85255 |
| O286                       | 0.77367 | 0.7419  | 0.44292 |
| O287                       | 0.60827 | 0.74657 | 0.44711 |
| O288                       | 0.91193 | 0.22995 | 0.45835 |
| O289                       | 0.83938 | 0.20694 | 0.6011  |
| O290                       | 0.88747 | 0.32125 | 0.58349 |
| O291                       | 0.96664 | 0.22577 | 0.63522 |
| O292                       | 0.04813 | 0.26983 | 0.4195  |
| O293                       | 0.02239 | 0.34715 | 0.68752 |
| GA29                       | 0.94674 | 0.38565 | 0.64108 |
| H295                       | 0.95407 | 0.24137 | 0.42575 |
| H296                       | 0.83786 | 0.34243 | 0.50518 |
| H297                       | 0.82468 | 0.17575 | 0.54755 |
| H298                       | 0.98469 | 0.53935 | 0.64171 |
| H299                       | 0.01404 | 0.29821 | 0.68045 |
| H300                       | 0.08985 | 0.54841 | 0.52969 |
| H301                       | 0.08185 | 0.57343 | 0.40389 |
| H302                       | 0.959   | 0.58498 | 0.42604 |
| H303                       | 0.0016  | 0.63086 | 0.52005 |
| H304                       | 0.90689 | 0.56109 | 0.59087 |
| H305                       | 0.97289 | 0.3914  | 0.43115 |
| H306                       | 0.0509  | 0.46498 | 0.35103 |
| H307                       | 0.89228 | 0.45103 | 0.53306 |
| H308                       | 0.09189 | 0.44103 | 0.45903 |
| AL30                       | 0.82369 | 0.32205 | 0.32193 |
| AL31                       | 0.80517 | 0.46751 | 0.70837 |
| P311                       | 0.90683 | 0.24345 | 0.57575 |
| C312                       | 0.95541 | 0.53901 | 0.57212 |
| C313                       | 0.05703 | 0.54573 | 0.46428 |
| C314                       | 0.99149 | 0.57995 | 0.49192 |
| C315                       | 0.98697 | 0.43917 | 0.46636 |
| C316                       | 0.94446 | 0.46845 | 0.534   |
| C317                       | 0.04914 | 0.47163 | 0.43294 |
| C318                       | 0.08303 | 0.25826 | 0.48537 |
| <b>TS<sub>CO+H2O</sub></b> |         |         |         |
| SI2                        | 0.42651 | 0.05487 | 0.64181 |
| SI3                        | 0.3061  | 0.02439 | 0.78354 |
| SI4                        | 0.28162 | 0.05778 | 0.00673 |
| SI5                        | 0.12149 | 0.06004 | 0.00807 |

|      |         |         |         |
|------|---------|---------|---------|
| SI6  | 0.07049 | 0.02613 | 0.79396 |
| SI7  | 0.18045 | 0.05299 | 0.64635 |
| SI8  | 0.42371 | 0.82366 | 0.66843 |
| SI9  | 0.30684 | 0.86631 | 0.80718 |
| SI10 | 0.26954 | 0.8275  | 0.0268  |
| SI11 | 0.11486 | 0.82424 | 0.01679 |
| SI12 | 0.06546 | 0.86761 | 0.80114 |
| SI13 | 0.18366 | 0.82376 | 0.67317 |
| SI14 | 0.07869 | 0.94051 | 0.1494  |
| SI15 | 0.19947 | 0.97067 | 0.29431 |
| SI16 | 0.21957 | 0.93255 | 0.51281 |
| SI17 | 0.37886 | 0.9306  | 0.51294 |
| SI18 | 0.43144 | 0.96593 | 0.30206 |
| SI19 | 0.32171 | 0.94345 | 0.1527  |
| SI20 | 0.08085 | 0.16832 | 0.16323 |
| SI21 | 0.19929 | 0.12703 | 0.30697 |
| SI22 | 0.23606 | 0.17181 | 0.52199 |
| SI23 | 0.39001 | 0.17211 | 0.50762 |
| SI24 | 0.4389  | 0.12417 | 0.2981  |
| SI25 | 0.32073 | 0.16296 | 0.16696 |
| SI26 | 0.57806 | 0.55075 | 0.34995 |
| SI27 | 0.6924  | 0.5241  | 0.1916  |
| SI28 | 0.71348 | 0.56525 | 0.9834  |
| SI29 | 0.873   | 0.56226 | 0.97865 |
| SI30 | 0.93516 | 0.52569 | 0.18642 |
| SI31 | 0.81699 | 0.55153 | 0.32122 |
| SI32 | 0.57916 | 0.32736 | 0.33629 |
| SI33 | 0.70304 | 0.36989 | 0.20001 |
| SI34 | 0.73315 | 0.32006 | 0.98977 |
| SI35 | 0.88735 | 0.32261 | 0.98571 |
| SI36 | 0.94167 | 0.36717 | 0.19604 |
| SI37 | 0.92758 | 0.43814 | 0.8483  |
| SI38 | 0.7761  | 0.43642 | 0.47509 |
| SI39 | 0.61927 | 0.43113 | 0.48749 |
| SI40 | 0.57747 | 0.46741 | 0.70432 |
| SI41 | 0.68071 | 0.43343 | 0.85836 |
| SI42 | 0.92154 | 0.67026 | 0.8229  |
| SI43 | 0.80439 | 0.62899 | 0.69095 |
| SI44 | 0.76818 | 0.66163 | 0.46881 |
| SI45 | 0.61268 | 0.6679  | 0.47941 |
| SI46 | 0.56752 | 0.62512 | 0.69813 |
| SI47 | 0.68314 | 0.6767  | 0.82126 |
| SI48 | 0.57546 | 0.93885 | 0.35937 |
| SI49 | 0.69336 | 0.9667  | 0.2135  |

|      |         |         |         |
|------|---------|---------|---------|
| SI50 | 0.7214  | 0.93728 | 0.99439 |
| SI51 | 0.88106 | 0.93136 | 0.98882 |
| SI52 | 0.93453 | 0.96629 | 0.19819 |
| SI53 | 0.82111 | 0.93883 | 0.34469 |
| SI54 | 0.58246 | 0.1715  | 0.32831 |
| SI55 | 0.6968  | 0.12214 | 0.19118 |
| SI56 | 0.7354  | 0.1646  | 0.97161 |
| SI57 | 0.88913 | 0.16899 | 0.98286 |
| SI58 | 0.93622 | 0.12395 | 0.1957  |
| SI59 | 0.8173  | 0.16304 | 0.32579 |
| SI60 | 0.92554 | 0.05292 | 0.8494  |
| SI61 | 0.8053  | 0.0217  | 0.70844 |
| SI62 | 0.77995 | 0.05527 | 0.48489 |
| SI63 | 0.62178 | 0.06396 | 0.48438 |
| SI64 | 0.57207 | 0.02712 | 0.69482 |
| SI65 | 0.68151 | 0.04996 | 0.84766 |
| SI66 | 0.92093 | 0.82304 | 0.83227 |
| SI67 | 0.80616 | 0.86548 | 0.68905 |
| SI68 | 0.77036 | 0.82113 | 0.47215 |
| SI69 | 0.61564 | 0.82161 | 0.49179 |
| SI70 | 0.56754 | 0.87032 | 0.69883 |
| SI71 | 0.68448 | 0.83275 | 0.82916 |
| SI72 | 0.43093 | 0.44347 | 0.64116 |
| SI73 | 0.31073 | 0.47059 | 0.79068 |
| SI74 | 0.29104 | 0.42994 | 0.00754 |
| SI75 | 0.1331  | 0.43054 | 0.01005 |
| SI76 | 0.07957 | 0.47349 | 0.8055  |
| SI77 | 0.18584 | 0.44648 | 0.65064 |
| SI78 | 0.42712 | 0.66842 | 0.65893 |
| SI79 | 0.30525 | 0.62674 | 0.79715 |
| SI80 | 0.27163 | 0.6717  | 0.01124 |
| SI81 | 0.11744 | 0.67169 | 0.00733 |
| SI82 | 0.06865 | 0.62895 | 0.7994  |
| SI83 | 0.18365 | 0.66561 | 0.66245 |
| SI84 | 0.08113 | 0.55257 | 0.14157 |
| SI85 | 0.20485 | 0.5256  | 0.27959 |
| SI86 | 0.22852 | 0.56276 | 0.50518 |
| SI87 | 0.38782 | 0.5655  | 0.50364 |
| SI88 | 0.43377 | 0.5259  | 0.28931 |
| SI89 | 0.32976 | 0.55217 | 0.13611 |
| SI90 | 0.08712 | 0.32343 | 0.16027 |
| SI91 | 0.20357 | 0.36624 | 0.30284 |
| SI92 | 0.23614 | 0.3287  | 0.52608 |
| SI93 | 0.39    | 0.32661 | 0.51123 |

|      |         |         |         |
|------|---------|---------|---------|
| SI94 | 0.43693 | 0.36857 | 0.29359 |
| SI95 | 0.32327 | 0.32112 | 0.16611 |
| O96  | 0.36207 | 0.06081 | 0.71483 |
| O97  | 0.30337 | 0.06253 | 0.89049 |
| O98  | 0.20143 | 0.04894 | 0.01933 |
| O99  | 0.10052 | 0.06405 | 0.89169 |
| O100 | 0.10626 | 0.05521 | 0.69426 |
| O101 | 0.23311 | 0.02975 | 0.73194 |
| O102 | 0.36263 | 0.82269 | 0.74818 |
| O103 | 0.30849 | 0.84435 | 0.92358 |
| O104 | 0.19188 | 0.85077 | 0.01565 |
| O105 | 0.08433 | 0.83091 | 0.90551 |
| O106 | 0.10659 | 0.83181 | 0.71025 |
| O107 | 0.23296 | 0.85142 | 0.76093 |
| O108 | 0.32521 | 0.9455  | 0.79702 |
| O109 | 0.08603 | 0.94625 | 0.80578 |
| O110 | 0.43507 | 0.12443 | 0.57914 |
| O111 | 0.4189  | 0.99279 | 0.56357 |
| O112 | 0.40062 | 0.86039 | 0.56551 |
| O113 | 0.19794 | 0.12763 | 0.60564 |
| O114 | 0.18131 | 0.99865 | 0.55547 |
| O115 | 0.19532 | 0.8647  | 0.56969 |
| O116 | 0.99121 | 0.03956 | 0.78145 |
| O117 | 0.98562 | 0.86005 | 0.78229 |
| O118 | 0.14433 | 0.93939 | 0.21968 |
| O119 | 0.20151 | 0.92505 | 0.39502 |
| O120 | 0.29938 | 0.94297 | 0.52893 |
| O121 | 0.39689 | 0.92594 | 0.39499 |
| O122 | 0.39685 | 0.94426 | 0.19733 |
| O123 | 0.27188 | 0.96976 | 0.24023 |
| O124 | 0.14326 | 0.16381 | 0.23977 |
| O125 | 0.199   | 0.16458 | 0.41447 |
| O126 | 0.31284 | 0.14579 | 0.51169 |
| O127 | 0.41642 | 0.16972 | 0.39322 |
| O128 | 0.3978  | 0.14899 | 0.19963 |
| O129 | 0.27233 | 0.13395 | 0.25493 |
| O130 | 0.18108 | 0.04811 | 0.32194 |
| O131 | 0.42232 | 0.04601 | 0.32214 |
| O132 | 0.07116 | 0.86789 | 0.09525 |
| O133 | 0.08369 | 0.99788 | 0.06297 |
| O134 | 0.09905 | 0.1302  | 0.05966 |
| O135 | 0.30339 | 0.86726 | 0.11945 |
| O136 | 0.31789 | 0.99262 | 0.05594 |
| O137 | 0.30532 | 0.12657 | 0.06114 |

|      |         |         |         |
|------|---------|---------|---------|
| O138 | 0.50945 | 0.94583 | 0.29027 |
| O139 | 0.51833 | 0.13371 | 0.27808 |
| O140 | 0.6446  | 0.54819 | 0.28237 |
| O141 | 0.67875 | 0.57055 | 0.09354 |
| O142 | 0.79383 | 0.55949 | 0.99844 |
| O143 | 0.91335 | 0.56288 | 0.08378 |
| O144 | 0.89395 | 0.55517 | 0.28163 |
| O145 | 0.76934 | 0.53688 | 0.22629 |
| O146 | 0.64627 | 0.33799 | 0.27277 |
| O147 | 0.70731 | 0.31952 | 0.10436 |
| O148 | 0.81006 | 0.34868 | 0.98269 |
| O149 | 0.91686 | 0.32493 | 0.09841 |
| O150 | 0.909   | 0.33795 | 0.29675 |
| O151 | 0.77422 | 0.37422 | 0.25385 |
| O152 | 0.6797  | 0.44538 | 0.16499 |
| O153 | 0.92278 | 0.44579 | 0.17625 |
| O154 | 0.56967 | 0.62504 | 0.3987  |
| O155 | 0.58083 | 0.49592 | 0.4403  |
| O156 | 0.58639 | 0.36185 | 0.44642 |
| O157 | 0.80047 | 0.6231  | 0.37355 |
| O158 | 0.81079 | 0.4913  | 0.40245 |
| O159 | 0.80924 | 0.36042 | 0.44822 |
| O160 | 0.01406 | 0.54177 | 0.2082  |
| O161 | 0.02334 | 0.36337 | 0.20547 |
| O162 | 0.88218 | 0.42648 | 0.74619 |
| O163 | 0.79617 | 0.44791 | 0.58796 |
| O164 | 0.69694 | 0.43454 | 0.45286 |
| O165 | 0.61216 | 0.43235 | 0.60751 |
| O166 | 0.60749 | 0.43435 | 0.80447 |
| O167 | 0.74071 | 0.43268 | 0.78038 |
| O168 | 0.86611 | 0.67397 | 0.73501 |
| O169 | 0.80697 | 0.63811 | 0.56944 |
| O170 | 0.68962 | 0.64144 | 0.47884 |
| O171 | 0.58192 | 0.6586  | 0.59002 |
| O172 | 0.60613 | 0.66686 | 0.78479 |
| O173 | 0.73256 | 0.65875 | 0.72855 |
| O174 | 0.81381 | 0.5532  | 0.72756 |
| O175 | 0.5927  | 0.54775 | 0.69975 |
| O176 | 0.93311 | 0.36969 | 0.91282 |
| O177 | 0.89385 | 0.49617 | 0.91464 |
| O178 | 0.89398 | 0.62996 | 0.91966 |
| O179 | 0.68242 | 0.36565 | 0.92563 |
| O180 | 0.68389 | 0.49952 | 0.92958 |
| O181 | 0.6971  | 0.63235 | 0.9201  |



|      |         |         |         |
|------|---------|---------|---------|
| O182 | 0.4974  | 0.45514 | 0.70652 |
| O183 | 0.48722 | 0.63031 | 0.71846 |
| O184 | 0.64058 | 0.93084 | 0.28835 |
| O185 | 0.69402 | 0.92707 | 0.10746 |
| O186 | 0.80183 | 0.94836 | 0.99224 |
| O187 | 0.90996 | 0.92376 | 0.10139 |
| O188 | 0.89561 | 0.94107 | 0.29751 |
| O189 | 0.76807 | 0.96267 | 0.26022 |
| O190 | 0.64402 | 0.16969 | 0.24995 |
| O191 | 0.69856 | 0.14647 | 0.07603 |
| O192 | 0.81302 | 0.14021 | 0.97861 |
| O193 | 0.91547 | 0.16693 | 0.09756 |
| O194 | 0.89481 | 0.14844 | 0.29315 |
| O195 | 0.7703  | 0.12563 | 0.24239 |
| O196 | 0.67119 | 0.04449 | 0.19743 |
| O197 | 0.92084 | 0.04511 | 0.17496 |
| O198 | 0.56828 | 0.872   | 0.42819 |
| O199 | 0.57881 | 0.00444 | 0.4319  |
| O200 | 0.60355 | 0.1354  | 0.43294 |
| O201 | 0.80585 | 0.86273 | 0.38221 |
| O202 | 0.81856 | 0.99088 | 0.43857 |
| O203 | 0.80419 | 0.12647 | 0.43565 |
| O204 | 0.01364 | 0.9537  | 0.21866 |
| O205 | 0.01569 | 0.13549 | 0.21723 |
| O206 | 0.86092 | 0.05866 | 0.77674 |
| O207 | 0.7982  | 0.06088 | 0.60254 |
| O208 | 0.70026 | 0.04609 | 0.46814 |
| O209 | 0.60419 | 0.06961 | 0.60247 |
| O210 | 0.60712 | 0.04781 | 0.79963 |
| O211 | 0.73343 | 0.02182 | 0.76414 |
| O212 | 0.86022 | 0.82323 | 0.75276 |
| O213 | 0.80847 | 0.83645 | 0.5764  |
| O214 | 0.69304 | 0.84587 | 0.48239 |
| O215 | 0.59224 | 0.82186 | 0.60808 |
| O216 | 0.60712 | 0.8493  | 0.80015 |
| O217 | 0.73172 | 0.85689 | 0.73638 |
| O218 | 0.82742 | 0.94428 | 0.68891 |
| O219 | 0.58366 | 0.94791 | 0.66977 |
| O220 | 0.93548 | 0.12251 | 0.91122 |
| O221 | 0.9185  | 0.99155 | 0.92923 |
| O222 | 0.89657 | 0.86037 | 0.93379 |
| O223 | 0.69879 | 0.12652 | 0.87934 |
| O224 | 0.68467 | 0.00273 | 0.94672 |
| O225 | 0.70355 | 0.87049 | 0.93187 |

|      |          |         |         |
|------|----------|---------|---------|
| O226 | 0.49313  | 0.04354 | 0.70836 |
| O227 | 0.48769  | 0.86171 | 0.71766 |
| O228 | 0.36706  | 0.44302 | 0.71521 |
| O229 | 0.30978  | 0.42375 | 0.88998 |
| O230 | 0.21208  | 0.44608 | 0.02504 |
| O231 | 0.11578  | 0.42917 | 0.89161 |
| O232 | 0.1112   | 0.45712 | 0.69592 |
| O233 | 0.23825  | 0.46576 | 0.73751 |
| O234 | 0.35913  | 0.66053 | 0.72324 |
| O235 | 0.30436  | 0.6693  | 0.90029 |
| O236 | 0.19456  | 0.64518 | 0.00713 |
| O237 | 0.09005  | 0.67607 | 0.89312 |
| O238 | 0.10639  | 0.65297 | 0.69706 |
| O239 | 0.23166  | 0.6303  | 0.74538 |
| O240 | 0.32401  | 0.54878 | 0.82064 |
| O241 | 0.09104  | 0.55292 | 0.82844 |
| O242 | 0.43652  | 0.3716  | 0.58429 |
| O243 | 0.42389  | 0.50207 | 0.55706 |
| O244 | 0.41626  | 0.63546 | 0.54875 |
| O245 | 0.1958   | 0.36988 | 0.6119  |
| O246 | 0.19463  | 0.49586 | 0.55406 |
| O247 | 0.19564  | 0.63007 | 0.55399 |
| O248 | -0.00001 | 0.46002 | 0.80585 |
| O249 | 0.98884  | 0.63368 | 0.77939 |
| O250 | 0.14362  | 0.56003 | 0.21878 |
| O251 | 0.21079  | 0.56342 | 0.38689 |
| O252 | 0.30796  | 0.56048 | 0.52523 |
| O253 | 0.40245  | 0.56507 | 0.38509 |
| O254 | 0.40213  | 0.5583  | 0.18883 |
| O255 | 0.2742   | 0.53306 | 0.22014 |
| O256 | 0.14641  | 0.32515 | 0.24343 |
| O257 | 0.20015  | 0.34234 | 0.41862 |
| O258 | 0.31324  | 0.35453 | 0.51953 |
| O259 | 0.41464  | 0.33162 | 0.39643 |
| O260 | 0.40049  | 0.33169 | 0.19963 |
| O261 | 0.27655  | 0.35205 | 0.25521 |
| O262 | 0.1873   | 0.44651 | 0.2975  |
| O263 | 0.41396  | 0.44685 | 0.29826 |
| O264 | 0.07346  | 0.62062 | 0.07534 |
| O265 | 0.0908   | 0.48913 | 0.06631 |
| O266 | 0.11359  | 0.35807 | 0.05725 |
| O267 | 0.31332  | 0.62403 | 0.08613 |
| O268 | 0.33315  | 0.49235 | 0.05383 |
| O269 | 0.30948  | 0.35923 | 0.06091 |

|      |         |         |         |
|------|---------|---------|---------|
| O270 | 0.51366 | 0.53552 | 0.28047 |
| O271 | 0.51685 | 0.36242 | 0.27721 |
| O272 | 0.44413 | 0.74699 | 0.64204 |
| O273 | 0.19928 | 0.74496 | 0.65115 |
| O274 | 0.27477 | 0.74803 | 0.05255 |
| O275 | 0.11219 | 0.74658 | 0.05414 |
| O276 | 0.06718 | 0.24645 | 0.13598 |
| O277 | 0.30672 | 0.2424  | 0.15088 |
| O278 | 0.23422 | 0.25    | 0.55575 |
| O279 | 0.39455 | 0.249   | 0.54747 |
| O280 | 0.56311 | 0.2485  | 0.35373 |
| O281 | 0.80003 | 0.24092 | 0.33213 |
| O282 | 0.73134 | 0.24387 | 0.9473  |
| O283 | 0.8927  | 0.24615 | 0.9442  |
| O284 | 0.9401  | 0.74592 | 0.85919 |
| O285 | 0.69476 | 0.75409 | 0.85254 |
| O286 | 0.77544 | 0.74164 | 0.44768 |
| O287 | 0.60818 | 0.74628 | 0.44729 |
| O288 | 0.9114  | 0.22482 | 0.47285 |
| O289 | 0.83836 | 0.19859 | 0.61412 |
| O290 | 0.87545 | 0.31643 | 0.5926  |
| O291 | 0.96232 | 0.23035 | 0.65205 |
| O292 | 0.0486  | 0.25825 | 0.41827 |
| O293 | 0.01608 | 0.35755 | 0.64892 |
| GA29 | 0.93018 | 0.39253 | 0.62754 |
| H295 | 0.95453 | 0.23589 | 0.44319 |
| H296 | 0.83344 | 0.33895 | 0.51018 |
| H297 | 0.82294 | 0.17161 | 0.55655 |
| H298 | 0.97826 | 0.53229 | 0.63701 |
| H299 | 1.01201 | 0.30792 | 0.65441 |
| H300 | 0.08942 | 0.56012 | 0.5342  |
| H301 | 0.08212 | 0.58152 | 0.4092  |
| H302 | 0.95792 | 0.58547 | 0.42411 |
| H303 | 0.99136 | 0.63025 | 0.52706 |
| H304 | 0.90097 | 0.55034 | 0.58126 |
| H305 | 1.00477 | 0.393   | 0.42179 |
| H306 | 0.10397 | 0.46204 | 0.40836 |
| H307 | 0.90689 | 0.45815 | 0.46633 |
| H308 | 0.03786 | 0.40224 | 0.53858 |
| AL30 | 0.82511 | 0.32342 | 0.32508 |
| AL31 | 0.80312 | 0.4679  | 0.71237 |
| P311 | 0.90229 | 0.24133 | 0.5893  |
| C312 | 0.95145 | 0.53198 | 0.56503 |
| C313 | 0.05614 | 0.55327 | 0.4685  |

|                                                       |         |         |         |
|-------------------------------------------------------|---------|---------|---------|
| C314                                                  | 0.98673 | 0.58004 | 0.49352 |
| C315                                                  | 0.01028 | 0.43524 | 0.47502 |
| C316                                                  | 0.94648 | 0.46073 | 0.52248 |
| C317                                                  | 0.05962 | 0.48146 | 0.44631 |
| C318                                                  | 0.0837  | 0.25276 | 0.48557 |
| <b>C<sub>6</sub>H<sub>9</sub>Ga-H<sub>2</sub>O+CO</b> |         |         |         |
| SI2                                                   | 0.42674 | 0.05479 | 0.64182 |
| SI3                                                   | 0.30613 | 0.02452 | 0.78294 |
| SI4                                                   | 0.28194 | 0.05779 | 0.00652 |
| SI5                                                   | 0.12171 | 0.06003 | 0.00743 |
| SI6                                                   | 0.07085 | 0.02652 | 0.79318 |
| SI7                                                   | 0.18062 | 0.05289 | 0.64514 |
| SI8                                                   | 0.42356 | 0.82371 | 0.66761 |
| SI9                                                   | 0.30696 | 0.86663 | 0.80673 |
| SI10                                                  | 0.26991 | 0.8277  | 0.02621 |
| SI11                                                  | 0.11542 | 0.82425 | 0.01564 |
| SI12                                                  | 0.06561 | 0.86765 | 0.79989 |
| SI13                                                  | 0.18417 | 0.82411 | 0.67277 |
| SI14                                                  | 0.07926 | 0.9403  | 0.14819 |
| SI15                                                  | 0.20002 | 0.97057 | 0.29362 |
| SI16                                                  | 0.21984 | 0.93243 | 0.51181 |
| SI17                                                  | 0.37915 | 0.93076 | 0.51209 |
| SI18                                                  | 0.43217 | 0.96602 | 0.3012  |
| SI19                                                  | 0.32219 | 0.94326 | 0.1522  |
| SI20                                                  | 0.08098 | 0.16812 | 0.16253 |
| SI21                                                  | 0.20023 | 0.12689 | 0.30558 |
| SI22                                                  | 0.23684 | 0.17153 | 0.52041 |
| SI23                                                  | 0.3909  | 0.17203 | 0.50727 |
| SI24                                                  | 0.44001 | 0.12427 | 0.29774 |
| SI25                                                  | 0.32204 | 0.16293 | 0.16602 |
| SI26                                                  | 0.57817 | 0.5514  | 0.34871 |
| SI27                                                  | 0.69196 | 0.52444 | 0.18965 |
| SI28                                                  | 0.7138  | 0.56466 | 0.98135 |
| SI29                                                  | 0.87293 | 0.56115 | 0.97731 |
| SI30                                                  | 0.93581 | 0.5257  | 0.18646 |
| SI31                                                  | 0.81663 | 0.55289 | 0.31868 |
| SI32                                                  | 0.57949 | 0.32764 | 0.336   |
| SI33                                                  | 0.70216 | 0.36993 | 0.19759 |
| SI34                                                  | 0.73295 | 0.31972 | 0.98848 |
| SI35                                                  | 0.88742 | 0.32267 | 0.98588 |
| SI36                                                  | 0.94285 | 0.36695 | 0.197   |
| SI37                                                  | 0.92692 | 0.43759 | 0.84627 |
| SI38                                                  | 0.77638 | 0.43799 | 0.47333 |

|      |         |         |         |
|------|---------|---------|---------|
| SI39 | 0.6185  | 0.43207 | 0.48768 |
| SI40 | 0.57561 | 0.46737 | 0.70509 |
| SI41 | 0.68134 | 0.43282 | 0.85501 |
| SI42 | 0.92237 | 0.66907 | 0.82185 |
| SI43 | 0.80487 | 0.62902 | 0.68945 |
| SI44 | 0.76812 | 0.66194 | 0.46806 |
| SI45 | 0.61268 | 0.66805 | 0.4789  |
| SI46 | 0.56709 | 0.62524 | 0.69767 |
| SI47 | 0.68366 | 0.67676 | 0.81974 |
| SI48 | 0.57594 | 0.93899 | 0.35917 |
| SI49 | 0.69425 | 0.96714 | 0.21428 |
| SI50 | 0.72173 | 0.93691 | 0.99445 |
| SI51 | 0.88173 | 0.93049 | 0.98834 |
| SI52 | 0.93505 | 0.96632 | 0.19823 |
| SI53 | 0.82205 | 0.93877 | 0.3451  |
| SI54 | 0.58337 | 0.17185 | 0.32883 |
| SI55 | 0.6973  | 0.12276 | 0.19153 |
| SI56 | 0.73549 | 0.16422 | 0.9717  |
| SI57 | 0.889   | 0.16879 | 0.9847  |
| SI58 | 0.93647 | 0.1241  | 0.19734 |
| SI59 | 0.81774 | 0.16289 | 0.32734 |
| SI60 | 0.92591 | 0.05306 | 0.85035 |
| SI61 | 0.80607 | 0.02147 | 0.70957 |
| SI62 | 0.78041 | 0.05467 | 0.48592 |
| SI63 | 0.62221 | 0.06378 | 0.48469 |
| SI64 | 0.57216 | 0.02691 | 0.69496 |
| SI65 | 0.68183 | 0.04971 | 0.84766 |
| SI66 | 0.92164 | 0.822   | 0.83246 |
| SI67 | 0.80644 | 0.86532 | 0.69075 |
| SI68 | 0.77059 | 0.82153 | 0.47322 |
| SI69 | 0.6159  | 0.82183 | 0.49188 |
| SI70 | 0.56742 | 0.87018 | 0.69874 |
| SI71 | 0.68413 | 0.83257 | 0.82988 |
| SI72 | 0.4299  | 0.44332 | 0.64218 |
| SI73 | 0.30936 | 0.4701  | 0.79123 |
| SI74 | 0.29117 | 0.43099 | 0.00834 |
| SI75 | 0.13327 | 0.43117 | 0.01195 |
| SI76 | 0.07932 | 0.47243 | 0.80598 |
| SI77 | 0.18501 | 0.4448  | 0.65268 |
| SI78 | 0.42677 | 0.66854 | 0.65857 |
| SI79 | 0.30525 | 0.62673 | 0.79718 |
| SI80 | 0.27238 | 0.67182 | 0.01097 |
| SI81 | 0.11825 | 0.67112 | 0.00645 |
| SI82 | 0.06963 | 0.62837 | 0.79686 |

|      |         |         |         |
|------|---------|---------|---------|
| SI83 | 0.18458 | 0.66627 | 0.6621  |
| SI84 | 0.08163 | 0.55313 | 0.14327 |
| SI85 | 0.20508 | 0.52507 | 0.28054 |
| SI86 | 0.22843 | 0.56201 | 0.5072  |
| SI87 | 0.38788 | 0.56484 | 0.50413 |
| SI88 | 0.43406 | 0.52616 | 0.2892  |
| SI89 | 0.32981 | 0.55308 | 0.13735 |
| SI90 | 0.08822 | 0.32291 | 0.16129 |
| SI91 | 0.20391 | 0.36534 | 0.30339 |
| SI92 | 0.23697 | 0.32846 | 0.52578 |
| SI93 | 0.39097 | 0.32656 | 0.51115 |
| SI94 | 0.43746 | 0.36873 | 0.2931  |
| SI95 | 0.32343 | 0.32085 | 0.16675 |
| O96  | 0.36223 | 0.06114 | 0.71463 |
| O97  | 0.30285 | 0.06247 | 0.88994 |
| O98  | 0.20169 | 0.05038 | 0.02064 |
| O99  | 0.10188 | 0.06399 | 0.89056 |
| O100 | 0.10643 | 0.05578 | 0.6933  |
| O101 | 0.23328 | 0.02992 | 0.73082 |
| O102 | 0.36244 | 0.82289 | 0.74728 |
| O103 | 0.30897 | 0.84475 | 0.92312 |
| O104 | 0.19231 | 0.85128 | 0.01506 |
| O105 | 0.08492 | 0.83138 | 0.90437 |
| O106 | 0.10688 | 0.83228 | 0.70889 |
| O107 | 0.23285 | 0.85236 | 0.761   |
| O108 | 0.3256  | 0.94578 | 0.79634 |
| O109 | 0.08543 | 0.94652 | 0.80422 |
| O110 | 0.43566 | 0.12428 | 0.57908 |
| O111 | 0.41909 | 0.99277 | 0.56351 |
| O112 | 0.40058 | 0.86046 | 0.56462 |
| O113 | 0.19817 | 0.12735 | 0.60357 |
| O114 | 0.18118 | 0.99826 | 0.55477 |
| O115 | 0.19618 | 0.86465 | 0.56906 |
| O116 | 0.99161 | 0.04101 | 0.78185 |
| O117 | 0.98578 | 0.85933 | 0.78141 |
| O118 | 0.14499 | 0.93988 | 0.21827 |
| O119 | 0.20149 | 0.92476 | 0.39414 |
| O120 | 0.29965 | 0.94346 | 0.52727 |
| O121 | 0.39769 | 0.92621 | 0.39429 |
| O122 | 0.39747 | 0.94457 | 0.19642 |
| O123 | 0.2726  | 0.96948 | 0.24006 |
| O124 | 0.14413 | 0.16272 | 0.23746 |
| O125 | 0.19982 | 0.16493 | 0.41281 |
| O126 | 0.31367 | 0.14571 | 0.5108  |

|      |         |         |         |
|------|---------|---------|---------|
| O127 | 0.4176  | 0.16964 | 0.39306 |
| O128 | 0.39906 | 0.14931 | 0.19938 |
| O129 | 0.27333 | 0.134   | 0.25375 |
| O130 | 0.18221 | 0.04805 | 0.32184 |
| O131 | 0.42336 | 0.04611 | 0.32139 |
| O132 | 0.07162 | 0.86749 | 0.09467 |
| O133 | 0.08421 | 0.99716 | 0.06097 |
| O134 | 0.09741 | 0.12967 | 0.05856 |
| O135 | 0.30401 | 0.86704 | 0.11911 |
| O136 | 0.31768 | 0.99215 | 0.05516 |
| O137 | 0.30726 | 0.1261  | 0.0604  |
| O138 | 0.5102  | 0.94581 | 0.28946 |
| O139 | 0.51953 | 0.13388 | 0.2782  |
| O140 | 0.64454 | 0.54869 | 0.28074 |
| O141 | 0.6779  | 0.5699  | 0.0907  |
| O142 | 0.79393 | 0.55954 | -0.0014 |
| O143 | 0.91434 | 0.5599  | 0.0811  |
| O144 | 0.89306 | 0.55705 | 0.27855 |
| O145 | 0.76881 | 0.53754 | 0.22407 |
| O146 | 0.64687 | 0.33824 | 0.27293 |
| O147 | 0.70465 | 0.31958 | 0.10184 |
| O148 | 0.80994 | 0.34829 | 0.98408 |
| O149 | 0.91819 | 0.32636 | 0.09743 |
| O150 | 0.90917 | 0.3352  | 0.29567 |
| O151 | 0.77439 | 0.37332 | 0.24861 |
| O152 | 0.67914 | 0.44557 | 0.1638  |
| O153 | 0.92338 | 0.44555 | 0.1804  |
| O154 | 0.57002 | 0.62579 | 0.39713 |
| O155 | 0.5809  | 0.49682 | 0.43941 |
| O156 | 0.58668 | 0.36258 | 0.44569 |
| O157 | 0.79945 | 0.62413 | 0.37153 |
| O158 | 0.81023 | 0.49241 | 0.39982 |
| O159 | 0.80783 | 0.36147 | 0.44385 |
| O160 | 0.01394 | 0.54345 | 0.20794 |
| O161 | 0.02422 | 0.36257 | 0.20567 |
| O162 | 0.8829  | 0.4258  | 0.74245 |
| O163 | 0.80057 | 0.44716 | 0.58506 |
| O164 | 0.69681 | 0.43625 | 0.45614 |
| O165 | 0.60916 | 0.43257 | 0.60723 |
| O166 | 0.60735 | 0.43397 | 0.80379 |
| O167 | 0.7404  | 0.43174 | 0.7751  |
| O168 | 0.86719 | 0.67305 | 0.73359 |
| O169 | 0.80729 | 0.63775 | 0.56796 |
| O170 | 0.68962 | 0.64166 | 0.47893 |

|      |         |         |         |
|------|---------|---------|---------|
| O171 | 0.58135 | 0.65791 | 0.58898 |
| O172 | 0.60669 | 0.66708 | 0.78314 |
| O173 | 0.73345 | 0.66002 | 0.727   |
| O174 | 0.8127  | 0.55306 | 0.72634 |
| O175 | 0.59134 | 0.54758 | 0.70042 |
| O176 | 0.93206 | 0.36896 | 0.91022 |
| O177 | 0.89147 | 0.4951  | 0.91123 |
| O178 | 0.89427 | 0.62877 | 0.9183  |
| O179 | 0.68353 | 0.36487 | 0.92174 |
| O180 | 0.68574 | 0.49858 | 0.92662 |
| O181 | 0.69762 | 0.63155 | 0.91761 |
| O182 | 0.49549 | 0.45492 | 0.71007 |
| O183 | 0.48701 | 0.63111 | 0.71881 |
| O184 | 0.64141 | 0.93112 | 0.28877 |
| O185 | 0.69504 | 0.92789 | 0.10805 |
| O186 | 0.80229 | 0.94666 | 0.99028 |
| O187 | 0.90992 | 0.92415 | 0.10144 |
| O188 | 0.89649 | 0.94063 | 0.29769 |
| O189 | 0.76901 | 0.96305 | 0.26086 |
| O190 | 0.64498 | 0.17066 | 0.25045 |
| O191 | 0.69842 | 0.14646 | 0.0761  |
| O192 | 0.81301 | 0.13969 | 0.97959 |
| O193 | 0.91465 | 0.16728 | 0.09979 |
| O194 | 0.89533 | 0.14832 | 0.29543 |
| O195 | 0.77107 | 0.12738 | 0.24204 |
| O196 | 0.67218 | 0.04509 | 0.19916 |
| O197 | 0.92102 | 0.04531 | 0.17637 |
| O198 | 0.56865 | 0.87225 | 0.42813 |
| O199 | 0.57904 | 0.00471 | 0.43154 |
| O200 | 0.60493 | 0.13543 | 0.43306 |
| O201 | 0.80632 | 0.86298 | 0.38326 |
| O202 | 0.81974 | 0.99113 | 0.43872 |
| O203 | 0.80347 | 0.12645 | 0.43693 |
| O204 | 0.01428 | 0.9539  | 0.21753 |
| O205 | 0.01591 | 0.13599 | 0.21788 |
| O206 | 0.86125 | 0.05938 | 0.77769 |
| O207 | 0.79931 | 0.06028 | 0.60326 |
| O208 | 0.70071 | 0.04514 | 0.4697  |
| O209 | 0.60411 | 0.06958 | 0.6026  |
| O210 | 0.60743 | 0.04742 | 0.79975 |
| O211 | 0.73384 | 0.0219  | 0.76409 |
| O212 | 0.8601  | 0.82245 | 0.75424 |
| O213 | 0.80843 | 0.83703 | 0.57765 |
| O214 | 0.69327 | 0.84636 | 0.48292 |



|      |          |         |         |
|------|----------|---------|---------|
| O215 | 0.59227  | 0.8218  | 0.60803 |
| O216 | 0.60689  | 0.84899 | 0.80006 |
| O217 | 0.73191  | 0.85736 | 0.73804 |
| O218 | 0.82846  | 0.94401 | 0.6915  |
| O219 | 0.58383  | 0.94775 | 0.66982 |
| O220 | 0.93565  | 0.12206 | 0.91383 |
| O221 | 0.91897  | 0.99071 | 0.92839 |
| O222 | 0.89835  | 0.85927 | 0.93471 |
| O223 | 0.69892  | 0.12633 | 0.87931 |
| O224 | 0.68552  | 0.00269 | 0.94683 |
| O225 | 0.70211  | 0.8701  | 0.93325 |
| O226 | 0.49325  | 0.04333 | 0.70867 |
| O227 | 0.48752  | 0.86176 | 0.71703 |
| O228 | 0.36417  | 0.44266 | 0.71282 |
| O229 | 0.31128  | 0.42386 | 0.89126 |
| O230 | 0.21218  | 0.4482  | 0.02278 |
| O231 | 0.11357  | 0.42885 | 0.89424 |
| O232 | 0.10873  | 0.447   | 0.6979  |
| O233 | 0.23514  | 0.46408 | 0.74304 |
| O234 | 0.35881  | 0.66055 | 0.72277 |
| O235 | 0.30607  | 0.6689  | 0.90068 |
| O236 | 0.19549  | 0.6451  | 0.0056  |
| O237 | 0.09029  | 0.67391 | 0.89251 |
| O238 | 0.10701  | 0.65475 | 0.69592 |
| O239 | 0.2313   | 0.63113 | 0.747   |
| O240 | 0.3233   | 0.54842 | 0.81934 |
| O241 | 0.09375  | 0.5518  | 0.82086 |
| O242 | 0.43679  | 0.37151 | 0.58525 |
| O243 | 0.42495  | 0.502   | 0.55794 |
| O244 | 0.41606  | 0.63513 | 0.54875 |
| O245 | 0.19723  | 0.36863 | 0.61331 |
| O246 | 0.19447  | 0.49694 | 0.56087 |
| O247 | 0.19857  | 0.63119 | 0.55426 |
| O248 | -0.00063 | 0.46102 | 0.80548 |
| O249 | 0.98957  | 0.63204 | 0.77885 |
| O250 | 0.14444  | 0.56026 | 0.2195  |
| O251 | 0.21112  | 0.56072 | 0.38912 |
| O252 | 0.30829  | 0.55843 | 0.52577 |
| O253 | 0.40323  | 0.56465 | 0.38575 |
| O254 | 0.40247  | 0.5591  | 0.18925 |
| O255 | 0.27476  | 0.53455 | 0.22191 |
| O256 | 0.14694  | 0.32311 | 0.24517 |
| O257 | 0.20007  | 0.34293 | 0.41978 |
| O258 | 0.31404  | 0.35393 | 0.5189  |

|      |          |         |         |
|------|----------|---------|---------|
| O259 | 0.41612  | 0.33201 | 0.39665 |
| O260 | 0.40081  | 0.3318  | 0.19942 |
| O261 | 0.27726  | 0.34882 | 0.25823 |
| O262 | 0.18947  | 0.44527 | 0.29267 |
| O263 | 0.41465  | 0.44698 | 0.29751 |
| O264 | 0.07469  | 0.6207  | 0.07567 |
| O265 | 0.09068  | 0.48923 | 0.06825 |
| O266 | 0.11596  | 0.35828 | 0.05952 |
| O267 | 0.31374  | 0.62496 | 0.08721 |
| O268 | 0.33318  | 0.49327 | 0.0549  |
| O269 | 0.30799  | 0.36043 | 0.06331 |
| O270 | 0.51392  | 0.53576 | 0.27943 |
| O271 | 0.51737  | 0.36219 | 0.27607 |
| O272 | 0.44391  | 0.74707 | 0.6412  |
| O273 | 0.20067  | 0.74559 | 0.65154 |
| O274 | 0.27491  | 0.7483  | 0.05163 |
| O275 | 0.11287  | 0.74644 | 0.05174 |
| O276 | 0.06799  | 0.24624 | 0.13486 |
| O277 | 0.30813  | 0.24215 | 0.14845 |
| O278 | 0.2343   | 0.24957 | 0.55489 |
| O279 | 0.39557  | 0.24886 | 0.5471  |
| O280 | 0.56392  | 0.24876 | 0.35463 |
| O281 | 0.80216  | 0.24098 | 0.33786 |
| O282 | 0.73187  | 0.24337 | 0.94673 |
| O283 | 0.89264  | 0.24584 | 0.94546 |
| O284 | 0.94094  | 0.74474 | 0.85836 |
| O285 | 0.69483  | 0.75393 | 0.85278 |
| O286 | 0.77545  | 0.74212 | 0.44869 |
| O287 | 0.60854  | 0.74655 | 0.44736 |
| O288 | 0.91904  | 0.21264 | 0.48419 |
| O289 | 0.83492  | 0.19926 | 0.6152  |
| O290 | 0.88148  | 0.31573 | 0.58253 |
| O291 | 0.9537   | 0.22905 | 0.66983 |
| O292 | 0.05433  | 0.25058 | 0.41525 |
| O293 | 0.00207  | 0.34037 | 0.68946 |
| GA29 | 0.93278  | 0.3947  | 0.624   |
| H295 | 0.94595  | 0.24108 | 0.44058 |
| H296 | 0.83293  | 0.34019 | 0.50291 |
| H297 | 0.81799  | 0.17456 | 0.55601 |
| H298 | 0.97034  | 0.53423 | 0.6337  |
| H299 | -0.01238 | 0.28712 | 0.6849  |
| H300 | 0.08458  | 0.56716 | 0.54882 |
| H301 | 0.08291  | 0.59272 | 0.42324 |
| H302 | 0.9607   | 0.58588 | 0.41873 |

|                                                        |         |         |         |
|--------------------------------------------------------|---------|---------|---------|
| H303                                                   | 0.98305 | 0.63237 | 0.52666 |
| H304                                                   | 0.8958  | 0.54646 | 0.56635 |
| H305                                                   | 1.01903 | 0.39236 | 0.43075 |
| H306                                                   | 0.10665 | 0.47211 | 0.40481 |
| H307                                                   | 0.90975 | 0.45072 | 0.46504 |
| H308                                                   | 0.04826 | 0.34982 | 0.67059 |
| AL30                                                   | 0.82469 | 0.32361 | 0.32141 |
| AL31                                                   | 0.80369 | 0.4679  | 0.70982 |
| P311                                                   | 0.90028 | 0.23937 | 0.59252 |
| C312                                                   | 0.94834 | 0.53183 | 0.55826 |
| C313                                                   | 0.05751 | 0.56023 | 0.47782 |
| C314                                                   | 0.98518 | 0.58223 | 0.49203 |
| C315                                                   | 1.01442 | 0.4429  | 0.46221 |
| C316                                                   | 0.95176 | 0.45997 | 0.51614 |
| C317                                                   | 0.06255 | 0.48824 | 0.44562 |
| C318                                                   | 0.07996 | 0.25735 | 0.49103 |
| <b>C<sub>6</sub>H<sub>8</sub>+Ga(H)+CO<sub>2</sub></b> |         |         |         |
| SI2                                                    | 0.42696 | 0.05451 | 0.64388 |
| SI3                                                    | 0.3054  | 0.02237 | 0.78274 |
| SI4                                                    | 0.28327 | 0.05226 | 0.00883 |
| SI5                                                    | 0.12334 | 0.05756 | 0.01019 |
| SI6                                                    | 0.0718  | 0.02497 | 0.79602 |
| SI7                                                    | 0.17943 | 0.05364 | 0.64623 |
| SI8                                                    | 0.42169 | 0.82187 | 0.67165 |
| SI9                                                    | 0.3046  | 0.86402 | 0.80804 |
| SI10                                                   | 0.26971 | 0.82589 | 0.02932 |
| SI11                                                   | 0.11506 | 0.82247 | 0.01777 |
| SI12                                                   | 0.0658  | 0.86668 | 0.80153 |
| SI13                                                   | 0.182   | 0.82176 | 0.67367 |
| SI14                                                   | 0.07798 | 0.93845 | 0.15033 |
| SI15                                                   | 0.19953 | 0.96858 | 0.29469 |
| SI16                                                   | 0.21897 | 0.93221 | 0.51441 |
| SI17                                                   | 0.37838 | 0.9309  | 0.51554 |
| SI18                                                   | 0.43288 | 0.96497 | 0.30636 |
| SI19                                                   | 0.32366 | 0.93908 | 0.15596 |
| SI20                                                   | 0.08317 | 0.16692 | 0.16295 |
| SI21                                                   | 0.20194 | 0.12564 | 0.3052  |
| SI22                                                   | 0.23666 | 0.17132 | 0.52096 |
| SI23                                                   | 0.3903  | 0.1714  | 0.5103  |
| SI24                                                   | 0.43984 | 0.12308 | 0.30123 |
| SI25                                                   | 0.32418 | 0.15938 | 0.16533 |
| SI26                                                   | 0.5773  | 0.55999 | 0.33533 |
| SI27                                                   | 0.68507 | 0.53006 | 0.1775  |

|      |         |         |         |
|------|---------|---------|---------|
| SI28 | 0.7127  | 0.55074 | 0.96109 |
| SI29 | 0.87054 | 0.55854 | 0.96668 |
| SI30 | 0.92958 | 0.52579 | 0.17714 |
| SI31 | 0.80789 | 0.55843 | 0.30365 |
| SI32 | 0.58127 | 0.32704 | 0.32378 |
| SI33 | 0.69384 | 0.37152 | 0.17776 |
| SI34 | 0.72742 | 0.32083 | 0.96735 |
| SI35 | 0.8816  | 0.3195  | 0.98091 |
| SI36 | 0.93595 | 0.36715 | 0.1887  |
| SI37 | 0.92327 | 0.43209 | 0.83868 |
| SI38 | 0.77503 | 0.44321 | 0.46687 |
| SI39 | 0.6173  | 0.43823 | 0.48128 |
| SI40 | 0.5645  | 0.46795 | 0.69765 |
| SI41 | 0.67918 | 0.42513 | 0.82148 |
| SI42 | 0.91755 | 0.66925 | 0.81634 |
| SI43 | 0.80447 | 0.63087 | 0.67824 |
| SI44 | 0.76492 | 0.66403 | 0.46026 |
| SI45 | 0.60992 | 0.66997 | 0.47595 |
| SI46 | 0.56439 | 0.62459 | 0.69429 |
| SI47 | 0.68401 | 0.67245 | 0.81006 |
| SI48 | 0.57889 | 0.93961 | 0.36511 |
| SI49 | 0.69689 | 0.96274 | 0.22205 |
| SI50 | 0.72269 | 0.92962 | 0.99909 |
| SI51 | 0.88254 | 0.92679 | 0.99751 |
| SI52 | 0.93309 | 0.96686 | 0.20714 |
| SI53 | 0.8237  | 0.94207 | 0.36038 |
| SI54 | 0.58174 | 0.17173 | 0.34018 |
| SI55 | 0.69952 | 0.11838 | 0.20837 |
| SI56 | 0.73345 | 0.16133 | 0.98639 |
| SI57 | 0.88739 | 0.16621 | 0.98782 |
| SI58 | 0.93873 | 0.12446 | 0.19932 |
| SI59 | 0.82259 | 0.16402 | 0.33396 |
| SI60 | 0.92665 | 0.04766 | 0.85909 |
| SI61 | 0.80359 | 0.02119 | 0.71513 |
| SI62 | 0.78512 | 0.06436 | 0.49697 |
| SI63 | 0.62496 | 0.06806 | 0.49309 |
| SI64 | 0.57221 | 0.02363 | 0.70261 |
| SI65 | 0.67937 | 0.04612 | 0.85758 |
| SI66 | 0.92221 | 0.82241 | 0.84098 |
| SI67 | 0.80186 | 0.86461 | 0.69958 |
| SI68 | 0.77018 | 0.82152 | 0.48341 |
| SI69 | 0.61602 | 0.82354 | 0.50001 |
| SI70 | 0.5666  | 0.86585 | 0.70863 |
| SI71 | 0.68219 | 0.82607 | 0.84001 |

|      |         |         |         |
|------|---------|---------|---------|
| SI72 | 0.42265 | 0.44381 | 0.6429  |
| SI73 | 0.30556 | 0.47005 | 0.79562 |
| SI74 | 0.28729 | 0.42811 | 0.01017 |
| SI75 | 0.12943 | 0.42875 | 0.00898 |
| SI76 | 0.07398 | 0.46487 | 0.80001 |
| SI77 | 0.18594 | 0.44374 | 0.65644 |
| SI78 | 0.42468 | 0.66712 | 0.65636 |
| SI79 | 0.30181 | 0.62551 | 0.79326 |
| SI80 | 0.27045 | 0.67077 | 0.00517 |
| SI81 | 0.11621 | 0.66827 | 0.00422 |
| SI82 | 0.06431 | 0.62331 | 0.79516 |
| SI83 | 0.17997 | 0.66331 | 0.65987 |
| SI84 | 0.07704 | 0.55031 | 0.14092 |
| SI85 | 0.20177 | 0.52461 | 0.27879 |
| SI86 | 0.22581 | 0.56178 | 0.50636 |
| SI87 | 0.38549 | 0.56472 | 0.50101 |
| SI88 | 0.43201 | 0.52642 | 0.28616 |
| SI89 | 0.32646 | 0.55331 | 0.13512 |
| SI90 | 0.08409 | 0.32209 | 0.16095 |
| SI91 | 0.19995 | 0.36337 | 0.30463 |
| SI92 | 0.23787 | 0.32897 | 0.52401 |
| SI93 | 0.39191 | 0.32628 | 0.51056 |
| SI94 | 0.43744 | 0.36821 | 0.29176 |
| SI95 | 0.31983 | 0.31665 | 0.16759 |
| O96  | 0.36253 | 0.05947 | 0.71704 |
| O97  | 0.30324 | 0.05686 | 0.8921  |
| O98  | 0.20298 | 0.04542 | 0.02431 |
| O99  | 0.10407 | 0.06147 | 0.89309 |
| O100 | 0.10534 | 0.05616 | 0.69571 |
| O101 | 0.23271 | 0.03161 | 0.73154 |
| O102 | 0.36074 | 0.81931 | 0.7515  |
| O103 | 0.30692 | 0.8459  | 0.92581 |
| O104 | 0.19188 | 0.84953 | 0.02253 |
| O105 | 0.08693 | 0.83063 | 0.90524 |
| O106 | 0.10454 | 0.83082 | 0.70865 |
| O107 | 0.23058 | 0.84733 | 0.76386 |
| O108 | 0.32261 | 0.94277 | 0.79083 |
| O109 | 0.08742 | 0.94508 | 0.8039  |
| O110 | 0.43594 | 0.12463 | 0.58263 |
| O111 | 0.41897 | 0.99363 | 0.56372 |
| O112 | 0.39923 | 0.8618  | 0.57135 |
| O113 | 0.19621 | 0.12812 | 0.6039  |
| O114 | 0.17989 | 0.99795 | 0.55713 |
| O115 | 0.1962  | 0.8641  | 0.57207 |

|      |         |         |         |
|------|---------|---------|---------|
| O116 | 0.99197 | 0.0377  | 0.78914 |
| O117 | 0.98551 | 0.85922 | 0.78686 |
| O118 | 0.14342 | 0.93754 | 0.2212  |
| O119 | 0.20042 | 0.92427 | 0.39683 |
| O120 | 0.2988  | 0.94403 | 0.5291  |
| O121 | 0.39786 | 0.92437 | 0.39824 |
| O122 | 0.39875 | 0.94204 | 0.2016  |
| O123 | 0.2723  | 0.96518 | 0.24165 |
| O124 | 0.14671 | 0.16314 | 0.23725 |
| O125 | 0.20201 | 0.16309 | 0.41237 |
| O126 | 0.31348 | 0.14435 | 0.51661 |
| O127 | 0.41539 | 0.16855 | 0.3952  |
| O128 | 0.40113 | 0.14724 | 0.2005  |
| O129 | 0.27529 | 0.13196 | 0.2538  |
| O130 | 0.18277 | 0.04682 | 0.31953 |
| O131 | 0.42266 | 0.04503 | 0.32514 |
| O132 | 0.07026 | 0.86574 | 0.09584 |
| O133 | 0.08367 | 0.9961  | 0.06421 |
| O134 | 0.10071 | 0.1284  | 0.05936 |
| O135 | 0.30628 | 0.86252 | 0.12284 |
| O136 | 0.31917 | 0.98669 | 0.05746 |
| O137 | 0.30997 | 0.12023 | 0.0616  |
| O138 | 0.51191 | 0.94792 | 0.29838 |
| O139 | 0.51965 | 0.13365 | 0.28495 |
| O140 | 0.63772 | 0.56907 | 0.25651 |
| O141 | 0.67123 | 0.55761 | 0.06536 |
| O142 | 0.792   | 0.54622 | 0.98551 |
| O143 | 0.91062 | 0.56116 | 0.0715  |
| O144 | 0.88462 | 0.55805 | 0.26584 |
| O145 | 0.76198 | 0.5484  | 0.20538 |
| O146 | 0.64362 | 0.32709 | 0.24726 |
| O147 | 0.68496 | 0.34637 | 0.06312 |
| O148 | 0.80501 | 0.34642 | 0.97431 |
| O149 | 0.90906 | 0.32334 | 0.0944  |
| O150 | 0.90188 | 0.33781 | 0.29055 |
| O151 | 0.76972 | 0.36121 | 0.21354 |
| O152 | 0.67101 | 0.45    | 0.18676 |
| O153 | 0.91631 | 0.44537 | 0.16911 |
| O154 | 0.5662  | 0.63159 | 0.39113 |
| O155 | 0.59219 | 0.50299 | 0.41893 |
| O156 | 0.59947 | 0.36878 | 0.4245  |
| O157 | 0.79409 | 0.62901 | 0.35998 |
| O158 | 0.79143 | 0.49651 | 0.38003 |
| O159 | 0.7934  | 0.36656 | 0.42282 |

|      |         |         |         |
|------|---------|---------|---------|
| O160 | 0.00752 | 0.54174 | 0.20159 |
| O161 | 0.01676 | 0.3606  | 0.19659 |
| O162 | 0.87215 | 0.42011 | 0.74235 |
| O163 | 0.82108 | 0.45104 | 0.56601 |
| O164 | 0.69742 | 0.44515 | 0.49654 |
| O165 | 0.58145 | 0.43607 | 0.58893 |
| O166 | 0.60129 | 0.42666 | 0.78569 |
| O167 | 0.7279  | 0.43863 | 0.72885 |
| O168 | 0.86519 | 0.67646 | 0.72418 |
| O169 | 0.80704 | 0.63756 | 0.55643 |
| O170 | 0.68681 | 0.64293 | 0.47431 |
| O171 | 0.5775  | 0.65498 | 0.58396 |
| O172 | 0.60628 | 0.66767 | 0.77569 |
| O173 | 0.73242 | 0.6621  | 0.71344 |
| O174 | 0.81344 | 0.55474 | 0.71512 |
| O175 | 0.58759 | 0.5465  | 0.70004 |
| O176 | 0.92741 | 0.36564 | 0.90767 |
| O177 | 0.89901 | 0.49629 | 0.90088 |
| O178 | 0.88356 | 0.62874 | 0.90869 |
| O179 | 0.69278 | 0.35074 | 0.86788 |
| O180 | 0.689   | 0.48196 | 0.90811 |
| O181 | 0.69901 | 0.61692 | 0.8947  |
| O182 | 0.48445 | 0.46171 | 0.71627 |
| O183 | 0.48503 | 0.63187 | 0.7192  |
| O184 | 0.64166 | 0.92517 | 0.29112 |
| O185 | 0.702   | 0.92439 | 0.11567 |
| O186 | 0.80283 | 0.93949 | 0.98385 |
| O187 | 0.90144 | 0.924   | 0.11518 |
| O188 | 0.89798 | 0.94543 | 0.31183 |
| O189 | 0.76977 | 0.95963 | 0.27411 |
| O190 | 0.6475  | 0.16433 | 0.27059 |
| O191 | 0.70157 | 0.14693 | 0.09546 |
| O192 | 0.81128 | 0.13703 | 0.98754 |
| O193 | 0.91619 | 0.16684 | 0.10116 |
| O194 | 0.8993  | 0.15302 | 0.29633 |
| O195 | 0.77303 | 0.12105 | 0.26086 |
| O196 | 0.67446 | 0.04067 | 0.20704 |
| O197 | 0.92037 | 0.04583 | 0.1829  |
| O198 | 0.5688  | 0.87601 | 0.43985 |
| O199 | 0.59075 | 0.00653 | 0.43227 |
| O200 | 0.59592 | 0.13855 | 0.44973 |
| O201 | 0.8115  | 0.86723 | 0.40449 |
| O202 | 0.81809 | 0.99698 | 0.45013 |
| O203 | 0.81966 | 0.13207 | 0.44878 |

|      |         |         |         |
|------|---------|---------|---------|
| O204 | 0.01246 | 0.95176 | 0.21877 |
| O205 | 0.01862 | 0.13315 | 0.21749 |
| O206 | 0.86122 | 0.04934 | 0.78831 |
| O207 | 0.80198 | 0.06796 | 0.61534 |
| O208 | 0.70541 | 0.06493 | 0.47591 |
| O209 | 0.60778 | 0.06416 | 0.61123 |
| O210 | 0.60517 | 0.04509 | 0.80879 |
| O211 | 0.7319  | 0.0253  | 0.77045 |
| O212 | 0.85745 | 0.83104 | 0.77059 |
| O213 | 0.8045  | 0.82601 | 0.59314 |
| O214 | 0.69341 | 0.84872 | 0.49132 |
| O215 | 0.59307 | 0.81962 | 0.6163  |
| O216 | 0.60469 | 0.84208 | 0.81022 |
| O217 | 0.72855 | 0.85674 | 0.75058 |
| O218 | 0.8182  | 0.9439  | 0.68292 |
| O219 | 0.58317 | 0.94381 | 0.68258 |
| O220 | 0.93372 | 0.11884 | 0.91762 |
| O221 | 0.92239 | 0.98724 | 0.94103 |
| O222 | 0.90612 | 0.85552 | 0.9496  |
| O223 | 0.69365 | 0.12093 | 0.89981 |
| O224 | 0.68393 | 0.99323 | 0.94976 |
| O225 | 0.69964 | 0.86032 | 0.94645 |
| O226 | 0.49341 | 0.04179 | 0.71029 |
| O227 | 0.48644 | 0.857   | 0.72365 |
| O228 | 0.35512 | 0.44287 | 0.70937 |
| O229 | 0.31177 | 0.42301 | 0.89448 |
| O230 | 0.20829 | 0.44687 | 0.01696 |
| O231 | 0.10722 | 0.42457 | 0.89278 |
| O232 | 0.10864 | 0.44376 | 0.6945  |
| O233 | 0.22982 | 0.46452 | 0.75338 |
| O234 | 0.35574 | 0.65707 | 0.71728 |
| O235 | 0.30013 | 0.67243 | 0.89221 |
| O236 | 0.19379 | 0.64307 | 0.00425 |
| O237 | 0.08783 | 0.66829 | 0.89038 |
| O238 | 0.10314 | 0.64914 | 0.69489 |
| O239 | 0.22842 | 0.62664 | 0.74111 |
| O240 | 0.32087 | 0.54844 | 0.82327 |
| O241 | 0.08185 | 0.54513 | 0.81865 |
| O242 | 0.43354 | 0.37078 | 0.59098 |
| O243 | 0.41848 | 0.49911 | 0.55353 |
| O244 | 0.41761 | 0.63293 | 0.5466  |
| O245 | 0.20431 | 0.36889 | 0.61712 |
| O246 | 0.19674 | 0.49695 | 0.56608 |
| O247 | 0.19323 | 0.63079 | 0.55008 |



|      |         |         |         |
|------|---------|---------|---------|
| O248 | 0.99597 | 0.44447 | 0.78981 |
| O249 | 0.98457 | 0.63092 | 0.77692 |
| O250 | 0.13745 | 0.55574 | 0.2215  |
| O251 | 0.20622 | 0.5568  | 0.38957 |
| O252 | 0.30583 | 0.56375 | 0.52159 |
| O253 | 0.40138 | 0.56427 | 0.38306 |
| O254 | 0.39876 | 0.55927 | 0.18769 |
| O255 | 0.26916 | 0.54414 | 0.21954 |
| O256 | 0.13752 | 0.32581 | 0.25198 |
| O257 | 0.19639 | 0.34632 | 0.42291 |
| O258 | 0.31484 | 0.35306 | 0.50831 |
| O259 | 0.42252 | 0.33321 | 0.3991  |
| O260 | 0.3962  | 0.33103 | 0.20283 |
| O261 | 0.27058 | 0.33719 | 0.25956 |
| O262 | 0.19379 | 0.44362 | 0.28548 |
| O263 | 0.4152  | 0.44668 | 0.29503 |
| O264 | 0.07288 | 0.61861 | 0.07472 |
| O265 | 0.08676 | 0.48663 | 0.06594 |
| O266 | 0.11498 | 0.35647 | 0.06085 |
| O267 | 0.31535 | 0.62174 | 0.0731  |
| O268 | 0.32876 | 0.48822 | 0.06265 |
| O269 | 0.30163 | 0.35737 | 0.06606 |
| O270 | 0.51125 | 0.53856 | 0.27426 |
| O271 | 0.51673 | 0.36073 | 0.26855 |
| O272 | 0.44026 | 0.74591 | 0.63892 |
| O273 | 0.19567 | 0.7429  | 0.65128 |
| O274 | 0.27412 | 0.74592 | 0.05063 |
| O275 | 0.11101 | 0.74384 | 0.04916 |
| O276 | 0.06729 | 0.24449 | 0.13552 |
| O277 | 0.31057 | 0.2379  | 0.14266 |
| O278 | 0.23597 | 0.24991 | 0.55246 |
| O279 | 0.39571 | 0.24875 | 0.54734 |
| O280 | 0.56439 | 0.25038 | 0.3568  |
| O281 | 0.80237 | 0.24139 | 0.33899 |
| O282 | 0.72696 | 0.23987 | 0.95996 |
| O283 | 0.88802 | 0.24212 | 0.94356 |
| O284 | 0.93818 | 0.74336 | 0.85699 |
| O285 | 0.69591 | 0.74671 | 0.85622 |
| O286 | 0.77226 | 0.74451 | 0.44514 |
| O287 | 0.60781 | 0.74962 | 0.4511  |
| O288 | 0.95134 | 0.2624  | 0.44472 |
| O289 | 0.90422 | 0.19904 | 0.58987 |
| O290 | 0.86296 | 0.32147 | 0.55382 |
| O291 | 0.96932 | 0.30604 | 0.62864 |

|                          |         |         |         |
|--------------------------|---------|---------|---------|
| O292                     | 0.09239 | 0.24759 | 0.57204 |
| O293                     | 0.10041 | 0.2684  | 0.74461 |
| GA29                     | 0.91935 | 0.3958  | 0.61541 |
| H295                     | 0.93785 | 0.29451 | 0.38992 |
| H296                     | 0.8203  | 0.34069 | 0.48122 |
| H297                     | 0.87777 | 0.17206 | 0.54123 |
| H298                     | 0.09035 | 0.5779  | 0.51587 |
| H299                     | 0.06586 | 0.57916 | 0.38971 |
| H300                     | 0.97678 | 0.62391 | 0.53015 |
| H301                     | 0.96892 | 0.45363 | 0.60115 |
| H302                     | 0.88306 | 0.55081 | 0.4899  |
| H303                     | 0.01404 | 0.3975  | 0.37162 |
| H304                     | 0.11027 | 0.46503 | 0.4257  |
| H305                     | 0.90176 | 0.44672 | 0.38253 |
| H306                     | 0.06382 | 0.4603  | 0.53672 |
| AL30                     | 0.81521 | 0.32399 | 0.30625 |
| AL30                     | 0.80295 | 0.47051 | 0.69247 |
| P309                     | 0.92376 | 0.27094 | 0.55346 |
| C310                     | 0.93346 | 0.53571 | 0.46947 |
| C311                     | 0.05456 | 0.55624 | 0.46309 |
| C312                     | 0.98515 | 0.57571 | 0.49307 |
| C313                     | 0.00548 | 0.4455  | 0.40874 |
| C314                     | 0.94402 | 0.47247 | 0.4163  |
| C315                     | 0.0625  | 0.47971 | 0.45906 |
| C316                     | 0.09588 | 0.25824 | 0.65841 |
| <b>TS<sub>COOH</sub></b> |         |         |         |
| SI2                      | 0.42593 | 0.05394 | 0.64458 |
| SI3                      | 0.30525 | 0.02301 | 0.78556 |
| SI4                      | 0.28151 | 0.0547  | 0.00963 |
| SI5                      | 0.12138 | 0.05864 | 0.01085 |
| SI6                      | 0.07042 | 0.02517 | 0.79683 |
| SI7                      | 0.17967 | 0.05245 | 0.64867 |
| SI8                      | 0.42214 | 0.82263 | 0.67144 |
| SI9                      | 0.30565 | 0.86511 | 0.81021 |
| SI10                     | 0.26973 | 0.82608 | 0.03028 |
| SI11                     | 0.11527 | 0.82272 | 0.0193  |
| SI12                     | 0.06561 | 0.86675 | 0.80374 |
| SI13                     | 0.18293 | 0.82238 | 0.67658 |
| SI14                     | 0.07797 | 0.93896 | 0.15151 |
| SI15                     | 0.1988  | 0.96935 | 0.2973  |
| SI16                     | 0.21878 | 0.93125 | 0.51591 |
| SI17                     | 0.37814 | 0.93026 | 0.51535 |
| SI18                     | 0.43158 | 0.96509 | 0.30508 |

|      |         |         |         |
|------|---------|---------|---------|
| SI19 | 0.32159 | 0.94081 | 0.15624 |
| SI20 | 0.08212 | 0.16739 | 0.16544 |
| SI21 | 0.20043 | 0.12608 | 0.3093  |
| SI22 | 0.23553 | 0.17191 | 0.52427 |
| SI23 | 0.38981 | 0.17134 | 0.511   |
| SI24 | 0.43913 | 0.12338 | 0.30147 |
| SI25 | 0.32187 | 0.16044 | 0.16888 |
| SI26 | 0.58135 | 0.55769 | 0.33621 |
| SI27 | 0.6876  | 0.53035 | 0.17901 |
| SI28 | 0.71666 | 0.55128 | 0.96119 |
| SI29 | 0.87456 | 0.55786 | 0.97142 |
| SI30 | 0.93134 | 0.5257  | 0.1827  |
| SI31 | 0.81022 | 0.55461 | 0.31016 |
| SI32 | 0.58166 | 0.32654 | 0.3251  |
| SI33 | 0.69437 | 0.3727  | 0.18043 |
| SI34 | 0.72987 | 0.32187 | 0.96827 |
| SI35 | 0.88415 | 0.32027 | 0.97853 |
| SI36 | 0.93809 | 0.36698 | 0.18854 |
| SI37 | 0.92828 | 0.43418 | 0.83999 |
| SI38 | 0.77957 | 0.43668 | 0.47121 |
| SI39 | 0.62222 | 0.43524 | 0.48209 |
| SI40 | 0.56625 | 0.4685  | 0.69684 |
| SI41 | 0.67994 | 0.42624 | 0.82238 |
| SI42 | 0.91889 | 0.66936 | 0.8199  |
| SI43 | 0.80484 | 0.63317 | 0.67945 |
| SI44 | 0.76527 | 0.66382 | 0.46136 |
| SI45 | 0.61056 | 0.66827 | 0.47948 |
| SI46 | 0.56612 | 0.62502 | 0.69879 |
| SI47 | 0.68623 | 0.6739  | 0.81331 |
| SI48 | 0.57547 | 0.93815 | 0.36333 |
| SI49 | 0.69389 | 0.96381 | 0.22009 |
| SI50 | 0.72064 | 0.93283 | 0.99829 |
| SI51 | 0.88053 | 0.92811 | 0.99416 |
| SI52 | 0.93321 | 0.96613 | 0.20323 |
| SI53 | 0.82182 | 0.9408  | 0.35396 |
| SI54 | 0.58169 | 0.17137 | 0.33594 |
| SI55 | 0.69518 | 0.11864 | 0.19803 |
| SI56 | 0.73295 | 0.16181 | 0.98045 |
| SI57 | 0.88699 | 0.16648 | 0.9872  |
| SI58 | 0.93795 | 0.12355 | 0.19795 |
| SI59 | 0.81759 | 0.16136 | 0.32421 |
| SI60 | 0.92464 | 0.04876 | 0.85417 |
| SI61 | 0.80265 | 0.02033 | 0.71013 |
| SI62 | 0.77968 | 0.05866 | 0.49104 |

|      |         |         |         |
|------|---------|---------|---------|
| SI63 | 0.62101 | 0.06464 | 0.48986 |
| SI64 | 0.5713  | 0.02436 | 0.7011  |
| SI65 | 0.68012 | 0.04724 | 0.8532  |
| SI66 | 0.92114 | 0.82231 | 0.8378  |
| SI67 | 0.80263 | 0.86374 | 0.69413 |
| SI68 | 0.76828 | 0.82103 | 0.4774  |
| SI69 | 0.61433 | 0.82199 | 0.49677 |
| SI70 | 0.56657 | 0.8668  | 0.70594 |
| SI71 | 0.68278 | 0.82749 | 0.83732 |
| SI72 | 0.42382 | 0.44365 | 0.64316 |
| SI73 | 0.30892 | 0.47056 | 0.79853 |
| SI74 | 0.28937 | 0.42897 | 0.01295 |
| SI75 | 0.1317  | 0.42929 | 0.01145 |
| SI76 | 0.07782 | 0.46848 | 0.80395 |
| SI77 | 0.18973 | 0.4466  | 0.65842 |
| SI78 | 0.42675 | 0.66767 | 0.66039 |
| SI79 | 0.30457 | 0.62568 | 0.79762 |
| SI80 | 0.27137 | 0.67082 | 0.0098  |
| SI81 | 0.11705 | 0.66943 | 0.00726 |
| SI82 | 0.06579 | 0.62514 | 0.80028 |
| SI83 | 0.18216 | 0.66354 | 0.6652  |
| SI84 | 0.07872 | 0.55066 | 0.1425  |
| SI85 | 0.20277 | 0.52528 | 0.28201 |
| SI86 | 0.22798 | 0.56417 | 0.50719 |
| SI87 | 0.38789 | 0.56626 | 0.50219 |
| SI88 | 0.43471 | 0.52591 | 0.28904 |
| SI89 | 0.32847 | 0.55297 | 0.13963 |
| SI90 | 0.08591 | 0.32261 | 0.16322 |
| SI91 | 0.20044 | 0.36451 | 0.30926 |
| SI92 | 0.23764 | 0.3291  | 0.52912 |
| SI93 | 0.39184 | 0.32569 | 0.51302 |
| SI94 | 0.4374  | 0.36838 | 0.29513 |
| SI95 | 0.32009 | 0.31808 | 0.17154 |
| O96  | 0.36151 | 0.05964 | 0.71757 |
| O97  | 0.30292 | 0.05993 | 0.8934  |
| O98  | 0.20118 | 0.04733 | 0.02302 |
| O99  | 0.10075 | 0.06292 | 0.89436 |
| O100 | 0.10541 | 0.0549  | 0.69704 |
| O101 | 0.23217 | 0.02919 | 0.73472 |
| O102 | 0.36104 | 0.82099 | 0.75102 |
| O103 | 0.30813 | 0.84424 | 0.92701 |
| O104 | 0.19207 | 0.84984 | 0.02098 |
| O105 | 0.08582 | 0.83006 | 0.90742 |
| O106 | 0.10547 | 0.83157 | 0.71133 |

|      |         |         |         |
|------|---------|---------|---------|
| O107 | 0.2314  | 0.85019 | 0.76541 |
| O108 | 0.3244  | 0.94402 | 0.79757 |
| O109 | 0.08602 | 0.94538 | 0.80832 |
| O110 | 0.43503 | 0.12369 | 0.58272 |
| O111 | 0.41837 | 0.99262 | 0.56509 |
| O112 | 0.39986 | 0.86064 | 0.56934 |
| O113 | 0.19834 | 0.12643 | 0.6074  |
| O114 | 0.17995 | 0.9967  | 0.5595  |
| O115 | 0.1963  | 0.86271 | 0.57291 |
| O116 | 0.99072 | 0.03792 | 0.7864  |
| O117 | 0.98557 | 0.85885 | 0.78678 |
| O118 | 0.14308 | 0.93869 | 0.22281 |
| O119 | 0.20014 | 0.92385 | 0.39822 |
| O120 | 0.29867 | 0.94275 | 0.53041 |
| O121 | 0.39691 | 0.92489 | 0.39765 |
| O122 | 0.3969  | 0.9436  | 0.20035 |
| O123 | 0.27129 | 0.96684 | 0.24329 |
| O124 | 0.1455  | 0.16269 | 0.23967 |
| O125 | 0.20001 | 0.16413 | 0.41591 |
| O126 | 0.31271 | 0.14568 | 0.51557 |
| O127 | 0.4161  | 0.16866 | 0.39636 |
| O128 | 0.39915 | 0.14773 | 0.20196 |
| O129 | 0.27383 | 0.13209 | 0.25767 |
| O130 | 0.18169 | 0.04716 | 0.32421 |
| O131 | 0.42299 | 0.04514 | 0.32536 |
| O132 | 0.0709  | 0.86619 | 0.09738 |
| O133 | 0.08291 | 0.99659 | 0.06536 |
| O134 | 0.09864 | 0.12901 | 0.06142 |
| O135 | 0.30464 | 0.86411 | 0.12379 |
| O136 | 0.31665 | 0.98868 | 0.05813 |
| O137 | 0.30702 | 0.12258 | 0.06421 |
| O138 | 0.50984 | 0.94544 | 0.29363 |
| O139 | 0.51872 | 0.13388 | 0.28253 |
| O140 | 0.63937 | 0.57168 | 0.25454 |
| O141 | 0.6775  | 0.55936 | 0.06699 |
| O142 | 0.79593 | 0.54149 | 0.98206 |
| O143 | 0.9093  | 0.56359 | 0.0803  |
| O144 | 0.88765 | 0.555   | 0.27535 |
| O145 | 0.76482 | 0.54376 | 0.21156 |
| O146 | 0.64296 | 0.32761 | 0.24675 |
| O147 | 0.68922 | 0.34632 | 0.06612 |
| O148 | 0.80752 | 0.34754 | 0.97354 |
| O149 | 0.91278 | 0.32525 | 0.09134 |
| O150 | 0.90324 | 0.33522 | 0.28811 |

|      |         |         |         |
|------|---------|---------|---------|
| O151 | 0.76925 | 0.36491 | 0.22212 |
| O152 | 0.66982 | 0.45088 | 0.1861  |
| O153 | 0.91806 | 0.44545 | 0.17231 |
| O154 | 0.56728 | 0.62669 | 0.39749 |
| O155 | 0.60388 | 0.49968 | 0.41428 |
| O156 | 0.60207 | 0.36584 | 0.4272  |
| O157 | 0.79463 | 0.62549 | 0.3641  |
| O158 | 0.7946  | 0.49287 | 0.38799 |
| O159 | 0.80184 | 0.36104 | 0.42913 |
| O160 | 0.0097  | 0.5416  | 0.20482 |
| O161 | 0.01888 | 0.36173 | 0.19915 |
| O162 | 0.87607 | 0.42783 | 0.74517 |
| O163 | 0.82603 | 0.44461 | 0.5718  |
| O164 | 0.70244 | 0.43668 | 0.50268 |
| O165 | 0.58363 | 0.43808 | 0.58736 |
| O166 | 0.60262 | 0.42621 | 0.78423 |
| O167 | 0.72956 | 0.43842 | 0.73029 |
| O168 | 0.86627 | 0.67595 | 0.72817 |
| O169 | 0.80898 | 0.64184 | 0.55824 |
| O170 | 0.68768 | 0.64187 | 0.47822 |
| O171 | 0.57932 | 0.6567  | 0.58919 |
| O172 | 0.60814 | 0.66632 | 0.78204 |
| O173 | 0.73323 | 0.66515 | 0.71466 |
| O174 | 0.81192 | 0.55606 | 0.71194 |
| O175 | 0.5894  | 0.54689 | 0.7014  |
| O176 | 0.92997 | 0.36471 | 0.90299 |
| O177 | 0.90916 | 0.49636 | 0.91104 |
| O178 | 0.8864  | 0.62801 | 0.91264 |
| O179 | 0.69356 | 0.35268 | 0.87095 |
| O180 | 0.68813 | 0.48484 | 0.90678 |
| O181 | 0.70559 | 0.61914 | 0.89725 |
| O182 | 0.48631 | 0.46244 | 0.71462 |
| O183 | 0.48689 | 0.63271 | 0.72418 |
| O184 | 0.64053 | 0.92683 | 0.29277 |
| O185 | 0.69749 | 0.92507 | 0.11374 |
| O186 | 0.80091 | 0.94288 | 0.98785 |
| O187 | 0.90364 | 0.92326 | 0.10994 |
| O188 | 0.896   | 0.94414 | 0.30584 |
| O189 | 0.76787 | 0.96194 | 0.26926 |
| O190 | 0.64585 | 0.16624 | 0.26238 |
| O191 | 0.69415 | 0.14396 | 0.0834  |
| O192 | 0.81061 | 0.13797 | 0.99005 |
| O193 | 0.91692 | 0.16703 | 0.10001 |
| O194 | 0.89548 | 0.1484  | 0.29463 |

|      |         |         |         |
|------|---------|---------|---------|
| O195 | 0.77064 | 0.1225  | 0.24357 |
| O196 | 0.66998 | 0.04119 | 0.20435 |
| O197 | 0.92142 | 0.04499 | 0.17738 |
| O198 | 0.5664  | 0.87292 | 0.43512 |
| O199 | 0.58108 | 0.00476 | 0.43337 |
| O200 | 0.59881 | 0.13667 | 0.4434  |
| O201 | 0.80796 | 0.86552 | 0.39506 |
| O202 | 0.81823 | 0.99382 | 0.44647 |
| O203 | 0.80672 | 0.12797 | 0.4371  |
| O204 | 0.01218 | 0.95138 | 0.21971 |
| O205 | 0.01708 | 0.13441 | 0.22005 |
| O206 | 0.85999 | 0.05161 | 0.78131 |
| O207 | 0.79685 | 0.06568 | 0.60894 |
| O208 | 0.70032 | 0.05178 | 0.47087 |
| O209 | 0.60487 | 0.06552 | 0.60847 |
| O210 | 0.60548 | 0.04651 | 0.80604 |
| O211 | 0.73144 | 0.02106 | 0.76758 |
| O212 | 0.85901 | 0.82804 | 0.7615  |
| O213 | 0.8037  | 0.82714 | 0.58603 |
| O214 | 0.69145 | 0.84766 | 0.48689 |
| O215 | 0.59175 | 0.82023 | 0.61327 |
| O216 | 0.60533 | 0.8423  | 0.80644 |
| O217 | 0.72979 | 0.85542 | 0.74666 |
| O218 | 0.82002 | 0.94312 | 0.68033 |
| O219 | 0.58365 | 0.94475 | 0.68044 |
| O220 | 0.93167 | 0.11918 | 0.91473 |
| O221 | 0.91912 | 0.98812 | 0.93546 |
| O222 | 0.90054 | 0.8568  | 0.94346 |
| O223 | 0.69797 | 0.1233  | 0.88733 |
| O224 | 0.68351 | 0.99794 | 0.95006 |
| O225 | 0.69902 | 0.86459 | 0.94181 |
| O226 | 0.49239 | 0.04136 | 0.71131 |
| O227 | 0.48648 | 0.85905 | 0.72261 |
| O228 | 0.35792 | 0.44198 | 0.71277 |
| O229 | 0.31376 | 0.42334 | 0.89734 |
| O230 | 0.21039 | 0.44796 | 0.02082 |
| O231 | 0.11081 | 0.42539 | 0.89447 |
| O232 | 0.11318 | 0.45319 | 0.69738 |
| O233 | 0.23352 | 0.46717 | 0.7555  |
| O234 | 0.35754 | 0.65824 | 0.72088 |
| O235 | 0.30321 | 0.67117 | 0.89806 |
| O236 | 0.19448 | 0.64371 | 0.00603 |
| O237 | 0.0883  | 0.67217 | 0.8937  |
| O238 | 0.1053  | 0.64878 | 0.69957 |

|      |         |         |         |
|------|---------|---------|---------|
| O239 | 0.23083 | 0.6269  | 0.74626 |
| O240 | 0.32536 | 0.54877 | 0.82584 |
| O241 | 0.08342 | 0.54799 | 0.83013 |
| O242 | 0.43482 | 0.37068 | 0.59138 |
| O243 | 0.4174  | 0.49879 | 0.55403 |
| O244 | 0.42112 | 0.63282 | 0.55096 |
| O245 | 0.20636 | 0.3708  | 0.62222 |
| O246 | 0.2025  | 0.49739 | 0.56547 |
| O247 | 0.19461 | 0.63153 | 0.55489 |
| O248 | 1.00055 | 0.44653 | 0.78979 |
| O249 | 0.98624 | 0.63216 | 0.77936 |
| O250 | 0.14023 | 0.55706 | 0.22101 |
| O251 | 0.2059  | 0.56039 | 0.3911  |
| O252 | 0.30803 | 0.56887 | 0.51853 |
| O253 | 0.40613 | 0.56625 | 0.38503 |
| O254 | 0.40158 | 0.55898 | 0.19034 |
| O255 | 0.27217 | 0.54046 | 0.22487 |
| O256 | 0.1396  | 0.32582 | 0.25391 |
| O257 | 0.19667 | 0.34596 | 0.42699 |
| O258 | 0.31494 | 0.3524  | 0.5124  |
| O259 | 0.42157 | 0.3322  | 0.401   |
| O260 | 0.39707 | 0.33124 | 0.20517 |
| O261 | 0.27199 | 0.34163 | 0.26329 |
| O262 | 0.19163 | 0.44486 | 0.29274 |
| O263 | 0.41492 | 0.44687 | 0.29934 |
| O264 | 0.07338 | 0.61876 | 0.07592 |
| O265 | 0.08815 | 0.48669 | 0.06804 |
| O266 | 0.11685 | 0.35682 | 0.06277 |
| O267 | 0.31467 | 0.62245 | 0.08127 |
| O268 | 0.33117 | 0.48945 | 0.06407 |
| O269 | 0.30321 | 0.35819 | 0.06892 |
| O270 | 0.51462 | 0.5343  | 0.27819 |
| O271 | 0.51695 | 0.36195 | 0.27322 |
| O272 | 0.44193 | 0.7464  | 0.64198 |
| O273 | 0.19747 | 0.74321 | 0.65782 |
| O274 | 0.27428 | 0.74639 | 0.05396 |
| O275 | 0.11204 | 0.74455 | 0.0537  |
| O276 | 0.06763 | 0.24532 | 0.13805 |
| O277 | 0.30805 | 0.23935 | 0.1492  |
| O278 | 0.23515 | 0.25015 | 0.55738 |
| O279 | 0.39637 | 0.24826 | 0.54985 |
| O280 | 0.56441 | 0.24966 | 0.35608 |
| O281 | 0.8011  | 0.23946 | 0.33286 |
| O282 | 0.72827 | 0.24108 | 0.95861 |



|                                        |          |         |         |
|----------------------------------------|----------|---------|---------|
| O283                                   | 0.88843  | 0.2424  | 0.94307 |
| O284                                   | 0.93792  | 0.74399 | 0.85974 |
| O285                                   | 0.69646  | 0.7486  | 0.85875 |
| O286                                   | 0.77073  | 0.74374 | 0.44022 |
| O287                                   | 0.60692  | 0.74721 | 0.45029 |
| O288                                   | 0.95552  | 0.2557  | 0.43853 |
| O289                                   | 0.88965  | 0.18403 | 0.56493 |
| O290                                   | 0.87212  | 0.31153 | 0.558   |
| O291                                   | 0.97793  | 0.25868 | 0.62587 |
| O292                                   | 0.08967  | 0.23153 | 0.57164 |
| O293                                   | 0.06081  | 0.34259 | 0.59437 |
| GA29                                   | 0.91884  | 0.40115 | 0.60766 |
| H295                                   | 0.93802  | 0.2866  | 0.38537 |
| H296                                   | 0.83005  | 0.33365 | 0.48697 |
| H297                                   | 0.85603  | 0.16675 | 0.51571 |
| H298                                   | 0.09156  | 0.57935 | 0.52163 |
| H299                                   | 0.06149  | 0.581   | 0.39832 |
| H300                                   | 0.97691  | 0.6213  | 0.54613 |
| H301                                   | -0.00057 | 0.37703 | 0.60864 |
| H302                                   | 0.88409  | 0.54633 | 0.51007 |
| H303                                   | 0.01617  | 0.39887 | 0.37682 |
| H304                                   | 0.11183  | 0.46818 | 0.42786 |
| H305                                   | 0.90351  | 0.44389 | 0.39698 |
| H306                                   | 0.06939  | 0.46028 | 0.54154 |
| AL30                                   | 0.81695  | 0.3225  | 0.307   |
| AL30                                   | 0.80458  | 0.47121 | 0.69682 |
| P309                                   | 0.92395  | 0.25281 | 0.54618 |
| C310                                   | 0.93439  | 0.53179 | 0.48845 |
| C311                                   | 0.05432  | 0.55678 | 0.47203 |
| C312                                   | 0.98568  | 0.57339 | 0.50846 |
| C313                                   | 0.0076   | 0.44556 | 0.41747 |
| C314                                   | 0.94537  | 0.46964 | 0.43189 |
| C315                                   | 0.06487  | 0.48076 | 0.46514 |
| C316                                   | 0.05766  | 0.28047 | 0.58981 |
| <b>C<sub>6</sub>H<sub>8</sub>+COOH</b> |          |         |         |
| SI2                                    | 0.42617  | 0.05373 | 0.64377 |
| SI3                                    | 0.30487  | 0.02213 | 0.78312 |
| SI4                                    | 0.28215  | 0.05209 | 0.00877 |
| SI5                                    | 0.12231  | 0.05794 | 0.01093 |
| SI6                                    | 0.07109  | 0.02453 | 0.79724 |
| SI7                                    | 0.17872  | 0.0529  | 0.64642 |
| SI8                                    | 0.42171  | 0.82195 | 0.67087 |
| SI9                                    | 0.30497  | 0.86394 | 0.80855 |

|      |         |         |         |
|------|---------|---------|---------|
| SI10 | 0.27006 | 0.82509 | 0.02958 |
| SI11 | 0.11542 | 0.82193 | 0.01793 |
| SI12 | 0.06576 | 0.86632 | 0.8026  |
| SI13 | 0.18216 | 0.82228 | 0.67419 |
| SI14 | 0.07753 | 0.93825 | 0.15026 |
| SI15 | 0.19904 | 0.96844 | 0.29424 |
| SI16 | 0.21858 | 0.93197 | 0.51406 |
| SI17 | 0.37781 | 0.93018 | 0.51512 |
| SI18 | 0.43204 | 0.96448 | 0.30575 |
| SI19 | 0.32301 | 0.93896 | 0.15542 |
| SI20 | 0.08298 | 0.16767 | 0.16353 |
| SI21 | 0.20119 | 0.12545 | 0.30577 |
| SI22 | 0.23419 | 0.17229 | 0.52228 |
| SI23 | 0.38945 | 0.17141 | 0.51007 |
| SI24 | 0.43864 | 0.12245 | 0.30076 |
| SI25 | 0.32301 | 0.15917 | 0.16586 |
| SI26 | 0.5803  | 0.55834 | 0.33599 |
| SI27 | 0.68749 | 0.53103 | 0.17746 |
| SI28 | 0.71576 | 0.55076 | 0.9592  |
| SI29 | 0.87373 | 0.55888 | 0.97267 |
| SI30 | 0.92843 | 0.52735 | 0.18233 |
| SI31 | 0.80815 | 0.55459 | 0.31059 |
| SI32 | 0.57842 | 0.32684 | 0.32316 |
| SI33 | 0.69569 | 0.37294 | 0.18414 |
| SI34 | 0.72861 | 0.32153 | 0.96978 |
| SI35 | 0.8827  | 0.32074 | 0.97945 |
| SI36 | 0.93624 | 0.36848 | 0.18704 |
| SI37 | 0.9255  | 0.43611 | 0.84607 |
| SI38 | 0.77709 | 0.43849 | 0.4738  |
| SI39 | 0.61803 | 0.43443 | 0.48065 |
| SI40 | 0.56433 | 0.4679  | 0.69782 |
| SI41 | 0.67702 | 0.42567 | 0.82388 |
| SI42 | 0.91792 | 0.66931 | 0.81943 |
| SI43 | 0.80305 | 0.63273 | 0.68173 |
| SI44 | 0.76491 | 0.66293 | 0.46368 |
| SI45 | 0.60993 | 0.6687  | 0.47921 |
| SI46 | 0.56448 | 0.62458 | 0.69788 |
| SI47 | 0.6847  | 0.67398 | 0.81235 |
| SI48 | 0.57745 | 0.93878 | 0.36491 |
| SI49 | 0.69572 | 0.96302 | 0.22159 |
| SI50 | 0.72179 | 0.93182 | 0.99889 |
| SI51 | 0.88156 | 0.92791 | 0.9971  |
| SI52 | 0.93299 | 0.96625 | 0.20652 |
| SI53 | 0.82269 | 0.9406  | 0.35862 |

|      |         |         |         |
|------|---------|---------|---------|
| SI54 | 0.58077 | 0.17108 | 0.33735 |
| SI55 | 0.69737 | 0.11856 | 0.20334 |
| SI56 | 0.73333 | 0.16196 | 0.98329 |
| SI57 | 0.88739 | 0.16687 | 0.98713 |
| SI58 | 0.93892 | 0.12391 | 0.19833 |
| SI59 | 0.82064 | 0.16277 | 0.32903 |
| SI60 | 0.92565 | 0.04817 | 0.85777 |
| SI61 | 0.80289 | 0.02052 | 0.71342 |
| SI62 | 0.78237 | 0.06122 | 0.49498 |
| SI63 | 0.6227  | 0.06707 | 0.4919  |
| SI64 | 0.5715  | 0.02437 | 0.70209 |
| SI65 | 0.67938 | 0.04711 | 0.85581 |
| SI66 | 0.92164 | 0.82243 | 0.84064 |
| SI67 | 0.8018  | 0.86367 | 0.69792 |
| SI68 | 0.76975 | 0.82033 | 0.4815  |
| SI69 | 0.61558 | 0.82242 | 0.49909 |
| SI70 | 0.56637 | 0.86675 | 0.70732 |
| SI71 | 0.68157 | 0.82695 | 0.8396  |
| SI72 | 0.42192 | 0.44376 | 0.64175 |
| SI73 | 0.30641 | 0.47124 | 0.79653 |
| SI74 | 0.28766 | 0.42847 | 0.01096 |
| SI75 | 0.13045 | 0.42935 | 0.01002 |
| SI76 | 0.07541 | 0.46653 | 0.80177 |
| SI77 | 0.18743 | 0.44611 | 0.65783 |
| SI78 | 0.42549 | 0.66735 | 0.65751 |
| SI79 | 0.30236 | 0.62617 | 0.79323 |
| SI80 | 0.27127 | 0.6703  | 0.00574 |
| SI81 | 0.1171  | 0.66832 | 0.00514 |
| SI82 | 0.0652  | 0.62431 | 0.79686 |
| SI83 | 0.18035 | 0.66367 | 0.66055 |
| SI84 | 0.07687 | 0.55054 | 0.1413  |
| SI85 | 0.20237 | 0.52617 | 0.2781  |
| SI86 | 0.22631 | 0.56361 | 0.50599 |
| SI87 | 0.38603 | 0.56557 | 0.50064 |
| SI88 | 0.43337 | 0.52609 | 0.28722 |
| SI89 | 0.32815 | 0.55329 | 0.13595 |
| SI90 | 0.08472 | 0.32311 | 0.16071 |
| SI91 | 0.19951 | 0.36502 | 0.30523 |
| SI92 | 0.23617 | 0.32992 | 0.52529 |
| SI93 | 0.39191 | 0.32542 | 0.50959 |
| SI94 | 0.43622 | 0.36802 | 0.29041 |
| SI95 | 0.31808 | 0.31648 | 0.16719 |
| O96  | 0.36176 | 0.05914 | 0.71691 |
| O97  | 0.30185 | 0.05741 | 0.89197 |

|      |         |         |         |
|------|---------|---------|---------|
| O98  | 0.20183 | 0.04508 | 0.02437 |
| O99  | 0.10261 | 0.06243 | 0.89386 |
| O100 | 0.10481 | 0.05498 | 0.69662 |
| O101 | 0.23226 | 0.03051 | 0.73116 |
| O102 | 0.36095 | 0.81962 | 0.75113 |
| O103 | 0.30732 | 0.84464 | 0.92592 |
| O104 | 0.19226 | 0.84882 | 0.02235 |
| O105 | 0.08742 | 0.82911 | 0.90513 |
| O106 | 0.10469 | 0.83203 | 0.70864 |
| O107 | 0.23082 | 0.84832 | 0.76392 |
| O108 | 0.32294 | 0.94287 | 0.79306 |
| O109 | 0.08678 | 0.9449  | 0.80789 |
| O110 | 0.43449 | 0.12319 | 0.58101 |
| O111 | 0.41876 | 0.99214 | 0.56468 |
| O112 | 0.39823 | 0.8606  | 0.56992 |
| O113 | 0.19445 | 0.12776 | 0.60461 |
| O114 | 0.17913 | 0.99751 | 0.55692 |
| O115 | 0.19622 | 0.86371 | 0.57167 |
| O116 | 0.99135 | 0.03757 | 0.78876 |
| O117 | 0.98556 | 0.85884 | 0.7875  |
| O118 | 0.14317 | 0.93709 | 0.22063 |
| O119 | 0.20001 | 0.92423 | 0.39646 |
| O120 | 0.29834 | 0.94411 | 0.52886 |
| O121 | 0.39698 | 0.92399 | 0.39768 |
| O122 | 0.39812 | 0.94211 | 0.20063 |
| O123 | 0.27182 | 0.96525 | 0.24125 |
| O124 | 0.14662 | 0.16367 | 0.23742 |
| O125 | 0.20026 | 0.16217 | 0.4134  |
| O126 | 0.31169 | 0.14758 | 0.51852 |
| O127 | 0.41357 | 0.16775 | 0.39452 |
| O128 | 0.40014 | 0.14692 | 0.19995 |
| O129 | 0.27481 | 0.1318  | 0.25531 |
| O130 | 0.18168 | 0.04662 | 0.31861 |
| O131 | 0.42157 | 0.04443 | 0.32493 |
| O132 | 0.07027 | 0.86601 | 0.09447 |
| O133 | 0.0823  | 0.99691 | 0.06539 |
| O134 | 0.10029 | 0.12919 | 0.05969 |
| O135 | 0.30611 | 0.86225 | 0.12301 |
| O136 | 0.31806 | 0.9863  | 0.05661 |
| O137 | 0.30842 | 0.11988 | 0.06236 |
| O138 | 0.51087 | 0.94681 | 0.29723 |
| O139 | 0.51847 | 0.13222 | 0.28408 |
| O140 | 0.63832 | 0.57055 | 0.2538  |
| O141 | 0.67791 | 0.56096 | 0.06588 |

|      |         |         |         |
|------|---------|---------|---------|
| O142 | 0.79543 | 0.53902 | 0.9763  |
| O143 | 0.90339 | 0.56828 | 0.08444 |
| O144 | 0.88601 | 0.55489 | 0.27726 |
| O145 | 0.7643  | 0.54609 | 0.20995 |
| O146 | 0.64361 | 0.33    | 0.25258 |
| O147 | 0.69095 | 0.34318 | 0.07159 |
| O148 | 0.80623 | 0.34755 | 0.97062 |
| O149 | 0.90756 | 0.32435 | 0.09451 |
| O150 | 0.90509 | 0.33758 | 0.29011 |
| O151 | 0.76996 | 0.36552 | 0.22843 |
| O152 | 0.67135 | 0.45117 | 0.18328 |
| O153 | 0.91621 | 0.44684 | 0.16914 |
| O154 | 0.5673  | 0.62852 | 0.39497 |
| O155 | 0.6011  | 0.50121 | 0.41647 |
| O156 | 0.58978 | 0.36747 | 0.42686 |
| O157 | 0.7934  | 0.62549 | 0.36524 |
| O158 | 0.7907  | 0.49191 | 0.38494 |
| O159 | 0.80692 | 0.36336 | 0.43499 |
| O160 | 0.00722 | 0.54287 | 0.202   |
| O161 | 0.01719 | 0.36269 | 0.19211 |
| O162 | 0.8701  | 0.43224 | 0.75967 |
| O163 | 0.81842 | 0.45428 | 0.57312 |
| O164 | 0.69838 | 0.429   | 0.49173 |
| O165 | 0.58316 | 0.43806 | 0.58877 |
| O166 | 0.59934 | 0.42558 | 0.78628 |
| O167 | 0.72619 | 0.43764 | 0.73177 |
| O168 | 0.86554 | 0.67619 | 0.72753 |
| O169 | 0.80801 | 0.63875 | 0.55992 |
| O170 | 0.68691 | 0.64222 | 0.47945 |
| O171 | 0.57733 | 0.65563 | 0.58771 |
| O172 | 0.60666 | 0.66648 | 0.7803  |
| O173 | 0.73221 | 0.66839 | 0.71378 |
| O174 | 0.80712 | 0.55716 | 0.72076 |
| O175 | 0.587   | 0.54645 | 0.70266 |
| O176 | 0.93087 | 0.36592 | 0.90862 |
| O177 | 0.91634 | 0.49839 | 0.92222 |
| O178 | 0.88512 | 0.62853 | 0.91225 |
| O179 | 0.68943 | 0.35253 | 0.87535 |
| O180 | 0.68456 | 0.48441 | 0.9084  |
| O181 | 0.70456 | 0.61833 | 0.89454 |
| O182 | 0.48404 | 0.4618  | 0.71412 |
| O183 | 0.48503 | 0.63248 | 0.7224  |
| O184 | 0.64101 | 0.9259  | 0.29189 |
| O185 | 0.70035 | 0.92485 | 0.11504 |

|      |         |         |         |
|------|---------|---------|---------|
| O186 | 0.802   | 0.94187 | 0.98536 |
| O187 | 0.90141 | 0.92364 | 0.11433 |
| O188 | 0.89709 | 0.94539 | 0.31081 |
| O189 | 0.76897 | 0.96001 | 0.2728  |
| O190 | 0.64608 | 0.16474 | 0.2664  |
| O191 | 0.69825 | 0.14551 | 0.08959 |
| O192 | 0.81127 | 0.13787 | 0.98829 |
| O193 | 0.91717 | 0.16648 | 0.09995 |
| O194 | 0.898   | 0.15089 | 0.29507 |
| O195 | 0.77179 | 0.12246 | 0.25267 |
| O196 | 0.67294 | 0.04077 | 0.20615 |
| O197 | 0.92159 | 0.04522 | 0.18093 |
| O198 | 0.56817 | 0.87436 | 0.43819 |
| O199 | 0.58671 | 0.00556 | 0.43348 |
| O200 | 0.59623 | 0.138   | 0.4466  |
| O201 | 0.81048 | 0.86525 | 0.40057 |
| O202 | 0.81678 | 0.99402 | 0.45036 |
| O203 | 0.81506 | 0.12857 | 0.44249 |
| O204 | 0.01214 | 0.95045 | 0.21944 |
| O205 | 0.01847 | 0.13387 | 0.21824 |
| O206 | 0.86058 | 0.0496  | 0.78604 |
| O207 | 0.80008 | 0.06687 | 0.61294 |
| O208 | 0.70289 | 0.06046 | 0.47405 |
| O209 | 0.60608 | 0.06547 | 0.61033 |
| O210 | 0.60492 | 0.04593 | 0.80793 |
| O211 | 0.73128 | 0.02369 | 0.76922 |
| O212 | 0.85787 | 0.82995 | 0.76798 |
| O213 | 0.80465 | 0.82619 | 0.59065 |
| O214 | 0.69298 | 0.84749 | 0.48961 |
| O215 | 0.59292 | 0.82014 | 0.61558 |
| O216 | 0.60423 | 0.84325 | 0.80915 |
| O217 | 0.72858 | 0.85488 | 0.74885 |
| O218 | 0.81807 | 0.94317 | 0.6825  |
| O219 | 0.5831  | 0.94473 | 0.68129 |
| O220 | 0.933   | 0.11998 | 0.91483 |
| O221 | 0.92127 | 0.98865 | 0.94101 |
| O222 | 0.90403 | 0.85689 | 0.9477  |
| O223 | 0.69552 | 0.12263 | 0.89358 |
| O224 | 0.68369 | 0.99632 | 0.95073 |
| O225 | 0.69921 | 0.86331 | 0.94423 |
| O226 | 0.4926  | 0.042   | 0.71069 |
| O227 | 0.48611 | 0.85834 | 0.72183 |
| O228 | 0.3548  | 0.44315 | 0.70938 |
| O229 | 0.3127  | 0.42419 | 0.89545 |

|      |         |         |         |
|------|---------|---------|---------|
| O230 | 0.20899 | 0.44902 | 0.01704 |
| O231 | 0.10807 | 0.42481 | 0.89376 |
| O232 | 0.10985 | 0.44676 | 0.69536 |
| O233 | 0.23019 | 0.46743 | 0.75576 |
| O234 | 0.35578 | 0.65824 | 0.71694 |
| O235 | 0.29966 | 0.67316 | 0.89208 |
| O236 | 0.19454 | 0.64267 | 0.00653 |
| O237 | 0.08987 | 0.66996 | 0.89068 |
| O238 | 0.1035  | 0.64901 | 0.69539 |
| O239 | 0.229   | 0.62637 | 0.7408  |
| O240 | 0.32278 | 0.54953 | 0.82375 |
| O241 | 0.08313 | 0.5465  | 0.82241 |
| O242 | 0.43268 | 0.37088 | 0.5897  |
| O243 | 0.41702 | 0.49874 | 0.55214 |
| O244 | 0.41933 | 0.63263 | 0.548   |
| O245 | 0.20818 | 0.37193 | 0.62004 |
| O246 | 0.19776 | 0.49916 | 0.56699 |
| O247 | 0.19328 | 0.63246 | 0.54976 |
| O248 | 0.99759 | 0.44539 | 0.78946 |
| O249 | 0.98543 | 0.63192 | 0.77919 |
| O250 | 0.13746 | 0.55695 | 0.22158 |
| O251 | 0.20619 | 0.5579  | 0.38936 |
| O252 | 0.30628 | 0.56663 | 0.5201  |
| O253 | 0.4025  | 0.56525 | 0.38286 |
| O254 | 0.40068 | 0.55931 | 0.18828 |
| O255 | 0.27    | 0.54635 | 0.21979 |
| O256 | 0.13639 | 0.32756 | 0.25382 |
| O257 | 0.1964  | 0.35025 | 0.42389 |
| O258 | 0.31424 | 0.3493  | 0.50754 |
| O259 | 0.4219  | 0.33264 | 0.3977  |
| O260 | 0.3943  | 0.33156 | 0.20167 |
| O261 | 0.26922 | 0.33696 | 0.25951 |
| O262 | 0.1946  | 0.44509 | 0.28324 |
| O263 | 0.41465 | 0.4467  | 0.29576 |
| O264 | 0.07275 | 0.61806 | 0.07327 |
| O265 | 0.08693 | 0.48598 | 0.06812 |
| O266 | 0.11755 | 0.35628 | 0.06084 |
| O267 | 0.31734 | 0.62072 | 0.07117 |
| O268 | 0.33003 | 0.4868  | 0.06619 |
| O269 | 0.29967 | 0.35666 | 0.06514 |
| O270 | 0.51313 | 0.53564 | 0.27832 |
| O271 | 0.51495 | 0.35941 | 0.26388 |
| O272 | 0.44124 | 0.74606 | 0.63947 |
| O273 | 0.19584 | 0.74329 | 0.65353 |

|      |         |         |         |
|------|---------|---------|---------|
| O274 | 0.2749  | 0.74528 | 0.05209 |
| O275 | 0.11153 | 0.74361 | 0.05114 |
| O276 | 0.06741 | 0.24537 | 0.13613 |
| O277 | 0.30898 | 0.23756 | 0.14304 |
| O278 | 0.22862 | 0.25082 | 0.55279 |
| O279 | 0.39796 | 0.24827 | 0.54743 |
| O280 | 0.56259 | 0.24942 | 0.35327 |
| O281 | 0.80375 | 0.24066 | 0.33799 |
| O282 | 0.72819 | 0.24067 | 0.95871 |
| O283 | 0.88928 | 0.24287 | 0.94323 |
| O284 | 0.93796 | 0.74378 | 0.8597  |
| O285 | 0.69392 | 0.74801 | 0.86086 |
| O286 | 0.772   | 0.7431  | 0.44445 |
| O287 | 0.60715 | 0.74804 | 0.45185 |
| O288 | 0.96895 | 0.26006 | 0.42795 |
| O289 | 0.91617 | 0.17585 | 0.5492  |
| O290 | 0.88113 | 0.30127 | 0.55416 |
| O291 | 0.99211 | 0.25417 | 0.61775 |
| O292 | 0.07477 | 0.31947 | 0.54669 |
| O293 | 0.08024 | 0.28567 | 0.70744 |
| GA29 | 0.94601 | 0.4192  | 0.60598 |
| H295 | 0.94777 | 0.29206 | 0.37822 |
| H296 | 0.83496 | 0.33726 | 0.4889  |
| H297 | 0.87616 | 0.1586  | 0.51149 |
| H298 | 0.09102 | 0.58284 | 0.51748 |
| H299 | 0.0622  | 0.58624 | 0.39358 |
| H300 | 0.97588 | 0.62316 | 0.54193 |
| H301 | 0.05133 | 0.26037 | 0.75308 |
| H302 | 0.88382 | 0.54751 | 0.50089 |
| H303 | 0.0186  | 0.40371 | 0.36553 |
| H304 | 0.11304 | 0.47324 | 0.42015 |
| H305 | 0.90454 | 0.44705 | 0.38688 |
| H306 | 0.06999 | 0.46292 | 0.5323  |
| AL30 | 0.81901 | 0.32409 | 0.31284 |
| AL30 | 0.8021  | 0.47152 | 0.70008 |
| P309 | 0.93495 | 0.2507  | 0.53192 |
| C310 | 0.93449 | 0.53472 | 0.47863 |
| C311 | 0.05447 | 0.56083 | 0.46628 |
| C312 | 0.98535 | 0.57625 | 0.50192 |
| C313 | 0.00906 | 0.45013 | 0.40629 |
| C314 | 0.94652 | 0.47377 | 0.41956 |
| C315 | 0.06557 | 0.48503 | 0.45647 |
| C316 | 0.05193 | 0.28957 | 0.61709 |



# TS<sub>CO+OH</sub>

|      |         |         |         |
|------|---------|---------|---------|
| SI2  | 0.42637 | 0.05374 | 0.64305 |
| SI3  | 0.3048  | 0.02308 | 0.78319 |
| SI4  | 0.2813  | 0.05448 | 0.00772 |
| SI5  | 0.12113 | 0.0582  | 0.00962 |
| SI6  | 0.07018 | 0.02473 | 0.79543 |
| SI7  | 0.17878 | 0.05353 | 0.64604 |
| SI8  | 0.42161 | 0.82263 | 0.6693  |
| SI9  | 0.30463 | 0.86466 | 0.80777 |
| SI10 | 0.26928 | 0.82573 | 0.02819 |
| SI11 | 0.11471 | 0.82183 | 0.01562 |
| SI12 | 0.06495 | 0.86654 | 0.80072 |
| SI13 | 0.18192 | 0.82326 | 0.67292 |
| SI14 | 0.07779 | 0.93743 | 0.14891 |
| SI15 | 0.19838 | 0.96835 | 0.29309 |
| SI16 | 0.21854 | 0.93301 | 0.51304 |
| SI17 | 0.37776 | 0.93062 | 0.51352 |
| SI18 | 0.4314  | 0.96463 | 0.30347 |
| SI19 | 0.32184 | 0.94057 | 0.15367 |
| SI20 | 0.08103 | 0.16731 | 0.16324 |
| SI21 | 0.19971 | 0.12497 | 0.30441 |
| SI22 | 0.23428 | 0.17126 | 0.52046 |
| SI23 | 0.38938 | 0.17116 | 0.50929 |
| SI24 | 0.43904 | 0.12278 | 0.30002 |
| SI25 | 0.32221 | 0.15984 | 0.1666  |
| SI26 | 0.58038 | 0.55553 | 0.34077 |
| SI27 | 0.69023 | 0.52869 | 0.18342 |
| SI28 | 0.71585 | 0.5526  | 0.9669  |
| SI29 | 0.87437 | 0.55936 | 0.9741  |
| SI30 | 0.93104 | 0.52621 | 0.18251 |
| SI31 | 0.81214 | 0.55248 | 0.31508 |
| SI32 | 0.58117 | 0.32594 | 0.32794 |
| SI33 | 0.69806 | 0.37093 | 0.18677 |
| SI34 | 0.73066 | 0.31993 | 0.97309 |
| SI35 | 0.88483 | 0.31942 | 0.98224 |
| SI36 | 0.93781 | 0.36865 | 0.18933 |
| SI37 | 0.92682 | 0.43461 | 0.84563 |
| SI38 | 0.77734 | 0.43599 | 0.47609 |
| SI39 | 0.61807 | 0.43285 | 0.48728 |
| SI40 | 0.5647  | 0.46673 | 0.70297 |
| SI41 | 0.67777 | 0.42743 | 0.83242 |
| SI42 | 0.91977 | 0.66893 | 0.82072 |
| SI43 | 0.80441 | 0.63257 | 0.68399 |

|      |         |         |         |
|------|---------|---------|---------|
| SI44 | 0.76614 | 0.66211 | 0.46398 |
| SI45 | 0.61132 | 0.66736 | 0.47975 |
| SI46 | 0.56507 | 0.62412 | 0.69852 |
| SI47 | 0.68465 | 0.67338 | 0.81585 |
| SI48 | 0.57538 | 0.93784 | 0.36336 |
| SI49 | 0.6947  | 0.96381 | 0.22049 |
| SI50 | 0.72007 | 0.93224 | 0.99908 |
| SI51 | 0.88011 | 0.92757 | 0.9934  |
| SI52 | 0.93346 | 0.96477 | 0.20299 |
| SI53 | 0.82269 | 0.93902 | 0.3537  |
| SI54 | 0.58204 | 0.1706  | 0.33494 |
| SI55 | 0.69819 | 0.11933 | 0.20067 |
| SI56 | 0.73438 | 0.16095 | 0.98013 |
| SI57 | 0.88794 | 0.16574 | 0.98724 |
| SI58 | 0.93739 | 0.1226  | 0.1998  |
| SI59 | 0.81999 | 0.16225 | 0.33188 |
| SI60 | 0.92459 | 0.04872 | 0.85397 |
| SI61 | 0.80252 | 0.01854 | 0.7124  |
| SI62 | 0.77999 | 0.05686 | 0.49046 |
| SI63 | 0.62182 | 0.06369 | 0.48865 |
| SI64 | 0.57208 | 0.02421 | 0.69961 |
| SI65 | 0.67957 | 0.04614 | 0.85477 |
| SI66 | 0.92135 | 0.82137 | 0.83753 |
| SI67 | 0.80269 | 0.86184 | 0.69586 |
| SI68 | 0.7689  | 0.81989 | 0.47806 |
| SI69 | 0.61496 | 0.82131 | 0.49628 |
| SI70 | 0.56642 | 0.86667 | 0.70462 |
| SI71 | 0.68166 | 0.82698 | 0.83796 |
| SI72 | 0.42318 | 0.44366 | 0.64399 |
| SI73 | 0.30634 | 0.4715  | 0.79661 |
| SI74 | 0.29075 | 0.42843 | 0.01125 |
| SI75 | 0.13278 | 0.42888 | 0.01209 |
| SI76 | 0.07648 | 0.46687 | 0.80434 |
| SI77 | 0.18972 | 0.44497 | 0.65586 |
| SI78 | 0.42545 | 0.66762 | 0.65761 |
| SI79 | 0.30185 | 0.62701 | 0.79403 |
| SI80 | 0.27156 | 0.67096 | 0.00738 |
| SI81 | 0.11784 | 0.668   | 0.00412 |
| SI82 | 0.06701 | 0.62493 | 0.79344 |
| SI83 | 0.18111 | 0.6652  | 0.65854 |
| SI84 | 0.07875 | 0.55127 | 0.14134 |
| SI85 | 0.20347 | 0.52628 | 0.27716 |
| SI86 | 0.22769 | 0.56306 | 0.50574 |
| SI87 | 0.38744 | 0.56429 | 0.50188 |

|      |         |         |         |
|------|---------|---------|---------|
| SI88 | 0.43463 | 0.52573 | 0.28738 |
| SI89 | 0.32983 | 0.55357 | 0.13548 |
| SI90 | 0.08473 | 0.32256 | 0.16085 |
| SI91 | 0.20042 | 0.36562 | 0.30281 |
| SI92 | 0.23764 | 0.3291  | 0.5219  |
| SI93 | 0.39241 | 0.32563 | 0.51122 |
| SI94 | 0.43874 | 0.36803 | 0.29281 |
| SI95 | 0.32124 | 0.31732 | 0.16905 |
| O96  | 0.36214 | 0.05907 | 0.71658 |
| O97  | 0.30169 | 0.05978 | 0.89108 |
| O98  | 0.20107 | 0.04765 | 0.02297 |
| O99  | 0.1015  | 0.062   | 0.89267 |
| O100 | 0.10484 | 0.05485 | 0.6953  |
| O101 | 0.23238 | 0.03088 | 0.73056 |
| O102 | 0.36052 | 0.821   | 0.74898 |
| O103 | 0.30723 | 0.84365 | 0.92451 |
| O104 | 0.1915  | 0.84893 | 0.01887 |
| O105 | 0.086   | 0.82895 | 0.90336 |
| O106 | 0.10438 | 0.8313  | 0.70772 |
| O107 | 0.2305  | 0.84919 | 0.76278 |
| O108 | 0.32239 | 0.9438  | 0.79514 |
| O109 | 0.08638 | 0.94491 | 0.80552 |
| O110 | 0.43436 | 0.12366 | 0.5811  |
| O111 | 0.41847 | 0.99263 | 0.5633  |
| O112 | 0.39879 | 0.8609  | 0.5677  |
| O113 | 0.19515 | 0.12857 | 0.60507 |
| O114 | 0.17996 | 0.99921 | 0.55505 |
| O115 | 0.19516 | 0.86528 | 0.57098 |
| O116 | 0.99059 | 0.03719 | 0.78576 |
| O117 | 0.98479 | 0.85927 | 0.78536 |
| O118 | 0.14352 | 0.93561 | 0.21923 |
| O119 | 0.20006 | 0.92453 | 0.3956  |
| O120 | 0.29835 | 0.94405 | 0.52851 |
| O121 | 0.39606 | 0.92468 | 0.3958  |
| O122 | 0.39699 | 0.94311 | 0.19839 |
| O123 | 0.2713  | 0.96654 | 0.24047 |
| O124 | 0.14542 | 0.1635  | 0.23621 |
| O125 | 0.1992  | 0.1613  | 0.41258 |
| O126 | 0.31173 | 0.14665 | 0.5157  |
| O127 | 0.41452 | 0.16811 | 0.39432 |
| O128 | 0.39933 | 0.14744 | 0.20029 |
| O129 | 0.27363 | 0.13127 | 0.25473 |
| O130 | 0.17976 | 0.04628 | 0.31703 |
| O131 | 0.42215 | 0.04466 | 0.32354 |

|      |         |         |         |
|------|---------|---------|---------|
| O132 | 0.06998 | 0.86511 | 0.09339 |
| O133 | 0.08318 | 0.99575 | 0.06381 |
| O134 | 0.09757 | 0.12854 | 0.05946 |
| O135 | 0.30451 | 0.86396 | 0.12115 |
| O136 | 0.31683 | 0.9884  | 0.05547 |
| O137 | 0.30771 | 0.12225 | 0.06167 |
| O138 | 0.50962 | 0.94481 | 0.29349 |
| O139 | 0.51865 | 0.13272 | 0.28261 |
| O140 | 0.64204 | 0.56531 | 0.26433 |
| O141 | 0.67973 | 0.56329 | 0.07471 |
| O142 | 0.79583 | 0.54195 | 0.98135 |
| O143 | 0.90679 | 0.56779 | 0.08435 |
| O144 | 0.88979 | 0.55139 | 0.28012 |
| O145 | 0.76736 | 0.54252 | 0.21547 |
| O146 | 0.64567 | 0.32957 | 0.2568  |
| O147 | 0.69276 | 0.33809 | 0.0761  |
| O148 | 0.80811 | 0.34655 | 0.97539 |
| O149 | 0.91251 | 0.32302 | 0.0956  |
| O150 | 0.9049  | 0.34316 | 0.29173 |
| O151 | 0.77192 | 0.36555 | 0.23113 |
| O152 | 0.67312 | 0.44914 | 0.18107 |
| O153 | 0.91989 | 0.44678 | 0.16292 |
| O154 | 0.56741 | 0.62636 | 0.39793 |
| O155 | 0.59438 | 0.49776 | 0.42351 |
| O156 | 0.59486 | 0.36395 | 0.43343 |
| O157 | 0.79747 | 0.62422 | 0.36779 |
| O158 | 0.79464 | 0.49183 | 0.39248 |
| O159 | 0.80251 | 0.36093 | 0.43757 |
| O160 | 0.00986 | 0.54246 | 0.20315 |
| O161 | 0.01946 | 0.36361 | 0.19686 |
| O162 | 0.87427 | 0.42834 | 0.7528  |
| O163 | 0.81991 | 0.44808 | 0.5778  |
| O164 | 0.69853 | 0.43535 | 0.49853 |
| O165 | 0.5838  | 0.43354 | 0.59618 |
| O166 | 0.60024 | 0.42769 | 0.79409 |
| O167 | 0.7275  | 0.44046 | 0.74096 |
| O168 | 0.86715 | 0.6756  | 0.72925 |
| O169 | 0.80787 | 0.64021 | 0.56266 |
| O170 | 0.68814 | 0.6403  | 0.47817 |
| O171 | 0.57982 | 0.65568 | 0.58939 |
| O172 | 0.60694 | 0.66478 | 0.78252 |
| O173 | 0.73326 | 0.66586 | 0.71887 |
| O174 | 0.81101 | 0.55635 | 0.72039 |
| O175 | 0.58623 | 0.54559 | 0.70224 |

|      |         |         |         |
|------|---------|---------|---------|
| O176 | 0.93121 | 0.36608 | 0.91002 |
| O177 | 0.9123  | 0.49826 | 0.91671 |
| O178 | 0.88698 | 0.62903 | 0.91426 |
| O179 | 0.69082 | 0.35402 | 0.88141 |
| O180 | 0.68472 | 0.48554 | 0.91786 |
| O181 | 0.70334 | 0.61923 | 0.9008  |
| O182 | 0.48421 | 0.4597  | 0.71927 |
| O183 | 0.48543 | 0.63275 | 0.72141 |
| O184 | 0.64059 | 0.92773 | 0.29303 |
| O185 | 0.69724 | 0.92437 | 0.11457 |
| O186 | 0.80041 | 0.94231 | 0.98787 |
| O187 | 0.90384 | 0.92271 | 0.10889 |
| O188 | 0.89692 | 0.94131 | 0.30535 |
| O189 | 0.76878 | 0.95981 | 0.2689  |
| O190 | 0.64583 | 0.16626 | 0.26109 |
| O191 | 0.69867 | 0.14463 | 0.08598 |
| O192 | 0.81192 | 0.13635 | 0.98594 |
| O193 | 0.91573 | 0.1652  | 0.1014  |
| O194 | 0.89702 | 0.14663 | 0.29843 |
| O195 | 0.77199 | 0.12345 | 0.2508  |
| O196 | 0.67274 | 0.04165 | 0.2049  |
| O197 | 0.92177 | 0.04376 | 0.17925 |
| O198 | 0.56692 | 0.87207 | 0.43432 |
| O199 | 0.57987 | 0.00422 | 0.43408 |
| O200 | 0.59965 | 0.13577 | 0.44219 |
| O201 | 0.80876 | 0.86382 | 0.39532 |
| O202 | 0.81955 | 0.99276 | 0.4452  |
| O203 | 0.80672 | 0.12782 | 0.44331 |
| O204 | 0.01268 | 0.94983 | 0.2182  |
| O205 | 0.01709 | 0.13393 | 0.21962 |
| O206 | 0.86018 | 0.05218 | 0.78074 |
| O207 | 0.79449 | 0.061   | 0.60941 |
| O208 | 0.70059 | 0.04915 | 0.46809 |
| O209 | 0.60652 | 0.06531 | 0.60772 |
| O210 | 0.6055  | 0.04555 | 0.80535 |
| O211 | 0.73183 | 0.01906 | 0.77118 |
| O212 | 0.85854 | 0.82438 | 0.76229 |
| O213 | 0.80419 | 0.82721 | 0.58652 |
| O214 | 0.69208 | 0.84685 | 0.4866  |
| O215 | 0.59199 | 0.81969 | 0.61271 |
| O216 | 0.60455 | 0.84301 | 0.80603 |
| O217 | 0.72947 | 0.85291 | 0.74693 |
| O218 | 0.82133 | 0.94108 | 0.68617 |
| O219 | 0.58322 | 0.94451 | 0.67826 |

|      |         |         |         |
|------|---------|---------|---------|
| O220 | 0.93351 | 0.11841 | 0.91566 |
| O221 | 0.91859 | 0.9874  | 0.93422 |
| O222 | 0.90031 | 0.85613 | 0.94276 |
| O223 | 0.69671 | 0.12197 | 0.88977 |
| O224 | 0.68182 | 0.99695 | 0.95181 |
| O225 | 0.69852 | 0.86424 | 0.94199 |
| O226 | 0.49311 | 0.04178 | 0.70891 |
| O227 | 0.48615 | 0.85855 | 0.72035 |
| O228 | 0.35414 | 0.44499 | 0.70791 |
| O229 | 0.31293 | 0.42367 | 0.89425 |
| O230 | 0.21166 | 0.4465  | 0.02086 |
| O231 | 0.11223 | 0.42693 | 0.89422 |
| O232 | 0.10985 | 0.43989 | 0.69522 |
| O233 | 0.22956 | 0.4659  | 0.75534 |
| O234 | 0.35625 | 0.65785 | 0.71843 |
| O235 | 0.29978 | 0.67327 | 0.89348 |
| O236 | 0.19521 | 0.64223 | 0.00796 |
| O237 | 0.09256 | 0.6684  | 0.88861 |
| O238 | 0.10375 | 0.65172 | 0.69206 |
| O239 | 0.22876 | 0.62805 | 0.74055 |
| O240 | 0.32032 | 0.54976 | 0.82463 |
| O241 | 0.08841 | 0.54654 | 0.81213 |
| O242 | 0.43245 | 0.37024 | 0.59303 |
| O243 | 0.42091 | 0.49896 | 0.55451 |
| O244 | 0.41818 | 0.6328  | 0.54819 |
| O245 | 0.20606 | 0.37032 | 0.61636 |
| O246 | 0.19624 | 0.49926 | 0.56722 |
| O247 | 0.19501 | 0.63198 | 0.54905 |
| O248 | 0.99954 | 0.44595 | 0.79191 |
| O249 | 0.98685 | 0.63006 | 0.78084 |
| O250 | 0.14005 | 0.55983 | 0.22032 |
| O251 | 0.20897 | 0.55757 | 0.38883 |
| O252 | 0.30745 | 0.56206 | 0.52259 |
| O253 | 0.40326 | 0.56376 | 0.38397 |
| O254 | 0.40189 | 0.55968 | 0.18893 |
| O255 | 0.27186 | 0.543   | 0.21881 |
| O256 | 0.13978 | 0.32537 | 0.25037 |
| O257 | 0.1964  | 0.34996 | 0.42202 |
| O258 | 0.31487 | 0.35127 | 0.50773 |
| O259 | 0.42324 | 0.33368 | 0.40046 |
| O260 | 0.39777 | 0.32947 | 0.20477 |
| O261 | 0.27232 | 0.342   | 0.25943 |
| O262 | 0.19173 | 0.44564 | 0.28314 |
| O263 | 0.41552 | 0.44634 | 0.29458 |

|      |         |         |         |
|------|---------|---------|---------|
| O264 | 0.07279 | 0.61784 | 0.07149 |
| O265 | 0.09012 | 0.48667 | 0.06853 |
| O266 | 0.1169  | 0.35589 | 0.05999 |
| O267 | 0.31777 | 0.62222 | 0.07412 |
| O268 | 0.33273 | 0.48892 | 0.06181 |
| O269 | 0.30608 | 0.35748 | 0.06565 |
| O270 | 0.51428 | 0.53566 | 0.27779 |
| O271 | 0.51798 | 0.361   | 0.27047 |
| O272 | 0.44048 | 0.74628 | 0.63897 |
| O273 | 0.19702 | 0.74454 | 0.65007 |
| O274 | 0.27432 | 0.7461  | 0.05284 |
| O275 | 0.11151 | 0.74338 | 0.04879 |
| O276 | 0.06623 | 0.24527 | 0.13605 |
| O277 | 0.30804 | 0.2388  | 0.14715 |
| O278 | 0.23014 | 0.25049 | 0.54956 |
| O279 | 0.39605 | 0.24818 | 0.54757 |
| O280 | 0.56318 | 0.24851 | 0.35494 |
| O281 | 0.80432 | 0.24037 | 0.3368  |
| O282 | 0.7298  | 0.23975 | 0.95512 |
| O283 | 0.89002 | 0.24203 | 0.94504 |
| O284 | 0.94082 | 0.74349 | 0.85907 |
| O285 | 0.69337 | 0.74816 | 0.86146 |
| O286 | 0.77142 | 0.74217 | 0.44304 |
| O287 | 0.60782 | 0.7463  | 0.45061 |
| O288 | 0.92614 | 0.2144  | 0.498   |
| O289 | 0.8383  | 0.19822 | 0.62452 |
| O290 | 0.86752 | 0.31648 | 0.57299 |
| O291 | 0.94919 | 0.25449 | 0.68158 |
| O292 | 0.04698 | 0.26477 | 0.50453 |
| O293 | 0.02649 | 0.36202 | 0.61563 |
| GA29 | 0.9219  | 0.39805 | 0.61244 |
| H295 | 0.97198 | 0.2284  | 0.48188 |
| H296 | 0.83075 | 0.33348 | 0.50141 |
| H297 | 0.8235  | 0.17284 | 0.56496 |
| H298 | 0.08704 | 0.60221 | 0.48391 |
| H299 | 0.04067 | 0.5937  | 0.37306 |
| H300 | 0.97297 | 0.6325  | 0.54125 |
| H301 | 0.05989 | 0.39741 | 0.65839 |
| H302 | 0.88657 | 0.54593 | 0.53928 |
| H303 | 0.01383 | 0.40937 | 0.37513 |
| H304 | 0.10665 | 0.48857 | 0.39705 |
| H305 | 0.90235 | 0.44389 | 0.4239  |
| H306 | 0.07968 | 0.48266 | 0.5212  |
| AL30 | 0.82151 | 0.32405 | 0.31641 |

|                                             |         |         |         |
|---------------------------------------------|---------|---------|---------|
| AL30                                        | 0.80274 | 0.47123 | 0.7028  |
| P309                                        | 0.8996  | 0.24516 | 0.601   |
| C310                                        | 0.93451 | 0.53661 | 0.50386 |
| C311                                        | 0.04639 | 0.57344 | 0.44953 |
| C312                                        | 0.98222 | 0.58423 | 0.5049  |
| C313                                        | 0.00614 | 0.45596 | 0.41657 |
| C314                                        | 0.94474 | 0.47378 | 0.44867 |
| C315                                        | 0.06396 | 0.49855 | 0.44556 |
| C316                                        | 0.0595  | 0.30823 | 0.56261 |
| <b>C<sub>6</sub>H<sub>8</sub>+Ga(OH)+CO</b> |         |         |         |
| SI2                                         | 0.42518 | 0.05473 | 0.64538 |
| SI3                                         | 0.30359 | 0.02331 | 0.78452 |
| SI4                                         | 0.28236 | 0.05544 | 0.01013 |
| SI5                                         | 0.12207 | 0.05908 | 0.01075 |
| SI6                                         | 0.07096 | 0.02577 | 0.79605 |
| SI7                                         | 0.17827 | 0.05367 | 0.64673 |
| SI8                                         | 0.42199 | 0.82251 | 0.66948 |
| SI9                                         | 0.30466 | 0.86446 | 0.80776 |
| SI10                                        | 0.26997 | 0.82549 | 0.02834 |
| SI11                                        | 0.11524 | 0.82298 | 0.01682 |
| SI12                                        | 0.06609 | 0.86739 | 0.80059 |
| SI13                                        | 0.1824  | 0.8215  | 0.673   |
| SI14                                        | 0.07804 | 0.93833 | 0.14997 |
| SI15                                        | 0.19869 | 0.96842 | 0.29474 |
| SI16                                        | 0.2186  | 0.93231 | 0.51466 |
| SI17                                        | 0.378   | 0.93168 | 0.51456 |
| SI18                                        | 0.43196 | 0.96527 | 0.30407 |
| SI19                                        | 0.32218 | 0.93998 | 0.15505 |
| SI20                                        | 0.08122 | 0.16768 | 0.16358 |
| SI21                                        | 0.20068 | 0.12528 | 0.30425 |
| SI22                                        | 0.235   | 0.1714  | 0.52035 |
| SI23                                        | 0.3895  | 0.17187 | 0.51142 |
| SI24                                        | 0.44039 | 0.12374 | 0.30187 |
| SI25                                        | 0.32347 | 0.16129 | 0.16795 |
| SI26                                        | 0.57742 | 0.55435 | 0.34394 |
| SI27                                        | 0.6918  | 0.52539 | 0.18967 |
| SI28                                        | 0.71164 | 0.55863 | 0.97794 |
| SI29                                        | 0.87122 | 0.56136 | 0.97184 |
| SI30                                        | 0.93461 | 0.52712 | 0.18042 |
| SI31                                        | 0.81768 | 0.55369 | 0.31457 |
| SI32                                        | 0.58025 | 0.32638 | 0.33446 |
| SI33                                        | 0.69956 | 0.36847 | 0.19208 |
| SI34                                        | 0.72917 | 0.31783 | 0.98074 |



|      |         |         |         |
|------|---------|---------|---------|
| SI35 | 0.88345 | 0.32108 | 0.98682 |
| SI36 | 0.94032 | 0.36908 | 0.19425 |
| SI37 | 0.92672 | 0.43529 | 0.84592 |
| SI38 | 0.7766  | 0.43971 | 0.46827 |
| SI39 | 0.61821 | 0.43574 | 0.48305 |
| SI40 | 0.57427 | 0.46926 | 0.7006  |
| SI41 | 0.68026 | 0.43009 | 0.847   |
| SI42 | 0.91946 | 0.6705  | 0.81874 |
| SI43 | 0.80454 | 0.62846 | 0.68661 |
| SI44 | 0.76645 | 0.66085 | 0.46571 |
| SI45 | 0.61128 | 0.66872 | 0.47596 |
| SI46 | 0.56501 | 0.62642 | 0.69434 |
| SI47 | 0.68176 | 0.67311 | 0.81708 |
| SI48 | 0.57636 | 0.93888 | 0.36285 |
| SI49 | 0.69663 | 0.96563 | 0.22175 |
| SI50 | 0.72157 | 0.93166 | 0.9987  |
| SI51 | 0.88143 | 0.92796 | 0.99565 |
| SI52 | 0.93313 | 0.96592 | 0.20545 |
| SI53 | 0.82356 | 0.93928 | 0.35837 |
| SI54 | 0.58407 | 0.17098 | 0.33662 |
| SI55 | 0.69839 | 0.12165 | 0.19774 |
| SI56 | 0.73406 | 0.16098 | 0.97834 |
| SI57 | 0.88731 | 0.16708 | 0.99085 |
| SI58 | 0.93796 | 0.12338 | 0.20217 |
| SI59 | 0.81973 | 0.16243 | 0.32991 |
| SI60 | 0.92557 | 0.04994 | 0.85856 |
| SI61 | 0.80419 | 0.01997 | 0.71374 |
| SI62 | 0.78142 | 0.05708 | 0.49313 |
| SI63 | 0.62235 | 0.06349 | 0.49219 |
| SI64 | 0.56986 | 0.02405 | 0.70131 |
| SI65 | 0.67985 | 0.04568 | 0.8529  |
| SI66 | 0.9226  | 0.8233  | 0.83837 |
| SI67 | 0.8033  | 0.86463 | 0.69649 |
| SI68 | 0.77024 | 0.81942 | 0.47966 |
| SI69 | 0.61621 | 0.82208 | 0.4953  |
| SI70 | 0.56697 | 0.8665  | 0.70418 |
| SI71 | 0.6827  | 0.82814 | 0.83769 |
| SI72 | 0.42821 | 0.44412 | 0.63795 |
| SI73 | 0.30796 | 0.46977 | 0.78801 |
| SI74 | 0.29012 | 0.42656 | 0.00459 |
| SI75 | 0.13214 | 0.42765 | 0.0048  |
| SI76 | 0.07831 | 0.47038 | 0.79976 |
| SI77 | 0.1847  | 0.4461  | 0.64602 |
| SI78 | 0.42455 | 0.66747 | 0.65401 |

|      |         |         |         |
|------|---------|---------|---------|
| SI79 | 0.30264 | 0.62538 | 0.79226 |
| SI80 | 0.27129 | 0.67003 | 0.00551 |
| SI81 | 0.11697 | 0.67031 | 0.9993  |
| SI82 | 0.06589 | 0.62676 | 0.79329 |
| SI83 | 0.181   | 0.66325 | 0.65765 |
| SI84 | 0.08096 | 0.55137 | 0.13254 |
| SI85 | 0.20343 | 0.52568 | 0.27389 |
| SI86 | 0.22664 | 0.5631  | 0.49853 |
| SI87 | 0.38674 | 0.56547 | 0.49699 |
| SI88 | 0.43496 | 0.52562 | 0.28315 |
| SI89 | 0.32904 | 0.55007 | 0.1319  |
| SI90 | 0.08533 | 0.32298 | 0.15671 |
| SI91 | 0.20222 | 0.36675 | 0.29805 |
| SI92 | 0.23506 | 0.32858 | 0.52134 |
| SI93 | 0.38968 | 0.32649 | 0.5093  |
| SI94 | 0.43759 | 0.36718 | 0.29087 |
| SI95 | 0.32281 | 0.31944 | 0.1632  |
| O96  | 0.36036 | 0.05978 | 0.71752 |
| O97  | 0.30179 | 0.05914 | 0.89305 |
| O98  | 0.20199 | 0.0504  | 0.0264  |
| O99  | 0.10338 | 0.06193 | 0.89331 |
| O100 | 0.10393 | 0.05685 | 0.69529 |
| O101 | 0.23082 | 0.03213 | 0.73334 |
| O102 | 0.36123 | 0.82134 | 0.74962 |
| O103 | 0.30758 | 0.84468 | 0.92488 |
| O104 | 0.19224 | 0.84943 | 0.02088 |
| O105 | 0.08674 | 0.83172 | 0.90468 |
| O106 | 0.10506 | 0.83101 | 0.7084  |
| O107 | 0.23089 | 0.84706 | 0.76328 |
| O108 | 0.32096 | 0.94385 | 0.79388 |
| O109 | 0.08709 | 0.94596 | 0.80302 |
| O110 | 0.4342  | 0.12538 | 0.58557 |
| O111 | 0.41786 | 0.99448 | 0.56393 |
| O112 | 0.39971 | 0.86226 | 0.56889 |
| O113 | 0.19509 | 0.12767 | 0.60304 |
| O114 | 0.17918 | 0.9975  | 0.55837 |
| O115 | 0.19629 | 0.86387 | 0.57146 |
| O116 | 0.99109 | 0.03903 | 0.78936 |
| O117 | 0.98584 | 0.86052 | 0.78505 |
| O118 | 0.14315 | 0.93649 | 0.22126 |
| O119 | 0.19963 | 0.92472 | 0.39728 |
| O120 | 0.29839 | 0.94426 | 0.52909 |
| O121 | 0.39695 | 0.92581 | 0.39704 |
| O122 | 0.39741 | 0.94289 | 0.19956 |

|      |         |         |         |
|------|---------|---------|---------|
| O123 | 0.27156 | 0.96509 | 0.24229 |
| O124 | 0.14603 | 0.16324 | 0.23562 |
| O125 | 0.19987 | 0.16223 | 0.41194 |
| O126 | 0.31222 | 0.14575 | 0.51523 |
| O127 | 0.41675 | 0.16783 | 0.39762 |
| O128 | 0.40062 | 0.14998 | 0.20299 |
| O129 | 0.27454 | 0.13098 | 0.25442 |
| O130 | 0.18092 | 0.04662 | 0.31822 |
| O131 | 0.42296 | 0.04542 | 0.3227  |
| O132 | 0.07027 | 0.86598 | 0.0948  |
| O133 | 0.0843  | 0.99632 | 0.06449 |
| O134 | 0.09644 | 0.12909 | 0.05921 |
| O135 | 0.30567 | 0.86337 | 0.12141 |
| O136 | 0.31667 | 0.9888  | 0.05804 |
| O137 | 0.31067 | 0.12309 | 0.06266 |
| O138 | 0.51032 | 0.94584 | 0.29381 |
| O139 | 0.52032 | 0.13316 | 0.28529 |
| O140 | 0.64532 | 0.55387 | 0.27914 |
| O141 | 0.67715 | 0.56726 | 0.08748 |
| O142 | 0.79225 | 0.55612 | 0.99127 |
| O143 | 0.91236 | 0.56162 | 0.07554 |
| O144 | 0.8937  | 0.5602  | 0.27311 |
| O145 | 0.76929 | 0.53906 | 0.21991 |
| O146 | 0.64719 | 0.33336 | 0.26905 |
| O147 | 0.69421 | 0.3256  | 0.08896 |
| O148 | 0.80615 | 0.34682 | 0.98156 |
| O149 | 0.91389 | 0.32605 | 0.09801 |
| O150 | 0.90792 | 0.33996 | 0.29485 |
| O151 | 0.77414 | 0.36587 | 0.23446 |
| O152 | 0.67681 | 0.44617 | 0.17208 |
| O153 | 0.92073 | 0.44729 | 0.17345 |
| O154 | 0.56788 | 0.62851 | 0.39272 |
| O155 | 0.57909 | 0.49946 | 0.43446 |
| O156 | 0.58883 | 0.36544 | 0.44057 |
| O157 | 0.79845 | 0.62371 | 0.36935 |
| O158 | 0.81189 | 0.49099 | 0.39181 |
| O159 | 0.80174 | 0.36158 | 0.43669 |
| O160 | 0.01361 | 0.54255 | 0.19844 |
| O161 | 0.02185 | 0.36412 | 0.20004 |
| O162 | 0.88088 | 0.4195  | 0.74283 |
| O163 | 0.80325 | 0.44732 | 0.57903 |
| O164 | 0.69667 | 0.44316 | 0.45423 |
| O165 | 0.60766 | 0.43509 | 0.60237 |
| O166 | 0.60559 | 0.43476 | 0.79883 |

|      |         |         |         |
|------|---------|---------|---------|
| O167 | 0.738   | 0.43682 | 0.76556 |
| O168 | 0.86413 | 0.67659 | 0.73053 |
| O169 | 0.80547 | 0.63664 | 0.56545 |
| O170 | 0.68778 | 0.64083 | 0.47625 |
| O171 | 0.5786  | 0.65799 | 0.58492 |
| O172 | 0.60479 | 0.66973 | 0.77813 |
| O173 | 0.73179 | 0.65552 | 0.72507 |
| O174 | 0.81807 | 0.55271 | 0.72245 |
| O175 | 0.59084 | 0.54934 | 0.69896 |
| O176 | 0.92875 | 0.3671  | 0.91118 |
| O177 | 0.89394 | 0.4966  | 0.90481 |
| O178 | 0.88948 | 0.63004 | 0.9137  |
| O179 | 0.6845  | 0.35665 | 0.89919 |
| O180 | 0.6858  | 0.48853 | 0.93171 |
| O181 | 0.69151 | 0.62264 | 0.9102  |
| O182 | 0.49412 | 0.45798 | 0.70416 |
| O183 | 0.48496 | 0.63141 | 0.7159  |
| O184 | 0.64126 | 0.92917 | 0.29162 |
| O185 | 0.70114 | 0.92662 | 0.11553 |
| O186 | 0.80174 | 0.94094 | 0.98425 |
| O187 | 0.90194 | 0.92357 | 0.11256 |
| O188 | 0.89754 | 0.9435  | 0.30927 |
| O189 | 0.76938 | 0.96226 | 0.27494 |
| O190 | 0.64685 | 0.16819 | 0.2603  |
| O191 | 0.69556 | 0.1453  | 0.08224 |
| O192 | 0.81162 | 0.1368  | 0.98898 |
| O193 | 0.91556 | 0.16639 | 0.10452 |
| O194 | 0.89808 | 0.14792 | 0.30131 |
| O195 | 0.77375 | 0.12842 | 0.24197 |
| O196 | 0.67482 | 0.0435  | 0.20587 |
| O197 | 0.92101 | 0.04485 | 0.18144 |
| O198 | 0.56839 | 0.87318 | 0.43385 |
| O199 | 0.58157 | 0.00495 | 0.43399 |
| O200 | 0.60471 | 0.13554 | 0.44215 |
| O201 | 0.81044 | 0.86304 | 0.39648 |
| O202 | 0.81994 | 0.99057 | 0.4536  |
| O203 | 0.80411 | 0.12472 | 0.43638 |
| O204 | 0.01244 | 0.95116 | 0.21829 |
| O205 | 0.01774 | 0.13382 | 0.22108 |
| O206 | 0.86042 | 0.05245 | 0.7857  |
| O207 | 0.80126 | 0.06788 | 0.61245 |
| O208 | 0.70158 | 0.04626 | 0.48269 |
| O209 | 0.60182 | 0.06681 | 0.60926 |
| O210 | 0.60518 | 0.04487 | 0.80611 |

|      |         |         |          |
|------|---------|---------|----------|
| O211 | 0.73154 | 0.02093 | 0.76617  |
| O212 | 0.85889 | 0.82917 | 0.76524  |
| O213 | 0.80461 | 0.82812 | 0.58875  |
| O214 | 0.6936  | 0.84701 | 0.48635  |
| O215 | 0.59341 | 0.82028 | 0.61189  |
| O216 | 0.60564 | 0.84364 | 0.80563  |
| O217 | 0.73041 | 0.85833 | 0.7492   |
| O218 | 0.82224 | 0.94385 | 0.68166  |
| O219 | 0.58235 | 0.9448  | 0.67812  |
| O220 | 0.93313 | 0.12068 | 0.91789  |
| O221 | 0.92008 | 0.98916 | 0.93938  |
| O222 | 0.90416 | 0.85735 | 0.9453   |
| O223 | 0.69826 | 0.12126 | 0.88713  |
| O224 | 0.68386 | 0.99592 | 0.94895  |
| O225 | 0.69824 | 0.86297 | 0.94453  |
| O226 | 0.49094 | 0.04093 | 0.71318  |
| O227 | 0.48708 | 0.85729 | 0.72085  |
| O228 | 0.36394 | 0.443   | 0.71111  |
| O229 | 0.30826 | 0.42226 | 0.88663  |
| O230 | 0.21105 | 0.44169 | 0.02303  |
| O231 | 0.11663 | 0.42743 | 0.88564  |
| O232 | 0.1091  | 0.45414 | 0.6899   |
| O233 | 0.23506 | 0.46507 | 0.73621  |
| O234 | 0.35586 | 0.65781 | 0.71585  |
| O235 | 0.30316 | 0.66993 | 0.89376  |
| O236 | 0.19414 | 0.64418 | -0.00003 |
| O237 | 0.08981 | 0.67484 | 0.88496  |
| O238 | 0.10379 | 0.64964 | 0.69097  |
| O239 | 0.22885 | 0.62788 | 0.74107  |
| O240 | 0.3215  | 0.54785 | 0.81899  |
| O241 | 0.08516 | 0.55002 | 0.82379  |
| O242 | 0.43578 | 0.37188 | 0.58258  |
| O243 | 0.4206  | 0.5014  | 0.55219  |
| O244 | 0.41637 | 0.63461 | 0.5435   |
| O245 | 0.19573 | 0.36963 | 0.60797  |
| O246 | 0.1962  | 0.4961  | 0.5515   |
| O247 | 0.19414 | 0.63018 | 0.54828  |
| O248 | 0.99968 | 0.45022 | 0.80052  |
| O249 | 0.98596 | 0.63298 | 0.77578  |
| O250 | 0.14466 | 0.5598  | 0.20699  |
| O251 | 0.20788 | 0.56389 | 0.38085  |
| O252 | 0.30668 | 0.56274 | 0.51486  |
| O253 | 0.4044  | 0.56477 | 0.37937  |
| O254 | 0.40198 | 0.55675 | 0.18287  |

|      |         |         |         |
|------|---------|---------|---------|
| O255 | 0.27437 | 0.53381 | 0.21803 |
| O256 | 0.14479 | 0.32529 | 0.23929 |
| O257 | 0.20089 | 0.34287 | 0.41348 |
| O258 | 0.31271 | 0.35322 | 0.51624 |
| O259 | 0.41525 | 0.33133 | 0.39472 |
| O260 | 0.39976 | 0.33089 | 0.19778 |
| O261 | 0.27495 | 0.35145 | 0.24941 |
| O262 | 0.18653 | 0.44662 | 0.29038 |
| O263 | 0.41742 | 0.44619 | 0.29424 |
| O264 | 0.07247 | 0.61841 | 0.06448 |
| O265 | 0.0895  | 0.48658 | 0.05944 |
| O266 | 0.11087 | 0.35527 | 0.05123 |
| O267 | 0.31306 | 0.62068 | 0.07761 |
| O268 | 0.33194 | 0.48838 | 0.05272 |
| O269 | 0.30979 | 0.35533 | 0.05586 |
| O270 | 0.51462 | 0.53755 | 0.27206 |
| O271 | 0.51733 | 0.35843 | 0.27349 |
| O272 | 0.44023 | 0.74636 | 0.63775 |
| O273 | 0.19633 | 0.74294 | 0.64915 |
| O274 | 0.27499 | 0.74554 | 0.05019 |
| O275 | 0.11142 | 0.74447 | 0.04897 |
| O276 | 0.06523 | 0.2453  | 0.13663 |
| O277 | 0.30735 | 0.24011 | 0.15047 |
| O278 | 0.23154 | 0.24983 | 0.55153 |
| O279 | 0.39449 | 0.24933 | 0.5478  |
| O280 | 0.56507 | 0.24828 | 0.36043 |
| O281 | 0.80578 | 0.24058 | 0.34212 |
| O282 | 0.73045 | 0.23935 | 0.94977 |
| O283 | 0.88876 | 0.24362 | 0.94977 |
| O284 | 0.94005 | 0.74499 | 0.85755 |
| O285 | 0.69644 | 0.74903 | 0.85475 |
| O286 | 0.77354 | 0.74127 | 0.44744 |
| O287 | 0.60909 | 0.7478  | 0.44737 |
| O288 | 0.91517 | 0.18529 | 0.56065 |
| O289 | 0.81675 | 0.19425 | 0.67049 |
| O290 | 0.85775 | 0.3021  | 0.58023 |
| O291 | 0.92145 | 0.26203 | 0.71979 |
| O292 | 0.02304 | 0.23975 | 0.4369  |
| O293 | 0.00576 | 0.35763 | 0.60558 |
| GA29 | 0.92441 | 0.35253 | 0.66205 |
| H295 | 0.94943 | 0.20496 | 0.517   |
| H296 | 0.819   | 0.33425 | 0.49599 |
| H297 | 0.8114  | 0.14722 | 0.64336 |
| H298 | 0.07271 | 0.62382 | 0.45609 |

|                            |         |         |         |
|----------------------------|---------|---------|---------|
| H299                       | 0.0073  | 0.60875 | 0.37099 |
| H300                       | 0.97175 | 0.6376  | 0.56282 |
| H301                       | 0.01096 | 0.40027 | 0.56917 |
| H302                       | 0.90459 | 0.53821 | 0.59946 |
| H303                       | 0.01204 | 0.41884 | 0.38369 |
| H304                       | 0.0843  | 0.51561 | 0.35141 |
| H305                       | 0.91281 | 0.43606 | 0.48761 |
| H306                       | 0.09518 | 0.50607 | 0.48073 |
| AL30                       | 0.82422 | 0.32325 | 0.31695 |
| AL30                       | 0.80492 | 0.46809 | 0.70326 |
| P309                       | 0.87795 | 0.2348  | 0.63371 |
| C310                       | 0.94325 | 0.53607 | 0.54252 |
| C311                       | 0.03109 | 0.58945 | 0.43987 |
| C312                       | 0.98043 | 0.59078 | 0.52238 |
| C313                       | 0.00534 | 0.46522 | 0.42619 |
| C314                       | 0.95152 | 0.47448 | 0.4849  |
| C315                       | 0.05809 | 0.51833 | 0.42275 |
| C316                       | 0.07213 | 0.26072 | 0.46837 |
| <b>TS<sub>CO+H2O</sub></b> |         |         |         |
| SI2                        | 0.42496 | 0.05433 | 0.64524 |
| SI3                        | 0.3034  | 0.02259 | 0.78485 |
| SI4                        | 0.28218 | 0.05518 | 0.01021 |
| SI5                        | 0.12209 | 0.05846 | 0.01063 |
| SI6                        | 0.07085 | 0.02506 | 0.79625 |
| SI7                        | 0.17811 | 0.05261 | 0.64675 |
| SI8                        | 0.42172 | 0.82206 | 0.66871 |
| SI9                        | 0.30433 | 0.86373 | 0.80732 |
| SI10                       | 0.26935 | 0.82475 | 0.02794 |
| SI11                       | 0.11457 | 0.82256 | 0.01582 |
| SI12                       | 0.06564 | 0.86692 | 0.79976 |
| SI13                       | 0.1819  | 0.82128 | 0.67215 |
| SI14                       | 0.07748 | 0.93779 | 0.14953 |
| SI15                       | 0.19831 | 0.96769 | 0.2935  |
| SI16                       | 0.21849 | 0.93176 | 0.51382 |
| SI17                       | 0.37784 | 0.93119 | 0.51428 |
| SI18                       | 0.43195 | 0.96499 | 0.30388 |
| SI19                       | 0.3223  | 0.93956 | 0.15447 |
| SI20                       | 0.08098 | 0.16722 | 0.16272 |
| SI21                       | 0.19982 | 0.1246  | 0.30378 |
| SI22                       | 0.23397 | 0.17044 | 0.51993 |
| SI23                       | 0.38886 | 0.17148 | 0.51048 |
| SI24                       | 0.4399  | 0.12337 | 0.30102 |
| SI25                       | 0.32258 | 0.16121 | 0.16822 |

|      |         |         |         |
|------|---------|---------|---------|
| SI26 | 0.57641 | 0.55367 | 0.34511 |
| SI27 | 0.69246 | 0.52478 | 0.19175 |
| SI28 | 0.71214 | 0.55991 | 0.97921 |
| SI29 | 0.87201 | 0.56059 | 0.9721  |
| SI30 | 0.9323  | 0.52604 | 0.18212 |
| SI31 | 0.81741 | 0.55074 | 0.32219 |
| SI32 | 0.57839 | 0.32621 | 0.336   |
| SI33 | 0.69946 | 0.36984 | 0.19692 |
| SI34 | 0.72783 | 0.31771 | 0.98783 |
| SI35 | 0.88221 | 0.3217  | 0.98851 |
| SI36 | 0.93927 | 0.36843 | 0.19437 |
| SI37 | 0.92689 | 0.43487 | 0.84336 |
| SI38 | 0.77175 | 0.4369  | 0.47374 |
| SI39 | 0.61595 | 0.43384 | 0.4821  |
| SI40 | 0.57575 | 0.46796 | 0.70064 |
| SI41 | 0.67851 | 0.43142 | 0.85571 |
| SI42 | 0.91725 | 0.67133 | 0.82176 |
| SI43 | 0.80238 | 0.62904 | 0.68829 |
| SI44 | 0.76734 | 0.66165 | 0.46641 |
| SI45 | 0.61204 | 0.66823 | 0.47808 |
| SI46 | 0.56536 | 0.6254  | 0.69672 |
| SI47 | 0.6812  | 0.67399 | 0.81926 |
| SI48 | 0.57699 | 0.93846 | 0.36246 |
| SI49 | 0.69682 | 0.96543 | 0.22187 |
| SI50 | 0.7221  | 0.93289 | 0.99794 |
| SI51 | 0.8818  | 0.92932 | 0.99637 |
| SI52 | 0.93284 | 0.96578 | 0.20625 |
| SI53 | 0.82371 | 0.94117 | 0.36015 |
| SI54 | 0.58352 | 0.17047 | 0.33482 |
| SI55 | 0.69829 | 0.12107 | 0.1977  |
| SI56 | 0.73361 | 0.16151 | 0.97767 |
| SI57 | 0.88725 | 0.16798 | 0.98892 |
| SI58 | 0.93769 | 0.12333 | 0.20095 |
| SI59 | 0.81982 | 0.16385 | 0.32882 |
| SI60 | 0.92557 | 0.05032 | 0.85864 |
| SI61 | 0.80415 | 0.02136 | 0.71179 |
| SI62 | 0.78291 | 0.06093 | 0.49439 |
| SI63 | 0.62345 | 0.06401 | 0.49116 |
| SI64 | 0.57008 | 0.02471 | 0.70016 |
| SI65 | 0.68015 | 0.04645 | 0.85173 |
| SI66 | 0.92189 | 0.82448 | 0.83869 |
| SI67 | 0.80247 | 0.86602 | 0.69605 |
| SI68 | 0.77037 | 0.81969 | 0.48049 |
| SI69 | 0.61605 | 0.82177 | 0.49567 |



|      |         |         |         |
|------|---------|---------|---------|
| SI70 | 0.56637 | 0.86731 | 0.70364 |
| SI71 | 0.68199 | 0.82994 | 0.83697 |
| SI72 | 0.42828 | 0.44294 | 0.63984 |
| SI73 | 0.30771 | 0.46959 | 0.78769 |
| SI74 | 0.28724 | 0.42615 | 0.00574 |
| SI75 | 0.13035 | 0.4279  | 0.00579 |
| SI76 | 0.07816 | 0.46973 | 0.80003 |
| SI77 | 0.18439 | 0.4465  | 0.64231 |
| SI78 | 0.42405 | 0.66697 | 0.65438 |
| SI79 | 0.30211 | 0.62508 | 0.79282 |
| SI80 | 0.26973 | 0.66936 | 0.0064  |
| SI81 | 0.11543 | 0.66977 | 0.00046 |
| SI82 | 0.06342 | 0.62662 | 0.79411 |
| SI83 | 0.17983 | 0.66284 | 0.65878 |
| SI84 | 0.07818 | 0.55086 | 0.13337 |
| SI85 | 0.20148 | 0.52545 | 0.27377 |
| SI86 | 0.22411 | 0.5628  | 0.49718 |
| SI87 | 0.38437 | 0.56438 | 0.49855 |
| SI88 | 0.43365 | 0.52532 | 0.28444 |
| SI89 | 0.32751 | 0.54915 | 0.13215 |
| SI90 | 0.08386 | 0.32265 | 0.15503 |
| SI91 | 0.20146 | 0.36642 | 0.29675 |
| SI92 | 0.23373 | 0.32758 | 0.51948 |
| SI93 | 0.38856 | 0.326   | 0.50831 |
| SI94 | 0.4367  | 0.36678 | 0.29014 |
| SI95 | 0.32187 | 0.31948 | 0.16261 |
| O96  | 0.36018 | 0.05886 | 0.71765 |
| O97  | 0.30128 | 0.05907 | 0.89297 |
| O98  | 0.20191 | 0.04913 | 0.02683 |
| O99  | 0.10385 | 0.06133 | 0.89307 |
| O100 | 0.10381 | 0.05594 | 0.69523 |
| O101 | 0.23071 | 0.03078 | 0.73311 |
| O102 | 0.36082 | 0.82086 | 0.74869 |
| O103 | 0.3069  | 0.84277 | 0.92401 |
| O104 | 0.19167 | 0.8488  | 0.02028 |
| O105 | 0.08657 | 0.83046 | 0.90326 |
| O106 | 0.10453 | 0.83096 | 0.70703 |
| O107 | 0.23058 | 0.84689 | 0.76209 |
| O108 | 0.32079 | 0.94321 | 0.79539 |
| O109 | 0.08721 | 0.94529 | 0.80347 |
| O110 | 0.43304 | 0.12492 | 0.58492 |
| O111 | 0.41782 | 0.99366 | 0.56438 |
| O112 | 0.39911 | 0.86138 | 0.5679  |
| O113 | 0.19513 | 0.12685 | 0.6038  |

|      |         |         |         |
|------|---------|---------|---------|
| O114 | 0.17895 | 0.99682 | 0.55785 |
| O115 | 0.19619 | 0.86305 | 0.57018 |
| O116 | 0.99114 | 0.03831 | 0.78979 |
| O117 | 0.98548 | 0.86032 | 0.78392 |
| O118 | 0.14292 | 0.93513 | 0.22034 |
| O119 | 0.19957 | 0.9244  | 0.39643 |
| O120 | 0.2982  | 0.94396 | 0.52864 |
| O121 | 0.39685 | 0.92558 | 0.39682 |
| O122 | 0.39739 | 0.94197 | 0.19957 |
| O123 | 0.27126 | 0.96459 | 0.24124 |
| O124 | 0.14568 | 0.16338 | 0.23523 |
| O125 | 0.19834 | 0.16075 | 0.41212 |
| O126 | 0.31138 | 0.14592 | 0.51378 |
| O127 | 0.41652 | 0.16749 | 0.39697 |
| O128 | 0.39982 | 0.14999 | 0.20258 |
| O129 | 0.27396 | 0.13073 | 0.25498 |
| O130 | 0.17997 | 0.04588 | 0.31621 |
| O131 | 0.42204 | 0.04514 | 0.32185 |
| O132 | 0.06948 | 0.86589 | 0.09311 |
| O133 | 0.08381 | 0.99628 | 0.06484 |
| O134 | 0.09698 | 0.1289  | 0.05846 |
| O135 | 0.30548 | 0.86313 | 0.12013 |
| O136 | 0.31743 | 0.98896 | 0.05794 |
| O137 | 0.30949 | 0.12334 | 0.0627  |
| O138 | 0.51044 | 0.94622 | 0.29447 |
| O139 | 0.51973 | 0.13241 | 0.28372 |
| O140 | 0.64395 | 0.55255 | 0.27955 |
| O141 | 0.68275 | 0.57036 | 0.09184 |
| O142 | 0.79271 | 0.54867 | 0.98351 |
| O143 | 0.90717 | 0.56364 | 0.08144 |
| O144 | 0.89409 | 0.55349 | 0.28139 |
| O145 | 0.76941 | 0.5348  | 0.22781 |
| O146 | 0.64662 | 0.33684 | 0.27524 |
| O147 | 0.69669 | 0.32129 | 0.09932 |
| O148 | 0.80461 | 0.3465  | 0.98634 |
| O149 | 0.91238 | 0.32332 | 0.10102 |
| O150 | 0.90729 | 0.34376 | 0.29815 |
| O151 | 0.77333 | 0.37177 | 0.24214 |
| O152 | 0.67592 | 0.44636 | 0.1682  |
| O153 | 0.92096 | 0.44629 | 0.16852 |
| O154 | 0.56805 | 0.6273  | 0.39623 |
| O155 | 0.57653 | 0.49765 | 0.43406 |
| O156 | 0.58306 | 0.36384 | 0.444   |
| O157 | 0.80026 | 0.62311 | 0.37173 |

|      |         |         |         |
|------|---------|---------|---------|
| O158 | 0.81045 | 0.49127 | 0.40463 |
| O159 | 0.80106 | 0.36029 | 0.44241 |
| O160 | 0.01153 | 0.54218 | 0.20125 |
| O161 | 0.02096 | 0.36311 | 0.2016  |
| O162 | 0.88239 | 0.4251  | 0.74052 |
| O163 | 0.78934 | 0.44442 | 0.5879  |
| O164 | 0.69323 | 0.43887 | 0.44608 |
| O165 | 0.61004 | 0.43537 | 0.602   |
| O166 | 0.6068  | 0.43211 | 0.79762 |
| O167 | 0.74183 | 0.43681 | 0.78459 |
| O168 | 0.86134 | 0.67701 | 0.73466 |
| O169 | 0.80597 | 0.63904 | 0.5673  |
| O170 | 0.68874 | 0.64108 | 0.47604 |
| O171 | 0.58103 | 0.6578  | 0.58832 |
| O172 | 0.60347 | 0.66746 | 0.78382 |
| O173 | 0.72918 | 0.65625 | 0.72477 |
| O174 | 0.81494 | 0.55308 | 0.72226 |
| O175 | 0.59093 | 0.54827 | 0.70098 |
| O176 | 0.92621 | 0.37045 | 0.91676 |
| O177 | 0.90421 | 0.5005  | 0.90527 |
| O178 | 0.88831 | 0.63173 | 0.91835 |
| O179 | 0.67999 | 0.36026 | 0.91488 |
| O180 | 0.67608 | 0.49418 | 0.93409 |
| O181 | 0.69581 | 0.62673 | 0.9148  |
| O182 | 0.49566 | 0.45596 | 0.70232 |
| O183 | 0.48477 | 0.63031 | 0.71456 |
| O184 | 0.64114 | 0.9278  | 0.29    |
| O185 | 0.7022  | 0.92752 | 0.1149  |
| O186 | 0.80224 | 0.94206 | 0.98298 |
| O187 | 0.90113 | 0.92362 | 0.11364 |
| O188 | 0.89763 | 0.94374 | 0.31035 |
| O189 | 0.7692  | 0.96223 | 0.27604 |
| O190 | 0.6462  | 0.16823 | 0.25842 |
| O191 | 0.69619 | 0.14357 | 0.0817  |
| O192 | 0.81145 | 0.13801 | 0.98699 |
| O193 | 0.91595 | 0.16553 | 0.10237 |
| O194 | 0.89802 | 0.14892 | 0.29952 |
| O195 | 0.77321 | 0.12742 | 0.24365 |
| O196 | 0.67408 | 0.04315 | 0.20717 |
| O197 | 0.92098 | 0.04465 | 0.18191 |
| O198 | 0.56845 | 0.87275 | 0.43346 |
| O199 | 0.58388 | 0.00437 | 0.43344 |
| O200 | 0.60386 | 0.13541 | 0.44057 |
| O201 | 0.8108  | 0.86532 | 0.40025 |

|      |         |         |         |
|------|---------|---------|---------|
| O202 | 0.82109 | 0.99451 | 0.45266 |
| O203 | 0.80605 | 0.12889 | 0.43803 |
| O204 | 0.01219 | 0.95043 | 0.21839 |
| O205 | 0.01761 | 0.13345 | 0.22016 |
| O206 | 0.86035 | 0.05094 | 0.78657 |
| O207 | 0.8017  | 0.07091 | 0.61336 |
| O208 | 0.70305 | 0.04949 | 0.48156 |
| O209 | 0.60222 | 0.06723 | 0.60805 |
| O210 | 0.60534 | 0.04514 | 0.80508 |
| O211 | 0.73157 | 0.02157 | 0.76504 |
| O212 | 0.85766 | 0.83165 | 0.76697 |
| O213 | 0.80401 | 0.82666 | 0.5904  |
| O214 | 0.69344 | 0.84652 | 0.48669 |
| O215 | 0.59306 | 0.82044 | 0.61223 |
| O216 | 0.60473 | 0.84571 | 0.8059  |
| O217 | 0.72934 | 0.86026 | 0.74829 |
| O218 | 0.82106 | 0.94494 | 0.67778 |
| O219 | 0.58146 | 0.94539 | 0.67622 |
| O220 | 0.93301 | 0.12222 | 0.91486 |
| O221 | 0.92106 | 0.99116 | 0.94249 |
| O222 | 0.90536 | 0.85912 | 0.94572 |
| O223 | 0.69804 | 0.12226 | 0.8857  |
| O224 | 0.68427 | 0.9971  | 0.94835 |
| O225 | 0.69841 | 0.86425 | 0.94386 |
| O226 | 0.49115 | 0.04187 | 0.71243 |
| O227 | 0.48643 | 0.85748 | 0.71989 |
| O228 | 0.3666  | 0.44045 | 0.71802 |
| O229 | 0.30119 | 0.4227  | 0.88649 |
| O230 | 0.20879 | 0.44096 | 0.03046 |
| O231 | 0.11982 | 0.42943 | 0.88548 |
| O232 | 0.1103  | 0.45534 | 0.69026 |
| O233 | 0.23806 | 0.46714 | 0.72646 |
| O234 | 0.35585 | 0.65806 | 0.71797 |
| O235 | 0.3013  | 0.66926 | 0.89455 |
| O236 | 0.19255 | 0.64327 | 0.00174 |
| O237 | 0.08851 | 0.67378 | 0.88603 |
| O238 | 0.10259 | 0.6487  | 0.69205 |
| O239 | 0.22844 | 0.6273  | 0.74088 |
| O240 | 0.32132 | 0.54752 | 0.81912 |
| O241 | 0.08122 | 0.54947 | 0.82386 |
| O242 | 0.43416 | 0.37155 | 0.58175 |
| O243 | 0.41768 | 0.50118 | 0.55622 |
| O244 | 0.41327 | 0.63403 | 0.54425 |
| O245 | 0.19401 | 0.3695  | 0.60523 |

|      |         |         |         |
|------|---------|---------|---------|
| O246 | 0.19034 | 0.4953  | 0.54481 |
| O247 | 0.19215 | 0.62937 | 0.5491  |
| O248 | 1.00201 | 0.44308 | 0.79832 |
| O249 | 0.98375 | 0.63438 | 0.7765  |
| O250 | 0.14159 | 0.55822 | 0.2085  |
| O251 | 0.20428 | 0.56529 | 0.37975 |
| O252 | 0.30386 | 0.56043 | 0.51442 |
| O253 | 0.40232 | 0.56332 | 0.38114 |
| O254 | 0.39991 | 0.55606 | 0.18435 |
| O255 | 0.27219 | 0.53271 | 0.21772 |
| O256 | 0.14542 | 0.32633 | 0.23398 |
| O257 | 0.19865 | 0.34058 | 0.41158 |
| O258 | 0.31119 | 0.35237 | 0.51457 |
| O259 | 0.41387 | 0.33072 | 0.39368 |
| O260 | 0.39884 | 0.3311  | 0.19648 |
| O261 | 0.2747  | 0.35308 | 0.24892 |
| O262 | 0.18448 | 0.44661 | 0.29491 |
| O263 | 0.4167  | 0.44577 | 0.29476 |
| O264 | 0.07051 | 0.61838 | 0.06623 |
| O265 | 0.08653 | 0.4865  | 0.05939 |
| O266 | 0.10682 | 0.35519 | 0.0483  |
| O267 | 0.31161 | 0.61977 | 0.07806 |
| O268 | 0.3304  | 0.48756 | 0.05265 |
| O269 | 0.30833 | 0.35455 | 0.05468 |
| O270 | 0.51293 | 0.5389  | 0.2733  |
| O271 | 0.51626 | 0.35787 | 0.27253 |
| O272 | 0.44012 | 0.74574 | 0.63755 |
| O273 | 0.19533 | 0.74234 | 0.64935 |
| O274 | 0.27388 | 0.74484 | 0.05105 |
| O275 | 0.11051 | 0.7442  | 0.04914 |
| O276 | 0.0647  | 0.24481 | 0.13581 |
| O277 | 0.30603 | 0.24016 | 0.15184 |
| O278 | 0.22882 | 0.24912 | 0.55077 |
| O279 | 0.39334 | 0.24898 | 0.54712 |
| O280 | 0.56391 | 0.2476  | 0.35837 |
| O281 | 0.80499 | 0.24204 | 0.3351  |
| O282 | 0.72808 | 0.24018 | 0.95127 |
| O283 | 0.88861 | 0.24472 | 0.94921 |
| O284 | 0.9385  | 0.74608 | 0.85866 |
| O285 | 0.6949  | 0.75077 | 0.85317 |
| O286 | 0.77423 | 0.74191 | 0.44559 |
| O287 | 0.60865 | 0.74717 | 0.4488  |
| O288 | 0.92721 | 0.18543 | 0.60347 |
| O289 | 0.82113 | 0.21492 | 0.68179 |

|                                                       |         |         |         |
|-------------------------------------------------------|---------|---------|---------|
| O290                                                  | 0.87668 | 0.30128 | 0.55879 |
| O291                                                  | 0.92228 | 0.28967 | 0.72476 |
| O292                                                  | 0.03404 | 0.21348 | 0.45555 |
| O293                                                  | 0.02627 | 0.34612 | 0.60763 |
| GA29                                                  | 0.93705 | 0.37363 | 0.62942 |
| H295                                                  | 0.96548 | 0.19559 | 0.56058 |
| H296                                                  | 0.8257  | 0.33373 | 0.49848 |
| H297                                                  | 0.81314 | 0.16979 | 0.65354 |
| H298                                                  | 0.08584 | 0.57536 | 0.50055 |
| H299                                                  | 0.03486 | 0.58134 | 0.3956  |
| H300                                                  | 0.97242 | 0.61632 | 0.56208 |
| H301                                                  | 0.0474  | 0.32423 | 0.66442 |
| H302                                                  | 0.89261 | 0.53043 | 0.59961 |
| H303                                                  | 0.00673 | 0.38525 | 0.42079 |
| H304                                                  | 0.09239 | 0.46907 | 0.39427 |
| H305                                                  | 0.89861 | 0.43241 | 0.47156 |
| H306                                                  | 0.04958 | 0.42797 | 0.5201  |
| AL30                                                  | 0.82344 | 0.32553 | 0.32041 |
| AL30                                                  | 0.80372 | 0.46703 | 0.71001 |
| P309                                                  | 0.88756 | 0.24895 | 0.6441  |
| C310                                                  | 0.93573 | 0.51716 | 0.55436 |
| C311                                                  | 0.03984 | 0.55429 | 0.4682  |
| C312                                                  | 0.9799  | 0.56559 | 0.53318 |
| C313                                                  | 0.00203 | 0.43328 | 0.46008 |
| C314                                                  | 0.94078 | 0.44648 | 0.51927 |
| C315                                                  | 0.04836 | 0.48342 | 0.43766 |
| C316                                                  | 0.04748 | 0.26383 | 0.41922 |
| <b>C<sub>6</sub>H<sub>7</sub>Ga+H<sub>2</sub>O+CO</b> |         |         |         |
| SI2                                                   | 0.42473 | 0.05389 | 0.64538 |
| SI3                                                   | 0.30311 | 0.02206 | 0.78481 |
| SI4                                                   | 0.28216 | 0.05422 | 0.01038 |
| SI5                                                   | 0.12211 | 0.05743 | 0.01066 |
| SI6                                                   | 0.07082 | 0.02439 | 0.79665 |
| SI7                                                   | 0.17769 | 0.05183 | 0.64664 |
| SI8                                                   | 0.42121 | 0.82173 | 0.66959 |
| SI9                                                   | 0.30374 | 0.86329 | 0.80771 |
| SI10                                                  | 0.26886 | 0.82388 | 0.02825 |
| SI11                                                  | 0.11408 | 0.8212  | 0.01523 |
| SI12                                                  | 0.06546 | 0.86636 | 0.79951 |
| SI13                                                  | 0.18162 | 0.82098 | 0.6721  |
| SI14                                                  | 0.07722 | 0.93645 | 0.1489  |
| SI15                                                  | 0.19787 | 0.96661 | 0.29293 |
| SI16                                                  | 0.21829 | 0.93117 | 0.51355 |

|      |         |         |          |
|------|---------|---------|----------|
| SI17 | 0.3776  | 0.93074 | 0.51454  |
| SI18 | 0.43186 | 0.96415 | 0.30427  |
| SI19 | 0.32216 | 0.93861 | 0.15466  |
| SI20 | 0.08094 | 0.1666  | 0.16215  |
| SI21 | 0.19976 | 0.12344 | 0.30268  |
| SI22 | 0.23348 | 0.16917 | 0.51918  |
| SI23 | 0.38828 | 0.17067 | 0.51033  |
| SI24 | 0.43983 | 0.12246 | 0.30131  |
| SI25 | 0.32295 | 0.16002 | 0.16804  |
| SI26 | 0.57625 | 0.55281 | 0.34713  |
| SI27 | 0.69278 | 0.5242  | 0.19411  |
| SI28 | 0.71204 | 0.55929 | 0.98081  |
| SI29 | 0.87172 | 0.5606  | 0.97489  |
| SI30 | 0.93118 | 0.52489 | 0.18513  |
| SI31 | 0.81743 | 0.54836 | 0.32678  |
| SI32 | 0.57789 | 0.32606 | 0.33708  |
| SI33 | 0.69887 | 0.36983 | 0.19791  |
| SI34 | 0.72707 | 0.3181  | 0.98831  |
| SI35 | 0.88151 | 0.32157 | 0.99191  |
| SI36 | 0.9386  | 0.36767 | 0.19705  |
| SI37 | 0.92517 | 0.43465 | 0.84812  |
| SI38 | 0.77195 | 0.43463 | 0.47818  |
| SI39 | 0.61513 | 0.43278 | 0.48571  |
| SI40 | 0.57223 | 0.46715 | 0.70335  |
| SI41 | 0.67407 | 0.43272 | 0.85843  |
| SI42 | 0.91611 | 0.67136 | 0.82462  |
| SI43 | 0.80192 | 0.62867 | 0.68967  |
| SI44 | 0.76716 | 0.66122 | 0.46796  |
| SI45 | 0.61165 | 0.66757 | 0.48054  |
| SI46 | 0.56441 | 0.62474 | 0.69905  |
| SI47 | 0.6809  | 0.67301 | 0.8207   |
| SI48 | 0.57721 | 0.9379  | 0.36247  |
| SI49 | 0.69683 | 0.96487 | 0.22192  |
| SI50 | 0.72205 | 0.93261 | -0.00225 |
| SI51 | 0.88159 | 0.92976 | 0.9969   |
| SI52 | 0.93259 | 0.96529 | 0.20674  |
| SI53 | 0.82357 | 0.94093 | 0.36091  |
| SI54 | 0.5833  | 0.17013 | 0.3353   |
| SI55 | 0.69812 | 0.12038 | 0.19836  |
| SI56 | 0.7332  | 0.16182 | 0.97811  |
| SI57 | 0.88712 | 0.16818 | 0.98837  |
| SI58 | 0.93775 | 0.12298 | 0.20065  |
| SI59 | 0.81973 | 0.16333 | 0.32884  |
| SI60 | 0.92546 | 0.05016 | 0.8591   |

|      |         |         |         |
|------|---------|---------|---------|
| SI61 | 0.80383 | 0.02052 | 0.71213 |
| SI62 | 0.78332 | 0.06112 | 0.49494 |
| SI63 | 0.62366 | 0.06389 | 0.49132 |
| SI64 | 0.56989 | 0.02447 | 0.70047 |
| SI65 | 0.67983 | 0.04637 | 0.85217 |
| SI66 | 0.92167 | 0.82456 | 0.83913 |
| SI67 | 0.802   | 0.86527 | 0.69608 |
| SI68 | 0.77024 | 0.8189  | 0.48073 |
| SI69 | 0.61577 | 0.82119 | 0.49638 |
| SI70 | 0.56597 | 0.86702 | 0.70439 |
| SI71 | 0.68169 | 0.82932 | 0.83717 |
| SI72 | 0.42566 | 0.44272 | 0.63833 |
| SI73 | 0.30574 | 0.4684  | 0.78876 |
| SI74 | 0.28678 | 0.42525 | 0.00627 |
| SI75 | 0.12884 | 0.42734 | 0.00548 |
| SI76 | 0.07479 | 0.46664 | 0.79776 |
| SI77 | 0.18381 | 0.44411 | 0.6446  |
| SI78 | 0.42348 | 0.66659 | 0.65545 |
| SI79 | 0.30054 | 0.62442 | 0.79212 |
| SI80 | 0.2697  | 0.66846 | 0.00616 |
| SI81 | 0.11532 | 0.66779 | 0.00094 |
| SI82 | 0.06189 | 0.62523 | 0.79267 |
| SI83 | 0.17838 | 0.66265 | 0.65864 |
| SI84 | 0.07737 | 0.54992 | 0.13529 |
| SI85 | 0.20093 | 0.52467 | 0.27499 |
| SI86 | 0.22372 | 0.56272 | 0.49925 |
| SI87 | 0.38403 | 0.56494 | 0.49823 |
| SI88 | 0.43325 | 0.52516 | 0.28521 |
| SI89 | 0.3271  | 0.54899 | 0.13325 |
| SI90 | 0.08334 | 0.32175 | 0.15497 |
| SI91 | 0.20109 | 0.36495 | 0.2965  |
| SI92 | 0.23296 | 0.32625 | 0.51814 |
| SI93 | 0.38767 | 0.32506 | 0.50763 |
| SI94 | 0.4362  | 0.36672 | 0.29051 |
| SI95 | 0.32168 | 0.31832 | 0.16363 |
| O96  | 0.35997 | 0.0584  | 0.71783 |
| O97  | 0.30089 | 0.05826 | 0.89305 |
| O98  | 0.2019  | 0.04851 | 0.02744 |
| O99  | 0.10424 | 0.0609  | 0.89294 |
| O100 | 0.10342 | 0.05525 | 0.69531 |
| O101 | 0.23049 | 0.03054 | 0.73292 |
| O102 | 0.36034 | 0.82032 | 0.74958 |
| O103 | 0.30622 | 0.8426  | 0.92444 |
| O104 | 0.19109 | 0.84764 | 0.02077 |



|      |         |         |         |
|------|---------|---------|---------|
| O105 | 0.08658 | 0.82917 | 0.90233 |
| O106 | 0.10414 | 0.83125 | 0.70601 |
| O107 | 0.23001 | 0.8467  | 0.76235 |
| O108 | 0.32041 | 0.94271 | 0.79519 |
| O109 | 0.08708 | 0.94471 | 0.80448 |
| O110 | 0.43269 | 0.12442 | 0.58485 |
| O111 | 0.41774 | 0.99317 | 0.56459 |
| O112 | 0.39842 | 0.86103 | 0.5688  |
| O113 | 0.19423 | 0.12608 | 0.60322 |
| O114 | 0.17845 | 0.99597 | 0.55795 |
| O115 | 0.19653 | 0.8624  | 0.57001 |
| O116 | 0.9911  | 0.03768 | 0.79066 |
| O117 | 0.98526 | 0.85998 | 0.78377 |
| O118 | 0.14262 | 0.93368 | 0.21984 |
| O119 | 0.19912 | 0.92384 | 0.39629 |
| O120 | 0.29795 | 0.94396 | 0.5281  |
| O121 | 0.39696 | 0.92467 | 0.39727 |
| O122 | 0.39722 | 0.94095 | 0.20005 |
| O123 | 0.27099 | 0.9637  | 0.24123 |
| O124 | 0.14591 | 0.16259 | 0.23413 |
| O125 | 0.19793 | 0.15923 | 0.41137 |
| O126 | 0.31089 | 0.14471 | 0.51362 |
| O127 | 0.416   | 0.16675 | 0.39686 |
| O128 | 0.40014 | 0.14869 | 0.20238 |
| O129 | 0.27409 | 0.12946 | 0.25458 |
| O130 | 0.1793  | 0.04488 | 0.31475 |
| O131 | 0.42174 | 0.04429 | 0.32231 |
| O132 | 0.06883 | 0.8646  | 0.09241 |
| O133 | 0.08399 | 0.9949  | 0.06413 |
| O134 | 0.09626 | 0.1276  | 0.05829 |
| O135 | 0.30507 | 0.86224 | 0.12046 |
| O136 | 0.31741 | 0.98797 | 0.05801 |
| O137 | 0.30989 | 0.12226 | 0.06249 |
| O138 | 0.51046 | 0.94583 | 0.29498 |
| O139 | 0.51969 | 0.1316  | 0.28451 |
| O140 | 0.64355 | 0.55211 | 0.28093 |
| O141 | 0.68552 | 0.57086 | 0.09476 |
| O142 | 0.79245 | 0.54544 | 0.98002 |
| O143 | 0.90359 | 0.56344 | 0.08616 |
| O144 | 0.89372 | 0.55121 | 0.28546 |
| O145 | 0.76926 | 0.53181 | 0.23277 |
| O146 | 0.64605 | 0.33681 | 0.27619 |
| O147 | 0.6965  | 0.32136 | 0.10012 |
| O148 | 0.80401 | 0.34655 | 0.98606 |

|      |         |         |         |
|------|---------|---------|---------|
| O149 | 0.90974 | 0.32174 | 0.10522 |
| O150 | 0.90658 | 0.34297 | 0.30064 |
| O151 | 0.77251 | 0.37174 | 0.24388 |
| O152 | 0.67511 | 0.4462  | 0.16876 |
| O153 | 0.92023 | 0.44516 | 0.16898 |
| O154 | 0.5679  | 0.62623 | 0.39889 |
| O155 | 0.57679 | 0.49665 | 0.43599 |
| O156 | 0.58291 | 0.36292 | 0.44562 |
| O157 | 0.79956 | 0.62111 | 0.37454 |
| O158 | 0.81073 | 0.48937 | 0.41028 |
| O159 | 0.79975 | 0.35766 | 0.44418 |
| O160 | 0.01021 | 0.54167 | 0.20111 |
| O161 | 0.02013 | 0.36139 | 0.20135 |
| O162 | 0.87628 | 0.42251 | 0.75105 |
| O163 | 0.79117 | 0.43913 | 0.59233 |
| O164 | 0.69311 | 0.43786 | 0.45297 |
| O165 | 0.60691 | 0.43374 | 0.60547 |
| O166 | 0.60148 | 0.43203 | 0.8025  |
| O167 | 0.73481 | 0.44131 | 0.78332 |
| O168 | 0.85947 | 0.67703 | 0.73871 |
| O169 | 0.80615 | 0.63996 | 0.56914 |
| O170 | 0.68854 | 0.64099 | 0.47883 |
| O171 | 0.58078 | 0.65738 | 0.59099 |
| O172 | 0.60294 | 0.66588 | 0.78673 |
| O173 | 0.72806 | 0.65447 | 0.72568 |
| O174 | 0.81522 | 0.55248 | 0.72175 |
| O175 | 0.58867 | 0.54718 | 0.70243 |
| O176 | 0.92705 | 0.37117 | 0.92327 |
| O177 | 0.90822 | 0.50229 | 0.90874 |
| O178 | 0.88752 | 0.63224 | 0.92209 |
| O179 | 0.67928 | 0.36096 | 0.91566 |
| O180 | 0.67238 | 0.49464 | 0.9384  |
| O181 | 0.69659 | 0.62656 | 0.91688 |
| O182 | 0.4919  | 0.45611 | 0.70352 |
| O183 | 0.48391 | 0.63057 | 0.71717 |
| O184 | 0.64103 | 0.92689 | 0.28943 |
| O185 | 0.70278 | 0.9271  | 0.11492 |
| O186 | 0.8021  | 0.94237 | 0.98212 |
| O187 | 0.90011 | 0.92347 | 0.11438 |
| O188 | 0.89751 | 0.94345 | 0.31107 |
| O189 | 0.76897 | 0.96196 | 0.27689 |
| O190 | 0.64613 | 0.16763 | 0.25914 |
| O191 | 0.69657 | 0.1436  | 0.08264 |
| O192 | 0.8112  | 0.13866 | 0.98646 |

|      |         |         |         |
|------|---------|---------|---------|
| O193 | 0.91627 | 0.16453 | 0.10141 |
| O194 | 0.89796 | 0.14914 | 0.29885 |
| O195 | 0.77291 | 0.12567 | 0.24522 |
| O196 | 0.6737  | 0.04249 | 0.2069  |
| O197 | 0.92101 | 0.04425 | 0.18274 |
| O198 | 0.56854 | 0.87238 | 0.4338  |
| O199 | 0.58496 | 0.00399 | 0.43296 |
| O200 | 0.60357 | 0.13532 | 0.4413  |
| O201 | 0.81061 | 0.86519 | 0.40123 |
| O202 | 0.8211  | 0.9945  | 0.45325 |
| O203 | 0.80746 | 0.12897 | 0.43909 |
| O204 | 0.01193 | 0.94957 | 0.21772 |
| O205 | 0.01761 | 0.13322 | 0.2205  |
| O206 | 0.86028 | 0.04932 | 0.78703 |
| O207 | 0.80196 | 0.0709  | 0.61429 |
| O208 | 0.70347 | 0.05042 | 0.48198 |
| O209 | 0.60224 | 0.06657 | 0.60812 |
| O210 | 0.6051  | 0.04529 | 0.80528 |
| O211 | 0.73132 | 0.02156 | 0.76542 |
| O212 | 0.85736 | 0.83182 | 0.76758 |
| O213 | 0.80374 | 0.8254  | 0.59088 |
| O214 | 0.69326 | 0.84563 | 0.48715 |
| O215 | 0.59266 | 0.82032 | 0.61288 |
| O216 | 0.60434 | 0.84522 | 0.80659 |
| O217 | 0.72887 | 0.85959 | 0.74823 |
| O218 | 0.81997 | 0.94431 | 0.67677 |
| O219 | 0.58124 | 0.9451  | 0.67726 |
| O220 | 0.93244 | 0.12301 | 0.91282 |
| O221 | 0.92107 | 0.99224 | 0.9448  |
| O222 | 0.90567 | 0.86002 | 0.9457  |
| O223 | 0.69765 | 0.12215 | 0.8865  |
| O224 | 0.68378 | 0.99673 | 0.94848 |
| O225 | 0.69856 | 0.86385 | 0.94384 |
| O226 | 0.491   | 0.04173 | 0.71248 |
| O227 | 0.48599 | 0.8573  | 0.72048 |
| O228 | 0.36181 | 0.44073 | 0.71275 |
| O229 | 0.30467 | 0.42163 | 0.88808 |
| O230 | 0.20779 | 0.44063 | 0.02499 |
| O231 | 0.11505 | 0.42792 | 0.88571 |
| O232 | 0.10725 | 0.44597 | 0.68907 |
| O233 | 0.23292 | 0.46305 | 0.73577 |
| O234 | 0.3545  | 0.65699 | 0.71705 |
| O235 | 0.30037 | 0.66876 | 0.8937  |
| O236 | 0.19264 | 0.64191 | 0.00297 |

|      |         |         |         |
|------|---------|---------|---------|
| O237 | 0.08869 | 0.66962 | 0.88631 |
| O238 | 0.10098 | 0.64921 | 0.69171 |
| O239 | 0.22669 | 0.62658 | 0.74086 |
| O240 | 0.31903 | 0.54664 | 0.81828 |
| O241 | 0.07864 | 0.54661 | 0.81546 |
| O242 | 0.43263 | 0.37093 | 0.58155 |
| O243 | 0.41672 | 0.50039 | 0.5536  |
| O244 | 0.41462 | 0.6335  | 0.54512 |
| O245 | 0.19382 | 0.36762 | 0.60528 |
| O246 | 0.19322 | 0.49551 | 0.55218 |
| O247 | 0.19115 | 0.62959 | 0.54911 |
| O248 | 0.99845 | 0.43923 | 0.79349 |
| O249 | 0.98212 | 0.63412 | 0.77845 |
| O250 | 0.14075 | 0.55723 | 0.2102  |
| O251 | 0.2035  | 0.56241 | 0.38235 |
| O252 | 0.30374 | 0.56288 | 0.51521 |
| O253 | 0.40164 | 0.5643  | 0.38068 |
| O254 | 0.4     | 0.55527 | 0.18436 |
| O255 | 0.27159 | 0.53524 | 0.21925 |
| O256 | 0.14541 | 0.32512 | 0.2328  |
| O257 | 0.19667 | 0.33961 | 0.41162 |
| O258 | 0.3102  | 0.3512  | 0.51273 |
| O259 | 0.41354 | 0.32958 | 0.39334 |
| O260 | 0.39878 | 0.33139 | 0.19603 |
| O261 | 0.27495 | 0.34966 | 0.25196 |
| O262 | 0.18673 | 0.44509 | 0.29137 |
| O263 | 0.41595 | 0.44562 | 0.29664 |
| O264 | 0.07026 | 0.61738 | 0.06767 |
| O265 | 0.08609 | 0.48595 | 0.06029 |
| O266 | 0.10625 | 0.35454 | 0.04837 |
| O267 | 0.31266 | 0.61902 | 0.07649 |
| O268 | 0.32897 | 0.48628 | 0.05568 |
| O269 | 0.30606 | 0.35358 | 0.05653 |
| O270 | 0.51273 | 0.53813 | 0.2753  |
| O271 | 0.51593 | 0.35821 | 0.27382 |
| O272 | 0.43953 | 0.74538 | 0.63878 |
| O273 | 0.19478 | 0.74202 | 0.65022 |
| O274 | 0.27376 | 0.74397 | 0.05087 |
| O275 | 0.10995 | 0.74278 | 0.04761 |
| O276 | 0.06472 | 0.24388 | 0.13409 |
| O277 | 0.30691 | 0.23891 | 0.15143 |
| O278 | 0.22801 | 0.24784 | 0.54972 |
| O279 | 0.39232 | 0.24816 | 0.54699 |
| O280 | 0.56338 | 0.24726 | 0.35821 |

|      |         |         |         |
|------|---------|---------|---------|
| O281 | 0.80379 | 0.24127 | 0.33378 |
| O282 | 0.72702 | 0.2405  | 0.95164 |
| O283 | 0.88867 | 0.24523 | 0.94987 |
| O284 | 0.93789 | 0.74626 | 0.86034 |
| O285 | 0.69456 | 0.75013 | 0.85312 |
| O286 | 0.77416 | 0.74129 | 0.44492 |
| O287 | 0.60789 | 0.7464  | 0.45045 |
| O288 | 0.93053 | 0.18067 | 0.61159 |
| O289 | 0.82336 | 0.20854 | 0.68965 |
| O290 | 0.87539 | 0.2931  | 0.55935 |
| O291 | 0.92158 | 0.28714 | 0.72588 |
| O292 | 0.02657 | 0.20798 | 0.45724 |
| O293 | 0.03276 | 0.32922 | 0.63597 |
| GA29 | 0.93139 | 0.37056 | 0.64006 |
| H295 | 0.9623  | 0.18908 | 0.55736 |
| H296 | 0.82268 | 0.3299  | 0.49894 |
| H297 | 0.81422 | 0.16369 | 0.66038 |
| H298 | 0.08707 | 0.56141 | 0.51834 |
| H299 | 0.04306 | 0.57743 | 0.40848 |
| H300 | 0.97199 | 0.60846 | 0.56063 |
| H301 | 1.06635 | 0.36559 | 0.63804 |
| H302 | 0.89305 | 0.52248 | 0.60003 |
| H303 | 1.01332 | 0.37409 | 0.43648 |
| H304 | 0.09295 | 0.46026 | 0.39704 |
| H305 | 0.90171 | 0.42137 | 0.4823  |
| H306 | 0.03906 | 0.30185 | 0.69584 |
| AL30 | 0.8228  | 0.32485 | 0.3209  |
| AL30 | 0.80075 | 0.46693 | 0.71339 |
| P309 | 0.88746 | 0.24336 | 0.6461  |
| C310 | 0.93774 | 0.50865 | 0.55879 |
| C311 | 0.043   | 0.54473 | 0.47549 |
| C312 | 0.98166 | 0.55704 | 0.53591 |
| C313 | 1.0065  | 0.42448 | 0.4671  |
| C314 | 0.9452  | 0.43778 | 0.5261  |
| C315 | 0.05041 | 0.47298 | 0.44409 |
| C316 | 0.04917 | 0.24633 | 0.40312 |
